# Supplementary material for: In-Depth Analysis of Data Characteristics and Comparative Evaluation of DDA and DIA Accuracy in Label-Free Quantitative Proteomics of Biological Samples
Source: Research Square preprint supplement (doi:10.21203/rs.3.rs-7430109/v1), 2025-09-11
Supplement: Supplementary file 1 [file 3f0a6d1d5120a89160681257.xlsx]

## Sheet: Caption
Table S1: The quantified proteomic dataset comprises the following columns: Protein ID: Unique identifier for each detected protein Genename: Official gene symbol of the corresponding protein Sample-specific quantitative values: MS²-based intensity measurements for each biological replicate across experimental conditions

## Sheet: DIA_D
Protein_ID	Genename	C1_1	C1_2	D_1	D_2
A0A024RBG1	NUDT4B	58188	51711.5	62750.2	63095.7
A0A096LP01	SMIM26	62038	55856.9	51745.5	46427.3
A0A0B4J2D5	GATD3B	754228	781707	717459	755520
A0A0B4J2F0	PIGBOS1	126206	142600	122125	116583
A0A0U1RRL7	MMP24OS	293894	328138	227163	345738
A0AV96	RBM47	330264	329245	322586	338757
A0AVF1	TTC26	6988.73	9216.56	21517.4	11252.8
A0AVT1	UBA6	125589	114521	132382	131554
A0FGR8	ESYT2	1.69773e+06	1.65502e+06	1.64815e+06	1.44601e+06
A0JLT2	MED19	118619	115079	113523	122827
A0MZ66	SHTN1	390343	362749	413703	437293
A0PJW6	TMEM223	162288	147225	135744	146240
A0PK00	TMEM120B	19354.5	9072.68	9737.89	12673.6
A1A4S6	ARHGAP10	81052.9	83138	77693.9	93676.8
A1L0T0	ILVBL	1.09174e+06	1.08029e+06	1.01413e+06	1.01611e+06
A1L170	C1orf226	74254.2	71234.7	79748.6	75563.7
A1L188	NDUFAF8	232212	235708	183247	223934
A1L390	PLEKHG3	91311.7	95603.3	88068.7	97513.1
A1L3X0	ELOVL7	70061.3	74888	117788	76402.6
A2A2Y4	FRMD3	11612.1	15675.4	6090.41	5251.85
A2A3N6	PIPSL	190470	69697	216054	231683
A2RRD8	ZNF320	17730.2	18924.6	22321.8	14058.2
A2RRP1	NBAS	715846	761025	662126	718888
A2RTX5	TARS3	715764	664656	925301	884286
A2RU67	FAM234B	26699.3	27440.9	30895.2	33335.7
A2VDF0	FUOM	25466.8	26927.3	25788.9	26060.1
A3KMH1	VWA8	248146	240598	214381	221512
A3KN83	SBNO1	134157	117716	155730	118905
A4D1E9	GTPBP10	423423	413479	379747	382921
A4D1P6	WDR91	72137.6	72593.4	90726.8	85328.2
A4D1U4	DENND11	50531.3	60168.5	53356.4	61151.4
A5A3E0	POTEF	130412	155030	147724	132363
A5D8V6	VPS37C	48788.8	26221	50209.9	50695.2
A5PLL7	PEDS1	51487.8	52323.8	47534.2	40683.1
A5PLN9	TRAPPC13	20480	16533.1	30151.7	28909.3
A5YKK6	CNOT1	928073	950108	995062	1.06897e+06
A6NCE7	MAP1LC3B2	444961	422761	411246	436859
A6NCL7	ANKRD33B	9388.52	9275.63	8874.38	11951.7
A6NDG6	PGP	313825	283538	329071	292985
A6NDU8	C5orf51	75827.3	78333.6	78998.8	79903.8
A6NED2	RCCD1	13380.2	15257	15678	18437.2
A6NFI3	ZNF316	10060	8298.76	10462.1	7535.18
A6NGB9	WIPF3	8886.87	11986.1	14457.5	10806.8
A6NHL2	TUBAL3	456182	485719	445472	412106
A6NHR9	SMCHD1	188864	205495	181884	194490
A6NHY2	ANKDD1B	21939.2	24750.6	25850.2	17968.7
A6NI28	ARHGAP42	2539.37	2165.04	3873.65	2508.55
A6NIH7	UNC119B	76673.1	82890.2	86772.3	77825.2
A6NJ78	METTL15	41551.3	44582.1	39130.3	48164.2
A6NKD9	CCDC85C	25370.2	25859.5	28053.7	30283.1
A6NKF1	SAC3D1	46663.6	42260.3	52697.3	51961
A6NKF2	ARID3C	28769.1	23307.1	16621.5	19279.4
A6ZKI3	RTL8C	156313	148608	205545	192690
A7E2V4	ZSWIM8	20409.3	23890.5	20933.2	26641.3
A8CG34	POM121C	273270	277612	273129	204039
A8MT69	CENPX	33341.7	35229.1	30329.6	33522.2
A8MTT3	CEBPZOS	181386	200222	179253	182412
A8MU46	SMTNL1	71334.8	67234.9	84107.7	80274.3
A8MV65	VGLL3	26834.8	21832.3	19961.6	20437.8
A8MVW0	FAM171A2	34834.4	35553.1	33320.6	24635.4
A8MWD9	SNRPGP15	3.53099e+06	3.10481e+06	3.7766e+06	3.96937e+06
A8MWL7	TMEM14DP	20603.2	19555.7	39696.8	38384.1
A8MXV4	NUDT19	99081.4	93684.2	100883	103955
A9UHW6	MIF4GD	8134	6427.31	9564.37	7238.38
B2RUZ4	SMIM1	56758.7	52279.9	54177.6	41430.9
B7ZAQ6	GPR89A	211088	223798	196466	168339
C4AMC7	WASH3P	56069.9	51460.9	69973.7	58136.4
C9J7I0	UMAD1	13683.4	16865.2	14495.3	18135.4
C9JLW8	MCRIP1	31328.3	23622.7	42577.9	39495.1
D6REC4	CFAP99	111302	126823	144361	121617
E7ERA6	RNF223	14354.3	13842.9	12598.5	11976.5
E9PAV3	NACA	3.48589e+06	3.6301e+06	3.55935e+06	3.72093e+06
E9PRG8	C11orf98	420008	406192	505456	440100
H7BZ55	CROCC2	4381.52	2838.69	10772.3	2463.79
L0R6Q1	SLC35A4	527103	586901	535044	559493
L0R819	ASDURF	46446.3	45605.6	50513.4	49842.3
L0R8F8	MIEF1	246367	243617	232382	236650
O00115	DNASE2	669190	666232	598696	674073
O00116	AGPS	1.212e+06	1.20326e+06	1.09581e+06	1.15005e+06
O00124	UBXN8	51562	49055.8	53551.3	58081.4
O00139	KIF2A	252371	259927	232622	237071
O00142	TK2	65204.8	57138.1	51082.5	60073.4
O00148	DDX39A	1.34436e+06	1.36102e+06	1.43933e+06	1.45684e+06
O00151	PDLIM1	435290	442046	477043	550638
O00154	ACOT7	665428	571549	776422	738025
O00159	MYO1C	541149	525314	475615	482921
O00161	SNAP23	588761	635753	489822	595235
O00165	HAX1	268318	280646	248190	260731
O00170	AIP	226471	218930	257636	239537
O00178	GTPBP1	83096.1	77386.6	92968.1	81297.6
O00180	KCNK1	92584.4	78720	93097.8	82534.1
O00186	STXBP3	418965	426683	358016	404467
O00189	AP4M1	64603.9	3967.08	24820.7	31138.9
O00192	ARVCF	4531.58	5276.28	3065.63	3302.43
O00193	SMAP	243376	227760	346650	287361
O00194	RAB27B	221401	196136	174248	185275
O00203	AP3B1	557630	525445	633741	609896
O00212	RHOD	125021	127390	85413	100620
O00213	APBB1	101586	104954	115414	115794
O00217	NDUFS8	1.93341e+06	1.95364e+06	1.75114e+06	1.89812e+06
O00220	TNFRSF10A	61486.3	61728.2	54027.7	62278.3
O00231	PSMD11	1.27877e+06	1.241e+06	1.44659e+06	1.45987e+06
O00232	PSMD12	393981	430406	450631	440719
O00233	PSMD9	314162	328371	322079	341914
O00244	ATOX1	196950	186043	248790	258009
O00255	MEN1	115228	128460	115049	111931
O00257	CBX4	129470	142667	123331	107555
O00258	GET1	109843	89119	105546	87712.6
O00264	PGRMC1	3.81299e+06	3.81707e+06	3.78695e+06	3.50186e+06
O00267	SUPT5H	390729	381155	386808	357434
O00268	TAF4	141631	146911	134599	139007
O00273	DFFA	110872	97817	129256	118309
O00287	RFXAP	14781.9	18015.9	18691.2	16484.5
O00291	HIP1	337714	346318	308090	332477
O00299	CLIC1	1.26204e+06	1.0767e+06	1.339e+06	1.29924e+06
O00303	EIF3F	1.08392e+06	1.0992e+06	1.15148e+06	1.27001e+06
O00308	WWP2	550970	545104	599542	533098
O00311	CDC7	110951	103417	83077.5	86878.6
O00327	ARNTL	17235.2	11066.9	11262.1	20188.9
O00330	PDHX	410419	420386	363986	383337
O00391	QSOX1	26843.5	26644.9	24062.9	25032.3
O00399	DCTN6	130419	137523	142691	136918
O00400	SLC33A1	176483	204917	208533	153071
O00401	WASL	118418	109966	125835	116216
O00410	IPO5	768110	740398	809916	807580
O00411	POLRMT	104053	101862	95727.7	95556.8
O00418	EEF2K	18231	18469.5	23765.7	21525.7
O00422	SAP18	1.09789e+06	1081069	1.03064e+06	1.08721e+06
O00423	EML1	24459.7	23300.4	21924.8	22073.1
O00425	IGF2BP3	582529	617429	571494	620561
O00429	DNM1L	364765	324716	432695	382433
O00442	RTCA	104282	84521.2	112843	100464
O00443	PIK3C2A	272590	294011	254210	262540
O00458	IFRD1	11616.8	10668.5	5990.68	9503.98
O00459	PIK3R2	34756.6	36075.4	53456	41330.4
O00461	GOLIM4	418211	443413	391348	406501
O00462	MANBA	67850.8	60299.3	57615.3	68191.5
O00468	AGRN	240591	240765	176962	212154
O00470	MEIS1	12105.4	12965.9	13431.7	14529
O00471	EXOC5	44193.4	48361.9	50731.1	55108.3
O00479	HMGN4	74569.5	42478.1	91776.4	83104.1
O00483	NDUFA4	2.98854e+06	2.84042e+06	3.50254e+06	2.78967e+06
O00487	PSMD14	1.06584e+06	1.09404e+06	1.11417e+06	1.21437e+06
O00488	ZNF593	182989	192029	184539	183536
O00499	BIN1	107807	109001	124145	126150
O00505	KPNA3	679521	682216	644778	678265
O00506	STK25	169187	163069	163931	184614
O00522	KRIT1	46729	47000	42130	46511.8
O00541	PES1	951660	831567	830304	793822
O00559	EBAG9	55975.4	61994.4	64669.2	46772.6
O00560	SDCBP	947262	1.03267e+06	815533	939909
O00562	PITPNM1	99763.4	105276	86897	86768.4
O00566	MPHOSPH10	215086	209998	178668	201145
O00567	NOP56	1.19089e+06	1.00545e+06	1.12652e+06	935276
O00571	DDX3X	5.23745e+06	5.36586e+06	4.95553e+06	5.64945e+06
O00584	RNASET2	106222	100538	97573.3	102519
O00592	PODXL	1.69403e+06	1.76424e+06	1.49743e+06	1.67218e+06
O00622	CCN1	25882.8	32356.9	32625.6	35260.4
O00623	PEX12	102984	90059.7	59166	75743.2
O00625	PIR	365688	305930	424664	386430
O00629	KPNA4	448315	463268	382741	456196
O00635	TRIM38	24422.9	30930.5	19814	23393.1
O00712	NFIB	52801.2	59631.5	51608.4	50453
O00743	PPP6C	202650	198253	213037	234687
O00748	CES2	58884.1	60478.6	65349.1	69683.9
O00750	PIK3C2B	89221.6	99425.9	98598.2	96586.1
O00754	MAN2B1	137805	129746	120623	125521
O00762	UBE2C	108758	105729	129293	136196
O00764	PDXK	502038	417494	589277	535837
O00767	SCD	895170	889453	857796	800166
O14494	PLPP1	42666.7	48336.7	45530.3	46808.1
O14495	PLPP3	92592.1	98450.6	64588.3	78008.7
O14497	ARID1A	80752.3	80868.2	71216.3	69805.8
O14519	CDK2AP1	619728	627860	566395	635007
O14521	SDHD	312274	329641	326789	308388
O14523	C2CD2L	47522.6	45942.9	45377.8	38011.4
O14524	NEMP1	108004	136837	129413	92794.3
O14530	TXNDC9	58515.4	53951.7	66483.8	55375.1
O14531	DPYSL4	436548	376984	453662	413786
O14545	TRAFD1	113513	107164	111687	112115
O14548	COX7A2L	551901	529515	515645	512766
O14561	NDUFAB1	949215	828756	767093	936545
O14562	UBFD1	121851	108264	135530	128576
O14569	CYB561D2	66713	64095.4	72106.8	54234.6
O14578	CIT	69809.2	76469.9	66684.7	67680.3
O14579	COPE	779139	851783	855544	837028
O14593	RFXANK	11042.2	12032	14581.1	11756.4
O14613	CDC42EP2	3138.07	14140.6	10222.5	19924.9
O14617	AP3D1	339352	342677	351317	340779
O14618	CCS	97789.2	92027.4	94646.5	96714.5
O14639	ABLIM1	98330.2	94347.7	98723.2	99483.9
O14640	DVL1	14594.2	14649.6	15198.7	15842.3
O14641	DVL2	61840.5	59838	53367.5	66422.1
O14646	CHD1	164748	164296	167634	163733
O14647	CHD2	135416	137955	124150	103451
O14653	GOSR2	235693	247961	221998	228636
O14656	TOR1A	169505	168662	147726	156322
O14657	TOR1B	177607	167241	174676	158094
O14662	STX16	253054	269328	240778	241955
O14672	ADAM10	505912	506658	468280	489838
O14681	EI24	299428	305644	306043	265882
O14683	TP53I11	73254.5	71143.6	73942.6	63715.1
O14684	PTGES	2.02763e+06	1.98363e+06	2.141e+06	1.62994e+06
O14686	KMT2D	28469.9	33348	28147.9	26875.3
O14713	ITGB1BP1	58157.7	56266.1	55368.9	48657.8
O14715	RGPD8	2.03478e+06	2.08709e+06	1.75128e+06	1.96344e+06
O14727	APAF1	9457.6	10113.1	9157.48	11702
O14730	RIOK3	66475.6	71190.4	75804.6	78622
O14732	IMPA2	174445	169998	217443	222515
O14733	MAP2K7	27413	20027.1	30556.2	24316.7
O14734	ACOT8	237988	243468	214738	231308
O14735	CDIPT	585720	710692	496057	466431
O14737	PDCD5	575384	595889	681423	685539
O14744	PRMT5	997771	1.00378e+06	1.106e+06	1.09065e+06
O14745	SLC9A3R1	798051	772645	786057	786972
O14757	CHEK1	44287.7	41080.9	52262.8	43179.3
O14763	TNFRSF10B	77935	80482.9	68667.4	76390.8
O14772	FPGT	14996.1	14721.4	20466.2	16347.5
O14773	TPP1	284527	283686	287824	317679
O14776	TCERG1	768044	829897	780699	805476
O14777	NDC80	40423.5	40717.4	46506.7	45131.8
O14786	NRP1	180153	191427	159037	167679
O14787	TNPO2	258200	262073	275306	265726
O14791	APOL1	25612.2	30235.3	32654.4	32953
O14795	UNC13B	65081.9	69470	57243.1	57228.3
O14802	POLR3A	96222.1	98571.4	97522.5	83673.9
O14817	TSPAN4	71390	73484.2	146402	315029
O14818	PSMA7	1.07479e+06	993393	1.21731e+06	1.22989e+06
O14828	SCAMP3	1.13016e+06	1.15976e+06	1.0274e+06	1.10627e+06
O14832	PHYH	90818.4	105934	94578.4	107243
O14841	OPLAH	23374.2	20270.8	28504.6	25208.5
O14867	BACH1	12851.2	11522.1	11943.2	11952.9
O14874	BCKDK	156079	161087	131463	141183
O14879	IFIT3	17236.5	18146	25095.2	18760.7
O14880	MGST3	3.27154e+06	3.00059e+06	3.17466e+06	3.40771e+06
O14893	GEMIN2	66608.7	69717.8	64893.1	66841.2
O14907	TAX1BP3	238407	236691	247697	250347
O14908	GIPC1	202467	204225	203578	217436
O14920	IKBKB	16548.8	15263.5	20758	17475.9
O14925	TIMM23	650036	672180	566307	612897
O14929	HAT1	451369	393511	553175	463444
O14933	UBE2L6	43779	37277.9	53582.3	52586.1
O14936	CASK	282859	278964	260358	286067
O14939	PLD2	54249.5	60908.1	60576.5	58521.2
O14949	UQCRQ	1.13304e+06	1.19047e+06	1.09494e+06	1.03611e+06
O14950	MYL12B	2.28791e+06	2.35983e+06	2.48246e+06	2.48325e+06
O14957	UQCR11	57670.1	50515.8	42916.9	53503.6
O14964	HGS	346473	351580	314502	342698
O14965	AURKA	305373	284421	302942	299273
O14966	RAB29	126379	132418	122142	114544
O14967	CLGN	195636	207230	203379	171243
O14972	VPS26C	35365.3	33947.9	41249.8	36089.4
O14974	PPP1R12A	342123	355870	324742	361368
O14975	SLC27A2	464802	445260	436329	384296
O14976	GAK	159667	181804	172504	177223
O14979	HNRNPDL	3.19282e+06	3.41846e+06	3.22987e+06	3.34796e+06
O14980	XPO1	807934	798392	840765	818382
O14981	BTAF1	46826.3	45698.1	54265	46259.7
O15013	ARHGEF10	36828.1	34225.5	46729.1	40636.4
O15014	ZNF609	69558.1	78745	67765.4	71154
O15020	SPTBN2	3.16435e+06	3304289	3.27003e+06	3.47082e+06
O15027	SEC16A	495155	532806	415241	464346
O15031	PLXNB2	798158	831085	633869	750186
O15033	AREL1	12638.1	13143.5	13623.4	12361.9
O15042	U2SURP	1.1017e+06	1.10351e+06	1.09848e+06	1.1173e+06
O15047	SETD1A	106872	116823	105452	107559
O15061	SYNM	87861.9	97816.2	82401.1	95889.3
O15066	KIF3B	73411.1	62927.5	90378.3	65338.1
O15067	PFAS	348928	301518	389251	384070
O15069	NACAD	46761.8	29418.7	74336.6	42943.8
O15084	ANKRD28	72875.4	76459.2	85232.7	86551.2
O15085	ARHGEF11	48870.6	55317.9	50824.6	51059.4
O15091	PRORP	246897	249570	234585	243708
O15111	CHUK	33804.7	35862.9	41761.6	34827.2
O15116	LSM1	148814	138216	127760	137030
O15118	NPC1	405482	427240	375041	388032
O15120	AGPAT2	229797	234113	212739	214119
O15121	DEGS1	161211	164805	160958	138638
O15126	SCAMP1	332012	343007	330214	318879
O15127	SCAMP2	166176	167874	136106	156779
O15131	KPNA5	179532	195438	194893	243197
O15143	ARPC1B	1.03309e+06	947006	953529	998184
O15144	ARPC2	703238	625891	671677	629308
O15145	ARPC3	897749	848910	828528	872119
O15155	BET1	263709	253769	322108	264709
O15156	ZBTB7B	38536.9	43035	36542.1	34257
O15160	POLR1C	766210	837610	702095	719880
O15162	PLSCR1	215892	218034	203660	292612
O15164	TRIM24	173292	170480	166159	176115
O15173	PGRMC2	1.70023e+06	1876945	1.67933e+06	1.53145e+06
O15182	CETN3	17540	9894.98	17656.4	31310.9
O15194	CTDSPL	34057.8	30513.7	33281.1	25793.3
O15212	PFDN6	379477	398208	441330	438038
O15213	WDR46	280863	237959	236193	214972
O15226	NKRF	585825	588659	522925	528447
O15228	GNPAT	144168	155407	123858	136459
O15230	LAMA5	230251	226603	189089	210252
O15231	ZNF185	125721	134139	124748	135389
O15234	CASC3	23730.8	31686.3	28637.6	33351.3
O15235	MRPS12	438149	413609	389954	395417
O15239	NDUFA1	213107	186929	180814	180085
O15243	LEPROT	188569	227271	165532	176402
O15254	ACOX3	148830	135740	135567	145457
O15258	RER1	773061	731542	694100	684693
O15260	SURF4	2.08183e+06	2.09432e+06	2.28094e+06	1.98346e+06
O15269	SPTLC1	567602	548736	495660	520834
O15270	SPTLC2	280094	300224	253354	264856
O15294	OGT	340177	345475	324190	352652
O15297	PPM1D	30686.7	26507.1	26788.6	25846.2
O15305	PMM2	334379	287084	355893	354938
O15318	POLR3G	16301.2	15322.2	16783.3	16141.5
O15321	TM9SF1	241833	260723	232970	231788
O15344	MID1	72078.9	71204.8	76772.3	77408.6
O15347	HMGB3	383959	386557	503847	487577
O15350	TP73	6873.88	8319.1	8487.15	8661.05
O15355	PPM1G	285401	266947	327672	308652
O15357	INPPL1	125967	117512	150361	143418
O15371	EIF3D	619978	619909	641080	690566
O15372	EIF3H	803208	841611	871700	922015
O15379	HDAC3	121799	128248	119239	127684
O15381	NVL	287126	303717	269769	294974
O15382	BCAT2	324317	333570	302802	324881
O15392	BIRC5	86466.3	86379	62866.7	95364.8
O15397	IPO8	137762	147420	164231	152442
O15400	STX7	942065	962387	839585	923399
O15403	SLC16A6	123010	143430	122823	123961
O15417	TNRC18	31939.9	31712.9	28197.9	27317
O15427	SLC16A3	2.01702e+06	2.2962e+06	1.81317e+06	1.65686e+06
O15431	SLC31A1	111184	129094	30444.6	111527
O15438	ABCC3	34999.6	38924	31186.2	31232
O15439	ABCC4	609834	610690	542986	570082
O15440	ABCC5	3.74845e+06	3.77299e+06	3.03977e+06	3.44546e+06
O15446	POLR1G	562532	590453	486888	491211
O15455	TLR3	83221.2	82611.9	82951.3	78079.8
O15460	P4HA2	351713	356703	335428	355866
O15479	MAGEB2	2.48227e+06	2.53818e+06	2.6e+06	2.5637e+06
O15484	CAPN5	67014.1	64936.4	61094.7	55329.2
O15498	YKT6	110309	112342	122633	111088
O15504	NUP42	125893	148239	138150	140678
O15511	ARPC5	953800	909484	922299	837214
O15514	POLR2D	282545	323532	272786	263585
O15516	CLOCK	25630.8	25512.8	20441.5	22038.3
O15525	MAFG	14903.7	15910.8	20109.5	15022.7
O15527	OGG1	37529.5	37073.4	38435.6	39211.6
O15530	PDPK1	14453.6	11513.1	16112.5	14279
O15533	TAPBP	1.12657e+06	1.17515e+06	1.09271e+06	1.01313e+06
O15541	RNF113A	74632.2	68669.9	93042.4	93516.2
O15550	KDM6A	20435.7	19143.6	16057	13583.2
O15551	CLDN3	226156	216132	251725	191585
O15554	KCNN4	59799.6	59965.6	56530.7	56124.8
O43143	DHX15	2.60478e+06	2.51538e+06	2.62532e+06	2.50406e+06
O43148	RNMT	516433	538456	500452	542310
O43149	ZZEF1	22709.2	21921.7	25324	24146.3
O43150	ASAP2	15342	13404.1	19079.3	17216.4
O43156	TTI1	435340	536444	498283	477445
O43157	PLXNB1	32987.2	39767.2	34047.3	40494.9
O43159	RRP8	356614	320740	319088	313888
O43164	PJA2	28587.5	31201.7	24816.2	29767.4
O43167	ZBTB24	6006.94	5937.3	4615.9	5182.99
O43169	CYB5B	5.85516e+06	6279403	5.54423e+06	5.39459e+06
O43172	PRPF4	637064	644317	538285	584236
O43175	PHGDH	2.08621e+06	1.93599e+06	2.01483e+06	2.0323e+06
O43181	NDUFS4	417170	425776	366974	398173
O43194	GPR39	81977.6	71533.2	88072.6	82933.7
O43237	DYNC1LI2	189388	185884	216710	201015
O43242	PSMD3	602409	601347	649664	627681
O43251	RBFOX2	245581	280121	257345	265356
O43252	PAPSS1	158879	146633	192234	178097
O43264	ZW10	424366	432250	426738	429764
O43278	SPINT1	134380	140570	126281	139844
O43290	SART1	505971	524416	435754	421254
O43292	GPAA1	442466	484438	456164	360154
O43293	DAPK3	98791.1	112846	109668	102204
O43298	ZBTB43	33728.7	31794.2	35917.4	32481.1
O43301	HSPA12A	21589.1	23750.5	28371.1	25723.5
O43306	ADCY6	76166.2	66650.8	63259.7	74548.1
O43307	ARHGEF9	8254.42	5600.76	10444.4	9414.91
O43314	PPIP5K2	68757.3	60361.4	82829.8	67608.8
O43318	MAP3K7	21231.5	25781	24101.7	25615.1
O43324	EEF1E1	955794	867042	1.02754e+06	1.03798e+06
O43325	LYRM1	20712.3	21985.3	17260.1	14511.3
O43379	WDR62	12023	16736.3	23358.1	22416.4
O43390	HNRNPR	6.40878e+06	6.59967e+06	6.25586e+06	5.6997e+06
O43395	PRPF3	413046	385828	381771	284015
O43396	TXNL1	508158	496786	565600	586953
O43399	TPD52L2	995319	985650	1.1973e+06	1.26064e+06
O43402	EMC8	401668	419922	360576	412388
O43414	ERI3	89447.9	80570	75757	89863.1
O43422	THAP12	40605.3	39148.7	44013	46598.3
O43426	SYNJ1	15068.5	18844.5	16975.8	17118.1
O43427	FIBP	59022.7	59160.1	50183.8	55568.7
O43432	EIF4G3	431730	441955	493752	470575
O43447	PPIH	388776	409039	400615	391391
O43462	MBTPS2	79480.2	86550.6	76196.8	68263
O43463	SUV39H1	58698.1	58875.1	51813.2	56941.8
O43464	HTRA2	655727	625581	539430	574637
O43482	OIP5	34928.4	30912.3	28058.8	26046.1
O43488	AKR7A2	345270	326233	371284	381491
O43491	EPB41L2	156467	150817	158562	162211
O43493	TGOLN2	146959	145260	127186	133025
O43502	RAD51C	9920.23	13067.4	17893.6	17699.4
O43504	LAMTOR5	643455	706334	608181	666582
O43505	B4GAT1	83940.7	90306.8	84172.7	79918.1
O43513	MED7	51079.5	56492.6	47316	53932.9
O43521	BCL2L11	28100.8	24451.2	26115.6	28517.6
O43567	RNF13	44104.6	52160.4	38533.8	50074.2
O43572	AKAP10	22538.7	18958.7	28790.9	29237.3
O43581	SYT7	14423.7	15489.9	9607.02	20807.5
O43583	DENR	327235	344840	447401	413202
O43592	XPOT	141525	132022	159249	143053
O43598	DNPH1	286329	269316	373461	330865
O43615	TIMM44	1.07116e+06	1.04596e+06	981679	996937
O43617	TRAPPC3	206193	218229	259728	224115
O43633	CHMP2A	167623	153737	156017	132645
O43653	PSCA	234548	224883	217464	237661
O43657	TSPAN6	454770	455872	397920	443818
O43660	PLRG1	803862	804756	725892	815589
O43663	PRC1	412647	419125	367873	350493
O43665	RGS10	34605.5	31772.5	43030.7	35165.8
O43670	ZNF207	934403	952615	978804	1.02506e+06
O43674	NDUFB5	677470	645200	622927	634739
O43676	NDUFB3	406021	412942	335984	382862
O43677	NDUFC1	14486.5	15489.9	118897	6.1884e+06
O43678	NDUFA2	667620	716245	608392	685407
O43681	GET3	934012	930649	952752	995626
O43683	BUB1	31063.5	32333.1	38764	38334.5
O43684	BUB3	1.47617e+06	1.61044e+06	1.46969e+06	1.62248e+06
O43688	PLPP2	449790	464628	336387	441479
O43707	ACTN4	4.89778e+06	4983623	4.98772e+06	5.72608e+06
O43708	GSTZ1	55127.7	61092.4	49120.7	49290.8
O43709	BUD23	364181	352994	385707	360358
O43715	TRIAP1	209957	219250	149209	159497
O43716	GATC	120903	115128	108355	117541
O43719	HTATSF1	805115	858461	712336	730918
O43731	KDELR3	207359	230776	212170	197049
O43739	CYTH3	69060.3	70785.2	77066.4	71138.1
O43741	PRKAB2	24828	24921.6	21022.9	26654.6
O43747	AP1G1	434162	451380	424947	444885
O43752	STX6	227509	220271	178342	218219
O43759	SYNGR1	346004	379156	322613	318072
O43760	SYNGR2	5.46861e+06	5.73538e+06	4.31188e+06	5.35677e+06
O43765	SGTA	295376	280898	304342	317028
O43766	LIAS	73331.1	80514.8	85531.6	80866.6
O43768	ENSA	258101	198403	217828	243767
O43772	SLC25A20	862892	869633	832290	806155
O43776	NARS1	672105	710711	789184	806097
O43791	SPOP	20496.8	21519.1	18475	20826
O43795	MYO1B	230300	214976	195413	194972
O43805	SSNA1	27045.5	30220.2	40761.8	38635.8
O43808	SLC25A17	196360	220996	171905	147473
O43809	NUDT21	1.26429e+06	1323578	1.25432e+06	1.26941e+06
O43813	LANCL1	1.34613e+06	1.15332e+06	1.39886e+06	1.41148e+06
O43815	STRN	362875	376989	335369	384669
O43818	RRP9	686407	704407	591255	646901
O43819	SCO2	448295	401096	381086	402236
O43823	AKAP8	364302	409258	365200	401443
O43824	GTPBP6	58773.3	59120.5	56167.7	55746.6
O43826	SLC37A4	135915	130411	133655	109157
O43837	IDH3B	1.05011e+06	1.07093e+06	956999	1.03229e+06
O43847	NRDC	275873	259636	289897	283392
O43852	CALU	2.43727e+06	2.55183e+06	2.41209e+06	2.56866e+06
O43865	AHCYL1	869233	887101	701291	846795
O43896	KIF1C	26778.9	27893	29190.3	32246.8
O43897	TLL1	1711.58	3424.92	946.294	4052.12
O43900	PRICKLE3	32453.7	33879.1	26536.5	28509.4
O43909	EXTL3	36211.4	40434.3	32152.2	32375.7
O43913	ORC5	162880	159501	141196	132760
O43920	NDUFS5	1.27292e+06	1293797	1.0884e+06	1.21792e+06
O43924	PDE6D	80098.4	68671.5	78157.9	75999.1
O43929	ORC4	136297	137246	124628	119231
O43933	PEX1	296030	304282	295814	291992
O60216	RAD21	966867	1.05793e+06	949904	1.01485e+06
O60220	TIMM8A	883336	908463	689141	815161
O60229	KALRN	22868.3	13350.2	29845.6	16791.2
O60231	DHX16	434893	404707	417599	381214
O60232	ZNRD2	273553	285170	299289	308886
O60237	PPP1R12B	10190.4	10724.3	9627.57	9374.74
O60238	BNIP3L	16309.9	19876.4	26955.4	17972.6
O60244	MED14	168456	179317	156449	155574
O60256	PRPSAP2	102889	99680.9	118871	116415
O60262	GNG7	51641	49486.5	39138.2	40486.7
O60264	SMARCA5	1.32226e+06	1.23014e+06	1.25901e+06	979990
O60266	ADCY3	154216	160860	149365	149696
O60271	SPAG9	214832	212052	243336	239015
O60287	URB1	291491	306848	265391	244077
O60291	MGRN1	292065	287684	280586	309054
O60292	SIPA1L3	27304.4	29653.2	27002	25143.7
O60293	ZFC3H1	110575	118093	109277	69223
O60294	LCMT2	25082.6	26873.8	24905.7	22585.6
O60306	AQR	707695	762332	653488	683109
O60307	MAST3	295339	320858	335268	366575
O60313	OPA1	659046	697487	586422	665693
O60318	MCM3AP	148284	153601	136118	127406
O60333	KIF1B	88305.4	95412.6	87711.1	77574.8
O60337	MARCHF6	80297.3	84400.6	71758.7	63768.8
O60341	KDM1A	458135	476110	448233	463471
O60343	TBC1D4	37549	36186.4	42079.1	39116
O60353	FZD6	94668	98325.3	78377.7	91730.8
O60427	FADS1	310444	299856	285955	250650
O60437	PPL	629984	660477	565502	643017
O60443	GSDME	64625.8	59117	70860.6	60308.2
O60462	NRP2	118685	140608	94271.8	123055
O60476	MAN1A2	121529	132919	114644	121842
O60487	MPZL2	127482	128123	112287	130554
O60488	ACSL4	963326	935700	843672	900286
O60493	SNX3	425826	360787	451944	460770
O60499	STX10	213379	216835	198458	211104
O60502	OGA	290505	263680	330487	327462
O60503	ADCY9	123779	137114	97847.9	115296
O60504	SORBS3	695561	710718	826969	861921
O60506	SYNCRIP	2.23968e+06	2.38543e+06	2.20722e+06	2.19401e+06
O60507	TPST1	15050.3	22918.8	24481.4	17803.8
O60508	CDC40	246762	268558	266119	277459
O60512	B4GALT3	23751.2	22562.6	28705.3	23615.4
O60518	RANBP6	375012	369298	347304	361102
O60524	NEMF	62122.9	62851.3	71075.2	53618.9
O60547	GMDS	180699	164120	203886	186059
O60563	CCNT1	167774	167936	170984	175144
O60566	BUB1B	400927	408977	439008	463885
O60568	PLOD3	1.99544e+06	1.96506e+06	1.77043e+06	2.00061e+06
O60573	EIF4E2	346375	370447	338580	388104
O60583	CCNT2	50385.6	54473.1	51432.5	50672.1
O60610	DIAPH1	480602	464586	487825	498833
O60613	SELENOF	456165	479679	416574	470863
O60636	TSPAN2	16172.2	16973.4	16473.5	15501.6
O60637	TSPAN3	268171	273008	242232	263482
O60645	EXOC3	65289.3	64078.1	71616.9	62055.2
O60658	PDE8A	90495.6	93199.2	76083.6	85656.6
O60664	PLIN3	968412	893461	1.00307e+06	1.02948e+06
O60669	SLC16A7	82531.3	94755.3	63450.7	79148
O60671	RAD1	20188.7	24091.2	22765.8	21626.2
O60675	MAFK	18032.6	18391.4	24833.9	12056.8
O60678	PRMT3	135715	120799	155728	144041
O60683	PEX10	121698	123525	87915.8	93919.1
O60684	KPNA6	3.10279e+06	3.31587e+06	2.94206e+06	3.04457e+06
O60701	UGDH	1.12674e+06	988213	1.22296e+06	1.17812e+06
O60704	TPST2	47839.4	48354.8	57355.6	37485.3
O60716	CTNND1	370278	370812	349240	388118
O60725	ICMT	140563	157327	144809	122484
O60739	EIF1B	444923	453728	501526	456991
O60749	SNX2	329490	289919	370698	354331
O60762	DPM1	1.10666e+06	1.00812e+06	1.09453e+06	982522
O60763	USO1	972123	1.02428e+06	1.08897e+06	1.18077e+06
O60779	SLC19A2	70181.6	83105.2	73051.5	74682.9
O60783	MRPS14	223511	212794	211109	201747
O60784	TOM1	172323	175884	176448	184203
O60814	H2BC12	1.2711e+08	124731408	1.13214e+08	1.10695e+08
O60825	PFKFB2	340247	310941	347439	340908
O60826	CCDC22	101268	105778	125555	119002
O60828	PQBP1	760632	821959	814646	913566
O60830	TIMM17B	584635	558801	527358	623981
O60831	PRAF2	817800	866601	797937	718891
O60832	DKC1	701968	628719	661665	630007
O60841	EIF5B	452781	473262	487558	502749
O60869	EDF1	1.67779e+06	1.72177e+06	1.78569e+06	2.0743e+06
O60870	KIN	239499	227760	229501	229661
O60884	DNAJA2	758173	797534	811823	837853
O60885	BRD4	2.17128e+06	2.2733e+06	1.89467e+06	2.05138e+06
O60888	CUTA	217320	187945	234375	240921
O60907	TBL1X	324094	352408	347069	346908
O60911	CTSV	31662.1	33606	29049.2	22969.8
O60921	HUS1	38353.2	43724.9	49552.5	41140.6
O60925	PFDN1	359265	351477	422049	437646
O60927	PPP1R11	12076.3	4783.59	3680.09	4097.64
O60930	RNASEH1	132064	136372	116439	166173
O60934	NBN	138602	140651	127708	126695
O60936	NOL3	79668.6	76541.4	86336.6	86139.7
O60941	DTNB	72437.1	72861.3	55667.7	68331.9
O60942	RNGTT	68656.8	66793.7	74356.9	69112.1
O75027	ABCB7	413276	437379	436358	421425
O75030	MITF	59816.1	64226.8	75100.2	74576.8
O75051	PLXNA2	19539.7	18008.6	23805.4	21691.4
O75052	NOS1AP	93292.1	88922.5	78314.9	91769.5
O75054	IGSF3	87561.7	90182.5	74316	79171.2
O75063	FAM20B	135853	136869	123358	122133
O75083	WDR1	1.22142e+06	1109447	1.29551e+06	1.28823e+06
O75110	ATP9A	403511	398515	392368	395985
O75116	ROCK2	447865	436842	516496	503058
O75122	CLASP2	84121.5	84166.3	86930.7	76326.2
O75127	PTCD1	193994	201266	178407	189925
O75128	COBL	102195	96999.6	91803.4	89451.2
O75131	CPNE3	2.93514e+06	2.98247e+06	2.6552e+06	2.92288e+06
O75143	ATG13	16588.8	19037.6	21730.8	19035.2
O75146	HIP1R	95349.2	108058	95984.4	101744
O75147	OBSL1	89246.4	93452.7	85437.9	100279
O75150	RNF40	134110	138852	141609	143044
O75151	PHF2	749189	636684	632129	412713
O75152	ZC3H11A	446232	457809	443754	397800
O75153	CLUH	318683	342516	337057	353686
O75157	TSC22D2	96386.3	85149.4	94598.6	89461.4
O75164	KDM4A	45462.3	45059.6	47015.8	43322.2
O75165	DNAJC13	196143	206833	179242	186255
O75170	PPP6R2	41191	50357.6	54598.5	48492.2
O75175	CNOT3	140967	136290	161283	164211
O75177	SS18L1	6978.35	5755.54	4214.71	6104.61
O75179	ANKRD17	191422	204863	187123	203181
O75182	SIN3B	101462	98512.6	101341	96697.5
O75190	DNAJB6	87561.3	91739.9	90067.1	103457
O75197	LRP5	20349.1	21064.6	14592	17566.6
O75208	COQ9	328442	324034	291973	324298
O75223	GGCT	229577	221111	271416	278124
O75251	NDUFS7	1.23644e+06	1.26911e+06	1.22044e+06	1.19185e+06
O75306	NDUFS2	1.69248e+06	1.67102e+06	1.59528e+06	1.63071e+06
O75312	ZPR1	91998.9	81350.4	99208	102482
O75317	USP12	14801	15380.2	11833.7	7235.67
O75319	DUSP11	69537.9	71606.5	63066.6	64240.7
O75323	NIPSNAP2	689800	693794	630563	674315
O75330	HMMR	44069	43646.4	48814.1	45599.4
O75340	PDCD6	2.75648e+06	2.87146e+06	2.7576e+06	2.87771e+06
O75347	TBCA	642136	554844	684031	625998
O75348	ATP6V1G1	836835	822949	599697	695396
O75351	VPS4B	123503	119451	127229	125194
O75352	MPDU1	816402	844959	811770	668950
O75356	ENTPD5	18815.2	18886.3	23353.8	13496.2
O75362	ZNF217	31357.4	34408.6	31338.2	28094.7
O75367	MACROH2A1	5.08755e+06	4.22296e+06	4.5114e+06	4.30149e+06
O75368	SH3BGRL	264415	230324	269950	283490
O75369	FLNB	1.58264e+06	1.67376e+06	1.81744e+06	1.88458e+06
O75376	NCOR1	110835	117572	108889	107649
O75379	VAMP4	63026.2	70925.4	68685.3	66087.1
O75380	NDUFS6	620195	630429	532845	575031
O75381	PEX14	370835	397896	335789	346105
O75382	TRIM3	151771	164715	142100	150369
O75385	ULK1	5168.81	3137.32	7445.47	6810.76
O75390	CS	4.36881e+06	4.16209e+06	4.2901e+06	4.41428e+06
O75391	SPAG7	101231	81271.2	117254	111192
O75394	MRPL33	178587	178902	163426	192970
O75396	SEC22B	7.34618e+06	6940534	7.20914e+06	6.19932e+06
O75400	PRPF40A	632434	646092	545159	623774
O75410	TACC1	280717	274057	266269	291108
O75414	NME6	199135	220168	201908	189733
O75419	CDC45	103022	106297	115155	98322.5
O75420	GIGYF1	20399.7	20544.8	25503	18864.4
O75425	MOSPD3	14335.2	23140.7	14310.9	11410.7
O75427	LRCH4	78504.7	77444.8	75333.5	74277.9
O75431	MTX2	531848	527004	476501	514910
O75436	VPS26A	852517	844791	1.0012e+06	883528
O75438	NDUFB1	991560	937177	892429	923329
O75439	PMPCB	1.77333e+06	1.74135e+06	1.53098e+06	1.67876e+06
O75446	SAP30	119103	118640	91195.9	111841
O75448	MED24	127200	138380	121333	118767
O75449	KATNA1	34083.8	32998.2	31989.4	36652.8
O75462	CRLF1	79799.8	9413.11	280948	15798.9
O75475	PSIP1	1.3766e+06	1.30005e+06	1.26442e+06	1.16169e+06
O75477	ERLIN1	444956	457032	433077	365604
O75486	SUPT3H	18768	29768.6	28864.8	18899.8
O75489	NDUFS3	1.71988e+06	1626634	1.51197e+06	1.63293e+06
O75494	SRSF10	2.59055e+06	2.5429e+06	2.74055e+06	2.82761e+06
O75496	GMNN	70959.8	64102	88311.2	63518.2
O75503	CLN5	30381.5	29128.4	25514.7	25362.9
O75506	HSBP1	245884	248013	253542	266948
O75521	ECI2	699720	695470	612554	650680
O75528	TADA3	26823.1	27943.4	28340	22645.6
O75529	TAF5L	55003.7	55059.6	41703.8	43252.8
O75530	EED	280911	271236	258943	263462
O75531	BANF1	2.14e+06	2.24985e+06	2.3598e+06	2.50611e+06
O75533	SF3B1	1.91255e+06	1.95807e+06	1.84954e+06	1.88636e+06
O75534	CSDE1	961233	1.06289e+06	1.07756e+06	1.21853e+06
O75554	WBP4	178401	178129	129775	127734
O75558	STX11	18676.2	18606.5	16397.1	16727.4
O75569	PRKRA	189036	215539	197016	228939
O75570	MTRF1	21270.5	20745.3	22497.6	18666.5
O75575	CRCP	9920.1	42294.1	12207.1	4600.76
O75581	LRP6	12877.4	14957.8	12790.3	10029.6
O75586	MED6	81318	82741.3	72041.7	63120.7
O75592	MYCBP2	109798	119054	111542	104778
O75600	GCAT	248206	253351	212755	237839
O75607	NPM3	1.5823e+06	1.59185e+06	1.62022e+06	1.57599e+06
O75608	LYPLA1	486649	425822	461969	463688
O75616	ERAL1	209836	210635	178371	208902
O75629	CREG1	207561	176181	199103	227092
O75635	SERPINB7	130144	114966	112526	111986
O75643	SNRNP200	1.30545e+06	1.34554e+06	1.24514e+06	1.27325e+06
O75648	TRMU	42017	42419.5	41165.9	44828.2
O75663	TIPRL	116656	103011	120535	115735
O75665	OFD1	52287.7	60165.6	55285.2	61372.4
O75674	TOM1L1	29256.4	29012.1	29775.2	25294.7
O75676	RPS6KA4	11006.7	12548.6	15604.2	14708.9
O75683	SURF6	370783	399629	351996	404353
O75688	PPM1B	53461.5	45054.2	48876.1	53990
O75691	UTP20	397294	394249	369770	298065
O75694	NUP155	750473	761640	691538	749073
O75695	RP2	537489	556176	466077	527373
O75717	WDHD1	141222	141258	151118	149287
O75718	CRTAP	1.03702e+06	985205	936915	953748
O75746	SLC25A12	1.50418e+06	1.54985e+06	1.42499e+06	1.42542e+06
O75764	TCEA3	36804.8	33171.4	39979.4	34834.2
O75781	PALM	468796	466095	435487	483511
O75787	ATP6AP2	520697	525016	543075	505957
O75792	RNASEH2A	71810.9	74410.7	91035.1	78805.5
O75794	CDC123	221096	208641	236843	239865
O75815	BCAR3	29751.5	29389.2	46626.7	39644.8
O75817	POP7	246324	183116	175801	172938
O75818	RPP40	187745	186530	194844	183124
O75821	EIF3G	1.18029e+06	1.21997e+06	1.27635e+06	1.38117e+06
O75822	EIF3J	853936	893908	864048	970701
O75828	CBR3	472667	433425	499747	465848
O75832	PSMD10	117220	97713.9	122302	121703
O75843	AP1G2	82380.6	99626.5	114403	136879
O75844	ZMPSTE24	714992	753289	734548	647266
O75874	IDH1	944013	859472	1.06656e+06	1.04774e+06
O75879	GATB	247365	237030	203129	244258
O75880	SCO1	468518	441215	431379	467530
O75882	ATRN	30337.1	30913.7	28415.6	33397.7
O75884	RBBP9	15187.9	10601.6	13869.5	14798.7
O75886	STAM2	64951.6	62003.7	60562.4	64115
O75891	ALDH1L1	50783.6	49843.1	44486.4	58432.3
O75896	TUSC2	14561.5	6398.64	45118.6	49908.6
O75901	RASSF9	148177	137048	120256	152556
O75907	DGAT1	81969.8	83167.9	81044.8	71528.1
O75909	CCNK	198989	212141	194826	193249
O75911	DHRS3	303696	314339	290109	289096
O75915	ARL6IP5	2.22594e+06	2.12743e+06	2.11534e+06	1.93494e+06
O75925	PIAS1	11140.8	13401.1	14233	11230.2
O75928	PIAS2	51262.7	56622.4	58424.1	49654.7
O75934	BCAS2	281120	326457	312238	306945
O75935	DCTN3	268112	264846	315958	300308
O75937	DNAJC8	198186	190710	243548	236056
O75940	SMNDC1	345060	350099	344651	384905
O75947	ATP5PD	2.84928e+06	3.08671e+06	2.72627e+06	3.01955e+06
O75954	TSPAN9	35666	31248.2	31077.8	25900.3
O75955	FLOT1	1.27787e+06	1.3357e+06	1.16303e+06	1.31177e+06
O75962	TRIO	23337.9	20739.3	26049.4	22140.6
O75964	ATP5MG	3.35353e+06	3294359	3.32643e+06	3.47115e+06
O75970	MPDZ	64532.9	64231.8	60315.4	68123.2
O75973	C1QL1	43837.3	49661.7	51391.1	46880.3
O75976	CPD	286495	283650	265282	262694
O76003	GLRX3	680872	610953	778826	780628
O76021	RSL1D1	2.42402e+06	1.71207e+06	1.99787e+06	2.17318e+06
O76024	WFS1	363398	374321	348907	307668
O76027	ANXA9	1470.37	1322.49	2005.27	2157.15
O76031	CLPX	858855	877340	762465	865234
O76041	NEBL	12017.3	13666.8	15730.9	18833.9
O76062	TM7SF2	87401.2	75450.2	122069	65945.4
O76071	CIAO1	173322	166802	193239	209756
O76075	DFFB	15365.3	8356.75	23391.5	15668.3
O76076	CCN5	46574.4	46902.8	48374.5	39705.4
O76080	ZFAND5	9036.6	9162.94	9161.87	15955.7
O76082	SLC22A5	187737	195025	178067	176497
O76087	GAGE7	282997	293003	279373	298976
O76094	SRP72	716815	744017	675444	755681
O76095	JTB	432706	497871	365329	433083
O77932	DXO	19817.2	17013.1	27268.2	26546.5
O94760	DDAH1	138014	126740	167060	154135
O94761	RECQL4	18506.8	17694	15268.5	12847.3
O94762	RECQL5	468257	508317	528090	465831
O94763	URI1	91225.8	92083.7	100612	105317
O94766	B3GAT3	149027	167220	136762	149083
O94776	MTA2	929952	970787	940352	842217
O94782	USP1	35490.4	34499	37025.6	38523.1
O94804	STK10	69306.3	71675.4	76436.9	85909.1
O94806	PRKD3	288811	288901	213658	228544
O94808	GFPT2	359712	340799	433296	340731
O94817	ATG12	38908	32130.6	35267.2	53304.6
O94822	LTN1	120772	142119	145462	136240
O94826	TOMM70	2.1163e+06	2.15822e+06	1.91051e+06	2.02019e+06
O94830	DDHD2	18216	15972.2	25091.1	25806
O94832	MYO1D	41277.6	41164.2	34194.1	34723
O94842	TOX4	274886	313220	277849	296317
O94851	MICAL2	42930.6	39075.3	37878.7	37322.2
O94855	SEC24D	166919	173815	185778	198143
O94864	SUPT7L	83075	85139.2	81485.1	80908.5
O94874	UFL1	622787	640814	558937	618839
O94875	SORBS2	206760	214793	215376	219054
O94880	PHF14	200339	215364	170472	187699
O94886	TMEM63A	130239	138880	138433	127940
O94887	FARP2	28578.1	25641.3	25137.8	26765.1
O94888	UBXN7	94539.6	87720.9	117022	109590
O94898	LRIG2	17417.8	16689.1	19345.3	17580.5
O94901	SUN1	207257	217207	225847	162335
O94903	PLPBP	165348	147524	171721	189082
O94905	ERLIN2	1.13901e+06	1.12988e+06	1.09715e+06	1.06057e+06
O94906	PRPF6	1.09214e+06	1.06162e+06	966881	952923
O94907	DKK1	81756.7	77089.6	77194.8	85507.2
O94910	ADGRL1	29405.5	26833.9	19276.4	22000.7
O94913	PCF11	122000	123671	110078	112373
O94915	FRYL	40795.3	44850	48779.3	48047.8
O94916	NFAT5	84284.2	82230.6	65983.2	72478.2
O94919	ENDOD1	134132	151551	146152	136274
O94923	GLCE	76825.9	81343	71714.1	79345
O94925	GLS	1.06766e+06	1.0423e+06	924729	1.04596e+06
O94927	HAUS5	46142.1	44218	52225.3	47983.8
O94952	FBXO21	27312	28569.1	29863.8	29037
O94953	KDM4B	123567	128784	122918	109139
O94955	RHOBTB3	32442.5	33994.5	25414	27835.7
O94964	SOGA1	16480.7	15698.4	13860.4	12826.8
O94966	USP19	124274	129042	129826	124376
O94967	WDR47	15081.1	16370.4	21691.4	20867.5
O94973	AP2A2	172432	172596	161303	157903
O94979	SEC31A	834990	867164	935157	937523
O94992	HEXIM1	356628	400107	393810	416167
O95045	UPP2	7543.66	1784.01	11254.3	7019.48
O95049	TJP3	65420.2	73581.8	69882.5	62552.4
O95059	RPP14	37552.2	36095.3	35013.2	40648.2
O95067	CCNB2	66224.4	62787.4	68759.1	67422.6
O95070	YIF1A	321982	336778	328512	322698
O95071	UBR5	208557	225937	220492	218114
O95081	AGFG2	88481.4	73503	97049.8	89900.8
O95084	PRSS23	27582.2	25742.8	27289.6	29243.9
O95104	SCAF4	176283	167251	140252	151778
O95139	NDUFB6	557628	582779	576492	520760
O95140	MFN2	230821	237860	210672	223561
O95149	SNUPN	51466.7	54719.8	52504.1	52218.3
O95155	UBE4B	96482.2	94094.8	104974	100478
O95159	ZFPL1	305426	290685	238200	289022
O95163	ELP1	139669	136279	159755	157402
O95164	UBL3	81210.2	87327.8	79169.1	86175.5
O95166	GABARAP	50963.7	40046.1	54933.1	50414.2
O95167	NDUFA3	740687	807496	696020	740125
O95168	NDUFB4	887345	777095	826515	835151
O95169	NDUFB8	543899	580687	570099	604694
O95182	NDUFA7	377316	370699	347251	380196
O95197	RTN3	2.14221e+06	2.17761e+06	2.08661e+06	2.11922e+06
O95202	LETM1	1.23903e+06	1305930	1.24397e+06	1.28751e+06
O95206	PCDH8	8998.66	24250.6	27839.9	30366.9
O95208	EPN2	114423	109978	102591	114982
O95210	STBD1	108494	107861	105731	100929
O95214	LEPROTL1	103779	121455	85793.8	97035.4
O95218	ZRANB2	699284	749917	730347	745909
O95219	SNX4	76061.1	68784.9	80734.3	80867.8
O95229	ZWINT	8386.05	8533.53	11620.1	14271.7
O95232	LUC7L3	663172	660282	640632	650960
O95235	KIF20A	163668	165389	147481	155562
O95238	SPDEF	11890.1	8736.34	14306.6	11905.9
O95239	KIF4A	179607	188682	167775	144191
O95243	MBD4	37224.4	37161.4	37617.5	29565.8
O95248	SBF1	59101.5	63556.1	61965.8	47497.7
O95249	GOSR1	226151	234329	203383	232598
O95251	KAT7	164940	162360	149464	150856
O95260	ATE1	35571.7	30523.8	36565.8	34347.7
O95273	CCNDBP1	18617.4	12324.4	21486.6	14227
O95274	LYPD3	461197	434356	320453	385943
O95292	VAPB	861289	849256	854224	799637
O95295	SNAPIN	142216	133256	161811	146774
O95297	MPZL1	636248	680054	560920	604110
O95298	NDUFC2	652905	622534	645192	593546
O95299	NDUFA10	1.11556e+06	1.0875e+06	941876	1.00981e+06
O95302	FKBP9	1.44705e+06	1.49399e+06	1.30354e+06	1.44485e+06
O95319	CELF2	151183	168230	138963	145687
O95336	PGLS	445555	401927	456595	445362
O95340	PAPSS2	130957	128658	159251	153492
O95347	SMC2	430031	440936	454084	453271
O95352	ATG7	94350.3	82671.8	97810.5	93260.6
O95359	TACC2	61913.4	62135.3	72434.3	71709.7
O95361	TRIM16	58101.6	53217.4	63928.3	62273.1
O95363	FARS2	118860	122403	112052	112081
O95365	ZBTB7A	80657.1	82685.2	67365.9	70462.7
O95372	LYPLA2	188139	161627	183913	176919
O95373	IPO7	1.47297e+06	1491160	1.56242e+06	1.56109e+06
O95376	ARIH2	82023.9	74831.8	91126.7	80344.9
O95379	TNFAIP8	1.98263e+06	1742849	1.68929e+06	1.59277e+06
O95391	SLU7	182354	214002	181794	221450
O95394	PGM3	251334	232764	291535	264887
O95396	MOCS3	31594.3	24981.6	30872.8	31488.6
O95397	PLEKHA8P1	9708.09	1801.87	9778.64	8427.2
O95400	CD2BP2	589589	633392	534702	606282
O95402	MED26	76109.3	80294.6	75352.5	66075
O95405	ZFYVE9	27853	35881.2	33199.8	40028.5
O95406	CNIH1	74164.6	88759.1	70029.2	47398.4
O95415	BRI3	30975.8	39833.5	31506.9	46524.4
O95425	SVIL	124151	120360	122181	118610
O95429	BAG4	62738.9	67477.6	66765.2	68628.4
O95433	AHSA1	627341	555925	698676	654282
O95453	PARN	201523	207125	199671	216565
O95456	PSMG1	299155	273540	333388	334631
O95466	FMNL1	63821.5	62541.5	65770.1	62100.9
O95470	SGPL1	319423	309751	310794	262055
O95471	CLDN7	58944.8	48645.2	42607.8	53221.6
O95476	CTDNEP1	68167.7	67976.8	73549.9	76231
O95478	NSA2	1.11599e+06	1.0879e+06	1.05142e+06	1.08792e+06
O95479	H6PD	57322.8	54951.6	54573.2	54661.5
O95486	SEC24A	203468	200324	229081	233877
O95487	SEC24B	324525	340019	323077	324871
O95544	NADK	60384.2	61000.6	69292	65443.6
O95551	TDP2	22687.6	21873.9	27901	28221.5
O95562	SFT2D2	202774	268418	194694	278298
O95563	MPC2	504114	545072	529968	460633
O95571	ETHE1	1.45301e+06	1.53027e+06	1.35429e+06	1.41053e+06
O95573	ACSL3	1.71757e+06	1.68604e+06	1.6118e+06	1.53634e+06
O95602	POLR1A	472995	499792	426002	405556
O95613	PCNT	816962	791032	760444	772267
O95619	YEATS4	114314	107800	117558	105646
O95625	ZBTB11	129835	104497	131195	95151.1
O95628	CNOT4	15299.3	14702.6	22178.2	13331.5
O95630	STAMBP	88135.4	84016.8	72702.6	85160.8
O95633	FSTL3	99895.9	104316	89241	103637
O95639	CPSF4	600165	650160	592476	656365
O95671	ASMTL	31038.1	27745.2	26785.5	29560.9
O95674	CDS2	128512	132463	117195	107949
O95684	CEP43	50757.2	50253.9	70797.9	56706.2
O95685	PPP1R3D	54375.6	53170.6	63705.8	63794.9
O95696	BRD1	61773.2	65784.7	52519.1	49652.3
O95707	POP4	76820.4	72968.3	71682.2	72451.1
O95714	HERC2	60000.8	65228.7	55325.1	54306.3
O95716	RAB3D	482012	468939	456048	492535
O95721	SNAP29	359179	402618	325271	364382
O95747	OXSR1	235191	208126	253498	239052
O95749	GGPS1	15696.8	18019.3	5995.94	11784.9
O95757	HSPA4L	775023	776234	953661	937760
O95758	PTBP3	339654	358452	333046	351337
O95772	STARD3NL	78380.8	93762.6	77762	68922.5
O95777	LSM8	926091	956095	975381	998435
O95780	ZNF682	3852.12	7171.92	6467.56	10924.9
O95782	AP2A1	849349	870542	827829	831918
O95785	WIZ	4.32187e+06	4.57441e+06	3.93685e+06	3.86679e+06
O95793	STAU1	84134.4	86647.9	82107.7	84062.6
O95801	TTC4	106165	94628.6	126605	119677
O95807	TMEM50A	96128.9	106190	93526.3	90741
O95816	BAG2	1.05461e+06	1.10334e+06	938430	1.07775e+06
O95817	BAG3	178926	191122	188502	213759
O95819	MAP4K4	132431	139040	148987	153892
O95822	MLYCD	115846	112260	100306	101081
O95825	CRYZL1	45356	39467.8	50166.7	49542.3
O95831	AIFM1	2.94187e+06	2873609	2.64431e+06	2.8067e+06
O95832	CLDN1	124303	130642	92757.7	107877
O95834	EML2	207496	192674	229271	225992
O95857	TSPAN13	322703	322449	277091	293637
O95858	TSPAN15	49697.9	49568.8	47654.4	62268.7
O95861	BPNT1	280827	245687	292696	276743
O95865	DDAH2	140370	122539	146684	149495
O95870	ABHD16A	281418	298134	270737	250963
O95873	C6orf47	89159.4	86225.3	87599.1	86538.3
O95881	TXNDC12	826227	927771	916579	985634
O95900	TRUB2	128855	125468	110178	119497
O95905	ECD	30238.8	30170.2	41639.4	38438.9
O95926	SYF2	113563	113668	102448	124156
O95983	MBD3	223921	255642	219457	258303
O95985	TOP3B	103860	103570	106364	100559
O95989	NUDT3	73955.5	58809.4	84439.8	80444
O95994	AGR2	278807	289237	289830	306408
O95997	PTTG1	39336.9	39820.1	48478.4	46268.9
O95999	BCL10	58300.6	53358.4	109138	53034.6
O96000	NDUFB10	2.27759e+06	2.32146e+06	2.01461e+06	2.2626e+06
O96005	CLPTM1	733100	757759	766317	680513
O96006	ZBED1	21150.2	13220.2	25503.9	20375
O96007	MOCS2	20603.9	11573.8	26195.4	22397.1
O96008	TOMM40	2.4535e+06	2.59842e+06	2.34373e+06	2.48272e+06
O96011	PEX11B	151287	210888	163059	163526
O96013	PAK4	27941.6	28165.3	28723.9	27118.1
O96017	CHEK2	18306.8	11552.8	23984.3	20787.3
O96019	ACTL6A	664976	693169	611638	654751
O96020	CCNE2	15259.7	6613.88	17054.7	13499.7
O96028	NSD2	336478	310832	277467	293709
O96033	MOCS2	45009.9	46882.6	53927.1	41482.4
P00156	MT-CYB	279866	430669	238161	335032
P00167	CYB5A	843457	814010	759166	800099
P00338	LDHA	1.52883e+07	13483202	1.81233e+07	1.67339e+07
P00367	GLUD1	1.20907e+06	1.21022e+06	1.12568e+06	1.2022e+06
P00374	DHFR	147679	137462	191709	157934
P00387	CYB5R3	1.93156e+06	1.88048e+06	1.76698e+06	1.75579e+06
P00390	GSR	409107	397291	405758	416143
P00395	MT-CO1	139504	160652	165475	198047
P00403	MT-CO2	2.3709e+06	2.50585e+06	2.35706e+06	2.29618e+06
P00414	MT-CO3	110557	124975	178757	132659
P00441	SOD1	871528	746568	909463	878682
P00491	PNP	407901	359671	470377	451145
P00492	HPRT1	313469	280570	364995	340325
P00505	GOT2	5.41988e+06	4818614	4.97415e+06	5.43695e+06
P00519	ABL1	16001.3	13547.3	19694.7	16866.5
P00533	EGFR	764898	783832	652354	746879
P00558	PGK1	4.70224e+06	4.09604e+06	5.48168e+06	5.05256e+06
P00568	AK1	308336	270541	338440	330822
P00734	F2	60553.3	62329.6	46193.6	59030.7
P00742	F10	33653.3	33751.4	34532.6	30872
P00746	CFD	69828.6	68336.9	74662.5	77124.9
P00813	ADA	198931	177971	209211	207151
P00846	MT-ATP6	1.2061e+06	1.35218e+06	3.48053e+06	2.09987e+06
P00966	ASS1	905399	811830	1.00443e+06	987655
P01008	SERPINC1	14861.7	21787.4	14587.4	20088.9
P01023	A2M	131326	132980	116272	129185
P01024	C3	11995.2	16098.6	15087.5	10558.9
P01033	TIMP1	256515	264372	267983	251513
P01034	CST3	88272.8	88357.9	87217.7	94530.2
P01111	NRAS	1.30502e+06	1.31295e+06	1.11479e+06	1.2531e+06
P01112	HRAS	111255	123170	95501.2	107603
P01116	KRAS	89411.1	97323.7	82808.8	83683.2
P01130	LDLR	317461	316549	267666	294743
P01135	TGFA	12266.6	14810.1	8089.92	10737.9
P01137	TGFB1	57786.8	67519.9	50560.9	52140.7
P01889	HLA-B	4.42502e+06	4.26558e+06	3.67342e+06	4.26818e+06
P01893	HLA-H	519194	563038	494392	528016
P02042	HBD	1.44187e+06	1392424	1.14667e+06	1.28414e+06
P02100	HBE1	662977	958135	670017	1.09376e+06
P02462	COL4A1	44000.3	42400.8	29755.3	42860.7
P02533	KRT14	22629.8	27424.6	79116	8038.97
P02545	LMNA	1.76117e+07	17669760	1.72738e+07	1.88633e+07
P02647	APOA1	97920.3	229227	123377	134252
P02649	APOE	20768.2	35012.9	28291	42012.7
P02686	MBP	49628.2	44501.2	51031.5	44119.1
P02749	APOH	61806.3	47582.2	36547.9	20714.7
P02753	RBP4	108286	96699.1	108034	115746
P02765	AHSG	213362	264826	126652	136652
P02768	ALB	6.77409e+06	7.49014e+06	4.28012e+06	4.74094e+06
P02774	GC	138570	170180	72164.5	68116.7
P02786	TFRC	6.33834e+06	6422613	5.80864e+06	5.92898e+06
P02787	TF	202159	193067	163420	169105
P02788	LTF	1.05293e+06	1.03901e+06	659549	674362
P02792	FTL	93658.2	97958.1	77622.2	102891
P02794	FTH1	311019	344734	303990	364414
P02795	MT2A	288723	180054	330106	333792
P03886	MT-ND1	191469	210633	194957	186313
P03891	MT-ND2	175025	248377	180784	152074
P03897	MT-ND3	274229	380328	460751	363149
P03905	MT-ND4	284966	350013	359048	279962
P03915	MT-ND5	252907	283285	268566	226378
P03923	MT-ND6	168833	206436	180500	172742
P03928	MT-ATP8	693864	722099	716031	752648
P03973	SLPI	47412.6	46796.6	42750.8	47384.1
P04003	C4BPA	16548.2	17320.8	13864.8	12340.5
P04004	VTN	876790	859910	746386	802048
P04040	CAT	1.33394e+06	1.38501e+06	1.22694e+06	1.31657e+06
P04049	RAF1	289227	268204	225964	231663
P04062	GBA	1.05292e+06	1.04775e+06	1.00144e+06	1.09147e+06
P04066	FUCA1	248640	233873	244009	198859
P04075	ALDOA	8.31179e+06	7.14259e+06	8.95291e+06	9.36828e+06
P04080	CSTB	1.06228e+06	975466	1.17423e+06	1.12866e+06
P04083	ANXA1	6.84392e+06	6.34968e+06	4.6689e+06	3.73369e+06
P04114	APOB	20034.6	30611.2	25844.8	27476.9
P04150	NR3C1	42913.9	38721.4	50060.2	43158.2
P04156	PRNP	263125	243242	232302	273335
P04179	SOD2	1.78258e+06	1.69579e+06	1.69236e+06	1.79629e+06
P04181	OAT	1.78372e+06	1.71554e+06	1.58503e+06	1.6752e+06
P04183	TK1	158535	136227	171726	154830
P04259	KRT6B	255456	435675	721360	441542
P04264	KRT1	278501	358949	523529	523752
P04350	TUBB4A	185435	170288	214543	173926
P04406	GAPDH	2.40977e+07	20469280	2.63647e+07	2.6223e+07
P04439	HLA-A	6.05799e+06	6383575	5.32334e+06	5.89194e+06
P04626	ERBB2	95610.8	99280.2	80748.6	85160.8
P04632	CAPNS1	855731	848274	756445	741482
P04792	HSPB1	4.40265e+06	4326839	4.96422e+06	4.85546e+06
P04818	TYMS	434047	391615	492942	479674
P04843	RPN1	5.07275e+06	5020477	4.98872e+06	4.27433e+06
P04844	RPN2	3.46749e+06	3.45423e+06	3.46512e+06	3.17353e+06
P04899	GNAI2	2.28697e+06	2.43884e+06	1.89517e+06	2.20201e+06
P04920	SLC4A2	1.8652e+06	1971036	1.6908e+06	1.90877e+06
P05023	ATP1A1	5.06398e+06	5159046	4.35979e+06	4.79948e+06
P05026	ATP1B1	2.81614e+06	2.57597e+06	2.30729e+06	2.62702e+06
P05067	APP	179031	186996	158787	199445
P05091	ALDH2	1.61284e+06	1.60445e+06	1.51295e+06	1.60011e+06
P05114	HMGN1	1.28901e+06	1081705	1.00199e+06	1.21215e+06
P05141	SLC25A5	2.46031e+07	26317402	2.41007e+07	2.61681e+07
P05161	ISG15	111376	109775	110796	117229
P05165	PCCA	72444.7	70364.6	66233.6	67431.7
P05166	PCCB	133775	135987	130296	132650
P05186	ALPL	189250	177947	150398	153761
P05187	ALPP	1.38447e+07	13250982	1.18459e+07	1.34117e+07
P05198	EIF2S1	3.02116e+06	3.09282e+06	2.93448e+06	3.21757e+06
P05204	HMGN2	53511.4	127577	180534	140681
P05362	ICAM1	101535	111909	99304.4	102934
P05386	RPLP1	6.18738e+06	6855369	6.56849e+06	7.89614e+06
P05387	RPLP2	8.41793e+06	8245211	8.20957e+06	9.50647e+06
P05388	RPLP0	6.25971e+06	6637222	7.13022e+06	7.23771e+06
P05412	JUN	14972	15639.8	17557.4	13191
P05413	FABP3	72526.5	62183.1	79299.1	81427.6
P05423	POLR3D	86050.8	90684.5	82982.6	79027.4
P05455	SSB	1.45491e+06	1.43372e+06	1.7816e+06	1.66259e+06
P05549	TFAP2A	311923	311384	283946	307954
P05556	ITGB1	2.68477e+06	2.71769e+06	2.48513e+06	2.60926e+06
P05783	KRT18	7.60763e+07	78886584	6.94814e+07	7.18776e+07
P05787	KRT8	6.76434e+07	72338872	6.77532e+07	6.26723e+07
P06132	UROD	188743	172426	215223	190266
P06213	INSR	177065	163704	130163	159532
P06241	FYN	21060.6	24643.4	20497.9	26854.5
P06280	GLA	217020	218386	204502	218901
P06396	GSN	687707	712801	609336	679006
P06400	RB1	12882.4	12674.7	16841.4	18187
P06454	PTMA	4.1325e+06	3.73637e+06	4.95626e+06	4.93311e+06
P06493	CDK1	891706	858242	946158	910465
P06576	ATP5F1B	1.79643e+07	17837064	1.74923e+07	1.83245e+07
P06703	S100A6	1.74413e+07	16328503	1.80741e+07	1.49064e+07
P06730	EIF4E	1.00412e+06	1.0523e+06	1.02739e+06	1.11166e+06
P06733	ENO1	1.18497e+07	9363364	1.44987e+07	1.41491e+07
P06737	PYGL	252179	247270	272934	259368
P06744	GPI	1.42343e+06	1.16857e+06	1.65934e+06	1.52863e+06
P06746	POLB	116445	124604	101979	111674
P06748	NPM1	2.17559e+07	22958480	1.94633e+07	2.21871e+07
P06753	TPM3	1.99824e+06	2056220	2.79317e+06	2.97704e+06
P06756	ITGAV	309083	316001	276082	308143
P06858	LPL	6428.36	6002.34	6957.21	7122.32
P06865	HEXA	432753	434473	398426	440532
P07093	SERPINE2	41292.8	37514.2	43693.1	44221.1
P07099	EPHX1	1.94e+06	1.95553e+06	1.80954e+06	1.72717e+06
P07108	DBI	655000	533906	687849	663671
P07195	LDHB	4.01522e+06	3.52684e+06	4.68836e+06	4.32646e+06
P07199	CENPB	173130	157324	141601	152140
P07203	GPX1	1.16158e+06	1.13239e+06	1.11732e+06	1.20076e+06
P07225	PROS1	36248.9	39948.9	39523.9	32569.7
P07237	P4HB	5.60926e+06	5.73837e+06	5.28201e+06	5.75333e+06
P07305	H1-0	2.98458e+06	2545295	2.86406e+06	2.45401e+06
P07311	ACYP1	81386.6	72048.2	97977.9	94070.7
P07339	CTSD	1.54465e+06	1.51587e+06	1.48649e+06	1.6031e+06
P07355	ANXA2	2.54531e+07	24841680	2.17934e+07	2.38648e+07
P07384	CAPN1	409116	418057	424036	424677
P07437	TUBB	1.00318e+07	9356067	1.1481e+07	1.09648e+07
P07602	PSAP	3.55144e+06	3.4487e+06	3.33291e+06	3.71209e+06
P07686	HEXB	584031	549810	548918	561904
P07711	CTSL	328001	341027	325950	353468
P07737	PFN1	8.6789e+06	7.80922e+06	9.40418e+06	8.90763e+06
P07738	BPGM	35341.2	28134.8	16969.9	25585.1
P07741	APRT	664780	603115	741592	699222
P07814	EPRS1	815799	832559	902878	957049
P07858	CTSB	1.36212e+06	1.36698e+06	1.36195e+06	1.48261e+06
P07900	HSP90AA1	4.57816e+06	4.18158e+06	5.20675e+06	5.19075e+06
P07902	GALT	18135.8	15554	17188.8	21195
P07910	HNRNPC	2.11348e+07	22041354	2.15489e+07	2.1666e+07
P07919	UQCRH	1.45109e+06	1.42951e+06	1.11812e+06	1.2852e+06
P07942	LAMB1	506477	509134	443383	501209
P07947	YES1	366795	378278	298388	356998
P07948	LYN	257037	277459	215912	256474
P07951	TPM2	187246	208287	222437	222379
P07954	FH	2.45112e+06	2.44722e+06	2.27219e+06	2.53711e+06
P07992	ERCC1	40766.4	39752.9	40773.1	32629.9
P07996	THBS1	16582.6	15751.7	16815.7	12988.2
P08047	SP1	139944	150097	109978	130591
P08069	IGF1R	473853	487938	400383	448094
P08133	ANXA6	2.82257e+06	2.78891e+06	2.23462e+06	2.49013e+06
P08134	RHOC	1.4174e+06	1.29802e+06	1.37757e+06	1.39212e+06
P08138	NGFR	25905.8	27219.7	14980.4	19244.6
P08174	CD55	2.76388e+06	2.68769e+06	2.25029e+06	2.55251e+06
P08195	SLC3A2	1.02392e+07	10301246	9.26865e+06	1.01573e+07
P08235	NR3C2	23218.7	17998.6	1243.69	8300.88
P08236	GUSB	183244	191712	200108	220195
P08237	PFKM	306643	274389	356527	312662
P08238	HSP90AB1	1.47564e+07	13473213	1.72491e+07	1.65946e+07
P08240	SRPRA	698020	675889	704499	609530
P08243	ASNS	248839	218948	274536	229161
P08397	HMBS	34925	33843.1	33832	35593.9
P08559	PDHA1	3.23279e+06	3.16457e+06	2.95165e+06	3.18641e+06
P08572	COL4A2	168412	174452	149227	173405
P08574	CYC1	1.87481e+06	1.92114e+06	1.71054e+06	1.791e+06
P08579	SNRPB2	514838	512076	543902	535800
P08581	MET	183699	192220	169592	185020
P08582	MELTF	33407.2	35686.9	30120.1	32170
P08621	SNRNP70	2.39055e+06	2.37372e+06	2.51431e+06	2.43872e+06
P08648	ITGA5	310529	324057	249964	281551
P08651	NFIC	127520	123537	103049	106138
P08670	VIM	3.26584e+07	32936228	3.4141e+07	3.63185e+07
P08708	RPS17	2.43527e+06	2.63432e+06	2.58469e+06	2.75518e+06
P08754	GNAI3	2.04517e+06	2142915	1.59024e+06	2.02541e+06
P08758	ANXA5	9.96364e+06	8659303	6.89889e+06	5.08684e+06
P08779	KRT16	6.68529e+06	7.15352e+06	2.04673e+07	6.12323e+06
P08865	RPSA	8.50675e+06	8870780	8.72436e+06	9.96102e+06
P08962	CD63	1.12873e+06	1085207	1.02947e+06	1.09689e+06
P09001	MRPL3	496234	508160	463596	477604
P09012	SNRPA	1.48818e+06	1.48021e+06	1.36752e+06	1.51421e+06
P09038	FGF2	122065	121520	104734	115907
P09104	ENO2	3.10098e+06	2.96802e+06	4.06491e+06	3.75571e+06
P09110	ACAA1	597743	636526	525907	624398
P09132	SRP19	246644	247325	255771	262570
P09234	SNRPC	1.7525e+06	1.77864e+06	1.54103e+06	1.73822e+06
P09382	LGALS1	1.23097e+07	11991162	1.06716e+07	1.19943e+07
P09417	QDPR	172977	169201	174575	184544
P09429	HMGB1	1.51982e+06	1.39518e+06	1.92867e+06	1.74662e+06
P09471	GNAO1	71805.7	69221.6	69699.7	66862.3
P09488	GSTM1	144196	125420	162496	151974
P09493	TPM1	442901	467575	513781	518634
P09496	CLTA	1.25543e+06	1.32552e+06	1.1838e+06	1.33278e+06
P09497	CLTB	907542	1.08982e+06	918843	965300
P09525	ANXA4	1.72065e+06	1.72836e+06	1.4014e+06	1.57878e+06
P09543	CNP	765847	782858	709450	759542
P09601	HMOX1	254375	261629	253105	271164
P09622	DLD	2.41967e+06	2.33509e+06	2.27642e+06	2.51702e+06
P09651	HNRNPA1	2.05553e+07	20202786	2.08302e+07	2.32329e+07
P09661	SNRPA1	1.95891e+06	1.91715e+06	1.99725e+06	1.94842e+06
P09668	CTSH	51842.6	49168.5	52821.2	55816
P09669	COX6C	1.5355e+06	1.42166e+06	1.49677e+06	1.52219e+06
P09874	PARP1	1.72155e+06	1610386	1.52744e+06	1.33026e+06
P09884	POLA1	1.04552e+06	988124	1.22386e+06	1.11843e+06
P09914	IFIT1	36585	32650.5	37173.4	34417.5
P09923	ALPI	5.3223e+06	4022476	4.29443e+06	4.81088e+06
P09958	FURIN	63393.3	62302.3	51815	51024.2
P09960	LTA4H	592557	518373	677055	623539
P09972	ALDOC	934035	814828	1.08268e+06	939951
P0C024	NUDT7	7420.65	11245.4	3935.32	10198.1
P0C0S5	H2AZ1	5.5581e+06	5.6872e+06	5.82841e+06	4.39669e+06
P0C0S8	H2AC11	2.9111e+07	23030530	2.79028e+07	1.94221e+07
P0C1Z6	TFPT	20957.3	20326.1	33127.3	31018.4
P0C221	CCDC175	486989	488370	293825	542223
P0C2W1	FBXO45	57944.1	65665.3	59517.1	58491.2
P0C7P0	CISD3	99383	84223.8	79901.9	78999
P0C7P4	UQCRFS1P1	2.1527e+06	2220990	2.12294e+06	2.21155e+06
P0CAP2	POLR2M	16098.2	21895.7	25322.9	26724.9
P0CG29	GSTT2	64506.9	49850.1	72912	77347.2
P0CG38	POTEI	952021	1.56325e+06	2.51907e+06	2.13021e+06
P0CG39	POTEJ	8.76091e+06	8262079	8.86551e+06	9.13413e+06
P0CG41	CTAGE8	20004.4	19896.5	14889.1	17250.7
P0CJ79	ZNF888	14502.5	15350.4	17472.5	13987.3
P0DI81	TRAPPC2	23108.7	24466.3	29357.2	35579.5
P0DI83	RAB34	48426.4	40787.4	60470.4	46523.4
P0DJ07	PET100	126413	119703	112965	103516
P0DJD0	RGPD1	71060	53166.5	69992.4	77088.6
P0DMM9	SULT1A3	85607.5	78760.2	91392.9	89340.7
P0DMU9	CT45A10	21252.8	29031.6	27171.2	18854.1
P0DMV8	HSPA1A	1.61977e+07	16564995	1.61038e+07	1.65911e+07
P0DN76	U2AF1L5	2.50528e+06	2.34705e+06	2.296e+06	2.49705e+06
P0DN79	CBSL	380571	342407	394441	393861
P0DP23	CALM1	7.47255e+06	7.46843e+06	7.55233e+06	8.15679e+06
P0DPB6	POLR1D	271988	284359	238469	239177
P0DPD7	EEF1AKMT4	48111.9	46617.1	53577.8	43621.7
P10109	FDX1	1.12157e+06	1.04959e+06	1.03396e+06	1.08855e+06
P10114	RAP2A	570289	563697	534925	566373
P10124	SRGN	103296	98915.6	102067	107529
P10155	RO60	144494	149251	171655	164213
P10176	COX8A	338558	273262	442399	362782
P10253	GAA	162016	164998	162907	174840
P10266	ERVK-10	65322.8	75953.3	15903.1	44709.1
P10301	RRAS	598747	632213	523944	585808
P10321	HLA-C	5.7492e+06	5.88025e+06	4.97223e+06	5.27281e+06
P10398	ARAF	120599	114115	85850.8	98022.6
P10412	H1-4	2.91588e+07	23930580	2.89637e+07	2.46051e+07
P10415	BCL2	10364.6	15211.6	10688	11813.1
P10515	DLAT	1.57149e+06	1.55041e+06	1.42692e+06	1.59465e+06
P10586	PTPRF	599253	634556	576992	706394
P10588	NR2F6	45555.2	45175.2	52555	45782.2
P10589	NR2F1	95843.8	98098.4	102868	95089.3
P10599	TXN	4.997e+06	4187582	6.06467e+06	5.93301e+06
P10606	COX5B	4.76401e+06	4895856	4.50693e+06	4.99666e+06
P10619	CTSA	559697	523300	511409	571609
P10620	MGST1	2.11956e+06	1.97606e+06	1.8233e+06	1.83603e+06
P10636	MAPT	40881.2	37200.2	49076.7	41515.7
P10644	PRKAR1A	504184	487494	565783	578729
P10646	TFPI	154517	157337	132282	148630
P10696	ALPG	375964	362004	352057	405889
P10768	ESD	233547	212201	258127	263570
P10809	HSPD1	2.60491e+07	26220934	2.46755e+07	2.64636e+07
P10909	CLU	217435	217851	196940	215217
P11021	HSPA5	1.25089e+07	12609712	1.18271e+07	1.25831e+07
P11047	LAMC1	308457	320596	268779	315856
P11117	ACP2	464839	504746	436554	471631
P11142	HSPA8	1.62047e+07	15832228	1.66981e+07	1.75143e+07
P11166	SLC2A1	1.39148e+06	1.49847e+06	1.18056e+06	1.19206e+06
P11169	SLC2A3	231361	243957	233470	218176
P11171	EPB41	183972	187807	172528	205833
P11172	UMPS	228618	203012	250424	223158
P11177	PDHB	1.66144e+06	1.67447e+06	1.56627e+06	1.67041e+06
P11182	DBT	513047	524091	481538	502465
P11216	PYGB	131857	139934	160822	143005
P11217	PYGM	459611	465005	515838	459736
P11233	RALA	575185	579941	590755	566626
P11234	RALB	839264	899545	817001	866008
P11274	BCR	29393.4	29788.5	31069.9	25389.5
P11277	SPTB	9676.9	10055.3	12299.3	10351.5
P11279	LAMP1	2.45612e+06	2.45064e+06	1.87567e+06	2.32728e+06
P11310	ACADM	4.33222e+06	4288513	4.00908e+06	4.57889e+06
P11362	FGFR1	35918.4	39300.7	37571.3	39865
P11387	TOP1	1.53753e+06	1.38694e+06	1.53581e+06	1.08887e+06
P11388	TOP2A	2.09316e+06	1798568	2.00842e+06	1.45632e+06
P11413	G6PD	1.55845e+06	1356567	1.58841e+06	1.62606e+06
P11441	UBL4A	183365	188202	217669	212762
P11474	ESRRA	43010.6	43064.2	33774.1	25725.4
P11498	PC	1.07744e+06	1.04757e+06	1.00157e+06	1.06299e+06
P11532	DMD	141921	146456	136342	145470
P11586	MTHFD1	1.37305e+06	1246526	1.48692e+06	1.48207e+06
P11717	IGF2R	711118	738703	638230	697455
P11766	ADH5	375479	321093	428592	376858
P11802	CDK4	100732	91995.9	121959	114529
P11908	PRPS2	1.0859e+06	988785	1.26786e+06	1.25864e+06
P11940	PABPC1	5.51822e+06	5983045	5.67181e+06	6.36232e+06
P12004	PCNA	2.24271e+06	1.99571e+06	2.55625e+06	2.41558e+06
P12036	NEFH	295215	346271	296266	352818
P12074	COX6A1	265841	203918	209969	246560
P12081	HARS1	1.11201e+06	987906	1.23121e+06	1.2028e+06
P12109	COL6A1	183226	183728	166915	178482
P12110	COL6A2	66235.9	62807.3	60183	57033.5
P12235	SLC25A4	4.3284e+06	4647037	4.20201e+06	4.57653e+06
P12236	SLC25A6	4.01126e+06	4248434	4.20267e+06	4.0558e+06
P12259	F5	103813	114428	64388.6	83790.8
P12268	IMPDH2	1.78844e+06	1.84921e+06	2.00344e+06	2.0703e+06
P12270	TPR	1.6627e+06	1.75801e+06	1.56335e+06	1.70123e+06
P12277	CKB	1.93236e+06	1779351	2.11348e+06	2.11327e+06
P12429	ANXA3	2.85256e+06	2.50313e+06	2.00967e+06	1.73292e+06
P12532	CKMT1A	3.18227e+06	3.07947e+06	2.59901e+06	2.85069e+06
P12694	BCKDHA	441475	436482	393158	441690
P12814	ACTN1	1.18552e+07	12250900	1.33514e+07	1.50881e+07
P12931	SRC	208640	205715	200989	232138
P12955	PEPD	243620	215452	256221	270045
P12956	XRCC6	2.63815e+06	2.68287e+06	2.88961e+06	2.80339e+06
P13010	XRCC5	2.97597e+06	3076174	3.2462e+06	3.22088e+06
P13051	UNG	156124	151222	185005	168234
P13073	COX4I1	3.97021e+06	4180821	3.94076e+06	4.09875e+06
P13196	ALAS1	49857	51374.9	44566.8	50441.1
P13224	GP1BB	65806.5	48966.7	60424	58076.9
P13284	IFI30	437607	409702	432768	471961
P13473	LAMP2	2.83112e+06	2897082	2.80902e+06	3.12317e+06
P13489	RNH1	477172	412427	462796	483956
P13497	BMP1	28355.7	29059.5	32475.5	29015.5
P13498	CYBA	421983	458135	433505	335913
P13637	ATP1A3	31009.4	34662.2	34287.9	37045
P13639	EEF2	4.91753e+06	4.35997e+06	5.46708e+06	5.25452e+06
P13645	KRT10	150044	195222	244639	283031
P13646	KRT13	215721	210501	206147	180034
P13647	KRT5	22848.9	23346.3	180708	37220.6
P13667	PDIA4	3.20958e+06	3.25691e+06	3.111e+06	3.39588e+06
P13674	P4HA1	564945	600274	548897	575942
P13693	TPT1	718323	667108	808252	765785
P13716	ALAD	33986.2	31731.5	41335.3	38860.6
P13726	F3	21971.6	19504.8	21219.5	26899.7
P13747	HLA-E	21715	20482.4	19865.7	19975.2
P13797	PLS3	1.19606e+06	1.08796e+06	1.36188e+06	1.29738e+06
P13798	APEH	399020	365360	419031	411701
P13804	ETFA	2.63734e+06	2.73832e+06	2.52884e+06	2.60706e+06
P13807	GYS1	267071	275887	292153	312611
P13861	PRKAR2A	406998	438680	423225	460455
P13928	ANXA8	117101	85835.8	83546.7	49356.5
P13984	GTF2F2	157176	140999	175044	154593
P13987	CD59	1.81373e+06	1.82505e+06	1.45641e+06	1.71644e+06
P13994	CCDC130	19765.7	16007	17652.7	12957.1
P13995	MTHFD2	1.71288e+06	1.64867e+06	1.54269e+06	1.74422e+06
P14174	MIF	4.18017e+06	3.22051e+06	5.37819e+06	5.19935e+06
P14209	CD99	528659	562572	503845	508483
P14314	PRKCSH	3.56027e+06	3.78811e+06	3.31504e+06	3.64389e+06
P14316	IRF2	36717.2	35761.7	31249.7	29042.1
P14324	FDPS	415809	354219	484302	424613
P14373	TRIM27	108833	115941	96865.8	111528
P14384	CPM	611267	602253	518522	568828
P14406	COX7A2	4.02996e+06	3.88164e+06	3.48513e+06	3.53312e+06
P14550	AKR1A1	138524	121113	148309	142018
P14618	PKM	1.09694e+07	9751797	1.22355e+07	1.14875e+07
P14621	ACYP2	48040	42611.4	45617.8	45889
P14625	HSP90B1	1.12958e+07	11157240	1.03999e+07	1.17363e+07
P14635	CCNB1	63386.3	68581	80738.3	73802.8
P14649	MYL6B	3.08434e+06	3279717	3.10376e+06	3.25153e+06
P14672	SLC2A4	18365.9	21679.1	18352.3	16558.3
P14678	SNRPB	3.71624e+06	3.87015e+06	3.56813e+06	3.76614e+06
P14735	IDE	353446	345799	350436	347922
P14854	COX6B1	3.72659e+06	3861183	3.12671e+06	3.45075e+06
P14859	POU2F1	195189	209703	197467	198892
P14866	HNRNPL	3.3754e+06	3.28286e+06	3.12444e+06	3.53644e+06
P14868	DARS1	1.33602e+06	1.27062e+06	1.52627e+06	1.49381e+06
P14923	JUP	630363	640308	608673	648909
P14927	UQCRB	2.04063e+06	2.01677e+06	1.90427e+06	2.10899e+06
P15104	GLUL	73191.6	67567.3	82647.2	79507.1
P15121	AKR1B1	1.04962e+06	921011	1.14821e+06	1.11738e+06
P15151	PVR	355140	367107	312331	350130
P15170	GSPT1	369438	353233	423793	426209
P15260	IFNGR1	29101	34103.1	21454.6	27988
P15289	ARSA	101283	87148.2	99800.5	82237.5
P15291	B4GALT1	410148	420949	357042	413294
P15311	EZR	2.12598e+06	1.98556e+06	2.31227e+06	2.34663e+06
P15336	ATF2	45820.9	45885.8	43982.7	46042.3
P15374	UCHL3	113458	105030	135163	127616
P15408	FOSL2	135955	143953	135162	157195
P15509	CSF2RA	74335.8	80776.4	66866.7	80759.6
P15529	CD46	1.23575e+06	1.36232e+06	1.13607e+06	1.16024e+06
P15531	NME1	1.84127e+06	1.64206e+06	2.18134e+06	2.02126e+06
P15559	NQO1	900483	805008	986351	930498
P15586	GNS	700777	664857	646252	687627
P15735	PHKG2	77550.6	69195.1	85016	98357.9
P15822	HIVEP1	7199.24	6550.5	6732.83	7821.21
P15848	ARSB	12450.2	12035.4	10847.1	12888
P15880	RPS2	5.44824e+06	5.3193e+06	6.21571e+06	5.78977e+06
P15882	CHN1	151212	141686	175583	140773
P15924	DSP	1.48801e+06	1.58004e+06	1.39677e+06	1.52506e+06
P15927	RPA2	636828	602992	776101	770003
P15941	MUC1	22415.4	25662.2	24206.9	26957.6
P15954	COX7C	493128	485170	565002	582050
P16035	TIMP2	65809.4	63580.5	56220.7	70911.3
P16066	NPR1	2.02407e+06	2038889	1.77991e+06	1.82573e+06
P16070	CD44	1.59565e+06	1.61393e+06	1.30186e+06	1.59371e+06
P16083	NQO2	175853	157801	196829	199998
P16104	H2AX	9.39963e+07	103057376	1.14518e+08	7.47493e+07
P16144	ITGB4	525079	529935	466254	483064
P16152	CBR1	1.11056e+06	937868	1.23721e+06	1.17593e+06
P16157	ANK1	7421.04	8669.48	11030.3	12269.5
P16219	ACADS	346326	339931	315269	379046
P16220	CREB1	479421	498893	431979	457722
P16260	SLC25A16	59532	64845.8	56798.1	53210.2
P16278	GLB1	396013	400890	386396	382919
P16298	PPP3CB	28549.6	26248.2	28422.2	29911.9
P16333	NCK1	837168	771293	916088	902993
P16383	GCFC2	52720.7	48451.7	53933.4	49484.1
P16401	H1-5	1.45085e+07	11675830	1.52066e+07	1.2573e+07
P16403	H1-2	1.11572e+07	9151873	1.00121e+07	8.61896e+06
P16422	EPCAM	900620	902744	701817	822178
P16435	POR	2.16343e+06	2.13412e+06	2.0817e+06	2.02616e+06
P16455	MGMT	18899.4	15246.7	21186.3	21955.3
P16591	FER	13484.7	13450.6	21132.7	12799.1
P16615	ATP2A2	3.78717e+06	3.71015e+06	3.6383e+06	3.20354e+06
P16930	FAH	102268	87889.2	99309.9	106152
P16949	STMN1	920519	818246	979029	993384
P16989	YBX3	855532	986794	903782	990354
P17010	ZFX	33289.9	27196.8	29646.2	27822
P17028	ZNF24	78529.8	80250.6	74607.2	79385.9
P17029	ZKSCAN1	28740.3	28952.4	28503.6	23198.3
P17050	NAGA	201160	188694	183412	194009
P17096	HMGA1	4.42859e+06	3667731	4.14557e+06	3.8164e+06
P17152	TMEM11	414934	388667	344486	348351
P17174	GOT1	541009	486246	551989	533964
P17252	PRKCA	159101	168337	133397	155652
P17275	JUNB	127904	120931	128276	114239
P17301	ITGA2	288010	285608	230200	268486
P17342	NPR3	26299.4	28013.7	24477.1	30156.4
P17405	SMPD1	110531	113004	111494	115103
P17480	UBTF	751943	714048	693174	727817
P17516	AKR1C4	14155.3	14710	34420	20797.4
P17535	JUND	178716	181878	170841	173830
P17544	ATF7	89050.4	91075.2	94932.1	99062.7
P17568	NDUFB7	492465	465413	406819	425680
P17600	SYN1	1.33635e+06	1.24136e+06	1.28598e+06	1.43624e+06
P17612	PRKACA	238992	252916	278023	251367
P17655	CAPN2	543208	521670	529421	494966
P17661	DES	7214.32	8526.42	14815.3	4127.24
P17676	CEBPB	405408	406944	361579	396815
P17706	PTPN2	164295	164264	177655	171177
P17812	CTPS1	707756	653248	781981	749528
P17844	DDX5	5.18628e+06	5.3372e+06	4.87649e+06	5.20409e+06
P17858	PFKL	599613	591425	672071	597122
P17900	GM2A	221360	194593	203419	216119
P17931	LGALS3	4.04512e+06	3.60328e+06	4.02528e+06	4.42225e+06
P17936	IGFBP3	18612.7	20046.3	24920.3	17198.6
P17980	PSMC3	1.26608e+06	1.2523e+06	1.41669e+06	1.43949e+06
P17987	TCP1	2.63363e+06	2.32039e+06	3.04557e+06	3.02457e+06
P18031	PTPN1	927209	935709	845397	853346
P18074	ERCC2	215894	219008	186848	168107
P18077	RPL35A	4.03267e+06	3.87567e+06	4.33368e+06	4.37714e+06
P18084	ITGB5	203599	196170	200953	209745
P18085	ARF4	1.27236e+06	1207994	1.37937e+06	1.40536e+06
P18124	RPL7	5.49558e+06	5075092	5.02096e+06	5.98933e+06
P18206	VCL	766529	727867	845774	849835
P18405	SRD5A1	3930.73	3785.95	1691.8	3033.79
P18433	PTPRA	60317.7	70203.7	50161.4	62094.8
P18440	NAT1	29485.8	22361.1	22567.9	16033.4
P18583	SON	974165	1.00671e+06	878570	971364
P18615	NELFE	175781	179825	199819	203730
P18621	RPL17	4.75621e+06	4708315	5.15339e+06	5.26012e+06
P18669	PGAM1	2.17695e+06	1.88012e+06	2.50184e+06	2.50273e+06
P18754	RCC1	2.15789e+06	2.18821e+06	2.03897e+06	2.0764e+06
P18827	SDC1	370656	343424	495330	544012
P18846	ATF1	344990	324293	308094	350558
P18850	ATF6	270734	284278	277378	245281
P18858	LIG1	125029	109144	142682	133825
P18859	ATP5PF	1.36438e+06	1.35365e+06	1.34386e+06	1.41547e+06
P18887	XRCC1	729392	710292	624468	666812
P19012	KRT15	85267.7	96730.2	70784.6	74128.3
P19021	PAM	42753.2	49478.6	44943.8	40603.8
P19022	CDH2	11799.2	3463.79	11314.8	13507
P19075	TSPAN8	409091	441047	461635	513082
P19174	PLCG1	65020.8	52332.9	66498.9	68106.8
P19256	CD58	382064	395854	352061	427636
P19338	NCL	1.27745e+07	13190958	1.36026e+07	1.39204e+07
P19367	HK1	1.10031e+06	1.08038e+06	933011	946210
P19387	POLR2C	638088	677938	650813	748919
P19388	POLR2E	637166	648708	636343	648741
P19404	NDUFV2	998286	1.05199e+06	892104	1.00752e+06
P19438	TNFRSF1A	50901.3	49527.3	47741.9	57468.5
P19447	ERCC3	155084	151639	145301	139357
P19525	EIF2AK2	547198	571081	551523	623655
P19623	SRM	988303	931073	1.06224e+06	1.00613e+06
P19634	SLC9A1	34706.3	39347.8	42309.6	41988.7
P19784	CSNK2A2	417388	447585	425758	401823
P19793	RXRA	68252.1	68703.3	68372.8	64584.2
P19838	NFKB1	117963	112971	125774	132143
P19971	TYMP	93639.3	81265.2	101026	93817
P20020	ATP2B1	1.01718e+06	1063885	842842	962545
P20023	CR2	70666.8	75739.9	59925.9	74082.9
P20042	EIF2S2	2.0286e+06	2.10719e+06	1.94118e+06	2.0653e+06
P20073	ANXA7	1.26598e+06	1.13572e+06	825180	749738
P20226	TBP	92525.1	92887.1	84029.4	84855.1
P20248	CCNA2	82176.7	63965.7	84957.4	80676.6
P20290	BTF3	1.01613e+06	1.07226e+06	977792	1.15728e+06
P20336	RAB3A	47376.7	51426.4	45607.9	45700.8
P20337	RAB3B	21461.9	16719.2	44580.1	60230.7
P20338	RAB4A	122770	127005	130037	124538
P20339	RAB5A	2.50804e+06	2.52536e+06	2.36104e+06	2.34244e+06
P20340	RAB6A	863828	846411	855191	818555
P20585	MSH3	16516.8	15758.7	21490.9	12802.4
P20618	PSMB1	1.43525e+06	1.35187e+06	1.65401e+06	1.60868e+06
P20645	M6PR	1.06088e+06	1.1373e+06	914166	1.04802e+06
P20674	COX5A	4.33462e+06	4.27139e+06	4.20954e+06	4.67429e+06
P20700	LMNB1	4.05822e+06	3.9923e+06	3.74321e+06	4.00365e+06
P20719	HOXA5	39132.7	27399.3	39656.2	31290.1
P20742	PZP	93081.8	90038.1	93079.3	103024
P20807	CAPN3	119108	121474	131355	87683.7
P20810	CAST	321274	305265	342596	333681
P20839	IMPDH1	652442	657784	701580	775083
P20851	C4BPB	129245	136748	113123	138176
P20908	COL5A1	11958.8	10107.5	12511.2	21249.9
P20933	AGA	136835	125402	118461	141858
P20936	RASA1	13702.4	10411.4	13161	11465.6
P20962	PTMS	427099	404514	511737	535654
P21127	CDK11B	223590	247113	249220	245873
P21266	GSTM3	854103	744590	904095	915588
P21281	ATP6V1B2	762193	759500	586184	629178
P21283	ATP6V1C1	309837	305883	263323	261504
P21291	CSRP1	644863	609212	716459	748530
P21333	FLNA	3.77114e+06	3.91312e+06	4.51378e+06	4.55018e+06
P21359	NF1	72669.4	81897.6	78592.8	78637.3
P21399	ACO1	193451	170545	213278	194798
P21583	KITLG	43957.2	39959.4	26945.4	41283.6
P21589	NT5E	69096.1	70265.1	57674.1	66713.3
P21675	TAF1	69776.2	62413.7	61845.5	55309
P21796	VDAC1	1.75397e+07	17732264	1.61715e+07	1.82352e+07
P21912	SDHB	1.53123e+06	1.54279e+06	1.4127e+06	1.54574e+06
P21926	CD9	638374	639373	502746	588055
P21953	BCKDHB	503062	471579	441705	489054
P21964	COMT	992258	928650	903089	823820
P21980	TGM2	14101.9	14969.2	16433.1	14872.8
P22004	BMP6	11487.7	11440.1	17703.7	11170.5
P22033	MMUT	384921	378393	357991	373093
P22059	OSBP	302021	281843	353071	367102
P22061	PCMT1	670163	624682	654572	647065
P22087	FBL	4.63347e+06	4.20796e+06	4.3108e+06	4.23457e+06
P22102	GART	856047	756382	913951	901508
P22234	PAICS	5.45237e+06	4882777	6.226e+06	5.61489e+06
P22307	SCP2	2.70587e+06	2.79572e+06	2.51784e+06	2.79108e+06
P22314	UBA1	2.70296e+06	2.37543e+06	3.209e+06	3.00896e+06
P22392	NME2	4.91272e+06	4400601	5.30056e+06	5.30001e+06
P22413	ENPP1	74588	73096.5	58482	62797.9
P22415	USF1	100371	102754	81902.3	99547.3
P22466	GAL	122743	133368	118703	129550
P22570	FDXR	507809	523941	459138	506672
P22626	HNRNPA2B1	3.23487e+07	30982316	3.22385e+07	3.81576e+07
P22670	RFX1	86129.3	93276.8	86182.8	79751.7
P22681	CBL	38116.1	39019.4	47893.2	45557.1
P22694	PRKACB	377186	401974	429908	452575
P22695	UQCRC2	3.02913e+06	3.01558e+06	2.76633e+06	2.9648e+06
P22830	FECH	146249	150912	131642	138914
P23025	XPA	17953.4	20370.6	28566.9	28933.2
P23142	FBLN1	211217	209681	171713	179916
P23193	TCEA1	395855	400279	513054	463784
P23229	ITGA6	393194	403210	329268	378417
P23246	SFPQ	7.38199e+06	7.91445e+06	7.3523e+06	7.59655e+06
P23258	TUBG1	265668	283719	311544	300523
P23284	PPIB	1.05442e+07	9919448	9.70681e+06	1.06838e+07
P23368	ME2	657901	651997	552607	626929
P23378	GLDC	522829	514419	468878	521775
P23381	WARS1	332994	297233	337467	337751
P23396	RPS3	1.05873e+07	10979407	1.08866e+07	1.13663e+07
P23434	GCSH	675779	750396	570847	731837
P23443	RPS6KB1	69328.1	52700.1	67140.6	68437.6
P23458	JAK1	176497	182425	159172	170239
P23469	PTPRE	11957.3	9374.05	12605.1	3732
P23497	SP100	122728	136583	86682.2	111465
P23511	NFYA	31178.6	31864.8	29393	25639
P23526	AHCY	1.77344e+06	1.59158e+06	2.04925e+06	1.8968e+06
P23528	CFL1	9.14252e+06	8472692	9.25517e+06	9.4511e+06
P23588	EIF4B	1.32384e+06	1.39259e+06	1.51057e+06	1.65613e+06
P23610	F8A1	31323.1	28705.9	34102	27155
P23634	ATP2B4	703831	714679	594592	664529
P23677	ITPKA	45095.9	45505.7	38412.9	48713.2
P23743	DGKA	77528.1	72392.1	83506.9	79928.5
P23786	CPT2	817178	808184	710759	753273
P23919	DTYMK	476798	448502	503618	511221
P23921	RRM1	393420	343267	429664	428743
P24311	COX7B	522233	542764	491461	486678
P24385	CCND1	28150.5	32164.6	26124	30805.3
P24386	CHM	42433.8	49200.1	45657.4	47754.7
P24390	KDELR1	195090	210110	232254	184581
P24468	NR2F2	128033	123127	110114	115389
P24534	EEF1B2	4.30862e+06	4404736	5.07257e+06	5.58984e+06
P24539	ATP5PB	2.76029e+06	2.99593e+06	3.0657e+06	3.10211e+06
P24666	ACP1	900511	798026	964353	944719
P24752	ACAT1	3.35581e+06	3.29922e+06	3.03498e+06	3.31227e+06
P24844	MYL9	26387.1	30054.7	30733.4	29020
P24863	CCNC	41286.8	37580.6	38545	37682
P24928	POLR2A	510813	518437	478488	513358
P24941	CDK2	400968	379123	393196	380623
P25054	APC	76236.4	80832.5	74715.5	75411.4
P25098	GRK2	18304.9	19517.9	30072.7	24203.1
P25205	MCM3	2.76268e+06	2.58762e+06	2.66304e+06	2.57346e+06
P25208	NFYB	127851	140816	170401	230924
P25325	MPST	401938	408063	376795	430597
P25398	RPS12	4.17064e+06	4606938	4.35066e+06	4.70779e+06
P25440	BRD2	227502	230585	203953	199839
P25445	FAS	69056.1	73379.7	62775.5	73774.4
P25490	YY1	157023	161192	146613	149303
P25685	DNAJB1	620883	612872	710082	665450
P25686	DNAJB2	45439.7	42349.8	56080.3	42192.7
P25705	ATP5F1A	2.01673e+07	19406664	1.87446e+07	1.98985e+07
P25786	PSMA1	1.99814e+06	1.97384e+06	2.28142e+06	2.34567e+06
P25787	PSMA2	1.12316e+06	1.117e+06	1.26949e+06	1.29815e+06
P25788	PSMA3	1.53023e+06	1.53716e+06	1.81232e+06	1.84008e+06
P25789	PSMA4	1.06225e+06	1.0385e+06	1.24592e+06	1.27307e+06
P25815	S100P	1.52786e+06	1626201	1.52581e+06	1.24149e+06
P25942	CD40	95458.9	84361.7	72890.4	90135
P25963	NFKBIA	37144.7	39924.2	32471.9	47904.7
P26006	ITGA3	1.14611e+06	1.22905e+06	992983	1.11913e+06
P26038	MSN	1.06875e+06	981179	1.1682e+06	1.14174e+06
P26196	DDX6	835375	869398	849474	945256
P26358	DNMT1	271455	245520	291457	172988
P26368	U2AF2	2.3279e+06	2.39991e+06	2.21399e+06	2.17524e+06
P26373	RPL13	8.61696e+06	8120576	8.96079e+06	9.36066e+06
P26374	CHML	80570.2	91445.1	95974.9	101823
P26440	IVD	125305	135962	108576	132724
P26447	S100A4	7.99861e+06	7864977	7.03675e+06	6.01753e+06
P26572	MGAT1	174584	190757	174017	176662
P26583	HMGB2	529145	529091	625909	603313
P26599	PTBP1	3.32275e+06	3.25537e+06	3.33782e+06	3.44656e+06
P26639	TARS1	1.12798e+06	1.06648e+06	1.24567e+06	1.25923e+06
P26640	VARS1	730765	735986	887554	863671
P26641	EEF1G	3.77852e+06	3.84588e+06	4.62875e+06	4.72386e+06
P26885	FKBP2	1.58734e+06	1.55012e+06	1.60939e+06	1.74704e+06
P27037	ACVR2A	10941	9126.93	11411.7	12673.6
P27105	STOM	1.361e+06	1.48084e+06	1.13161e+06	1.3967e+06
P27144	AK4	1.36898e+06	1.38068e+06	1.267e+06	1.34596e+06
P27338	MAOB	364269	396272	381016	375433
P27348	YWHAQ	3.46773e+06	3.16592e+06	3.78664e+06	3.67458e+06
P27361	MAPK3	114426	108661	122092	127268
P27448	MARK3	1.00506e+06	934183	965007	855271
P27449	ATP6V0C	201637	301778	313358	274563
P27540	ARNT	60856.3	59817.5	70020.6	71409.7
P27544	CERS1	68309.8	63813	64895.8	54434
P27635	RPL10	4.38317e+06	4.22037e+06	4.70638e+06	5.33265e+06
P27694	RPA1	444108	425875	508664	496561
P27695	APEX1	1.76559e+06	1.68986e+06	2.06389e+06	2.04944e+06
P27701	CD82	53867	65708.8	62727.8	55715.5
P27707	DCK	50661.6	43809.2	62147.8	64013.4
P27708	CAD	880370	862403	978406	933842
P27797	CALR	2.39031e+07	23984092	2.10487e+07	2.48667e+07
P27816	MAP4	752861	768273	855667	752509
P27824	CANX	6.2588e+06	6.5681e+06	6.46997e+06	5.48678e+06
P28062	PSMB8	209334	208207	262339	260116
P28065	PSMB9	106052	92874.2	139297	135923
P28066	PSMA5	1.28567e+06	1.23656e+06	1.42614e+06	1.49263e+06
P28070	PSMB4	741926	776155	869438	905626
P28072	PSMB6	1.79268e+06	1.72505e+06	2.02209e+06	2.07702e+06
P28074	PSMB5	779701	763296	883612	926897
P28288	ABCD3	1.4461e+06	1.46961e+06	1.41119e+06	1.3732e+06
P28289	TMOD1	30188.4	27078.5	32655.8	31360.9
P28290	ITPRID2	199870	199715	180538	197130
P28300	LOX	160815	155341	176575	182649
P28328	PEX2	39115.7	38727	33800.2	37562.2
P28331	NDUFS1	2.02073e+06	2.10295e+06	1.82121e+06	1.98779e+06
P28340	POLD1	366127	353000	426599	398163
P28347	TEAD1	75402.2	66770.5	67650.1	66174
P28370	SMARCA1	191517	181372	179647	159191
P28482	MAPK1	715066	746449	752729	718845
P28676	GCA	124025	113407	124647	101722
P28702	RXRB	53852.9	51599.1	47130.9	46884.3
P28715	ERCC5	45753.3	42490.1	42158.5	40997.5
P28799	GRN	820068	821983	725398	824918
P28827	PTPRM	36467.6	36442.4	41940.2	48542.6
P28838	LAP3	887868	850508	814908	853912
P29083	GTF2E1	54526.8	57167.6	64462.3	61221.2
P29084	GTF2E2	41432.2	43854.4	41518.5	39474.1
P29144	TPP2	249179	241809	230668	248640
P29218	IMPA1	129285	103784	138135	141666
P29317	EPHA2	177822	184192	153211	179904
P29323	EPHB2	36280.1	34166.5	34250.6	30945.6
P29353	SHC1	157467	165208	160735	163264
P29372	MPG	246651	236929	242361	239624
P29373	CRABP2	98744.1	80048.9	101681	103246
P29374	ARID4A	54943.4	56791.3	53914.8	54780.9
P29375	KDM5A	23110.2	21637.9	24646.1	17689.8
P29401	TKT	5.09112e+06	4308942	6.31146e+06	5.66951e+06
P29466	CASP1	13110.1	15584.5	20915.1	20514.2
P29558	RBMS1	240562	260028	207105	242934
P29590	PML	194261	200299	172024	175079
P29597	TYK2	28739.9	26534.7	25019.5	24953
P29692	EEF1D	3.28569e+06	3324696	3.89357e+06	4.05943e+06
P29762	CRABP1	32594.2	34845.8	43563.7	32907
P29966	MARCKS	1.7608e+06	1.8651e+06	1.60574e+06	1.78473e+06
P29992	GNA11	643778	658091	568270	618390
P30038	ALDH4A1	359218	371399	328429	376460
P30040	ERP29	8.7414e+06	9189762	8.61972e+06	9.3035e+06
P30041	PRDX6	4.15136e+06	3681969	4.67956e+06	4.28933e+06
P30043	BLVRB	1.04554e+06	908559	1.14435e+06	1.02757e+06
P30044	PRDX5	3.04545e+06	2802311	3.16636e+06	3.16192e+06
P30046	DDT	1.15492e+06	1.00575e+06	1.33369e+06	1.27853e+06
P30047	GCHFR	100781	86559.7	109146	107057
P30048	PRDX3	6.63525e+06	6527681	6.43063e+06	7.06009e+06
P30049	ATP5F1D	3.81852e+06	4296181	3.12637e+06	3.69825e+06
P30050	RPL12	6.65804e+06	7.07032e+06	6.83701e+06	7.06115e+06
P30084	ECHS1	3.60358e+06	3.43168e+06	3.26541e+06	3.56967e+06
P30085	CMPK1	378794	350338	416769	413660
P30086	PEBP1	1.37559e+06	1.16428e+06	1.44356e+06	1.55295e+06
P30101	PDIA3	1.25622e+07	12343577	1.18232e+07	1.30633e+07
P30153	PPP2R1A	1.27106e+06	1.24432e+06	1.33962e+06	1.35799e+06
P30154	PPP2R1B	221361	225166	234056	227238
P30260	CDC27	257031	254245	234870	231918
P30281	CCND3	14890.5	15841.5	16745.6	14815.5
P30291	WEE1	8683.65	11107.6	17219.9	8332.56
P30307	CDC25C	37136.2	33780.3	40695.3	35271.3
P30405	PPIF	868533	874099	882702	957501
P30408	TM4SF1	331944	484369	241866	332145
P30414	NKTR	73343.7	80509.2	64814.3	72912.7
P30419	NMT1	772899	821842	786923	849362
P30511	HLA-F	29115.4	30460.7	27846.3	29412.6
P30519	HMOX2	784292	815041	751152	720482
P30520	ADSS2	210375	203695	232317	210928
P30530	AXL	35918	38317.4	41228.2	38938.5
P30533	LRPAP1	1.3593e+06	1.37481e+06	1.34082e+06	1.42598e+06
P30536	TSPO	1.27526e+06	1.14724e+06	1.37697e+06	1.31334e+06
P30566	ADSL	219592	207171	245033	230735
P30622	CLIP1	83424.8	86339.4	92823.1	96879.9
P30626	SRI	2.21838e+06	2102258	1.95278e+06	1.81078e+06
P30711	GSTT1	49109.4	59441	54576.7	66791.2
P30740	SERPINB1	148463	128660	162242	148527
P30825	SLC7A1	405084	479623	438719	446927
P30837	ALDH1B1	378418	377665	351664	385938
P30838	ALDH3A1	48015.5	40934.6	74484.4	47143.8
P30876	POLR2B	467338	482791	466424	459878
P31040	SDHA	3.60428e+06	3.68831e+06	3.14495e+06	3.56336e+06
P31146	CORO1A	18360.5	15815.1	17082.1	13939.9
P31150	GDI1	284473	244382	286978	277607
P31153	MAT2A	926427	846296	1.06413e+06	1.00679e+06
P31260	HOXA10	7933.85	10148.2	12111.9	9987.46
P31271	HOXA13	76907.2	78192.1	61948.4	65644.3
P31276	HOXC13	55301.6	48877.1	35401.5	35576.5
P31321	PRKAR1B	251414	268686	274473	306275
P31323	PRKAR2B	41332.3	42310.9	43558.9	47487
P31327	CPS1	1.2773e+07	12481338	1.19779e+07	1.28327e+07
P31350	RRM2	417120	363748	479184	435366
P31431	SDC4	66503.3	67446	69917.2	72823.3
P31483	TIA1	1.06436e+06	1.07216e+06	948012	1.10537e+06
P31641	SLC6A6	118330	123990	81116.8	99625.2
P31689	DNAJA1	815771	839359	860275	941598
P31749	AKT1	24397.5	24768.2	27201.5	26586.9
P31751	AKT2	16425.7	11205.2	23043.8	18897.9
P31930	UQCRC1	3.5453e+06	3371812	3.21958e+06	3.63703e+06
P31937	HIBADH	959019	991182	898382	931872
P31939	ATIC	445318	394404	475392	454978
P31942	HNRNPH3	2.77046e+06	2.87289e+06	2.6217e+06	3.05286e+06
P31943	HNRNPH1	1.02336e+07	10101930	9.68486e+06	1.08492e+07
P31946	YWHAB	8.38735e+06	7.80407e+06	9.71361e+06	9.61472e+06
P31947	SFN	761287	690425	782760	808026
P31948	STIP1	2.2407e+06	2.16538e+06	2.6769e+06	2.56672e+06
P31949	S100A11	1.22448e+07	11860555	1.0802e+07	1.05032e+07
P32004	L1CAM	762367	785793	698608	736678
P32119	PRDX2	3.98505e+06	3769414	4.15833e+06	4.1478e+06
P32121	ARRB2	64547.7	61610.9	62888.1	66168.3
P32189	GK	209879	211498	205030	206194
P32242	OTX1	16538	16675.6	17135.2	13990.7
P32320	CDA	191389	173528	191129	191219
P32321	DCTD	81600.5	69251.4	77722.1	75438.9
P32322	PYCR1	1.3763e+06	1.3395e+06	1.25439e+06	1.3278e+06
P32456	GBP2	26008.4	19671.3	22817.6	21281.8
P32519	ELF1	6985.06	10609	6439.05	7963.18
P32780	GTF2H1	158414	166299	139574	152211
P32856	STX2	3995.99	7576.74	10443	6190.13
P32929	CTH	492446	411506	586417	477934
P32969	RPL9	2.89939e+06	2.87561e+06	2.99502e+06	3.05463e+06
P32970	CD70	93989.9	92688.8	105113	97848.1
P33121	ACSL1	407456	405092	355356	382841
P33176	KIF5B	264163	252272	296335	263901
P33240	CSTF2	688001	718651	623153	692302
P33316	DUT	1.56349e+06	1.44269e+06	1.64943e+06	1.60982e+06
P33527	ABCC1	286476	304187	255358	264220
P33552	CKS2	106172	101490	109602	127167
P33897	ABCD1	528183	552197	473089	491488
P33947	KDELR2	76701.8	107105	102672	91066.6
P33981	TTK	52280.4	46397.5	49972.3	51812.5
P33991	MCM4	1.50045e+06	1.39979e+06	1.43996e+06	1.35436e+06
P33992	MCM5	3.63942e+06	3376060	3.60005e+06	3.17638e+06
P33993	MCM7	1.71186e+06	1595335	1.69856e+06	1.61001e+06
P34059	GALNS	70437.6	70113.1	74303.6	71447.2
P34741	SDC2	48464.9	46563.7	56298.5	48556.4
P34896	SHMT1	895677	845214	941153	886129
P34897	SHMT2	5.27516e+06	5.06595e+06	4.9652e+06	5.11664e+06
P34913	EPHX2	70649.5	74166.6	66456.8	67175.6
P34931	HSPA1L	120012	89982.8	138760	151295
P34932	HSPA4	1.84115e+06	1.7258e+06	2.2867e+06	2.25979e+06
P34949	MPI	48247	42011.1	60119.1	53736.7
P35052	GPC1	924298	937777	796828	882687
P35080	PFN2	810674	739821	849358	832691
P35221	CTNNA1	311909	304651	311231	300121
P35222	CTNNB1	674422	698221	631719	672216
P35226	BMI1	134018	143712	119713	121422
P35227	PCGF2	13797.1	16383.3	11870.6	19956.9
P35232	PHB	7.72767e+06	7655081	7.17031e+06	7.43348e+06
P35237	SERPINB6	583414	478782	631988	655135
P35240	NF2	39036.6	39701	34929	35072.1
P35241	RDX	2.52325e+06	2.34061e+06	2.83686e+06	2.74463e+06
P35244	RPA3	452642	410568	510352	495896
P35249	RFC4	798331	812652	729389	702065
P35250	RFC2	768658	754437	714871	705574
P35251	RFC1	143589	127900	156174	89906.6
P35268	RPL22	5.05343e+06	5174912	5.70244e+06	6.08965e+06
P35269	GTF2F1	212235	192607	235449	214697
P35270	SPR	296477	287318	290194	290744
P35354	PTGS2	132698	139586	133655	126778
P35527	KRT9	81046.8	100362	168022	154031
P35544	FAU	6439.56	8736.52	12480.5	10939.9
P35555	FBN1	24794.6	26472.9	18770.2	26403
P35556	FBN2	241817	259191	187901	236795
P35573	AGL	478750	478673	561500	538967
P35579	MYH9	764779	767959	892804	876749
P35580	MYH10	1.40284e+06	1.37593e+06	1.32668e+06	1.32965e+06
P35606	COPB2	1.11192e+06	1.1289e+06	1.19746e+06	1.20939e+06
P35609	ACTN2	3.19266e+06	2.26495e+06	4.15196e+06	3.04202e+06
P35610	SOAT1	706172	691588	668688	563631
P35611	ADD1	263162	268050	273014	286597
P35612	ADD2	33833.4	40427.4	38866.5	43647.5
P35613	BSG	8.36891e+06	8.32346e+06	7.14345e+06	8.10622e+06
P35625	TIMP3	77317.9	61725.4	66082.5	62173
P35637	FUS	4.12009e+06	4.27698e+06	4.07573e+06	4.48932e+06
P35658	NUP214	673687	687984	586010	605618
P35659	DEK	1.68892e+06	1.67302e+06	1.5786e+06	1.50241e+06
P35670	ATP7B	18757	16818.4	18961.5	17630.1
P35680	HNF1B	21901.4	16798.5	18000.3	19013.8
P35749	MYH11	205548	259968	267392	237085
P35754	GLRX	82590.9	72648.6	92360.2	90146.5
P35813	PPM1A	85946.7	81387.1	96460.8	92992.1
P35908	KRT2	51021.6	89497.6	92028.1	134126
P35914	HMGCL	229696	225203	227431	224889
P35998	PSMC2	1.19559e+06	1.19943e+06	1.34962e+06	1.39086e+06
P36269	GGT5	19000.3	26644.2	23464.2	17992
P36383	GJC1	16767.3	17988.8	16903	16252.9
P36404	ARL2	154254	131236	144498	142462
P36405	ARL3	256093	229150	274036	277669
P36507	MAP2K2	136682	117714	143238	139425
P36542	ATP5F1C	3.53495e+06	3.35429e+06	3.2824e+06	3.36781e+06
P36543	ATP6V1E1	462971	415737	354384	340843
P36551	CPOX	452014	440302	358528	375514
P36578	RPL4	7.69891e+06	7553954	7.96802e+06	9.37006e+06
P36639	NUDT1	132579	117601	133256	127696
P36776	LONP1	2.99776e+06	2.85514e+06	2.59631e+06	2.89316e+06
P36871	PGM1	1.61879e+06	1.43501e+06	1.82054e+06	1.74973e+06
P36873	PPP1CC	3.04569e+06	3.08339e+06	2.83861e+06	3.09513e+06
P36897	TGFBR1	55516.8	65639.5	59734.7	52405.1
P36915	GNL1	86597.5	77269.5	97572.4	89656.8
P36941	LTBR	39602	39028.5	43207.1	45618.5
P36952	SERPINB5	313387	302388	376461	343869
P36954	POLR2I	198923	221498	206045	209610
P36956	SREBF1	27434.7	14444.3	26187.9	12897.1
P36957	DLST	2.6157e+06	2.72864e+06	2.44046e+06	2.61564e+06
P36959	GMPR	26470.2	22948	36284.6	23181.2
P36969	GPX4	455363	405833	462998	458828
P37059	HSD17B2	23746.2	24438.7	23067.7	21428.4
P37108	SRP14	2.14217e+06	2.06627e+06	2.21449e+06	2.08479e+06
P37198	NUP62	590077	615617	480704	561824
P37235	HPCAL1	1.32771e+06	1.36812e+06	1.22854e+06	1.23484e+06
P37268	FDFT1	762550	797202	674911	667947
P37275	ZEB1	20167.1	22169.3	21895.9	18669.2
P37287	PIGA	57859.2	60489.1	61918.7	52076.1
P37802	TAGLN2	3.47905e+06	3.13663e+06	4.08892e+06	3.94045e+06
P37837	TALDO1	1.01762e+06	916490	1.33562e+06	1.13393e+06
P37840	SNCA	263427	240040	247158	220123
P38117	ETFB	4.65552e+06	4.58061e+06	4.13479e+06	4.4587e+06
P38159	RBMX	8.25599e+06	8424777	8.55335e+06	7.65208e+06
P38398	BRCA1	59888.3	62879.9	51334.2	51488.7
P38432	COIL	371447	384233	346594	349050
P38435	GGCX	249505	264769	259615	208752
P38571	LIPA	121596	119934	116270	113713
P38606	ATP6V1A	789986	731487	662336	695185
P38646	HSPA9	1.78218e+07	17415770	1.66327e+07	1.75009e+07
P38919	EIF4A3	3.23059e+06	3.15254e+06	3.2721e+06	3.32004e+06
P38935	IGHMBP2	62642.8	66070	72676.8	58728.2
P39019	RPS19	4.05393e+06	4.13752e+06	4.26901e+06	4.57667e+06
P39023	RPL3	5.41671e+06	5287649	5.65637e+06	6.19094e+06
P39060	COL18A1	27014.8	23246.7	23208.7	22435.1
P39210	MPV17	83260.7	89827.7	71372.2	56700.8
P39656	DDOST	2.53654e+06	2.65642e+06	2.5293e+06	2.20982e+06
P39687	ANP32A	1.12882e+06	1.13254e+06	1.21505e+06	1.05625e+06
P39748	FEN1	1.91315e+06	1.7232e+06	2.13566e+06	1.85932e+06
P39880	CUX1	262002	272964	228217	244301
P40121	CAPG	516567	492240	569682	581173
P40123	CAP2	56527.6	60613.5	64621.3	64426.9
P40189	IL6ST	39141.9	37854.4	47482	45121.1
P40222	TXLNA	176308	181299	179945	192804
P40227	CCT6A	1.37902e+06	1.31353e+06	1.66038e+06	1.65084e+06
P40261	NNMT	419695	353759	466853	445260
P40306	PSMB10	36251.4	40964.3	97269.7	43794.2
P40337	VHL	47514.3	42368.3	44516	39411.5
P40424	PBX1	113185	110776	96118.4	96645.8
P40426	PBX3	42173.8	59637.4	57634.9	55191.4
P40429	RPL13A	4.47036e+06	3.83393e+06	4.20032e+06	4.3725e+06
P40616	ARL1	282985	268159	364778	326000
P40692	MLH1	102885	106171	116791	99918.7
P40763	STAT3	338163	322524	363629	351796
P40818	USP8	69071.2	64171	73090.3	70099.1
P40855	PEX19	109834	111949	121193	123381
P40925	MDH1	2.98528e+06	2.76539e+06	3.44963e+06	3.11224e+06
P40926	MDH2	1.6437e+07	15975019	1.56745e+07	1.69297e+07
P40937	RFC5	516880	505212	453013	442137
P40938	RFC3	387262	391997	352960	338394
P40939	HADHA	3.90039e+06	3.80164e+06	3.65108e+06	3.67962e+06
P41091	EIF2S3	2.22207e+06	2.17834e+06	2.25039e+06	2.34408e+06
P41134	ID1	14497.7	9159.91	20887.7	19730.2
P41208	CETN2	121835	135041	108474	124338
P41212	ETV6	27553.2	18385.4	35080.5	24956
P41214	EIF2D	148597	164044	169958	171618
P41221	WNT5A	44406.1	39081.3	41482.5	56372.5
P41223	BUD31	339253	349625	403603	429308
P41227	NAA10	285698	310143	311088	360679
P41229	KDM5C	56084.3	60932.8	78347.4	62178.9
P41236	PPP1R2	79472.3	78198.7	82639.2	76305.3
P41240	CSK	593108	539895	645103	612619
P41247	PNPLA4	201976	194236	176342	177727
P41250	GARS1	745477	693862	768884	791998
P41252	IARS1	967318	988493	1.12111e+06	1.14061e+06
P41273	TNFSF9	121330	114127	113307	113079
P41440	SLC19A1	86206.4	94932.7	80485.5	88193.9
P41567	EIF1	233385	244595	248300	264641
P41732	TSPAN7	68236.5	61468.1	65725.6	59606.5
P41743	PRKCI	119001	113927	108388	115091
P42025	ACTR1B	25664.4	20913.4	25266.3	29668.3
P42126	ECI1	1.73045e+06	1.73905e+06	1.69178e+06	1.71309e+06
P42166	TMPO	881757	891258	841741	806833
P42167	TMPO	3.94712e+06	3.87665e+06	3.99064e+06	3.3297e+06
P42224	STAT1	217179	204919	243308	236948
P42226	STAT6	39676.1	34855.7	39640.3	40220.8
P42229	STAT5A	127195	102060	146473	124668
P42285	MTREX	741222	755219	695303	734300
P42330	AKR1C3	494745	390643	551580	560958
P42338	PIK3CB	14661.4	16003.2	18554.4	21920.1
P42345	MTOR	164055	172395	191950	188744
P42356	PI4KA	83634.6	77999.1	73327.8	76352.6
P42566	EPS15	54331.7	57845.6	60647.9	57547.1
P42568	MLLT3	43668.7	36499.5	38691.8	39622.6
P42574	CASP3	86353.6	70951.7	109723	92197.7
P42575	CASP2	42555.6	31986.8	30957.6	40453.1
P42677	RPS27	1.06267e+06	1.09942e+06	1.10762e+06	1.13928e+06
P42684	ABL2	7290.81	6659.61	11192.5	5127.71
P42694	HELZ	61062.4	58997	59639	61643.4
P42695	NCAPD3	154558	167723	157189	136175
P42696	RBM34	264614	221208	232711	213910
P42702	LIFR	206571	230470	207843	209521
P42704	LRPPRC	4.1227e+06	4.10015e+06	3.78049e+06	3.96754e+06
P42765	ACAA2	3.16189e+06	3.14191e+06	3.00116e+06	3.23555e+06
P42766	RPL35	4.4057e+06	4568241	4.47192e+06	4.67037e+06
P42771	CDKN2A	358029	323011	414099	415136
P42785	PRCP	346486	342391	337067	334756
P42858	HTT	63673.5	62093.6	69758.6	67865.2
P42892	ECE1	163483	163861	158945	162874
P43003	SLC1A3	421574	385345	368127	393583
P43005	SLC1A1	84441.5	90095.2	73101.4	79182.3
P43007	SLC1A4	115196	124534	110750	113012
P43034	PAFAH1B1	507411	433166	556042	547233
P43121	MCAM	11032.5	11976.9	16705.8	8993.44
P43155	CRAT	249934	247362	234700	233684
P43243	MATR3	5.04737e+06	5.17108e+06	4.60185e+06	5.0637e+06
P43246	MSH2	527410	495268	654022	603950
P43250	GRK6	34004.9	36526.1	30811	22853.4
P43251	BTD	273913	287449	232330	238946
P43304	GPD2	1.81486e+06	1.85709e+06	1.644e+06	1.75975e+06
P43307	SSR1	1.96137e+06	2.14717e+06	2.09413e+06	2.02056e+06
P43353	ALDH3B1	329559	354296	330278	339426
P43360	MAGEA6	25146.9	25411.4	25846.6	29689.4
P43378	PTPN9	54736	64838.4	72840.2	71102.5
P43487	RANBP1	1.06946e+06	962772	1.16081e+06	1.17804e+06
P43490	NAMPT	405085	358894	442344	433026
P43686	PSMC4	871409	925062	984541	969352
P43699	NKX2-1	42851.8	40671	39509.3	36031.3
P43897	TSFM	1.70026e+06	1.63271e+06	1.54243e+06	1.63161e+06
P45877	PPIC	451091	452802	504282	491523
P45880	VDAC2	8.45749e+06	8685176	7.88196e+06	8.43947e+06
P45954	ACADSB	441222	441299	379737	435083
P45973	CBX5	1.6458e+06	1.71036e+06	1.55226e+06	1.67925e+06
P45974	USP5	561320	522463	654622	614535
P45983	MAPK8	24850.8	24019.2	30400.9	27870.6
P45984	MAPK9	21818.8	24154.3	21826	20280.4
P45985	MAP2K4	15868.7	8777.62	14825.5	14213.2
P46013	MKI67	380074	454613	565607	258337
P46019	PHKA2	31681.3	40378.1	63289.4	52188.6
P46020	PHKA1	64344	49510.1	59990.1	48633.9
P46060	RANGAP1	1.52676e+06	1.52362e+06	1.39865e+06	1.54507e+06
P46063	RECQL	714587	753946	835337	782214
P46087	NOP2	1.26784e+06	1.19988e+06	1.18484e+06	972873
P46100	ATRX	132933	140934	127391	135266
P46108	CRK	95001.8	84029.7	105945	104169
P46109	CRKL	252770	221055	276954	256972
P46199	MTIF2	366581	376641	347222	352670
P46379	BAG6	381008	387276	420911	419099
P46459	NSF	1.76294e+06	1.83355e+06	1.49323e+06	1.697e+06
P46734	MAP2K3	77035.8	60813.2	87368.3	78213.9
P46736	BRCC3	129095	123554	120976	116996
P46776	RPL27A	8.32361e+06	8295424	7.82399e+06	8.64645e+06
P46777	RPL5	4.23081e+06	4.04655e+06	4.2176e+06	4.50987e+06
P46778	RPL21	4.1942e+06	4.26687e+06	4.62469e+06	4.86033e+06
P46779	RPL28	4.44975e+06	4.50464e+06	4.4726e+06	5.07204e+06
P46781	RPS9	4.60006e+06	3.73867e+06	4.97883e+06	4.96765e+06
P46782	RPS5	4.23161e+06	4.27225e+06	4.20677e+06	3.93349e+06
P46783	RPS10	5.0485e+06	4.83613e+06	5.12797e+06	5.37009e+06
P46926	GNPDA1	354141	267410	375154	383645
P46934	NEDD4	69180.9	67565.1	64344.2	68306.6
P46937	YAP1	265302	266908	272222	288178
P46939	UTRN	81418.3	83547.1	77625.9	89391
P46940	IQGAP1	2.81514e+06	2809240	3.29554e+06	2.98451e+06
P46976	GYG1	353225	327610	415625	398358
P46977	STT3A	1.67854e+06	1.90435e+06	1.72818e+06	1.41425e+06
P47224	RABIF	74169	77404.3	84435.2	79118.7
P47712	PLA2G4A	1.19926e+06	1.29609e+06	1.05118e+06	1.15175e+06
P47755	CAPZA2	711469	731146	636868	701308
P47756	CAPZB	1.82627e+06	1.84525e+06	1.77165e+06	1.94335e+06
P47813	EIF1AX	664283	697872	842953	851851
P47895	ALDH1A3	223365	219336	257086	271596
P47897	QARS1	680601	706332	768651	783092
P47914	RPL29	5.47335e+06	5.81034e+06	6.01999e+06	6.41343e+06
P47972	NPTX2	191505	182878	295092	196404
P47985	UQCRFS1	916788	970349	855796	981047
P48029	SLC6A8	257745	290312	253339	244910
P48047	ATP5PO	4.6048e+06	4450412	4.34478e+06	4.40381e+06
P48059	LIMS1	197968	157923	201234	216230
P48060	GLIPR1	33744.9	32527.2	21439.1	29350.6
P48067	SLC6A9	176041	188638	158915	153916
P48147	PREP	195584	173126	213279	213816
P48163	ME1	186892	171299	180124	190631
P48200	IREB2	28307.5	26142.2	36448.4	29635
P48380	RFX3	28120.2	32348.7	31592.2	34149.3
P48382	RFX5	76671.2	79640.6	71400.9	69859.5
P48426	PIP4K2A	52242.2	49893.4	54239.1	48574.2
P48444	ARCN1	937160	989920	1.08355e+06	1.0732e+06
P48449	LSS	380923	373584	364454	373895
P48454	PPP3CC	28257.1	25588.5	35676.3	32248.7
P48506	GCLC	115432	101151	116433	101911
P48507	GCLM	257000	228407	245278	249597
P48509	CD151	731985	858637	755226	888170
[truncated: 5,559 more rows]

## Sheet: DDA_D
Protein_ID	Genename	C1_1	C1_2	D_1	D_2
A0A024QZ33	CCDC55	74863000	6.34115e+07	8.83451e+07	6.56449e+07
A0A024R161	hCG_1994888	43301000	4.86833e+07	2.17178e+07	8.58094e+06
A0A024R4E5	HDLBP	2716100000	3.251e+09	3.06895e+09	3.75684e+09
A0A024R571	EHD1	722400000	4.61145e+08	9.39621e+08	8.32323e+08
A0A024RA52	PSMA2	2035300000	1.65037e+09	2.81098e+09	2.5096e+09
A0A024RAC6	TCEB3	52195000	4.3644e+07	3.67457e+07	1.32775e+07
A0A024RCL3	MICA	69502000	3.87246e+07	6.13294e+07	4.3252e+07
A0A067XG54	ATP11C	249620000	2.35993e+08	1.65245e+08	2.80478e+08
A0A075B6F3	DNAH8	75439000	7.17789e+07	4.24865e+07	5.33577e+07
A0A075B730	EPPK1	1545500000	1.04263e+09	1.59752e+09	1.75543e+09
A0A087WT04	PMF1-BGLAP	30210000	1.27677e+07	2.96926e+07	1.13551e+07
A0A087WT20	DCAF13	750860000	7.96138e+08	7.00057e+08	5.56253e+08
A0A087WT35	PIP4K2B	10159000	1.5806e+07	1.49756e+07	1.33256e+07
A0A087WT45	GRIPAP1	20965000	1.35358e+07	3.71263e+06	1.06248e+07
A0A087WTK0	PTPRJ	35837000	5.55939e+07	2.59492e+07	4.51335e+07
A0A087WTU3	TEX264	89186000	6.01431e+07	5.33271e+07	5.00981e+07
A0A087WTV6	PYCR2	1179600000	1.45287e+09	1.07204e+09	1.01813e+09
A0A087WU02	ERGIC2	252010000	2.88571e+08	3.00457e+08	1.25019e+08
A0A087WU07	MINOS1	370710000	3.5069e+08	3.90879e+08	4.0062e+08
A0A087WU53	MAGT1	587170000	4.80984e+08	6.20823e+08	5.07589e+08
A0A087WU65	VPS45	273540000	2.50444e+08	3.72226e+08	2.34371e+08
A0A087WUB9	CTNNBL1	629450000	4.76805e+08	3.15157e+08	2.58759e+08
A0A087WUD3	OSTC	468550000	5.10708e+08	4.55303e+08	4.83523e+08
A0A087WUQ6	GPX1	1142200000	1.2932e+09	1.24693e+09	1.3061e+09
A0A087WUT6	EIF5B	1655000000	1.65443e+09	2.0179e+09	2.2978e+09
A0A087WV29	NAT10	1599700000	1.10996e+09	9.66674e+08	9.67272e+08
A0A087WV34	GLMP	126300000	1.08704e+08	1.0559e+08	2.22181e+07
A0A087WV67	UBXN8	20987000	2.57484e+07	1.77369e+07	1.12517e+07
A0A087WVA1	SELT	53645000	6.62323e+07	3.85047e+08	8.80065e+07
A0A087WVA8	TEX2	51848000	4.52561e+07	5.66808e+07	3.86161e+07
A0A087WVD1	LENG9	1.20587e+07	2.29078e+07	1.6176e+07	8.06457e+06
A0A087WVD7	TAF9	5108000	4.35708e+06	2.02102e+07	5.71709e+06
A0A087WVK0	CLK1	61881000	4.54691e+07	1.12278e+07	3.3355e+07
A0A087WVM4	MTHFD1L	1507500000	1.8216e+09	1.34175e+09	1.384e+09
A0A087WVQ6	CLTC	30111000000	3.0193e+10	3.1203e+10	3.17778e+10
A0A087WVR3	UHRF1	1032300000	1.34456e+09	1.50618e+09	1.10882e+09
A0A087WVZ9	POLR2E	580210000	8.09876e+08	6.4883e+08	8.15708e+08
A0A087WW40	SH3GLB1	105690000	6.04338e+07	7.79282e+07	2.21816e+07
A0A087WW77	LLGL1	68993000	8.05182e+07	2.95349e+07	3.44827e+07
A0A087WW88	CHMP2B	35685000	3.05351e+07	1.22815e+07	1.41607e+07
A0A087WWF1	SELM	118080000	2.52393e+08	2.37051e+08	2.84156e+08
A0A087WWF6	POLD2	188340000	1.77033e+08	1.93298e+08	1.63736e+08
A0A087WWM0	TRAPPC3	27325000	3.34948e+07	5.11436e+07	6.32636e+06
A0A087WWS1	THOC1	697820000	6.91649e+08	7.30898e+08	8.00144e+08
A0A087WX92	SLC16A6	43083000	5.96647e+07	4.85978e+07	8.68684e+07
A0A087WXC5	NDUFA10	1036800000	9.4388e+08	1.48151e+09	1.4646e+09
A0A087WXF7	ING1	1.33256e+07	1.11188e+07	1.56891e+07	2.2452e+07
A0A087WXK8	FAM83D	8556900	7.15812e+06	1.54534e+07	1.21113e+07
A0A087WXM6	RPL17	6065000000	7.61106e+09	6.09406e+09	6.4312e+09
A0A087WXP3	ITGB6	655760000	5.11466e+08	5.56638e+08	4.27556e+08
A0A087WXU0	RMND1	78692000	6.66375e+07	5.83416e+07	5.19223e+07
A0A087WY55	VTA1	223410000	2.8589e+08	2.30595e+08	2.08331e+08
A0A087WY71	AP2M1	772960000	6.7681e+08	7.426e+08	7.35631e+08
A0A087WY82	F11R	657840000	6.54993e+08	4.84062e+08	4.84983e+08
A0A087WYL5	SEZ6L2	55052000	4.95156e+07	6.61836e+06	1.72883e+07
A0A087WYN9	DHX29	8066300	1.12169e+07	1.55268e+07	4.2646e+07
A0A087WYP2	C11orf31	140570000	1.18443e+08	4.43069e+07	4.7202e+07
A0A087WYS1	UGP2	705310000	6.7996e+08	1.06884e+09	1.1449e+09
A0A087WYT5	RAB4A	20602000	2.77586e+07	1.31928e+07	9.45361e+06
A0A087WZ13	RAVER1	669520000	4.03439e+08	5.17837e+08	5.94648e+08
A0A087WZA9	TMEM120A	21382000	2.34557e+07	2.46139e+07	2.25989e+07
A0A087WZF1	LPP	67820000	7.8564e+07	1.48931e+08	1.06456e+08
A0A087WZG9	PEG10	88133000	6.65518e+07	1.5182e+08	7.85485e+07
A0A087WZM2	RNASET2	53856000	7.69997e+07	4.18547e+07	3.21951e+07
A0A087WZN1	IDH3B	2012600000	1.97468e+09	2.08109e+09	2.11261e+09
A0A087X0K1	CAB39	109530000	7.60457e+07	9.11651e+07	1.32131e+08
A0A087X0L7	OXA1L	490950000	5.81465e+08	5.6026e+08	4.43858e+08
A0A087X0P0	CENPE	8.94859e+06	1.01985e+07	2.3607e+07	2.53864e+07
A0A087X0Q1	YTHDF3	486980000	5.71807e+08	4.74515e+08	4.91174e+08
A0A087X0Q9	SELO	9.21724e+06	1.63322e+07	1.15724e+07	9.07192e+06
A0A087X0R6	SNX12	188560000	1.89715e+08	1.83779e+08	1.7057e+08
A0A087X0S5	COL6A1	108820000	1.73955e+08	1.42108e+08	2.11191e+08
A0A087X0W7	ACOT2	227410000	3.00847e+08	2.22736e+08	2.30728e+08
A0A087X0W9	OTUD6B	19110000	1.47887e+07	2.33089e+07	1.88264e+07
A0A087X0X0	MID1	11713000	1.1968e+07	1.53384e+07	2.14408e+07
A0A087X142	SEPT8	88593000	6.96027e+07	7.29513e+07	7.96806e+07
A0A087X1B2	USP39	1603200000	8.35321e+08	8.78985e+08	8.81021e+08
A0A087X1E4	ARFIP2	29237000	2.74715e+07	9.91068e+07	1.10491e+08
A0A087X1G7	45915	279920000	2.89392e+08	2.66067e+08	3.12692e+08
A0A087X1S3	HUWE1	7.29697e+06	4.32946e+07	3.86459e+07	6.50546e+07
A0A087X1Z3	PSME2	1860800000	8.64674e+08	1.38651e+09	1.66058e+09
A0A087X256	KIAA1033	21548000	2.89582e+07	1.03737e+07	1.10237e+07
A0A087X295	WDR6	81026000	6.92976e+07	9.46591e+07	2.22746e+07
A0A087X2D5	MRPL45	2199600000	3.20253e+09	2.21507e+09	2.57412e+09
A0A087X2D8	SPAG9	40402000	8.58798e+07	4.38915e+07	1.94837e+07
A0A087X2H1	HECTD1	35728000	3.29388e+07	1.94894e+07	5.16553e+06
A0A087X2I1	PSMC6	2425500000	2.02532e+09	1.97498e+09	1.93863e+09
A0A087X2I5	LSM7	155650000	1.65064e+08	1.58276e+08	2.13017e+08
A0A090HNM7	ERCC5-201	30337000	9.32326e+06	1.35477e+07	3.03128e+07
A0A096LNJ4	ALG13	18145000	5.26332e+07	4.85804e+07	6.91767e+07
A0A096LNZ9	ISG15	94699000	1.01419e+08	1.3932e+08	1.10517e+08
A0A096LP69	CD99	20867000	3.3252e+07	2.02992e+07	1.83577e+07
A0A096LPI6	C21orf33	1367000000	1.6139e+09	1.63604e+09	1.63936e+09
A0A0A0MQV6	FGF2	18583000	1.33309e+07	2.73935e+07	5.74755e+07
A0A0A0MR02	VDAC2	16189000000	1.71518e+10	1.60522e+10	1.57354e+10
A0A0A0MR85	GSTM4	76855000	6.1896e+07	1.11267e+08	9.12931e+07
A0A0A0MRA3	TTN	242750000	1.99617e+08	1.41842e+08	1.81821e+08
A0A0A0MRA5	HNRNPUL1	3327200000	3.42647e+09	3.92621e+09	3.27264e+09
A0A0A0MRE9	AKAP9	11320000	9.3368e+06	8.94859e+06	8.09199e+06
A0A0A0MRH8	CHD1L	14225000	9.75923e+06	2.60299e+07	7.46108e+06
A0A0A0MRI2	SNX6	172760000	2.06052e+08	3.28308e+08	2.72262e+08
A0A0A0MRI7	ARV1	20293000	2.97101e+07	1.01664e+07	1.12278e+07
A0A0A0MRJ6	PCMT1	940450000	8.01851e+08	1.30663e+09	1.09769e+09
A0A0A0MRM9	NOLC1	3226600000	3.95866e+09	3.36782e+09	3.15961e+09
A0A0A0MRV9	FAM219A	14933000	1.74659e+07	1.30755e+07	9.26338e+06
A0A0A0MS59	SRCAP	3239500000	4.18947e+09	3.7483e+09	3.08562e+09
A0A0A0MS97	CCDC178	211120000	3.92184e+07	1.12615e+08	1.39861e+08
A0A0A0MSA7	EIF4G3	11676000	1.56913e+07	6.37459e+06	1.05491e+07
A0A0A0MSA9	PVR	162600000	2.72567e+08	1.94399e+08	2.47935e+08
A0A0A0MSB8	EXOC7	43552000	4.04432e+07	4.41235e+07	2.76314e+07
A0A0A0MSE9	PLEKHB2	1.24259e+07	1.52905e+07	1.0781e+07	1.50634e+07
A0A0A0MSK5	TOR1AIP1	1420000000	1.97198e+09	1.58367e+09	1.18081e+09
A0A0A0MSS8	AKR1C3	1725300000	7.23963e+08	1.29131e+09	1.80212e+09
A0A0A0MSU2	ELMSAN1	48566000	6.2304e+07	5.35591e+07	2.30137e+07
A0A0A0MSW4	PITPNB	221750000	1.82322e+08	4.60218e+08	2.77818e+08
A0A0A0MT32	LIPA	147280000	1.71716e+08	6.45813e+07	1.21455e+08
A0A0A0MT33	SCAF8	71806000	8.81445e+07	4.95672e+07	3.50574e+07
A0A0A0MTB8	WDR36	1935800000	1.56877e+09	1.4706e+09	1.36548e+09
A0A0A0MTH3	ILK	346890000	3.55058e+08	3.33407e+08	2.39718e+08
A0A0A0MTI1	DHCR24	1127300000	1.1569e+09	1.42108e+09	1.05752e+09
A0A0A0MTI6	ELOVL5	295690000	3.27998e+08	4.00912e+08	3.02789e+08
A0A0A0MTL5	SKP2	14942000	1.86113e+07	3.79031e+07	1.3321e+07
A0A0A0MTP6	INPPL1	18415000	1.21993e+07	4.94525e+07	1.64945e+07
A0A0A0MTQ5	C14orf2	480120000	7.57947e+08	5.21872e+08	6.09977e+08
A0A0A0MTR7	RNF213	7.99091e+06	1.14219e+07	1.47985e+07	5.97743e+06
A0A0A0MTU3	TMEM259	17643000	3.26842e+07	1.98104e+07	1.79152e+07
A0A0A6YYA0	TMED7-TICAM2	737360000	7.64681e+08	1.07975e+09	1.13238e+09
A0A0A6YYC7	ZFP91-CNTF	36890000	1.00706e+08	9.80522e+07	5.7965e+07
A0A0A6YYG7	NCAPH2	106020000	8.4145e+07	4.67646e+07	8.76413e+07
A0A0A6YYI3	PPAN-P2RY11	505810000	3.1871e+08	5.115e+08	2.9978e+08
A0A0A6YYL2	SULT1A4	41312000	2.01575e+07	4.26718e+07	3.37063e+07
A0A0B4J1S3	BIRC5	12548000	6.85701e+07	8.14295e+07	6.09916e+07
A0A0B4J1T6	CBWD1	7.88733e+06	1.17061e+07	1.47674e+07	1.42469e+07
A0A0B4J1V9	HELLS	74745000	8.51469e+07	1.97856e+07	1.53955e+07
A0A0B4J1W0	MED24	24959000	2.38051e+07	7.23846e+07	6.17384e+07
A0A0B4J1Z1	SRSF7	6823500000	8.56271e+09	6.24161e+09	5.85275e+09
A0A0B4J287	COMMD4	44164000	1.7539e+07	4.14824e+07	1.53633e+07
A0A0B4J2F8	POLR2J3	23604000	2.34034e+07	4.11788e+07	4.07306e+07
A0A0C4DFL7	CYP51A1	747270000	7.72443e+08	6.77479e+08	5.65156e+08
A0A0C4DFM1	TM9SF4	373200000	4.46585e+08	3.27895e+08	3.92873e+08
A0A0C4DFN3	MGLL	225630000	1.76275e+08	1.97975e+08	1.45773e+08
A0A0C4DFX9	NELFA	105190000	1.36171e+08	1.82293e+08	1.00805e+08
A0A0C4DFZ2	ARSA	12341000	1.21097e+07	3.14735e+07	9.66267e+06
A0A0C4DG33	PEX1	10868000	1.79858e+07	3.32325e+07	1.39287e+07
A0A0C4DG51	PNPLA8	194690000	1.5296e+08	1.83834e+08	1.88159e+08
A0A0C4DG80	KLHL13	8002800	2.43358e+07	1.11881e+07	9.64402e+06
A0A0C4DG89	DDX46	3185300000	3.41068e+09	3.06115e+09	3.24047e+09
A0A0C4DGA2	ECI2	1725100000	1.66165e+09	1.60183e+09	1.81065e+09
A0A0C4DGA6	HLTF	212990000	1.34925e+08	2.49679e+08	1.53911e+08
A0A0C4DGB0	SCOC	221120000	1.08622e+07	4.34861e+07	4.22539e+07
A0A0C4DGB5	CAST	638490000	5.16927e+08	6.88979e+08	6.19219e+08
A0A0C4DGH0	CD276	62705000	1.43536e+08	8.37589e+07	1.30167e+08
A0A0C4DGQ5	CAPNS1	1179300000	1.01176e+09	9.31092e+08	1.12299e+09
A0A0C4DGQ8	DHRS7B	367460000	3.11019e+08	1.8521e+08	2.04123e+08
A0A0C4DGS1	DDOST	9600700000	6.26353e+09	8.91145e+09	6.73065e+09
A0A0C4DGS9	CEPT1	70070000	7.10153e+07	6.00501e+07	4.52657e+07
A0A0C4DGT8	RSBN1	73948000	1.23624e+08	4.79568e+07	9.67532e+07
A0A0C4DGZ1	ZC3H8	25935000	4.74368e+07	1.01664e+07	2.74392e+07
A0A0C4DH01	POLR3E	22670000	2.51608e+07	1.02954e+07	1.04779e+07
A0A0D9SEI0	C6orf203	1.45934e+07	1.41607e+07	2.86646e+07	2.81452e+07
A0A0D9SEN2	CDK11B	393120000	4.5006e+08	3.50382e+08	5.40551e+08
A0A0D9SEU5	RANBP10	10825000	3.08248e+07	1.9195e+07	1.6551e+07
A0A0D9SFK2	MYO18A	223910000	3.01171e+08	2.26597e+08	2.25276e+08
A0A0D9SG71	UBE2A	63139000	5.62582e+07	7.08778e+07	6.65092e+07
A0A0D9SG77	UBE3A	31212000	1.31116e+07	1.67995e+07	1.10777e+07
A0A0D9SGH0	SLC9A6	78027000	6.68849e+07	1.31112e+08	6.28209e+07
A0A0G2JHC2	PPP1R18	1061800000	9.25286e+08	9.89509e+08	8.96063e+08
A0A0G2JIS2	EHMT2	273740000	1.39213e+08	2.00057e+08	1.67727e+08
A0A0G2JIW1	HSPA1B	14427000000	1.54909e+10	1.56992e+10	1.34696e+10
A0A0G2JJD3	ABHD16A	173020000	1.75164e+08	2.08384e+08	1.58772e+08
A0A0G2JKZ1	TAPBP	539250000	6.00655e+08	6.28343e+08	5.3489e+08
A0A0G2JLV0	TAP2	468000000	5.61508e+08	4.90509e+08	3.3688e+08
A0A0G2JN29	NOMO1	3578200000	3.44344e+09	3.35507e+09	3.58382e+09
A0A0G2JNW7	SLC12A7	209670000	3.53623e+08	2.57465e+08	1.93541e+08
A0A0G2JNZ2	SCRIB	658800000	6.18013e+08	8.08463e+08	5.71103e+08
A0A0G2JR96	NA	35082000	1.01961e+07	2.88159e+07	2.5003e+07
A0A0J9YX88	PHRF1	49379000	5.57139e+07	4.07029e+07	3.32237e+07
A0A0J9YXF2	PON2	1792300000	1.25032e+09	1.64851e+09	1.56589e+09
A0A0J9YYJ3	TMEM184B	1.01828e+07	1.09674e+07	4.65152e+07	2.73749e+07
A0A0M3HER1	LIMS1	49320000	5.42905e+07	8.26355e+07	6.42147e+07
A0A0S2Z4K7	IVD	21045000	5.23868e+07	3.38579e+07	6.82777e+06
A0A0U1RQT8	CD99L2	83069000	2.56239e+07	2.83427e+07	2.90181e+07
A0A0U1RR32	HIST1H2AJ	56262000000	3.04042e+10	3.07252e+10	1.85838e+10
A0A0U1RRH6	PHF14	147340000	1.35142e+08	2.12538e+08	1.71196e+08
A0A0U1RRI6	NA	69006000	8.15102e+07	8.47264e+07	7.69905e+07
A0A0U1RRL7	NA	181540000	1.70543e+08	1.26114e+08	1.43782e+08
A0A0U1RRM1	GATAD2B	739500000	7.02246e+08	4.88234e+08	6.12855e+08
A0A0U1RRM4	PTBP1	15011000000	1.38581e+10	1.91519e+10	1.62554e+10
A0A0U1RRM6	ENAH	207350000	2.58071e+08	2.19398e+08	2.9605e+08
A0A140T8Z0	DIAPH1	567550000	4.70144e+08	6.32323e+08	7.01331e+08
A0A140T9L0	NA	46191000	2.9674e+07	3.21852e+07	2.64906e+07
A0A140TA09	RNF5	101170000	1.01627e+08	7.25286e+07	7.71018e+07
A0A140TA40	VARS2	84563000	8.46324e+07	3.40679e+07	2.37205e+07
A0A140TA86	QIL1	1531800000	6.54723e+08	8.25786e+08	6.1435e+08
A0A182DWF3	TXNRD2	1088400000	6.62232e+08	9.17337e+08	1.00492e+09
A0A182DWI4	VIMP	47268000	5.37751e+07	9.38429e+07	7.93458e+07
A0A1B0GTL5	RAB11FIP5	218240000	1.37615e+08	2.92313e+08	2.4217e+08
A0A1B0GTR1	PCCA	14793000	2.66808e+07	1.55524e+07	1.03935e+07
A0A1B0GTU7	POLG	173030000	1.59982e+08	1.53058e+08	1.01014e+07
A0A1B0GTY1	FTO	20095000	1.17531e+07	1.54314e+07	1.2459e+07
A0A1B0GU86	ACY1	59921000	2.69417e+07	4.21757e+07	7.72565e+07
A0A1B0GUA3	KIAA1279	97640000	4.48607e+07	9.07029e+07	5.97639e+07
A0A1B0GUD6	hCG_39893	59418000	5.35223e+07	3.10609e+07	8.83357e+06
A0A1B0GUZ7	EFR3A	27873000	3.6218e+07	1.91271e+07	2.15191e+07
A0A1B0GV47	KIF21A	7.95907e+06	2.35722e+07	4.24297e+07	5.53566e+07
A0A1B0GVD5	CTSD	2850200000	2.74174e+09	2.89113e+09	3.25395e+09
A0A1B0GVF3	CPT2	1904100000	2.19998e+09	1.77103e+09	1.69466e+09
A0A1B0GW05	DPY19L1	31998000	4.18504e+07	8.14932e+06	8.68641e+06
A0A1B0GW34	CLN3	105460000	2.0218e+08	7.19481e+07	6.31452e+07
A0A1B0GWF2	STXBP1	90285000	1.07982e+08	9.92352e+07	5.64043e+07
A0A1B0GWJ0	ADSL	879840000	8.76318e+08	1.21437e+09	8.00579e+08
A0A1C7CYX9	DPYSL2	1298800000	9.2321e+08	1.51774e+09	1.42269e+09
A0A1W2PNR9	IER3IP1	11422000	2.02947e+07	1.33038e+08	1.32375e+08
A0A1W2PNV4	NA	1370400000	1.21295e+09	1.42722e+09	1.14994e+09
A0A1W2PP04	RBMX2	40585000	3.26445e+07	1.5823e+07	1.68649e+07
A0A1W2PPH1	ME2	1516800000	9.42075e+08	1.22602e+09	1.46573e+09
A0A1W2PPX5	SCARB2	1364200000	1.08288e+09	1.07883e+09	1.29932e+09
A0A1W2PPZ5	TCEA1	313240000	3.00197e+08	3.42027e+08	2.53656e+08
A0A1W2PQ63	PHLDB2	28939000	5.21278e+07	1.25463e+07	2.8073e+07
A0A1W2PQV2	GCSH	1542500000	1.81808e+09	1.55249e+09	1.59711e+09
A0A1W2PR06	SLC7A2	249060000	3.12012e+08	2.20196e+08	2.46935e+08
A0A1W2PR36	GAMT	78673000	4.96212e+07	6.34946e+07	4.9273e+07
A0A1W2PRB8	MED17	50025000	3.83067e+07	7.9935e+06	1.08449e+07
A0A1X7SBZ2	DDX17	7980200000	8.08314e+09	6.6641e+09	6.76368e+09
A0A286YF22	PHGDH	2749000000	2.80691e+09	3.03593e+09	2.39475e+09
A0A286YFF8	MON2	9.63431e+06	1.89146e+07	1.70014e+07	1.48277e+07
A0A2R8Y425	CHD4	4479000000	3.90694e+09	4.95846e+09	4.14331e+09
A0A2R8Y484	CD47	127670000	1.75291e+08	1.2815e+08	1.12569e+08
A0A2R8Y4Z4	ABCC8	259260000	1.16665e+08	2.91433e+08	3.15978e+08
A0A2R8Y547	NME6	60118000	7.53398e+07	2.53861e+07	6.22662e+07
A0A2R8Y549	INADL	79172000	9.98579e+07	4.87051e+07	1.01231e+08
A0A2R8Y5B5	SLC19A2	11676000	1.88343e+07	1.1001e+07	1.31592e+07
A0A2R8Y5P7	HARS2	1049100000	1.12793e+09	7.06715e+08	7.32562e+08
A0A2R8Y5S7	RDX	1575600000	1.17956e+09	1.28985e+09	1.26532e+09
A0A2R8Y635	ATP13A3	56221000	9.11205e+07	3.85102e+07	6.33191e+07
A0A2R8Y653	UCK2	43007000	1.00084e+08	8.14947e+07	7.45012e+07
A0A2R8Y6J3	RPL5	11885000000	1.34059e+10	1.3235e+10	1.30114e+10
A0A2R8Y6Q1	TBCE	26499000	7.96501e+06	8.2397e+06	1.0004e+07
A0A2R8Y793	NA	74281000	1.0382e+08	4.13439e+07	3.63911e+07
A0A2R8Y804	CTNNB1	36507000	6.47718e+07	1.28122e+07	1.52325e+07
A0A2R8Y840	CHD8	59786000	5.02088e+07	2.39628e+07	1.12169e+07
A0A2R8Y851	RPS29	3139500000	2.48593e+09	2.91176e+09	3.35828e+09
A0A2R8Y891	PFKM	482380000	3.81469e+08	3.47016e+08	3.42227e+08
A0A2R8YD12	SERPINB6	665340000	5.487e+08	7.62922e+08	6.50163e+08
A0A2R8YD45	TPP1	1792600000	6.15115e+08	6.25849e+08	6.02969e+08
A0A2R8YD63	TOPBP1	11978000	6.58116e+06	1.10212e+07	1.77317e+07
A0A2R8YD71	SLC11A2	57875000	1.18091e+08	1.3114e+08	5.4428e+07
A0A2R8YD87	VPS13D	1620100000	1.3571e+09	1.40723e+09	1.88533e+09
A0A2R8YDQ9	SUCLA2	1196400000	1.04182e+09	1.21722e+09	1.24002e+09
A0A2R8YEA7	NA	13652000	2.69426e+07	1.3804e+07	9.07168e+06
A0A2R8YEL6	GCLC	25171000	9.28626e+06	3.01585e+07	3.45957e+07
A0A2R8YEM0	TSEN15	39329000	3.53398e+07	4.78458e+07	1.96228e+07
A0A2R8YEM2	CCNH	46956000	6.06856e+07	5.18993e+07	2.93625e+07
A0A2R8YEZ4	POLR1C	628690000	5.87323e+08	5.38251e+08	5.77772e+08
A0A2R8YF78	DDX3X	12183000000	1.34871e+10	1.08048e+10	1.12882e+10
A0A2R8YFH5	SEC23B	466620000	4.1159e+08	3.69145e+08	4.34364e+08
A0A2R8YFL0	CTCF	139890000	2.1618e+08	1.4883e+08	5.94605e+07
A0A2R8YFQ8	FAM73A	98301000	6.16713e+07	9.66766e+07	6.82924e+07
A0A2R8YGH5	AP1S1	116100000	1.11917e+08	1.15027e+08	1.17299e+08
A0A2R8YGW0	CLCN5	27616000	2.41002e+07	1.21098e+07	1.54763e+07
A0A2U3TZH3	EEF1A2	3177700000	2.18942e+09	3.78719e+09	4.26382e+09
A0A2U3TZL8	KIF23	172320000	2.94709e+08	1.36908e+08	8.5319e+07
A0A3B3IRI2	CTPS1	1231400000	1.20772e+09	1.82578e+09	1.79943e+09
A0A3B3IRK5	SLC25A32	34681000	7.7934e+07	5.88827e+07	6.20845e+07
A0A3B3IRL2	CREG1	251420000	1.38653e+08	1.44859e+08	2.818e+08
A0A3B3IRS7	LMBRD1	74757000	7.13285e+07	1.56066e+07	5.4828e+07
A0A3B3IRT8	SSR1	1478900000	1.53068e+09	1.5944e+09	1.42626e+09
A0A3B3IS40	KDM5B	23760000	3.88356e+07	5.24999e+07	4.28025e+07
A0A3B3ISG5	IDE	213710000	2.0913e+08	2.4038e+08	2.06983e+08
A0A3B3ISI6	LEPROT	51268000	3.9602e+07	2.27706e+07	1.76587e+07
A0A3B3ISL3	SLC18B1	15594000	1.95212e+07	2.47432e+07	1.02211e+07
A0A3B3ISQ4	EPS8L2	114180000	4.59502e+07	1.84925e+08	1.4739e+08
A0A3B3ISU2	ALG11	11002000	1.07964e+07	1.25601e+07	1.05239e+07
A0A3B3ISV4	VKORC1L1	119330000	1.5435e+08	7.6836e+07	9.68315e+07
A0A3B3ISZ4	PCGF6	8118300	1.50552e+07	8.57003e+06	7.59445e+06
A0A3B3IT54	C8orf33	116290000	1.46461e+08	8.28813e+07	6.80098e+07
A0A3B3ITR6	FARS2	26809000	1.78639e+07	3.48905e+07	4.03159e+07
A0A3B3ITT1	RAB12	68627000	8.83214e+07	9.78138e+07	5.85867e+07
A0A3B3ITT5	RPL29	2483900000	2.76954e+09	2.50991e+09	2.34919e+09
A0A3B3ITW3	ABCD3	2542000000	1.78612e+09	2.15968e+09	2.22277e+09
A0A3B3IU45	MCM4	6425700000	4.6971e+09	5.35885e+09	5.83971e+09
A0A3B3IU46	FAM103A1	91201000	1.02737e+08	6.11212e+07	2.71097e+07
A0A3B3IU55	STON2	355540000	8.22919e+07	1.05306e+08	1.52251e+08
A0A3B3IUB5	HM13	1574600000	1.67564e+09	1.29709e+09	1.01718e+09
A0A3B3IUB9	BIRC6	36463000	2.61221e+07	2.37436e+07	1.14342e+07
A0A3B3IUD2	MSTO1	30496000	3.09764e+07	1.04893e+07	1.12143e+07
A0A494BZW2	LRBA	108260000	8.30916e+07	1.86594e+08	4.31929e+07
A0A494BZZ6	NTHL1	52092000	3.40725e+07	2.41857e+07	3.55452e+07
A0A494C050	NKAP	41727000	8.64539e+07	4.2658e+07	5.0392e+07
A0A494C0G1	PGM3	114430000	6.43395e+07	1.41218e+08	1.32818e+08
A0A494C0G7	DIMT1	26178000	4.09424e+07	2.41416e+07	3.13396e+07
A0A494C0P0	MED27	28749000	2.65003e+07	3.99224e+07	3.65668e+07
A0A494C0Q8	UROD	109800000	1.35665e+08	1.5005e+08	9.53969e+07
A0A494C0R8	CLUH	585300000	6.60427e+08	6.22098e+08	6.89141e+08
A0A494C108	KRI1	395810000	4.41314e+08	4.81063e+08	3.11066e+08
A0A494C146	PPOX	222420000	2.62169e+08	2.05321e+08	1.33983e+08
A0A494C157	NFKB1	8608000	1.51949e+07	3.97427e+07	3.87882e+07
A0A494C1F2	NUP214	1514900000	1.53898e+09	1.29095e+09	1.31827e+09
A0A494C1J1	SPECC1L	93419000	8.01273e+07	4.60227e+07	2.51117e+07
A0A494C1M4	ALDH1L2	9098700	3.38288e+07	1.41759e+07	5.95379e+07
A0A494C1N0	FKBP2	1472600000	1.07621e+09	1.34881e+09	1.57467e+09
A0A494C1Q3	CCDC39	896540000	8.50503e+08	4.30276e+08	5.07798e+08
A0A494C1T8	MYC	99719000	1.12386e+08	6.74508e+07	6.48276e+07
A0A499FI31	SART3	663150000	7.02688e+08	8.31169e+08	6.72978e+08
A0A499FI48	NA	28648000	2.93517e+07	1.45821e+07	2.13e+07
A0A499FIZ0	WDR26	79730000	9.0244e+07	1.55222e+08	1.81212e+08
A0A499FJN5	FECH	209900000	1.53366e+08	9.20179e+07	1.19768e+08
A0A499FJS4	SMTNL1	6.08981e+06	7.4354e+06	1.30535e+07	1.09256e+07
A0A499FJY3	RBM15	892800000	7.67127e+08	7.85857e+08	8.56338e+08
A0A4W8VYG7	CGREF1	398820000	3.26617e+08	1.63365e+08	2.04088e+08
A0A590UJ21	CUL1	484240000	3.85405e+08	5.88992e+08	4.38894e+08
A0A590UJ73	TSEN34	26437000	2.52475e+07	3.63798e+07	1.50321e+07
A0A590UJK4	SRSF6	2520300000	2.96189e+09	3.48749e+09	3.35532e+09
A0A590UJS4	NIPBL	457160000	5.65308e+08	5.31666e+08	3.62181e+08
A0A590UJS8	ABCB7	500050000	4.32612e+08	4.91105e+08	5.85145e+08
A0A590UK95	ITCH	104030000	1.26702e+08	1.03986e+08	1.08978e+08
A0A5F9UK94	AMPD2	86990000	1.18813e+08	1.34936e+08	9.89269e+07
A0A5F9UP49	SDF4	1729000000	1.76708e+09	1.35413e+09	1.7976e+09
A0A5F9UY30	TGOLN2	16574000	4.24841e+07	2.75678e+07	4.20904e+07
A0A5F9YFS9	SPCS1	901180000	7.64943e+08	8.80902e+08	7.09477e+08
A0A5F9ZH66	NA	1.03667e+07	1.13919e+07	4.46187e+07	4.26921e+07
A0A5F9ZH93	POLG2	3464300	1.22415e+07	6.25674e+06	7.36796e+06
A0A5F9ZHB6	PRIM1	31752000	4.58644e+07	3.55866e+07	1.70944e+07
A0A5F9ZHH6	RXRA	48080000	3.70809e+07	1.71243e+07	1.73628e+07
A0A5F9ZHM4	LDHB	9486900000	9.43158e+09	1.18099e+10	1.17081e+10
A0A5F9ZHN7	SACM1L	1009300000	9.35937e+08	7.34557e+08	6.00447e+08
A0A5F9ZHN8	JAK1	62329000	6.2619e+07	1.78965e+07	5.11615e+07
A0A5F9ZHR7	ACP2	199540000	2.69606e+08	1.43584e+08	1.79856e+08
A0A5F9ZHS3	MEN1	94000000	5.59071e+07	8.60314e+07	5.277e+07
A0A5F9ZHY7	BRI3BP	260200000	1.43193e+08	1.2683e+08	2.00897e+08
A0A5F9ZHZ6	CASP7	28350000	2.41959e+07	4.5699e+07	3.43027e+07
A0A5F9ZI63	EED	251570000	2.85854e+08	2.34648e+08	3.13553e+08
A0A5H1ZRP4	NELFB	107120000	9.7836e+07	1.03325e+08	1.033e+08
A0A5H1ZRS1	PCM1	369380000	3.62469e+08	3.01924e+08	3.15448e+08
A0A5K1VW60	ATP5S	59474000	7.32096e+07	6.24308e+07	8.90933e+07
A0A669KAX3	WFS1	250910000	2.55291e+08	2.47212e+08	1.66258e+08
A0A669KAX4	CUL4B	190060000	1.96719e+08	3.66027e+08	1.99271e+08
A0A669KAX9	MRPL2	462710000	4.1882e+08	4.40345e+08	3.8537e+08
A0A669KB03	MLH1	107400000	9.0597e+06	9.59521e+06	1.11969e+07
A0A669KB10	GBF1	169670000	1.74253e+08	2.6283e+08	2.96633e+08
A0A669KB12	EP300	10512000	2.11396e+07	3.82332e+07	1.91898e+07
A0A669KB68	STAT1	257040000	2.4417e+08	3.90265e+08	2.73879e+08
A0A669KBH9	WIZ	226020000	8.64674e+07	1.96911e+08	2.07122e+07
A0A6E1WCP9	ESRRA	14431000	1.26774e+07	3.83057e+06	4.28069e+06
A0A6E1WJ75	LDB1	14454000	6.51347e+06	1.93427e+07	1.31453e+07
A0A6E1XE14	TFAP2A	71427000	1.06682e+08	1.48931e+08	1.24976e+08
A0A6I8PIV1	LARS	1965200000	1.61535e+09	2.24524e+09	2.46117e+09
A0A6I8PS19	GNL3L	51647000	6.09663e+07	6.22263e+07	3.43053e+07
A0AV96	RBM47	1060000000	5.88316e+08	5.95971e+08	6.46398e+08
A0AVT1	UBA6	147310000	1.58195e+08	1.97783e+08	6.8835e+07
A0MZ66-4	KIAA1598	63692000	8.77816e+07	2.04349e+08	1.65058e+08
A0PJW6	TMEM223	19916000	2.5168e+07	1.22054e+07	8.68359e+06
A1L0T0	ILVBL	2458500000	2.00122e+09	1.91418e+09	1.6431e+09
A1L390	PLEKHG3	64815000	8.01598e+07	5.13307e+07	2.22651e+07
A2A283	SYNGR1	59056000	6.4928e+07	8.49125e+07	8.03474e+07
A2A2F4	PMEPA1	1.42733e+07	1.41593e+07	1.35147e+07	1.43426e+07
A2A2Q9	AAR2	199660000	1.80418e+08	5.63085e+08	6.64187e+08
A2A2V2	RBM34	210310000	2.68767e+08	1.8521e+08	1.75126e+08
A2ACR1	PSMB9	23117000	3.18574e+07	3.53325e+07	4.33729e+07
A2IDA3	MPG	159880000	1.21674e+08	1.42713e+08	1.28941e+08
A2PYH4	HFM1	152310000	1.01964e+07	2.25524e+08	1.48408e+08
A2RRP1-2	NBAS	267250000	3.11479e+08	3.40367e+08	2.82965e+08
A3KMH1	VWA8	276550000	2.50516e+08	2.37996e+08	1.94967e+08
A4D1E9	GTPBP10	289030000	2.72007e+08	2.56933e+08	2.42813e+08
A5PLN9-2	TRAPPC13	9096200	1.74442e+07	2.50587e+07	1.43973e+07
A5YKK6	CNOT1	322080000	4.86454e+08	3.97399e+08	3.15857e+08
A6NDG6	PGP	118040000	1.10915e+08	1.12899e+08	9.24407e+07
A6NEM2	HCFC1	16237000	1.45242e+07	1.59138e+07	1.45912e+07
A6NFX8	NUDT5	396230000	4.17349e+08	6.69941e+08	5.59253e+08
A6NGJ0	DYNLT3	76209000	7.25353e+07	2.52137e+07	1.09847e+08
A6NGW1	YIF1A	243510000	3.4512e+08	2.80263e+08	9.3458e+07
A6NHB5	ZMYM3	335100000	3.62487e+08	2.11676e+08	2.44083e+08
A6NHL2-2	TUBAL3	209510000	2.40858e+08	2.27349e+08	2.05149e+08
A6NHQ2	FBLL1	447710000	4.71976e+08	3.9972e+08	3.64772e+08
A6NHR9	SMCHD1	1648500000	1.61878e+09	1.28453e+09	8.07865e+08
A6NHV6	PKMYT1	63095000	6.33123e+07	3.71208e+07	2.57768e+07
A6NJ78	METTL15	10952000	7.57884e+06	1.05581e+07	2.51821e+07
A6NJD9	MRPL23	447230000	4.40754e+08	3.49731e+08	3.99785e+08
A6NLH6	CNIH4	263630000	2.85953e+08	3.64569e+08	2.62611e+08
A6NMQ3	ENSA	118450000	1.22054e+08	1.30846e+08	8.09978e+07
A6NNI4	CD9	1358100000	1.03405e+09	1.28205e+09	1.58033e+09
A6PW57	PIP5K1A	132020000	7.05432e+07	1.64136e+08	1.71518e+08
A6ZKI3	FAM127A	14084000	1.29248e+07	2.08402e+07	1.76378e+07
A8MSZ8	OBSL1	2.00166e+07	3.68932e+07	3.12195e+07	1.2861e+07
A8MX75	ERCC2	137320000	1.66905e+08	1.24143e+08	9.81009e+07
A8MXP9	MATR3	18347000000	2.23202e+10	2.12593e+10	2.27702e+10
A8MXV4	NUDT19	15916000	1.7975e+07	2.09677e+07	1.3327e+07
A8MXZ4	GPRC5C	41585000	1.42679e+07	2.28073e+07	2.91007e+07
A8MZH8	PTTG1IP	303950000	3.55979e+08	2.82923e+08	3.35045e+08
A9Z1X7	SRRM1	1771600000	1.91015e+09	1.78469e+09	1.61389e+09
B0QYD3	APOBEC3B	31029000	1.06953e+08	1.52361e+08	1.53929e+08
B0QYK0	EWSR1	1493500000	1.90103e+09	1.71078e+09	1.99984e+09
B0QYW5	SLC25A17	71109000	5.89851e+07	2.49863e+07	3.0265e+07
B1AH87	TSPO	1643600000	1.61417e+09	2.0235e+09	1.90142e+09
B1AJY5	PSMD10	235860000	2.36895e+08	2.3618e+08	1.73422e+08
B1AKD8	CROCC	312330000	3.93086e+08	4.61007e+08	3.30907e+08
B1AL05	MRPL43	1.13926e+07	6.17525e+06	1.58578e+07	1.5512e+07
B1ALA9	PRPS1	480030000	4.81454e+08	4.66014e+08	4.07523e+08
B1ALM3	CACNA1S	1.38081e+07	6.61976e+06	2.50743e+07	1.11586e+07
B1ALM5	TMEM9	137870000	2.35938e+08	2.6979e+08	2.74514e+08
B1AMJ5	CDK5RAP2	1.32421e+07	1.04624e+07	1.00262e+08	1.02089e+07
B1AMS2	SEPT6	176370000	2.06901e+08	2.6869e+08	2.27033e+08
B1AMW1	CD58	98760000	2.00934e+08	4.81631e+07	1.19724e+08
B1ANH5	GUK1	7566000	1.19255e+07	1.33131e+07	1.19524e+07
B1APK7	DESI2	9758400	1.12937e+07	1.22919e+07	8.35283e+06
B1APY4	ROR2	67351000	7.16426e+07	3.54508e+07	4.52805e+07
B1AVT0	CLK2	9.32165e+06	9.66289e+06	7.57236e+06	1.4846e+07
B2WTI3	JMJD6	99843000	7.37196e+07	3.71034e+07	5.92118e+07
B3KPJ4	PHC2	34924000	5.69072e+07	5.52979e+07	7.45316e+07
B3KS98	EIF3H	1539000000	1.29798e+09	1.5601e+09	1.85716e+09
B3KTM8	MORF4L1	128550000	9.77999e+07	2.84748e+08	1.66066e+08
B3KVL5	ZCCHC10	14562000	1.23191e+07	1.20291e+07	1.49816e+07
B3KVN2	FNTA	23140000	1.05544e+07	1.79166e+07	1.03422e+07
B3KVZ3	CENPH	1.09674e+07	1.54548e+07	7.74605e+06	1.32401e+07
B3KY94	CDIPT	128900000	1.37904e+08	1.13826e+08	1.30575e+08
B4DDF4	CNN2	508580000	3.15243e+08	4.79559e+08	4.84636e+08
B4DEE8	MGMT	1.24369e+07	7.84259e+06	1.62329e+07	1.31752e+07
B4DHE8	MSI2	329320000	5.61318e+08	5.71733e+08	6.66917e+08
B4DKB2	ECE1	140150000	7.84277e+07	8.17248e+07	4.54352e+07
B4DKD5	MTERF4	46665000	3.11949e+07	1.29058e+07	1.31827e+07
B4DKY1	CARS	15682000	1.63322e+07	3.9219e+07	5.19901e+07
B4DLN1	NA	4396600000	8.65441e+09	4.32624e+09	3.94621e+09
B4DN67	KIRREL	20458000	1.88767e+07	1.45934e+07	9.79618e+06
B4DP61	SMN2	47221000	5.96557e+07	2.59969e+07	2.02662e+07
B4DR61	SEC61A1	1686800000	1.54539e+09	2.09998e+09	1.66779e+09
B4DVT3	VWA9	52476000	5.49611e+07	7.2126e+07	5.64721e+07
B4DXZ6	FXR1	1687900000	1.829e+09	1.43071e+09	1.80326e+09
B4DY08	HNRNPC	27792000000	3.11173e+10	2.41747e+10	2.66993e+10
B4DYP1	DDAH1	71790000	4.04369e+07	9.04654e+07	8.47721e+07
B4E1G1	DERL1	188570000	2.50245e+08	3.85019e+08	2.98963e+08
B4E3T4	RBPMS	24492000	3.3289e+07	2.82941e+07	3.62407e+07
B5MBW9	CHCHD10	93953000	1.26161e+08	6.71555e+07	9.81705e+07
B5MBX0	CDCA5	58354000	5.86899e+07	6.31654e+07	4.232e+07
B5MBZ8	PPP1R7	30024000	3.63904e+07	1.799e+07	7.46403e+07
B5MC22	MTFP1	91892000	7.96878e+07	5.28108e+07	1.1829e+08
B5MCF9	PES1	1915700000	1.78919e+09	1.55139e+09	1.5059e+09
B5MCR8	SLC30A6	21702000	1.96728e+07	1.2494e+07	1.36915e+07
B5MCW3	BRD8	1.19882e+07	2.70681e+07	7.76311e+06	9.69358e+06
B5MDF5	RAN	8571500000	7.81443e+09	1.05618e+10	9.15713e+09
B6VEX4	ABI1	70536000	9.14003e+07	8.55655e+07	6.74447e+07
B7WPG3	HNRNPLL	458770000	3.44281e+08	6.07067e+08	5.84293e+08
B7Z2J6	ZMYND11	6.43452e+06	2.04473e+07	4.32871e+07	4.7901e+07
B7Z2R7	ACBD5	524870000	5.75815e+08	3.62569e+08	3.82379e+08
B7Z4K4	FTSJ1	13457000	1.70001e+07	1.3356e+07	1.64936e+07
B7Z524	HBS1L	217410000	2.16956e+08	2.41297e+08	2.74105e+08
B7Z5N5	SMAD2	95418000	8.8696e+07	9.87033e+07	1.02518e+08
B7Z6D5	DDX27	1267900000	1.13984e+09	1.16934e+09	1.35262e+09
B7Z7F3	RANBP3	86460000	1.2617e+08	1.38137e+08	9.69097e+07
B7Z7P8	ETF1	823950000	8.30401e+08	1.20887e+09	1.19968e+09
B7Z8V7	NADK2	26235000	3.16742e+07	2.06862e+07	2.51256e+07
B7Z934	EBF2	154820000	237175000	1.30599e+08	1.43321e+08
B7ZAQ6-2	GPR89A	85444000	9.22036e+07	6.74609e+07	6.82785e+07
B7ZC39	SH3GLB2	15430000	1.7456e+07	3.01429e+07	3.89065e+07
B7ZKQ9	SCARB1	443190000	4.74025e+08	3.31435e+08	3.36332e+08
B7ZLQ5	SMARCA1	156850000	6.98121e+07	9.38521e+07	5.6473e+07
B8ZWD1	DBI	1244400000	9.32326e+08	1.18833e+09	1.12525e+09
B8ZZ77	PPIL3	106390000	5.27551e+07	1.03188e+08	1.26758e+08
B8ZZ87	MZT2B	9126800	1.08947e+07	2.91378e+07	2.4017e+07
B8ZZF8	LSM5	357600000	1.893e+08	2.2203e+08	1.89568e+08
B8ZZK5	PDE6D	13346000	1.57283e+07	1.63925e+07	1.28149e+07
B8ZZL5	MITD1	5584700	9.40901e+06	1.08887e+07	1.19137e+07
B8ZZN6	SUMO1	483910000	4.65342e+08	2.75733e+08	2.9292e+08
B8ZZQ6	PTMA	4508800000	4.57191e+09	5.65882e+09	4.94078e+09
B8ZZX6	STEAP3	39225000	1.32641e+07	1.73141e+07	8.51773e+06
B9A057	COA5	15334000	2.18301e+07	1.68299e+07	8.82268e+06
C9IYL4	GTF2E1	27011000	2.81043e+07	2.17371e+07	8.48834e+06
C9IYS7	CPSF3L	27762000	4.74937e+07	2.94799e+08	3.65859e+08
C9J0I9	ZC3HC1	48487000	4.419e+07	5.90166e+07	4.83766e+07
C9J0J7	PFN2	253220000	2.38854e+08	2.12456e+08	2.08444e+08
C9J0K6	SRI	1214200000	1.14138e+09	1.015e+09	9.34841e+08
C9J2P0	UBE2E1	39963000	1.14869e+07	6.45951e+07	1.36053e+07
C9J2Y9	POLR2B	1400000000	1.16232e+09	1.34139e+09	1.22915e+09
C9J384	CMSS1	39153000	4.17159e+07	2.38839e+07	4.29251e+07
C9J3D7	CROT	70542000	2.91595e+07	6.23134e+07	2.41083e+07
C9J494	MKRN2	30306000	4.76507e+07	6.41182e+07	4.42884e+07
C9J4K0	C2orf49	30139000	1.22243e+07	2.48909e+07	3.50261e+07
C9J4Z3	RPL37A	4143900000	5.54594e+09	4.10229e+09	4.2486e+09
C9J5J4	LIN9	1.08838e+07	7.36663e+06	2.90956e+07	9.93964e+06
C9J5N1	PTGES3L-AARSD1	40381000	5.30178e+07	4.74442e+07	1.35618e+07
C9J5X1	IGF1R	355910000	4.95806e+08	2.38601e+08	2.51708e+08
C9J647	SMPD4	113070000	1.84109e+08	2.49927e+08	1.20768e+08
C9J6N5	FAM107B	123830000	1.20203e+08	1.3246e+08	1.36827e+08
C9J7E5	TNPO3	673490000	6.64669e+08	8.22641e+08	7.14459e+08
C9J7K9	PLSCR1	123700000	1.18443e+08	7.82593e+07	1.30566e+08
C9J7M8	TAF8	17465000	1.49981e+07	1.51971e+07	2.43153e+07
C9J974	TTC14	5670700	7.98764e+06	9.34811e+06	6.65304e+06
C9J975	AGAP3	1.03964e+07	2.42455e+07	1.26674e+07	1.28041e+07
C9J9K3	RPSA	18498000000	1.82421e+10	1.77782e+10	2.14556e+10
C9JA08	NMD3	62024000	6.99773e+07	2.09503e+08	1.00196e+08
C9JA28	SSR3	268880000	3.4392e+08	3.13085e+08	2.60133e+08
C9JA69	BBX	82693000	4.30293e+07	3.5958e+07	1.26723e+07
C9JAG1	EPT1	449620000	3.89539e+08	1.76057e+08	2.66176e+08
C9JAX1	FXN	58167000	8.51604e+07	1.84715e+07	3.35698e+07
C9JBY7	MRPS33	124630000	5.82629e+07	6.85944e+07	5.41863e+07
C9JCC6	DRAP1	132840000	1.28173e+08	1.49206e+08	1.32731e+08
C9JCN8	FOSL2	94995000	1.21413e+08	9.37512e+07	4.2853e+07
C9JE98	NCOR2	48182000	4.86563e+07	3.66907e+07	2.62559e+07
C9JEN3	TMBIM1	10922000	2.19357e+07	8.86696e+06	1.38052e+07
C9JFR7	CYCS	5549200000	4.00226e+09	2.79053e+09	3.12387e+09
C9JG41	ITM2C	19324000	1.52896e+07	3.31463e+07	3.56365e+07
C9JGI3	TYMP	93611000	8.51424e+07	1.13486e+08	1.057e+08
C9JIF9	APEH	119840000	8.43083e+07	1.78368e+08	1.41661e+08
C9JJ19	MRPS34	627860000	5.45288e+08	6.28967e+08	6.23184e+08
C9JJU7	FAM207A	61204000	6.83896e+07	5.24541e+07	4.90226e+07
C9JLU1	POLR2H	837200000	7.22257e+08	7.07999e+08	6.67578e+08
C9JME2	FARP1	26489000	4.93937e+07	1.12368e+08	8.98324e+07
C9JNK6	MTX2	1509800000	1.40882e+09	1.08195e+09	1.10873e+09
C9JQV0	C7orf50	415950000	4.98793e+08	3.22796e+08	3.76301e+08
C9JRJ5	LIMD1	10664000	1.17423e+07	1.15435e+07	1.67814e+07
C9JRY4	SEC22A	23970000	2.1266e+07	1.38907e+07	1.14038e+07
C9JRZ6	CHCHD3	2481800000	3.09701e+09	1.86521e+09	1.785e+09
C9JT95	NABP2	51093000	7.83961e+07	5.7674e+07	4.43589e+07
C9JTE9	BCAP29	137970000	2.04446e+08	2.39316e+08	5.70755e+07
C9JTS3	AAMP	1.28615e+07	1.27596e+07	8.55857e+06	1.72179e+07
C9JUM0	LDAH	60527000	5.94111e+07	6.33231e+07	9.46752e+07
C9JVB0	IMMP2L	23024000	2.45976e+07	2.87985e+07	3.93273e+07
C9JWU9	MEST	30259000	4.9039e+07	3.58131e+07	6.67457e+07
C9JXB8	RPL24	3878600000	4.4033e+09	4.06249e+09	4.38276e+09
C9JY00	ALDH1L1	5.99044e+06	1.12278e+07	1.95646e+07	1.82134e+07
C9JYA1	NUPL2	10034000	4.62706e+07	3.42898e+07	2.35693e+07
C9JYM0	POP7	7.33069e+06	5.16041e+06	8.33636e+07	8.60094e+07
C9JZE3	REPIN1	36965000	2.85231e+07	5.42634e+07	3.3688e+07
C9K025	RPL35A	2941300000	4.02428e+09	2.98485e+09	2.16851e+09
D3YTB1	RPL32	8874600000	9.59766e+09	8.11177e+09	7.95049e+09
D6R938	CAMK2D	842050000	7.137e+08	5.60581e+08	4.62099e+08
D6R9P3	HNRNPAB	10122000000	1.10473e+10	1.12138e+10	1.21707e+10
D6R9X7	ERCC6	8227500	3.35805e+07	1.80093e+07	3.55895e+07
D6RA24	PLAC8	355140000	4.74368e+08	2.42746e+08	5.21405e+08
D6RA57	TMA16	43174000	5.85662e+07	6.83816e+07	6.90906e+07
D6RA77	PAIP2	17329000	1.44096e+07	5.39122e+07	5.98543e+07
D6RAD4	CDK7	30228000	9.06511e+07	5.91422e+07	5.75311e+07
D6RAL1	GFM2	52397000	6.15774e+07	4.74698e+07	5.26544e+07
D6RAV6	C5orf28	11392000	1.79416e+07	1.27057e+07	1.30817e+07
D6RAY7	GNPDA1	321090000	1.62428e+08	1.9549e+08	2.55768e+08
D6RB81	AMACR	142100000	1.69532e+08	6.4021e+07	1.00188e+08
D6RB92	PSMG4	12639000	3.8193e+07	6.90538e+07	6.84054e+07
D6RBR6	EPN3	2.05968e+07	9.76587e+06	7.31742e+06	2.12765e+07
D6RBS5	ELMOD2	325430000	3.02092e+08	2.4237e+08	9.92312e+07
D6RD90	UBE2J2	28750000	3.49408e+07	1.80634e+07	1.55059e+07
D6RDU9	GATB	53780000	2.89916e+07	6.39192e+07	6.27244e+07
D6REA1	SIL1	415470000	5.26414e+08	5.53933e+08	5.19484e+08
D6REB0	CALCOCO2	74556000	6.9757e+06	1.92867e+07	1.78021e+07
D6RER8	SLC38A9	16359000	2.46463e+07	1.70252e+07	1.33713e+07
D6RFF6	ACAD10	8755000	6.72947e+06	2.09035e+07	3.63242e+07
D6RGG3	COL12A1	376530000	3.87084e+08	1.45152e+08	1.48756e+08
D6RGI3	SEPT11	483100000	5.6585e+08	7.79108e+08	6.86741e+08
D6RGY8	YIPF3	182990000	2.19438e+08	1.87557e+08	1.61145e+08
D6RIE3	COX7A2	1123000000	1.3312e+09	1.40439e+09	1.29862e+09
D6RIZ4	MFSD10	165800000	7.66495e+07	1.07039e+08	6.57832e+07
D6RJ07	ZNF346	64042000	1.0633e+08	1.05636e+08	7.83303e+07
D9J307	HLA-B	3432500000	4.37532e+09	3.25676e+09	3.5313e+09
E2QRD4	MMS22L	29664000	1.1254e+07	2.8837e+07	3.57017e+07
E3W994	CLASP2	45039000	1.11439e+07	9.24673e+07	9.71328e+06
E5RFF9	GINS4	50587000	6.70954e+06	1.92601e+07	6.53806e+07
E5RFJ9	SARAF	23350000	2.34187e+07	7.60565e+06	7.03585e+06
E5RFP0	NUDCD2	56593000	5.16963e+07	2.9534e+07	2.27615e+07
E5RGS2	REEP4	150390000	1.58267e+08	1.57634e+08	1.37992e+08
E5RGS4	PFDN1	107970000	4.36737e+07	4.28323e+07	1.16194e+08
E5RGX5	STMN2	139500000	1.10563e+08	2.13428e+08	1.96324e+08
E5RH53	RMDN1	270120000	2.80357e+08	2.32548e+08	2.461e+08
E5RHG8	TCEB1	877760000	9.21043e+08	1.05609e+09	8.60998e+08
E5RHW4	ERLIN2	1818800000	1.60262e+09	1.43153e+09	1.4393e+09
E5RIA4	DNPEP	76713000	4.58978e+07	3.64018e+07	5.27474e+07
E5RIJ0	POLB	1.10237e+07	1.84507e+07	1.12872e+07	1.9062e+07
E5RIK5	DCTN6	77820000	8.34517e+06	7.95404e+07	9.30407e+07
E5RIM1	NSMCE2	39940000	8.41865e+06	1.99993e+07	7.31831e+06
E5RIQ5	TM2D2	12795000	1.75507e+07	9.66289e+06	1.10217e+07
E5RIW3	TBCA	304830000	1.64017e+08	3.23154e+08	4.64386e+08
E5RJN7	STAU2	158780000	1.86926e+08	1.37917e+08	1.56363e+08
E5RJR5	SKP1	1438700000	1.57166e+09	2.25817e+09	1.87768e+09
E5RK69	ANXA6	142010000	1.73522e+08	1.28554e+08	1.63919e+08
E7EM50	PIGG	31416000	7.61962e+06	1.08874e+07	1.00135e+07
E7EMP6	HMCES	15313000	2.67115e+07	8.26291e+06	1.49113e+07
E7EN19	MAP4K4	12353000	3.83563e+07	3.67457e+07	1.36079e+07
E7ENR5	IMP4	184610000	1.29211e+08	2.75238e+08	2.47604e+08
E7EPB3	RPL14	2901100000	2.87343e+09	4.0955e+09	4.09349e+09
E7EPI0	IBTK	13659000	7.83302e+06	8.73226e+06	9.84673e+06
E7EPM6	ACSL1	539580000	4.13558e+08	4.8121e+08	4.57178e+08
E7EPN9	PRRC2C	1013900000	1.43825e+09	8.97931e+08	6.28044e+08
E7EPT4	NDUFV2	674860000	7.60782e+08	6.40898e+08	7.14685e+08
E7EPV7	SNCA	143930000	1.5546e+08	1.25793e+08	7.05547e+07
E7EQ61	UBA5	23364000	2.83931e+07	1.82138e+07	1.99454e+07
E7EQ69	NAA50	511250000	4.99335e+08	7.44672e+08	7.12512e+08
E7EQL1	FDX1L	54464000	3.88573e+07	9.16261e+06	1.62822e+07
E7EQR4	EZR	4505100000	3.19414e+09	5.11106e+09	4.81984e+09
E7EQY1	FAM136A	340480000	5.02196e+08	3.75784e+08	3.44801e+08
E7EQY4	MTA3	127320000	1.11123e+08	7.46048e+07	1.09526e+08
E7ERK9	EIF2B4	175660000	1.55478e+08	1.4242e+08	8.0803e+07
E7ERS3	ZC3H18	414820000	4.40718e+08	3.62955e+08	3.03484e+08
E7ERX9	KIF13B	7695600	1.56814e+07	1.16256e+07	7.12533e+06
E7ESL0	MRPL22	384190000	2.9822e+08	4.53478e+08	3.6172e+08
E7ESP4	ITGA2	56621000	4.99317e+07	1.03252e+07	1.30912e+07
E7ESU0	USP19	87426000	6.10033e+07	3.72749e+07	2.06192e+07
E7ET49	DAGLB	202200000	2.74779e+08	1.92996e+08	2.30154e+08
E7ETK0	RPS24	3663500000	3.52188e+09	3.98096e+09	4.32407e+09
E7ETU5	RBMS1	24920000	2.57574e+08	1.62733e+07	2.55273e+07
E7ETY2	TCOF1	69047000	6.43774e+07	4.77257e+07	5.49975e+07
E7ETZ4	BZW2	314080000	2.64768e+08	3.63193e+08	3.7158e+08
E7EVA0	MAP4	1277100000	1.08415e+09	1.36917e+09	2.0567e+09
E7EVJ5	CYFIP2	8629600	1.10328e+07	1.88464e+07	1.52325e+07
E7EVK2	MTG1	7420300	8.87908e+06	9.95347e+06	3.86039e+07
E7EW69	SEPT10	117600000	8.85507e+07	1.21786e+08	1.54155e+08
E7EWP0	NDUFB5	397120000	4.86355e+08	3.15231e+08	2.16956e+08
E7EX17	EIF4B	1197300000	1.2107e+09	1.22694e+09	1.15281e+09
E7EX90	DCTN1	841780000	9.08407e+08	9.38246e+08	4.50283e+08
E9PB90	HK2	706020000	5.81212e+08	4.60447e+08	4.38667e+08
E9PCB6	NLN	87750000	6.72558e+07	6.30379e+07	8.47269e+07
E9PCW1	GOSR1	151140000	1.72556e+08	1.44547e+08	1.87255e+08
E9PCX8	TNS3	11465000	3.56755e+07	4.98175e+07	3.01571e+07
E9PD09	GRAMD3	67525000	7.28115e+07	8.26639e+07	6.47711e+07
E9PDF6	MYO1B	411630000	3.55104e+08	3.27418e+08	3.40819e+08
E9PDR0	PCCB	121210000	1.11285e+08	1.23336e+08	1.56215e+08
E9PEI0	CDCA2	72395000	7.69402e+07	6.79928e+07	4.96669e+07
E9PEJ6	ATP11A	123440000	1.15609e+08	8.96492e+07	7.82051e+07
E9PEY4	DTNB	26765000	4.99254e+07	1.00155e+07	1.36228e+07
E9PF16	ACSF2	251720000	2.89419e+08	3.28684e+08	3.43236e+08
E9PF18	HADH	5466700000	4.34815e+09	4.22188e+09	5.03399e+09
E9PF19	TBL2	965870000	1.00228e+09	9.28616e+08	8.41287e+08
E9PFF8	C3orf17	10240000	9.32868e+06	1.26266e+07	1.2494e+07
E9PFR3	PPP2R5D	146520000	8.46928e+07	1.05948e+08	5.68147e+07
E9PG40	APP	202960000	1.8818e+08	1.69611e+08	2.11548e+08
E9PGE5	TBC1D23	8.44926e+06	1.16791e+07	2.1694e+07	3.16413e+07
E9PGM1	EIF4G1	5306100000	5.67646e+09	6.88401e+09	6.80611e+09
E9PGM9	RBM6	23083000	6.92272e+06	1.8377e+07	4.69951e+07
E9PGT1	TSN	347680000	3.43965e+08	4.58448e+08	4.95852e+08
E9PGT6	COPS8	320190000	3.65403e+08	3.32251e+08	3.84961e+08
E9PGW7	MED22	50350000	6.32446e+07	4.7999e+07	1.41183e+07
E9PGZ1	CALD1	227500000	1.6732e+08	2.96798e+08	2.89242e+08
E9PH99	ZNF451	8747500	9.1978e+06	8.27438e+06	1.99721e+07
E9PHA2	NCAPH	103540000	1.65524e+08	2.134e+08	1.39626e+08
E9PHG5	CYP20A1	37270000	2.91297e+07	3.78746e+07	1.93011e+07
E9PHH9	POLR3C	15041000	7.29289e+06	1.22548e+07	7.84102e+06
E9PHT6	PANK4	9.87819e+06	9.16143e+06	1.27114e+07	1.11021e+07
E9PHV5	SSFA2	141160000	1.76238e+08	1.35679e+08	1.19585e+08
E9PHY5	EPB41L2	44991000	1.4943e+08	9.22931e+07	1.09308e+08
E9PIF7	CHORDC1	400890000	5.29456e+08	5.99951e+08	7.0067e+08
E9PIG5	RHOD	20570000	1.73955e+07	1.06222e+07	1.03766e+07
E9PJ42	TMEM41B	170680000	2.05547e+08	1.39696e+08	1.27836e+08
E9PJ81	UBXN1	106240000	9.33139e+07	3.39404e+08	2.58246e+08
E9PJ95	COMMD9	27964000	1.08964e+07	5.00202e+07	3.65181e+07
E9PJF0	MAPK3	20207000	7.59292e+06	3.22384e+07	4.25773e+07
E9PJK1	CD81	442880000	5.00653e+08	5.83086e+08	7.56063e+08
E9PK54	HSPA8	109320000	1.25772e+08	1.20043e+08	1.1642e+08
E9PK91	BCLAF1	127550000	1.00797e+08	1.06113e+08	8.96932e+07
E9PKP7	UBTF	1120500000	8.78259e+08	8.74592e+08	1.01327e+09
E9PKT6	CTSH	18604000	2.21505e+07	1.36202e+07	9.35884e+06
E9PL01	SPCS2	1648200000	1.7446e+09	1.51829e+09	1.16742e+09
E9PL17	CLP1	1.05407e+07	2.38222e+07	8.94227e+07	3.68946e+07
E9PLD2	MTFR1L	37236000	1.91403e+07	3.16148e+07	3.13013e+07
E9PLK3	NPEPPS	1827700000	1.74226e+09	2.03597e+09	1.91846e+09
E9PM62	WLS	182600000	2.43746e+08	1.58312e+08	1.0057e+08
E9PM92	C11orf58	396140000	3.69916e+08	3.68274e+08	3.38358e+08
E9PMA1	SYVN1	24687000	1.83505e+07	8.46398e+06	1.70049e+07
E9PMS6	LMO7	1999100000	2.25694e+09	1.91161e+09	2.00662e+09
E9PN17	ATP5L	2311300000	2.3565e+09	1.47647e+09	1.97741e+09
E9PN41	TSPAN4	60563000	5.55126e+07	3.50281e+07	3.28568e+07
E9PN81	RNASEH2C	9309700	1.73675e+07	3.65504e+07	3.70685e+07
E9PND3	EBAG9	30166000	1.52454e+07	9.74051e+06	1.22001e+07
E9PNK6	TPD52L1	35377000	1.2459e+07	1.67043e+07	1.74796e+07
E9PNW4	CD59	2427700000	2.4927e+09	1.53956e+09	1.93506e+09
E9PP55	RNF170	25521000	2.34287e+07	1.4652e+07	2.79565e+07
E9PPE6	C11orf30	5644000	7.94558e+06	1.24073e+07	1.17577e+07
E9PPZ9	GPAA1	165610000	2.00402e+08	1.20575e+08	9.94312e+07
E9PQA7	BSDC1	9726700	2.4241e+07	1.28122e+07	1.54953e+07
E9PQY2	PFDN4	70707000	7.98087e+07	1.10744e+08	1.21211e+08
E9PR30	FAU	1133600000	1.49331e+09	1.58303e+09	1.96341e+09
E9PRG8	C11orf98	129420000	1.79777e+08	1.22804e+08	1.24958e+08
E9PRR7	FRG1	76984000	6.61221e+07	9.97304e+07	8.44339e+07
E9PS17	SCYL1	142400000	1.64929e+08	1.64035e+08	2.50717e+08
E9PS74	SLC43A3	46524000	7.21174e+07	6.00134e+07	5.83989e+07
E9PSI1	TM9SF1	186500000	2.19285e+08	2.3519e+08	2.17295e+08
F2Z2U4	TRRAP	268920000	2.6086e+08	1.48573e+08	1.5252e+08
F2Z2W7	TRMT2A	10365000	2.41472e+07	3.98179e+07	1.11395e+07
F2Z2X4	XPO4	87267000	1.31342e+08	5.77776e+07	9.36928e+07
F2Z3H6	BCL7B	47516000	1.67302e+08	4.68985e+07	6.31365e+07
F2Z3J9	PTGR1	119440000	1.24265e+08	1.89465e+08	1.88916e+08
F5GWE5	PITPNA	32659000	1.65398e+07	5.43671e+07	5.0279e+07
F5GWH5	TMEM258	172740000	2.26009e+08	1.97187e+08	1.63136e+08
F5GWN5	PIK3C2B	14331000	1.17495e+07	9.96846e+06	3.38028e+07
F5GWT4	WNK1	78854000	4.58789e+07	1.02793e+08	5.10902e+07
F5GX77	TRMT112	549470000	6.70807e+08	4.91664e+08	5.60409e+08
F5GXE1	TM7SF3	1.44364e+07	1.2199e+07	1.05572e+07	6.65219e+06
F5GXF5	BPTF	21944000	1.73206e+07	1.67235e+07	2.09096e+07
F5GXQ0	BROX	53689000	6.16018e+07	7.71524e+07	4.74724e+07
F5GXX5	DAD1	1165000000	1.40639e+09	1.2362e+09	8.50364e+08
F5GYF7	COPS7A	67494000	2.54099e+07	8.70209e+07	6.04803e+07
F5GYJ5	SDHAF2	857830000	4.65378e+08	3.97335e+08	5.34177e+08
F5GYQ1	ATP6V0D1	912380000	8.19525e+08	7.64728e+08	9.43709e+08
F5GYV5	ARL6IP4	87523000	8.75786e+07	9.44206e+07	5.967e+07
F5GZ49	GLTP	17077000	7.35634e+06	2.40389e+07	1.75083e+07
F5GZ78	PXN	75995000	8.11762e+07	3.31674e+07	2.33128e+07
F5GZS6	SLC3A2	29615000000	3.12689e+10	2.37262e+10	2.79661e+10
F5H008	VPS33B	115910000	6.30018e+07	7.14703e+07	3.26003e+07
F5H0F9	ANAPC5	61100000	4.56947e+07	6.72894e+07	6.91758e+07
F5H0P4	HMBS	8.50458e+06	1.74208e+07	6.5093e+06	1.82569e+07
F5H0R1	TUT1	16742000	9.59676e+06	1.21722e+07	9.74185e+06
F5H1D6	POLE	13120000	1.06068e+07	7.46992e+06	1.073e+07
F5H1S9	PUS1	214930000	1.89038e+08	9.23664e+07	1.42504e+08
F5H1U9	MPDZ	28048000	3.35778e+07	3.13066e+07	4.56709e+07
F5H2B9	UACA	11121000	1.36333e+09	5.88588e+07	7.379e+07
F5H2U8	HMGA2	12794000	1.65894e+07	1.21033e+07	1.22201e+07
F5H324	ARSE	124840000	1.38481e+08	1.41796e+08	7.29631e+07
F5H365	SEC23A	3192000000	2.95927e+09	2.75944e+09	3.3535e+09
F5H442	TSG101	58238000	2.48341e+07	7.98201e+07	6.19723e+07
F5H4V9	PDCD2	12194000	1.80607e+07	5.33803e+06	5.96265e+06
F5H5A1	ACSF3	183060000	2.26714e+08	7.0257e+07	4.24295e+07
F5H5I6	GRSF1	5590600000	3.28512e+09	3.36314e+09	4.30321e+09
F5H5N1	NDUFS7	355760000	3.63877e+08	3.07005e+08	3.26273e+08
F5H5P2	BCKDHA	361600000	4.02356e+08	4.39419e+08	4.32442e+08
F5H5U2	DDX55	57295000	2.09898e+07	6.20896e+07	8.54033e+07
F5H610	PRKAB1	25262000	6.79346e+06	3.10682e+07	2.07679e+07
F5H631	CLEC2B	11917000	1.27262e+07	1.21042e+07	1.32519e+07
F5H6B2	TMEM2	11914000	6.5035e+06	1.49774e+07	9.08148e+06
F5H6E2	MYO1C	3012500000	3.70999e+09	9.57137e+08	9.86052e+08
F5H6I7	ATL3	56198000	5.99527e+07	2.95523e+07	3.68267e+07
F5H6X0	GTF2H3	75128000	8.31241e+07	4.27351e+07	2.7174e+07
F5H6Y0	VPS33A	16408000	7.21996e+06	6.65319e+06	1.03639e+07
F5H702	MRPL48	320410000	3.36139e+08	2.3927e+08	2.76261e+08
F5H7N8	OLR1	205250000	8.07475e+07	7.07183e+07	9.29624e+07
F5H7S3	TPM1	99518000	1.31351e+08	2.27055e+08	2.16991e+08
F5H7W8	C12orf43	35970000	7.33468e+07	1.75296e+07	6.18019e+07
F5H872	MED21	7.71458e+06	1.16146e+07	1.80212e+07	1.88759e+07
F5H8D7	XRCC1	15355000	2.02631e+07	1.01565e+07	1.44121e+07
F5H8F7	ASH2L	259850000	1.99292e+08	1.66236e+08	2.30606e+08
F6PQP6	EPN2	32936000	3.11227e+07	1.41429e+07	1.33131e+07
F6QDS0	DDX19A	1.31493e+07	1.09797e+07	1.04481e+07	1.4e+07
F6QUN3	ERI3	17029000	1.19328e+07	1.95334e+07	2.33328e+07
F6RP06	BNIP3	18742000	3.59689e+07	1.80377e+07	2.25016e+07
F6RY50	SIPA1	1.57606e+07	8.90192e+06	1.19704e+07	1.2961e+07
F6SA91	TRAF4	11209000	2.36408e+07	2.52777e+07	3.71024e+07
F6TLX2	GLOD4	179490000	1.51588e+08	1.39944e+08	1.23837e+08
F6U1T9	PPP3R1	50675000	2.90466e+07	4.94901e+07	1.05404e+08
F6XEV2	MICU1	350370000	3.62713e+08	2.98302e+08	3.51252e+08
F8U8C0	TNFRSF10A	14988000	2.0283e+07	6.12239e+06	1.4779e+07
F8VNX8	TRAFD1	61172000	6.39567e+07	4.86006e+07	2.53916e+07
F8VP71	LETMD1	37452000	3.98953e+07	2.57823e+07	2.26181e+07
F8VQR7	CSRP2	36256000	4.64818e+07	7.17564e+07	5.46385e+07
F8VSC5	SCYL2	28548000	3.93213e+07	1.10744e+07	1.10722e+07
F8VV56	CD63	1190900000	1.43699e+09	1.11203e+09	1.05378e+09
F8VV69	MFSD5	8528400	7.25019e+06	1.12613e+07	1.14602e+07
F8VVA7	COPZ1	820420000	6.76918e+08	2.87086e+08	5.5114e+08
F8VWW8	SMPDL3B	65584000	7.89602e+07	6.78772e+07	9.53621e+07
F8VXG7	SCAF11	531550000	5.62916e+08	4.81081e+08	3.29829e+08
F8VYE8	PPP1CC	360770000	4.38299e+08	5.78097e+08	8.20038e+08
F8VYN9	ARL1	179630000	1.51317e+08	1.78781e+08	2.02375e+08
F8VYY9	PRKAG1	32350000	3.5263e+07	2.41462e+07	3.17169e+07
F8VZJ2	NACA	3336300000	3.59238e+09	3.6478e+09	3.72997e+09
F8VZX2	PCBP2	64649000	6.59741e+07	2.16399e+07	1.33966e+07
F8VZZ0	CDK4	30149000	3.12797e+07	3.83992e+07	3.72119e+07
F8W0P7	ATP5B	86781000	9.31965e+07	2.59739e+07	1.96263e+07
F8W0Q9	PPHLN1	215150000	3.14404e+08	2.65645e+08	2.36397e+08
F8W120	TMEM106C	1.29442e+07	5.82909e+07	1.37983e+07	2.24242e+07
F8W1A4	AK2	4070600000	3.48334e+09	3.08188e+09	3.92317e+09
F8W1B9	YEATS4	9203700	2.98725e+07	3.67842e+07	6.24523e+07
F8W689	RFX5	127820000	6.69011e+07	6.85595e+07	1.25515e+08
F8W6A0	PPHLN1	10328000	1.06158e+07	1.15465e+07	1.13574e+07
F8W6W0	C1orf226	16769000	1.18398e+07	1.46058e+07	1.11041e+07
F8W733	BRE	96187000	6.84446e+07	7.56823e+07	7.46647e+07
F8W7C6	RPL10	388060000	6.68415e+08	2.88636e+08	3.9962e+08
F8W7U8	MRE11A	657530000	6.17597e+08	5.4777e+08	5.14728e+08
F8W7W8	HFE	93669000	8.73231e+07	5.38929e+07	3.70763e+07
F8W881	FAM120C	17842000	1.66246e+07	7.41022e+06	3.45444e+07
F8W8I6	TIA1	242010000	3.16796e+08	1.79432e+08	2.5509e+08
F8W8Z9	TOMM5	667730000	7.68481e+08	6.52572e+08	6.26783e+08
F8W930	IGF2BP2	166560000	2.07208e+08	1.76498e+08	1.93046e+08
F8W9I8	SLC26A6	68900000	5.21422e+07	4.72929e+07	8.04657e+07
F8W9U3	ABHD14B	74578000	5.61896e+07	1.20438e+08	8.29376e+07
F8WA11	CLASP1	87188000	7.34091e+07	3.10444e+08	4.34416e+07
F8WA39	MTMR1	8885800	3.00919e+07	1.22886e+07	1.62822e+07
F8WAJ0	DDX31	79502000	7.14603e+07	1.39127e+08	1.57615e+08
F8WAK2	GIT2	38201000	3.66991e+07	9.97396e+06	1.22815e+07
F8WBF4	TMEM50B	17941000	2.83002e+07	1.12899e+07	1.37166e+07
F8WBH6	SFXN5	15726000	1.87693e+07	1.65144e+07	1.06619e+07
F8WCF6	ARPC4-TTLL3	699520000	1.17116e+09	4.94654e+08	1.09795e+09
F8WCQ4	PARL	52996000	6.02839e+07	1.93115e+07	2.55768e+07
F8WD09	GPN1	1.4242e+07	1.16291e+07	1.76709e+07	1.41739e+07
F8WEU8	RNF7	15361000	1.40792e+07	1.54846e+07	1.23167e+07
F8WEV0	ACAD11	20042000	1.56669e+07	4.25792e+07	1.07926e+07
F8WF27	TM4SF1	652580000	6.08815e+08	6.15367e+08	5.21953e+08
F8WF48	SEC62	144040000	7.07608e+07	7.45956e+07	2.04557e+08
G3V0I5	NDUFV1	3694900000	2.51933e+09	1.95774e+09	2.32876e+09
G3V150	B3GAT3	47090000	7.04069e+07	1.24693e+07	2.43865e+07
G3V158	DERA	17050000	3.22645e+07	1.61008e+07	2.08313e+07
G3V167	PARP2	112550000	1.06032e+08	1.08406e+08	1.0297e+08
G3V1D3	DPP3	65814000	6.37645e+07	8.10664e+07	4.53135e+07
G3V1L9	TJP1	570250000	7.83708e+08	5.94513e+08	5.95857e+08
G3V1N5	USP28	15324000	1.75489e+07	2.01222e+07	9.5632e+06
G3V1P5	MED15	102640000	5.74569e+07	7.43517e+07	1.1456e+08
G3V1R5	NRD1	411830000	4.40528e+08	5.49558e+08	3.9682e+08
G3V267	GSTZ1	69266000	6.37997e+07	5.08217e+07	8.20618e+06
G3V2Q1	HNRNPC	513700000	4.84135e+08	1.11771e+09	1.62589e+09
G3V2Q3	CCNK	70033000	4.76146e+07	1.09598e+08	1.37922e+08
G3V2S6	ATP6V1D	92366000	6.30821e+07	9.89693e+07	6.11881e+07
G3V2U7	ACYP1	34977000	3.07066e+07	1.90217e+07	1.77969e+07
G3V2V8	NPC2	299510000	3.79493e+08	2.51715e+08	2.07053e+08
G3V2Y4	SHMT2	31301000	1.50956e+07	1.46134e+07	1.38365e+07
G3V325	ATP5J2-PTCD1	2288700000	2.18084e+09	1.81129e+09	1.83429e+09
G3V394	MYO5A	339110000	3.37132e+08	2.13052e+08	1.93941e+08
G3V4A5	MED6	32060000	3.57965e+07	4.89482e+07	4.22652e+07
G3V4P2	METTL17	8389900	1.7159e+07	1.61229e+07	5.5877e+06
G3V4P8	GMFB	59076000	5.72267e+07	8.99004e+07	1.40365e+08
G3V529	DDX24	460740000	4.28767e+08	4.01609e+08	3.19161e+08
G3V5L1	MAX	28257000	5.43139e+07	1.47244e+07	3.54269e+07
G3V5P8	CNIH1	44053000	1.2348e+08	9.23206e+07	4.93522e+07
G3V5S9	FCF1	55247000	6.40804e+07	2.81162e+07	5.03259e+07
G3V5T9	CDK2	372540000	1.98913e+08	2.20993e+08	1.99401e+08
G3XAH6	PAPOLA	24816000	1.12107e+07	1.00363e+08	3.69911e+07
G3XAM4	UTP23	18485000	2.00257e+07	1.79597e+07	2.20468e+07
G3XAN4	TRAM1	479630000	3.40643e+08	3.40129e+08	3.10962e+08
G5E9A6	USP11	28985000	2.5215e+07	3.81562e+07	2.48361e+07
G5E9F5	MPV17	189120000	1.12063e+07	3.96262e+07	1.32288e+08
G5E9P4	PQLC3	26973000	2.54054e+07	1.15843e+07	7.08904e+06
G5E9V7	ARMC8	10276000	1.16146e+07	1.40971e+07	1.47799e+07
G5E9W7	MRPS22	1438100000	1.3071e+09	1.07388e+09	1.91402e+09
G5E9Z2	CLPTM1L	76615000	9.47129e+07	7.30834e+07	4.28364e+07
G5EA30	CELF1	685660000	8.20554e+08	8.10352e+08	1.02561e+09
H0Y2P2	NGLY1	35094000	7.90938e+06	8.34728e+06	8.01214e+06
H0Y3H2	ABCA3	104670000	1.44953e+08	9.18987e+07	1.12004e+08
H0Y517	CC2D1B	37288000	5.423e+07	5.94714e+07	3.05771e+07
H0Y5B4	RPL36A	2235100000	2.85087e+09	2.10603e+09	1.96245e+09
H0Y5C6	FLNA	7530300	1.2376e+07	8.95811e+06	9.41488e+06
H0Y5D5	CIZ1	15958000	2.73172e+07	1.28013e+07	2.76974e+07
H0Y5N9	COL12A1	48283000	8.34725e+07	4.2802e+07	1.5949e+07
H0Y621	ERGIC3	178980000	3.5022e+08	2.56438e+08	1.88742e+08
H0Y630	STK24	17110000	6.12552e+07	6.6907e+07	3.00989e+07
H0Y6A5	ZDHHC3	39171000	4.32775e+07	2.34566e+07	1.97915e+07
H0Y6C7	IFT27	8938400	1.04543e+07	2.46121e+07	1.46559e+07
H0Y6H0	KDM1B	42675000	2.21027e+07	8.93236e+06	9.40405e+06
H0Y6I0	GOLGA4	27821000	9.80075e+07	4.66784e+07	8.09943e+07
H0Y720	TNRC6B	9.48433e+06	7.49011e+06	1.97462e+07	4.00776e+07
H0Y7H8	ARID1B	17144000	1.12613e+07	8.45356e+06	7.79738e+06
H0Y870	TMEM222	11737000	1.28318e+07	1.36228e+07	1.00291e+07
H0Y8C3	MTCH1	204780000	2.10159e+08	1.55634e+08	2.06809e+08
H0Y8X4	DNPH1	57051000	4.77509e+07	1.62678e+08	1.47756e+08
H0Y919	RIOK2	14312000	1.41605e+07	1.43272e+07	1.6165e+07
H0Y993	DEK	2641800000	2.64777e+09	2.60739e+09	2.23198e+09
H0Y997	TXNDC15	93570000	1.02494e+08	2.17729e+08	4.54761e+07
H0Y9G6	MRPL3	854710000	9.46768e+08	6.987e+08	8.38931e+08
H0Y9P1	BMP2K	46896000	4.34075e+07	1.52296e+07	1.49903e+07
H0Y9V7	ATP2C1	220180000	2.80474e+08	1.77332e+08	1.8316e+08
H0Y9Z5	CNOT6L	32365000	3.92518e+07	3.53591e+07	2.57359e+07
H0YAZ3	SORBS3	39451000	5.156e+07	1.92574e+07	4.13245e+07
H0YBL1	IMPA1	13216000	1.20402e+07	5.34271e+07	4.65282e+07
H0YC42	NA	274920000	2.55128e+08	6.47931e+08	6.41103e+08
H0YCP6	TMEM63B	66591000	5.15618e+07	1.65144e+07	1.03897e+07
H0YCW6	ALG9	49053000	4.34409e+07	5.32978e+07	3.03736e+07
H0YDK7	RAB30	16822000	2.19709e+07	1.0294e+07	9.69445e+06
H0YDN1	PLEC	50881000	2.84969e+07	4.675e+07	9.27364e+07
H0YDZ9	EHBP1L1	36573000	1.29383e+07	1.62081e+07	1.30897e+07
H0YE88	TEAD1	137240000	1.06835e+08	1.16421e+08	1.18898e+08
H0YEB6	SSSCA1	169130000	1.66472e+08	2.47671e+08	2.22346e+08
H0YEL0	GEMIN2	21550000	1.79668e+07	4.52267e+07	4.21652e+07
H0YF06	CCDC90B	64616000	4.40501e+07	8.88293e+07	4.51066e+07
H0YF29	C8orf82	20379000	3.39506e+07	1.5005e+07	1.97002e+07
H0YFD6	HADHA	26093000000	2.07e+10	2.13391e+10	2.23216e+10
H0YFG1	EPS8	7.64553e+06	1.32519e+07	7.1772e+06	1.03883e+07
H0YGR4	REXO2	151350000	1.52725e+08	1.81386e+08	2.57612e+08
H0YHD0	BRMS1L	8.31148e+06	5.35819e+07	8.0861e+06	1.39157e+07
H0YIV9	GATC	105580000	1.31297e+08	4.92013e+07	4.51918e+07
H0YJ75	PPP2R5C	80462000	9.91719e+07	1.10836e+08	9.0867e+07
H0YJ97	TRIP11	5594800	7.99784e+06	1.41154e+07	1.07682e+07
H0YK42	SNX1	50878000	4.96049e+07	8.46558e+07	4.01915e+07
H0YKD8	RPL28	6168300000	6.40669e+09	6.18888e+09	6.04603e+09
H0YKN8	TLE3	67374000	1.32804e+08	8.05611e+07	8.27393e+07
H0YL22	NDUFAF1	113500000	1.31811e+08	1.22611e+08	1.93541e+08
H0YLJ0	USP3	13883000	1.55063e+07	7.31591e+06	5.16041e+06
H0YLM3	PBX1	39253000	5.84191e+07	3.21751e+07	7.5795e+06
H0YLY0	CDC42BPB	7.94667e+06	8.71322e+06	1.70913e+07	1.96515e+07
H0YLZ3	TEX9	155500000	1.25917e+08	1.81505e+08	1.57398e+08
H0YM23	ANKRD17	33080000	3.29884e+07	1.1714e+07	2.2539e+07
H0YMA4	KIAA0101	38226000	3.18321e+07	8.84533e+07	6.97757e+07
H0YMB3	GMPR2	18788000	3.72362e+07	4.14402e+07	2.69184e+07
H0YMR5	ZFAND6	18870000	7.56036e+06	2.40206e+07	2.35319e+07
H0YMV8	RPS27L	235540000	2.17028e+08	1.7503e+08	5.21692e+07
H0YMZ1	PSMA4	3071500000	2.3741e+09	2.83097e+09	3.7025e+09
H0YN26	ANP32A	654210000	7.29117e+08	1.08259e+09	1.23367e+09
H0YNA7	SPPL2A	90727000	1.26016e+08	8.27575e+07	1.06491e+08
H0YNE9	RAB8B	41986000	4.70198e+07	3.59167e+07	3.08231e+07
H0YNG3	SEC11A	633370000	5.48763e+08	6.06645e+08	5.07094e+08
H0YNH6	EMC9	32234000	3.48496e+07	1.0151e+07	1.82091e+07
H0YNU5	BLM	57615000	5.62708e+07	1.14038e+07	8.96228e+06
H3BLU7	AKR7A2	270730000	2.84346e+08	3.40413e+08	3.52243e+08
H3BLV0	CD55	4864700000	4.93955e+09	4.19446e+09	4.42154e+09
H3BLV9	SRPK1	336720000	3.62541e+08	3.13268e+08	3.55852e+08
H3BM14	NUB1	11730000	1.18813e+07	3.24521e+07	9.44107e+06
H3BM30	MECR	37993000	4.23424e+07	3.92053e+07	3.49826e+07
H3BM79	AKTIP	1.16585e+07	8.73865e+06	1.92711e+07	2.74749e+07
H3BMU1	IST1	49394000	5.00084e+07	1.31186e+08	4.06158e+07
H3BN86	METTL9	9330500	7.39669e+06	3.81378e+07	2.03184e+07
H3BN98	RPS15A	333490000	3.9685e+08	3.17633e+08	5.55766e+08
H3BNC9	RPS17	7001700000	5.89264e+09	8.21999e+09	8.33914e+09
H3BP20	HEXA	311650000	1.82133e+08	2.12969e+08	1.31888e+08
H3BP28	COQ7	17477000	1.37191e+07	2.49936e+07	4.86036e+07
H3BPE1	MACF1	327170000	4.39951e+08	4.02168e+08	1.92046e+08
H3BPG6	ZNF598	139970000	1.34492e+08	9.51818e+07	6.20315e+07
H3BPK3	HAGH	38066000	7.36329e+07	4.86308e+07	4.30547e+07
H3BQQ6	FAM192A	12593000	1.53916e+07	2.32695e+07	4.78037e+07
H3BQQ9	UBE2I	737790000	5.84624e+08	3.40166e+08	5.0892e+08
H3BR29	C16orf58	44118000	2.17344e+07	2.80887e+07	2.02818e+07
H3BSB3	MPHOSPH6	49356000	4.72626e+07	8.29299e+07	9.39797e+07
H3BSS6	ZNF106	9.68999e+06	1.96816e+07	2.40564e+07	3.01406e+07
H3BSW0	LRRC57	38113000	4.26465e+07	2.47652e+07	2.56655e+07
H3BSZ4	MLST8	39468000	6.98653e+07	3.16294e+07	4.57891e+07
H3BT57	PML	143000000	3.68472e+07	9.12073e+06	4.7695e+07
H3BTL1	MAP1LC3B	57710000	6.52953e+07	1.03674e+08	1.081e+08
H3BUD2	DCTN5	1.24669e+07	1.01144e+07	3.75518e+07	3.52122e+07
H3BUK6	TRAPPC2L	20907000	1.97405e+07	8.63369e+06	9.51328e+06
H3BUP2	NOL3	22163000	2.57123e+07	5.59178e+07	5.88927e+07
H3BUX2	CYB5B	8222700000	5.93569e+09	6.82174e+09	5.59783e+09
H3BVI4	LMF1	14282000	1.36974e+07	1.79322e+07	1.72844e+07
H7BXF5	SAP130	69078000	1.26097e+08	2.18352e+07	6.43181e+07
H7BXH2	PPP6R3	145330000	1.67943e+08	1.53149e+08	1.64301e+08
H7BXI1	ESYT2	3373700000	3.45554e+09	3.40202e+09	3.08301e+09
H7BXZ6	RHOT1	64137000	1.12666e+08	7.7953e+07	7.11999e+07
H7BY10	RPL23A	6566400000	8.06012e+09	7.77338e+09	7.37604e+09
H7BY36	EWSR1	8077100	1.51895e+07	1.82223e+07	8.45513e+06
H7BYT1	CSNK1D	11532000	1.19734e+07	1.9438e+07	1.80891e+07
H7BZJ3	PDIA3	1619100000	1.84985e+09	1.39861e+09	1.21489e+09
H7BZJ7	FANCD2	12659000	1.47088e+07	1.17732e+07	7.50916e+06
H7C089	TTC38	4850500	6.75781e+06	1.02683e+07	1.21214e+07
H7C0X4	ALG3	75717000	3.26346e+07	8.14846e+07	6.26149e+07
H7C1A0	SENP2	8.75774e+06	7.33639e+06	9.62823e+06	8.68359e+06
H7C1N3	BET1	350320000	3.925e+08	3.76555e+08	3.15213e+08
H7C1R8	SLC22A5	16279000	2.55372e+07	2.6769e+07	1.70979e+07
H7C1T3	PCYT1A	48303000	2.09627e+07	7.0544e+07	4.59334e+07
H7C1U8	APOO	435140000	3.58705e+08	5.93155e+08	5.28378e+08
H7C2K2	NCKIPSD	9.88327e+06	9.14087e+06	2.21718e+07	1.17307e+07
H7C2Q8	EBNA1BP2	1634700000	1.78964e+09	1.72426e+09	1.83116e+09
H7C2Z6	GCA	49856000	4.51559e+07	2.14299e+07	4.42728e+07
H7C320	GALM	38046000	3.00892e+07	3.71272e+07	2.76096e+07
H7C3L5	TAX1BP1	23143000	2.47131e+07	1.18173e+07	2.49291e+07
H7C4I6	ALG12	75968000	1.04784e+07	6.74214e+07	9.92138e+07
H7C4M9	UBE2H	32862000	2.10114e+07	2.06696e+07	2.13721e+07
H7C5C6	STIM2	35672000	2.91206e+07	5.65799e+07	4.87192e+07
H7C5E4	XRN1	11990000	1.77349e+07	1.55836e+07	1.12712e+07
H7C5F7	NDFIP2	35840000	7.05956e+07	4.77872e+07	4.01168e+07
H7C5U3	MFSD1	43649000	6.05944e+07	6.18319e+07	1.41895e+07
I3L0A0	TMEM189-UBE2V1	452170000	3.42936e+08	4.66683e+08	4.68472e+08
I3L0N3	NSF	3343500000	3.26644e+09	2.07494e+09	2.04792e+09
I3L0U5	CCDC137	67854000	6.45344e+07	7.45846e+07	6.22071e+07
I3L0X5	SPAG7	20560000	2.05989e+07	2.02799e+07	9.15669e+06
I3L0Y2	PHF23	34258000	1.7224e+07	5.25981e+07	4.01811e+07
I3L112	DGKE	9624200	9.7818e+06	1.11871e+07	6.73609e+06
I3L1P8	SLC25A11	1805800000	1.92495e+09	1.72004e+09	1.55555e+09
I3L1Q2	BCL7C	20186000	3.34731e+07	1.01828e+07	7.03585e+06
I3L1U7	PAM16	196200000	3.63606e+08	3.10049e+08	3.73728e+08
I3L1Y9	FLYWCH2	146330000	7.34362e+07	2.16417e+08	1.57963e+08
I3L297	CRK	104830000	4.08855e+07	7.30852e+07	4.77741e+07
I3L2C7	GEMIN4	225010000	2.02667e+08	3.07399e+08	2.65298e+08
I3L2X7	CEP131	22000000	1.33535e+07	1.06388e+08	1.0024e+07
I3L397	EIF5A	5572200000	4.47199e+09	6.4751e+09	7.44151e+09
I3L3B4	VKORC1	385860000	4.94325e+08	2.63463e+08	2.5176e+08
I3L3E4	CHMP6	61330000	6.2165e+07	3.31536e+07	3.6199e+07
I3L3M4	CLDN7	31696000	2.23933e+07	1.82798e+07	2.06905e+07
I3L3W5	FN3KRP	15809000	7.13165e+06	2.42425e+07	2.76296e+07
I3L4X2	ABCC1	344630000	4.39039e+08	2.80841e+08	3.28203e+08
I3L4Z6	GOSR2	99618000	1.65678e+08	9.42831e+07	1.60606e+08
I3NI29	TMEM256-PLSCR3	16386000	9.44107e+06	2.06623e+07	3.10292e+07
I3VM54	KDM2A	345440000	3.77832e+08	2.32108e+08	3.44723e+08
I6L8B7	FABP5	446200000	5.15808e+08	4.31725e+08	4.07932e+08
J3KMX2	SMARCD2	145790000	1.7659e+08	1.64649e+08	1.55042e+08
J3KMY0	CDCA3	61815000	4.12953e+07	3.01356e+07	7.65549e+07
J3KMZ7	INTS2	97035000	4.55241e+07	6.68611e+07	5.14406e+07
J3KMZ8	DPF2	53648000	7.70349e+07	8.79508e+07	7.58532e+07
J3KMZ9	LDLR	293570000	3.68679e+08	2.23167e+08	2.20868e+08
J3KN16	KIAA0368	251570000	3.43053e+08	4.8154e+08	3.38219e+08
J3KN29	PSMD9	125670000	1.31477e+08	8.6257e+07	1.01414e+08
J3KN66	TOR1AIP1	129980000	1.03216e+08	8.45787e+07	7.032e+07
J3KN67	TPM3	9.20699e+06	1.34519e+08	1.23739e+08	1.29028e+08
J3KN90	FAM173B	13503000	4.87651e+06	2.92093e+07	4.45927e+07
J3KNE0	RGPD3	151060000	2.07912e+08	1.30773e+08	1.56085e+08
J3KNN7	BRAP	9857500	1.8512e+07	1.87108e+07	8.19116e+06
J3KP15	SRSF2	4055400000	4.419e+09	3.48804e+09	3.96864e+09
J3KPD3	RBM7	235450000	1.50369e+08	4.98074e+08	2.46317e+08
J3KPG5	BAZ2A	100250000	1.35187e+08	1.52636e+07	1.1083e+07
J3KPP4	LUC7L3	1237800000	1.11592e+09	1.03179e+09	1.02979e+09
J3KPT4	TRABD	389680000	5.10636e+08	1.70885e+08	1.99497e+08
J3KPX7	PHB2	14052000000	1.23389e+10	1.1588e+10	1.069e+10
J3KQ32	OLA1	1148000000	9.78451e+08	1.29296e+09	1.23689e+09
J3KQ48	PTRH2	1037600000	9.37923e+08	1.07755e+09	9.90921e+08
J3KQJ1	SUMF2	750930000	8.54808e+08	8.51363e+08	7.69374e+08
J3KQL8	APOL2	701180000	7.29523e+08	4.34174e+08	3.66059e+08
J3KQS6	BABAM1	66561000	5.12757e+07	7.2125e+07	6.66944e+07
J3KR33	MED19	82305000	5.89832e+07	1.23271e+08	1.2628e+08
J3KR35	CCDC12	118000000	1.58691e+08	1.67831e+08	1.2122e+08
J3KR44	OTUB1	562390000	7.10686e+08	3.24594e+08	3.187e+08
J3KR72	TAF6	73931000	8.18812e+07	6.12065e+07	5.24074e+07
J3KR97	TBCD	19804000	1.0104e+07	7.89984e+06	1.87612e+07
J3KS05	CBX1	1032700000	5.9384e+08	5.08602e+08	7.00896e+08
J3KS22	DCXR	176900000	1.80409e+08	1.39292e+08	1.47938e+08
J3KS23	CBFB	85868000	5.50884e+07	2.36978e+07	1.53572e+07
J3KS67	TVP23B	140050000	1.74352e+08	1.17155e+08	1.20237e+08
J3KT68	TMEM97	69011000	8.06734e+07	1.02262e+07	5.08702e+07
J3KTF8	ARHGDIA	875660000	1.06429e+09	1.23455e+09	1.24958e+09
J3KTG7	TEFM	11967000	1.46975e+07	9.13494e+07	5.71642e+07
J3KTI3	NADK	1.22201e+07	1.20768e+07	1.06021e+07	9.01628e+06
J3KTL2	SRSF1	7062800000	8.67797e+09	7.38638e+09	7.22615e+09
J3KTN3	POLI	29899000	3.09728e+07	2.02937e+07	1.84803e+07
J3QL56	SCO1	457470000	5.35611e+08	5.39792e+08	3.68937e+08
J3QLB2	SLC39A11	105180000	1.38229e+08	1.4396e+08	1.404e+08
J3QLE5	SNRPN	5098000000	5.32001e+09	5.28649e+09	4.96626e+09
J3QLS3	MRPS7	853290000	1.05111e+09	1.11185e+09	8.46234e+08
J3QLU9	ERBB2	50254000	3.29604e+07	2.74421e+07	5.00147e+07
J3QQ67	RPL18	8772400000	7.83401e+09	7.79961e+09	8.82499e+09
J3QQJ0	SAP30BP	229630000	2.33853e+08	1.56295e+08	7.96649e+07
J3QQW9	SUZ12	448180000	4.8464e+08	3.34773e+08	3.2349e+08
J3QQZ9	PNPO	60982000	5.50568e+07	1.72398e+07	6.61318e+07
J3QR07	YTHDC1	558990000	3.51141e+08	4.76542e+08	2.66697e+08
J3QR09	RPL19	3603800000	3.78464e+09	4.00462e+09	4.07532e+09
J3QRG6	CDKN2A	422460000	3.6376e+08	4.87849e+08	4.56709e+08
J3QRM9	ORMDL3	56859000	6.24584e+07	1.24669e+07	1.01625e+07
J3QRS3	MYL12A	1791500000	1.88731e+09	1.67905e+09	1.62163e+09
J3QRS9	ZNF207	965880000	1.04154e+09	7.66975e+08	9.3658e+08
J3QRU1	YES1	309400000	4.10372e+08	3.34296e+08	4.04402e+08
J3QRU4	VAMP2	58343000	9.75291e+07	1.35358e+08	1.28141e+08
J3QRV5	LLGL2	88114000	5.67366e+07	3.05812e+07	1.46069e+07
J3QRZ2	C17orf62	18765000	3.57956e+07	4.20968e+07	4.13166e+07
J3QS41	HELZ	8733000	7.77787e+06	1.51599e+07	2.40249e+07
J3QS48	MPDU1	280200000	3.39795e+08	3.45365e+08	2.95868e+08
J3QSB3	SS18	43335000	3.40111e+07	4.40061e+07	5.69616e+07
J3QSV6	RSL1D1	5039100000	3.40282e+09	4.10578e+09	4.0928e+09
J3QSX6	ABLIM1	32310000	4.33795e+07	4.71443e+07	5.62861e+07
J3QT28	BUB3	2618800000	3.11642e+09	2.38528e+09	2.69062e+09
J3QTA2	BAG1	163500000	1.85779e+08	2.49468e+08	2.52325e+08
J3QTA6	CHCHD6	101310000	6.54704e+07	8.83589e+07	7.65905e+07
J9JIC5	C17orf75	8.27438e+06	7.71433e+07	8.65394e+06	4.64612e+07
K4DIA7	CD151	523770000	6.32572e+08	3.10379e+08	1.73031e+08
K7EIH0	USP36	10531000	3.88781e+07	1.83394e+07	1.22924e+07
K7EIK7	EML2	94157000	1.20501e+08	3.90797e+07	6.34948e+07
K7EIN1	WBP2	15532000	1.42841e+07	1.04248e+07	1.21042e+07
K7EIN2	NUDT16L1	99246000	9.71681e+07	6.50059e+07	5.06224e+07
K7EIP7	YIPF2	218240000	1.42606e+08	1.84577e+08	2.03497e+08
K7EJE6	FMNL1	1.75644e+07	1.29446e+07	1.14128e+08	9.22495e+07
K7EJE8	LONP1	7003500000	5.40603e+09	7.14372e+09	5.69938e+09
K7EJH8	ACTN4	14282000	2.48909e+07	9.45357e+06	1.73956e+07
K7EJQ6	YIF1B	17786000	1.5138e+07	1.16174e+07	1.22054e+07
K7EJR8	HMG20B	7.03798e+06	8.86696e+06	1.45446e+07	1.23759e+07
K7EK35	STAT5A	13731000	1.13921e+07	2.21021e+07	1.82386e+07
K7EK42	TBCB	91539000	5.11376e+07	3.43843e+07	4.2826e+07
K7EK56	C19orf25	172870000	1.19589e+08	1.14605e+08	6.51937e+07
K7EKV4	VPS25	1.16839e+07	1.74803e+07	1.21541e+07	1.89464e+07
K7EL43	TRIM16	6128600	8.4061e+06	9.46682e+06	1.18573e+07
K7ELG9	LSM12	308090000	3.30435e+08	2.56401e+08	4.6383e+08
K7ELL7	PRKCSH	9501100000	9.35666e+09	8.10114e+09	9.33711e+09
K7ELQ9	TMEM205	544060000	5.36288e+08	6.03206e+08	4.72933e+08
K7EM56	RPS15	1491800000	1.57924e+09	3.15955e+09	2.74296e+09
K7EMK9	PPAP2C	55022000	1.61896e+08	2.01772e+07	8.09199e+06
K7EMM8	GLYR1	393100000	3.24929e+08	4.28176e+08	3.51956e+08
K7EN05	ELOF1	101060000	9.25466e+07	6.17283e+06	9.16433e+06
K7EN45	PIN1	200890000	1.56299e+08	1.73416e+08	1.67718e+08
K7EN59	CCDC151	1.0475e+07	9.94066e+06	1.47968e+07	1.35242e+07
K7EP32	UBXN6	12182000	1.33898e+07	1.65759e+07	1.87342e+07
K7EP90	RBM42	181230000	2.57737e+08	2.8174e+08	2.72227e+08
K7EPA3	TMEM161A	30004000	2.10629e+07	8.88302e+06	1.64035e+07
K7EPI4	GFAP	26398000	9.49025e+06	3.84634e+07	6.08794e+07
K7EPP6	ERC1	12995000	1.60063e+07	1.58523e+07	1.80499e+07
K7EQ55	DAZAP1	3233400000	2.65788e+09	3.14231e+09	3.47931e+09
K7EQX2	KEAP1	560660000	6.20784e+08	4.42005e+08	4.08202e+08
K7ER15	HDHD2	4518400	9.715e+06	5.32024e+06	4.90635e+06
K7ER88	ACAA2	16436000	2.47203e+07	1.81294e+07	1.44191e+07
K7ERE1	TMEM256	186080000	4.14172e+08	8.04309e+07	6.65796e+07
K7ERP4	GPX4	283010000	2.67386e+08	2.36547e+08	2.70036e+08
K7ES11	UBE2O	9.48433e+06	1.24987e+07	2.06577e+07	1.62467e+07
K7ES89	DUSP3	33458000	3.429e+07	8.82268e+06	1.16291e+07
K7ESE6	G6PC3	106710000	1.45314e+08	1.7404e+07	1.26671e+08
K7ESN3	GHDC	128270000	1.067e+08	1.19447e+08	4.52866e+07
K7ESP4	DCAKD	26909000	1.06664e+07	6.5248e+07	3.48939e+07
L0R6Q1	SLC35A4	251000000	3.20497e+08	2.58565e+08	2.97337e+08
L0R8F8	SMCR7L	52063000	4.5043e+07	3.58057e+07	4.11984e+07
L7UMD8	ATG5	10831000	1.60036e+07	2.76907e+07	3.22308e+07
M0QWZ7	SARS2	579670000	6.31714e+08	4.41574e+08	5.22022e+08
M0QXH1	RABAC1	86638000	7.86145e+07	7.59538e+07	6.37234e+07
M0QXI4	ZNF766	62653000	7.49318e+07	5.43405e+07	5.62983e+07
M0QXZ5	ZNF428	70929000	8.42803e+07	7.7908e+07	1.00935e+08
M0QYT9	IRF3	1.61714e+07	7.96557e+06	5.89249e+06	7.00957e+06
M0QZD8	NA	224860000	1.72393e+08	1.61971e+08	2.88303e+08
M0QZN1	HOMER3	8.34595e+06	1.30912e+07	2.16096e+07	1.74831e+07
M0QZQ2	MED25	60713000	6.82361e+07	4.06863e+07	5.98126e+07
M0QZR4	ARHGEF1	58489000	6.69526e+07	4.80183e+07	2.79531e+07
M0R0F0	RPS5	8132600000	6.06621e+09	6.53654e+09	6.73186e+09
M0R0N4	AP2S1	222710000	2.54334e+08	2.17325e+08	2.09922e+08
M0R165	EPS15L1	167590000	1.87873e+08	2.71505e+08	3.48966e+08
M0R1E3	NAT14	21757000	1.46741e+07	1.68822e+07	1.28132e+07
M0R226	MRPL34	136400000	1.40359e+08	8.11783e+07	7.23024e+07
M0R2A0	EMC10	172640000	1.67257e+08	8.37607e+07	1.10108e+08
M0R2B7	POLD1	154620000	2.10322e+08	2.50449e+08	2.09348e+08
M0R2Z9	SUGP2	432060000	5.02828e+08	7.07513e+08	5.13076e+08
M0R300	MYO9B	17603000	1.73242e+07	9.96213e+06	7.07011e+06
M0R3D6	RPL18A	5196500000	5.78513e+09	6.98865e+09	7.15311e+09
O00115	DNASE2	175490000	2.30378e+08	1.66437e+08	1.72213e+08
O00116	AGPS	2801300000	3.10405e+09	2.78365e+09	3.01397e+09
O00139-2	KIF2A	153720000	1.49818e+08	8.48419e+07	8.76066e+07
O00148	DDX39A	14514000000	1.35467e+10	1.4131e+10	1.70796e+10
O00151	PDLIM1	625640000	5.77728e+08	1.01849e+09	7.60497e+08
O00154-4	ACOT7	677640000	7.00937e+08	6.39971e+08	4.96547e+08
O00161	SNAP23	516180000	5.39791e+08	3.70814e+08	5.39707e+08
O00165	HAX1	210300000	3.93664e+08	3.99344e+08	3.68189e+08
O00170	AIP	260690000	2.84337e+08	3.00475e+08	2.47682e+08
O00178	GTPBP1	17474000	1.44439e+07	1.71949e+07	8.31148e+06
O00180	KCNK1	18106000	3.20506e+07	3.64449e+07	4.78819e+07
O00186	STXBP3	688880000	7.38748e+08	5.75493e+08	8.09769e+08
O00203	AP3B1	186630000	1.6705e+08	2.50624e+08	1.60589e+08
O00217	NDUFS8	1029800000	1.31757e+09	9.3797e+08	8.21124e+08
O00231	PSMD11	1753700000	1.74523e+09	2.25826e+09	2.28893e+09
O00232	PSMD12	1052200000	9.46227e+08	1.50242e+09	1.0743e+09
O00244	ATOX1	179520000	2.06838e+08	1.91822e+08	2.26963e+08
O00257	CBX4	28929000	3.25082e+07	1.64218e+07	1.12384e+07
O00264	PGRMC1	5279600000	3.47422e+09	3.35452e+09	4.37094e+09
O00267	SUPT5H	932960000	9.08768e+08	8.74693e+08	1.06474e+09
O00268	TAF4	108920000	1.10049e+08	2.61711e+07	6.84089e+07
O00273	DFFA	131440000	7.73382e+07	1.68528e+08	1.01779e+08
O00291-3	HIP1	118600000	1.73151e+08	1.28444e+08	1.22689e+08
O00299	CLIC1	3845200000	2.93671e+09	3.07537e+09	3.23716e+09
O00303	EIF3F	980580000	1.3729e+09	1.84183e+09	1.90916e+09
O00330-3	PDHX	569900000	4.33867e+08	4.18244e+08	4.31938e+08
O00400	SLC33A1	88516000	6.46157e+07	8.8899e+07	1.02692e+07
O00401	WASL	14892000	2.06477e+07	4.13888e+07	1.64058e+07
O00410	IPO5	3994200000	2.40045e+09	3.20128e+09	3.3328e+09
O00411	POLRMT	261880000	1.97432e+08	2.02084e+08	2.24711e+08
O00422-2	SAP18	981300000	9.1978e+08	8.15524e+08	7.27475e+08
O00425	IGF2BP3	1131200000	1.23299e+09	1.1278e+09	1.27028e+09
O00429-3	DNM1L	376880000	3.55808e+08	4.85346e+08	3.51374e+08
O00429-4	DNM1L	1.07695e+07	1.40217e+07	8.10875e+06	9.04062e+06
O00442-2	RTCA	24726000	2.01133e+07	1.27151e+08	1.21733e+08
O00443	PIK3C2A	227230000	2.64398e+08	2.68983e+08	2.82826e+08
O00461	GOLIM4	1196500000	1.01248e+09	1.11478e+09	1.06465e+09
O00468-6	AGRN	337460000	3.85242e+08	2.0433e+08	1.96558e+08
O00471	EXOC5	1.12063e+07	4.62291e+06	4.54532e+07	5.92927e+06
O00483	NDUFA4	1575600000	1.89137e+09	1.52929e+09	1.48556e+09
O00487	PSMD14	1315700000	8.38697e+08	1.2019e+09	1.24445e+09
O00488	ZNF593	94848000	1.19445e+08	8.24356e+07	7.61975e+07
O00499-9	BIN1	55110000	3.73653e+07	6.02363e+07	7.52933e+07
O00505	KPNA3	955960000	7.36275e+08	6.74013e+08	5.12415e+08
O00560	SDCBP	1171900000	1.34384e+09	7.52669e+08	9.22581e+08
O00560-2	SDCBP	70822000	6.30361e+07	5.59609e+07	6.69952e+07
O00566	MPHOSPH10	975550000	1.13452e+09	9.32376e+08	8.7424e+08
O00567	NOP56	2860300000	2.27896e+09	2.76466e+09	2.05922e+09
O00592-2	PODXL	991680000	1.07873e+09	1.27114e+09	1.3474e+09
O00625	PIR	141990000	1.76257e+08	3.56618e+08	3.32368e+08
O00629	KPNA4	1541500000	8.28966e+08	8.16882e+08	7.62975e+08
O00635	TRIM38	10711000	1.00752e+07	8.51664e+06	5.99211e+06
O00743	PPP6C	129310000	1.09742e+08	1.25298e+08	1.12621e+08
O00754-2	MAN2B1	89197000	1.33309e+08	1.23702e+08	1.35679e+08
O00762-2	UBE2C	84614000	7.55384e+07	4.39181e+07	1.04326e+08
O00764	PDXK	1232400000	7.59608e+08	1.13624e+09	1.18533e+09
O00767	SCD	833070000	5.83785e+08	6.26784e+08	4.69472e+08
O14494	PPAP2A	14207000	1.34591e+07	1.23748e+07	2.10061e+07
O14521-2	SDHD	210000000	1.74343e+08	1.9461e+08	1.76439e+08
O14530-2	TXNDC9	20896000	3.13862e+07	2.4104e+07	2.37284e+07
O14548	COX7A2L	399170000	4.36737e+08	3.32847e+08	4.48484e+08
O14561	NDUFAB1	2629900000	2.59064e+09	1.97608e+09	1.77952e+09
O14562	UBFD1	22943000	1.95284e+07	5.65854e+07	3.82387e+07
O14579	COPE	1053800000	1.15519e+09	1.17237e+09	1.44286e+09
O14617	AP3D1	190740000	1.82584e+08	2.56007e+08	1.85673e+08
O14646	CHD1	384050000	3.25515e+08	2.58217e+08	3.2862e+08
O14647-2	CHD2	238190000	1.02566e+08	2.6283e+08	1.20846e+08
O14656	TOR1A	49283000	2.93499e+07	2.83143e+07	9.43188e+07
O14657	TOR1B	147500000	1.10518e+08	9.86666e+07	1.69588e+08
O14662-2	STX16	174950000	1.68313e+08	1.47399e+08	1.35148e+08
O14672	ADAM10	613360000	5.21585e+08	6.46061e+08	6.38712e+08
O14681-3	EI24	17078000	1.42724e+07	5.70944e+07	4.62004e+07
O14684	PTGES	1135900000	1.11791e+09	9.39805e+08	8.24768e+08
O14715	RGPD8	40226000	2.47979e+07	2.42682e+07	1.19322e+07
O14732-2	IMPA2	33115000	4.19714e+07	5.60205e+07	3.10935e+07
O14734	ACOT8	95822000	8.05435e+07	1.44877e+08	1.39122e+08
O14737	PDCD5	286560000	4.64087e+08	3.3006e+08	3.61242e+08
O14744	PRMT5	806440000	8.8279e+08	9.78229e+08	1.04891e+09
O14745	SLC9A3R1	545960000	6.41616e+08	5.93275e+08	6.51172e+08
O14763-2	TNFRSF10B	12966000	1.01516e+07	1.61806e+07	1.14647e+07
O14776-2	TCERG1	1335900000	1.34086e+09	9.18804e+08	1.03822e+09
O14787-2	TNPO2	137120000	1.48871e+08	9.18254e+07	9.02062e+07
O14802	POLR3A	30962000	1.9115e+07	3.9109e+07	3.9176e+07
O14818	PSMA7	2335800000	2.25026e+09	2.2601e+09	2.5249e+09
O14828	SCAMP3	1251100000	1.41893e+09	1.09543e+09	1.26576e+09
O14828-2	SCAMP3	94822000	1.38274e+08	5.31886e+07	1.17916e+08
O14874	BCKDK	152890000	1.94788e+08	2.53412e+08	1.25115e+08
O14880	MGST3	3596100000	3.39019e+09	3.67705e+09	2.9745e+09
O14907	TAX1BP3	57689000	4.31231e+07	4.71709e+07	4.53379e+07
O14908	GIPC1	236540000	3.09286e+08	1.29379e+08	2.18303e+08
O14925	TIMM23	1350400000	7.12039e+08	1.27536e+09	7.04269e+08
O14929	HAT1	833020000	6.48666e+08	9.48058e+08	8.78326e+08
O14936-3	CASK	406090000	3.79682e+08	2.38454e+08	3.53278e+08
O14939-4	PLD2	20011000	1.47029e+07	3.18266e+07	2.66489e+07
O14949	UQCRQ	511030000	5.25728e+08	5.09299e+08	4.87714e+08
O14964-2	HGS	126370000	9.84498e+07	1.46253e+08	1.4593e+08
O14965	AURKA	272040000	1.70678e+08	1.56185e+08	2.03279e+08
O14966	RAB29	31955000	2.94718e+07	1.48158e+07	8.46505e+06
O14967	CLGN	272080000	3.5541e+08	4.16887e+08	3.60703e+08
O14974	PPP1R12A	755530000	9.44331e+08	6.44914e+08	5.93153e+08
O14975	SLC27A2	422930000	4.67427e+08	5.80757e+08	5.34812e+08
O14976-2	GAK	182370000	1.09408e+08	8.82736e+07	9.27711e+07
O14979-3	HNRNPDL	7061500000	5.02927e+09	5.44698e+09	6.80768e+09
O14980	XPO1	5422200000	4.30266e+09	5.03192e+09	5.07807e+09
O15020	SPTBN2	83733000	1.04579e+08	5.17379e+07	6.67057e+07
O15027-5	SEC16A	1837800000	1.96638e+09	1.38513e+09	1.4113e+09
O15031	PLXNB2	2065500000	2.19863e+09	1.81496e+09	1.84864e+09
O15042-2	U2SURP	1710500000	2.1581e+09	1.60605e+09	1.69388e+09
O15047	SETD1A	16550000	1.73476e+07	1.06054e+07	9.1765e+06
O15067	PFAS	681830000	5.02097e+08	7.23185e+08	6.17863e+08
O15084	ANKRD28	7253200	1.0058e+07	1.4241e+07	2.71236e+07
O15091-2	KIAA0391	234590000	2.37762e+08	2.20865e+08	1.78091e+08
O15118	NPC1	550960000	3.56737e+08	4.01939e+08	4.94217e+08
O15121	DEGS1	164210000	1.68593e+08	1.93298e+08	1.69822e+08
O15126	SCAMP1	466040000	4.18333e+08	5.2013e+08	4.62456e+08
O15127	SCAMP2	268980000	3.96372e+08	1.60614e+08	2.82774e+08
O15143	ARPC1B	427090000	4.19434e+08	4.12448e+08	5.05085e+08
O15144	ARPC2	1780400000	1.51416e+09	1.33497e+09	1.39591e+09
O15145	ARPC3	1618700000	1.06646e+09	1.17971e+09	1.08743e+09
O15164-2	TRIM24	142740000	1.56444e+08	1.33524e+08	1.54894e+08
O15173-2	PGRMC2	678740000	9.27994e+08	8.93722e+08	5.90727e+08
O15212	PFDN6	172390000	2.12813e+08	2.1197e+08	1.78282e+08
O15213	WDR46	200590000	1.49764e+08	2.23479e+08	2.35919e+08
O15226	NKRF	787900000	1.11321e+09	1.72481e+09	1.42e+09
O15228-2	GNPAT	19171000	4.16437e+07	7.46405e+07	7.31223e+07
O15230	LAMA5	758280000	7.19315e+08	4.49314e+08	4.84462e+08
O15231-4	ZNF185	271180000	3.0999e+08	2.52054e+08	2.56768e+08
O15235	MRPS12	212610000	2.33646e+08	1.79744e+08	2.60446e+08
O15254	ACOX3	40020000	5.1616e+07	8.00998e+06	1.04296e+07
O15258	RER1	858620000	8.96573e+08	6.38284e+08	5.27813e+08
O15269	SPTLC1	723430000	8.75786e+08	7.66333e+08	6.03178e+08
O15270	SPTLC2	271630000	2.27887e+08	2.35511e+08	2.27659e+08
O15294	OGT	733460000	7.08212e+08	6.7869e+08	6.45381e+08
O15305	PMM2	99443000	8.84442e+07	7.80493e+07	1.3341e+08
O15347	HMGB3	294160000	4.09153e+08	3.3802e+08	2.26285e+08
O15355	PPM1G	3567600000	2.76882e+09	7.102e+08	5.05277e+08
O15371-3	EIF3D	2093300000	2.0719e+09	2.51798e+09	2.38623e+09
O15379-2	HDAC3	14900000	1.96105e+07	4.42922e+07	4.26782e+07
O15381	NVL	488840000	4.86969e+08	3.75252e+08	3.61494e+08
O15382	BCAT2	883550000	7.06542e+08	7.79493e+08	8.93107e+08
O15397	IPO8	128820000	9.93886e+07	2.10961e+08	1.17003e+08
O15400-2	STX7	721690000	5.47725e+08	5.38453e+08	5.20188e+08
O15427	SLC16A3	2186100000	2.32626e+09	1.63072e+09	1.45956e+09
O15439-2	ABCC4	84724000	1.15158e+08	6.90987e+07	8.94759e+07
O15440-5	ABCC5	27710000	3.83934e+07	6.77773e+06	1.97645e+07
O15446	CD3EAP	623210000	5.72565e+08	3.59901e+08	2.96598e+08
O15460-2	P4HA2	573550000	3.70051e+08	5.54153e+08	6.25896e+08
O15479	MAGEB2	1946300000	2.19384e+09	1.86686e+09	1.92159e+09
O15498	YKT6	62211000	1.10915e+08	7.2933e+07	5.68651e+07
O15511	ARPC5	773800000	7.59428e+08	9.09386e+08	4.39989e+08
O15514	POLR2D	246920000	1.63674e+08	2.3054e+08	2.56299e+08
O15523-2	DDX3Y	1.41607e+07	1.18569e+07	7.04028e+07	1.1096e+08
O15551	CLDN3	33846000	1.16556e+07	2.02937e+07	3.05414e+07
O19617	HLA-C	698080000	1.19896e+08	9.39529e+08	1.12543e+09
O43143	DHX15	5356500000	5.24293e+09	6.26206e+09	5.61591e+09
O43148	RNMT	320110000	3.90297e+08	2.33227e+08	2.33719e+08
O43159	RRP8	413540000	5.11268e+08	3.72923e+08	2.97241e+08
O43172-2	PRPF4	1440100000	1.46316e+09	1.25537e+09	1.2135e+09
O43181	NDUFS4	478050000	4.28514e+08	2.00534e+08	4.90913e+08
O43237	DYNC1LI2	197500000	1.82376e+08	1.93454e+08	1.82264e+08
O43242	PSMD3	1583400000	1.36089e+09	1.19997e+09	1.40826e+09
O43251-8	RBFOX2	210080000	1.65894e+08	1.59615e+08	1.12456e+08
O43252	PAPSS1	138400000	8.31548e+07	3.50794e+08	3.1044e+08
O43264	ZW10	499590000	4.60558e+08	4.2426e+08	5.34612e+08
O43278-2	SPINT1	104330000	7.1695e+07	2.42966e+07	4.45745e+07
O43290	SART1	1260600000	1.58583e+09	1.15706e+09	9.31624e+08
O43324	EEF1E1	405240000	3.64807e+08	5.01816e+08	5.48097e+08
O43390	HNRNPR	12674000000	1.33923e+10	1.26949e+10	1.15838e+10
O43390-2	HNRNPR	105050000	3.36193e+07	8.04474e+07	9.34841e+07
O43395	PRPF3	377570000	4.58382e+08	4.97212e+08	3.43279e+08
O43396	TXNL1	731510000	7.58435e+08	8.85872e+08	8.60885e+08
O43399	TPD52L2	1509600000	1.49521e+09	1.70289e+09	1.79221e+09
O43399-2	TPD52L2	18743000	2.50642e+07	1.17899e+07	1.67684e+07
O43402	EMC8	384000000	4.79269e+08	4.14172e+08	3.64155e+08
O43447	PPIH	166810000	3.00702e+08	2.98769e+08	2.98398e+08
O43464	HTRA2	511560000	3.96119e+08	3.84505e+08	4.01663e+08
O43504	LAMTOR5	1420300000	9.52635e+08	1.07058e+09	1.07674e+09
O43513	MED7	6.18031e+06	2.22074e+07	2.08026e+07	3.25899e+07
O43583	DENR	277280000	2.52294e+08	2.73266e+08	2.34388e+08
O43592	XPOT	170830000	1.73747e+08	1.92922e+08	1.7583e+08
O43615	TIMM44	2147900000	2.0756e+09	1.93408e+09	1.82769e+09
O43633	CHMP2A	40218000	2.55191e+07	3.76188e+07	2.51621e+07
O43653	PSCA	174680000	1.82512e+08	1.35138e+08	1.36192e+08
O43657	TSPAN6	314190000	3.67632e+08	3.7097e+08	3.72032e+08
O43660	PLRG1	921850000	1.06249e+09	9.29075e+08	9.91008e+08
O43663-4	PRC1	416670000	6.03598e+08	5.85837e+08	3.74571e+08
O43676	NDUFB3	201120000	2.09004e+08	2.25643e+08	2.17199e+08
O43678	NDUFA2	454250000	5.34095e+08	2.47249e+08	2.69019e+08
O43681	ASNA1	726580000	7.95244e+08	8.30023e+08	7.84042e+08
O43707	ACTN4	54141000000	5.15402e+10	6.80359e+10	6.87028e+10
O43709	WBSCR22	166820000	1.64956e+08	1.97141e+08	1.4966e+08
O43715	TRIAP1	112350000	1.26576e+08	6.25656e+07	6.07029e+07
O43719	HTATSF1	1235500000	1.3738e+09	1.26142e+09	1.12169e+09
O43747	AP1G1	984510000	8.78006e+08	8.15194e+08	8.78848e+08
O43752	STX6	127870000	1.19607e+08	9.14521e+07	1.26089e+08
O43760	SYNGR2	234720000	2.74228e+08	1.43025e+08	1.83656e+08
O43765	SGTA	190340000	1.81501e+08	2.05266e+08	3.98768e+08
O43772	SLC25A20	488610000	5.01745e+08	5.94347e+08	5.99761e+08
O43776	NARS	1112300000	9.48303e+08	1.28058e+09	1.13742e+09
O43809	NUDT21	2686500000	2.84843e+09	2.37391e+09	2.87477e+09
O43813	LANCL1	1171100000	1.05951e+09	1.16623e+09	1.20524e+09
O43815	STRN	534170000	4.71552e+08	5.50338e+08	6.37965e+08
O43818	RRP9	1406400000	1.06212e+09	1.06608e+09	1.08256e+09
O43819	SCO2	127690000	1.15491e+08	1.49133e+08	9.91356e+07
O43823	AKAP8	892750000	9.79895e+08	8.79077e+08	1.15116e+09
O43824	GTPBP6	27476000	1.96304e+07	3.52225e+07	2.49352e+07
O43852	CALU	10195000000	1.31513e+10	1.08387e+10	1.09639e+10
O43852-2	CALU	496280000	1.41397e+08	3.27675e+08	8.34123e+07
O43865	AHCYL1	1123000000	1.20239e+09	1.0792e+09	9.5023e+08
O43896	KIF1C	68569000	7.87887e+07	3.50969e+07	6.14767e+07
O43913-2	ORC5	56154000	8.67617e+07	5.72448e+07	8.18516e+07
O43920	NDUFS5	1167100000	9.72223e+08	6.20355e+08	7.43969e+08
O43929	ORC4	96634000	6.4714e+07	2.39362e+07	2.70262e+07
O60216	RAD21	1267900000	1.53276e+09	1.55974e+09	1.66214e+09
O60220	TIMM8A	802320000	6.92263e+08	3.4177e+08	2.13217e+08
O60231	DHX16	676600000	5.29311e+08	3.63514e+08	3.78857e+08
O60244	MED14	314310000	5.04985e+08	3.03547e+08	2.50978e+08
O60256-4	PRPSAP2	41259000	1.10464e+08	4.59677e+07	5.46671e+07
O60264	SMARCA5	2727400000	2.48277e+09	2.53357e+09	1.74065e+09
O60287	URB1	463610000	7.77977e+08	4.40776e+08	3.48261e+08
O60293-2	ZFC3H1	108950000	1.06817e+08	7.00598e+07	1.60919e+07
O60306	AQR	1470700000	1.5231e+09	1.82724e+09	1.7896e+09
O60313-2	OPA1	1813800000	1.65732e+09	1.79937e+09	1.89777e+09
O60318	MCM3AP	85925000	6.34829e+07	5.21514e+07	3.02754e+07
O60337-5	45722	38507000	1.83198e+07	2.2546e+07	3.7904e+07
O60341	KDM1A	876400000	9.25376e+08	7.53127e+08	8.39427e+08
O60427	FADS1	343020000	2.54298e+08	4.8231e+08	3.57269e+08
O60437	PPL	2481800000	2.65166e+09	2.13033e+09	2.67245e+09
O60476	MAN1A2	121290000	1.07503e+08	9.31276e+07	1.16186e+08
O60488-2	ACSL4	1455100000	1.45964e+09	1.25142e+09	1.32688e+09
O60493	SNX3	156530000	1.97116e+08	2.94826e+08	2.18025e+08
O60502-2	MGEA5	146770000	1.93136e+08	2.86939e+08	1.68031e+08
O60503	ADCY9	49595000	6.39251e+07	1.94325e+07	4.10749e+07
O60506	SYNCRIP	9062200000	9.55704e+09	9.60989e+09	8.52981e+09
O60508	CDC40	163060000	2.10286e+08	2.00515e+08	1.34975e+08
O60512	B4GALT3	1.25739e+07	1.16146e+07	1.41906e+07	1.81134e+07
O60518	RANBP6	277920000	3.13862e+08	2.42554e+08	2.76201e+08
O60547-2	GMDS	86478000	1.02421e+08	5.91028e+07	5.70295e+07
O60563	CCNT1	119200000	2.21695e+08	1.015e+08	1.4713e+08
O60568	PLOD3	4201000000	3.09169e+09	3.80993e+09	3.87874e+09
O60573	EIF4E2	162250000	1.80454e+08	2.21296e+08	2.12078e+08
O60635	TSPAN1	54313000	6.81783e+07	1.28615e+07	7.1783e+06
O60664-4	PLIN3	1258400000	9.6455e+08	1.10084e+09	1.11743e+09
O60684	KPNA6	857300000	9.99662e+08	7.85674e+08	8.91368e+08
O60701	UGDH	2689900000	1.94986e+09	2.24322e+09	2.4976e+09
O60716	CTNND1	549410000	5.98922e+08	6.81157e+08	6.27757e+08
O60725	ICMT	144580000	1.22288e+08	1.43639e+08	8.06761e+07
O60739	EIF1B	9764400	1.41523e+07	1.0386e+07	1.29058e+07
O60749	SNX2	535790000	4.55566e+08	7.52788e+08	6.35973e+08
O60763	USO1	2003700000	2.07578e+09	2.29651e+09	2.24511e+09
O60783	MRPS14	182240000	2.22101e+08	2.00002e+08	1.68483e+08
O60784-4	TOM1	75550000	9.0272e+07	1.16403e+08	1.01831e+08
O60825	PFKFB2	254970000	2.18093e+08	2.33768e+08	2.16095e+08
O60826	CCDC22	41357000	4.73601e+07	4.42546e+07	2.97754e+07
O60828-2	PQBP1	519030000	4.33163e+08	5.2753e+08	5.31465e+08
O60830	TIMM17B	74639000	1.6e+08	1.54717e+08	1.81369e+08
O60831	PRAF2	305620000	1.79452e+08	2.6194e+08	2.46326e+08
O60832	DKC1	3981900000	2.68289e+09	2.51596e+09	2.47622e+09
O60869-2	EDF1	1633500000	1.41514e+09	1.57083e+09	1.56746e+09
O60870	KIN	8789000	1.00282e+07	2.57804e+07	9.2406e+06
O60884	DNAJA2	703470000	7.53136e+08	1.29728e+09	1.44704e+09
O60885	BRD4	638200000	6.72558e+08	5.68661e+08	6.15689e+08
O60888-3	CUTA	198020000	1.70913e+08	2.22507e+08	3.20491e+08
O60907-2	TBL1X	98848000	7.3567e+07	7.22131e+07	6.82289e+07
O60930	RNASEH1	36347000	3.64527e+07	3.23493e+07	8.40174e+06
O60934	NBN	207960000	2.08372e+08	6.72637e+07	1.27549e+08
O60942-3	RNGTT	94143000	1.61183e+08	8.53527e+07	1.21559e+08
O75054	IGSF3	18465000	1.59251e+07	8.88539e+06	1.4313e+07
O75063	FAM20B	33181000	7.68102e+07	8.79333e+07	9.05714e+07
O75083	WDR1	3083600000	3.22708e+09	3.67962e+09	3.63685e+09
O75116	ROCK2	799400000	8.01066e+08	1.05324e+09	9.87704e+08
O75128	COBL	73401000	7.25236e+07	7.21691e+07	7.78678e+07
O75131	CPNE3	5124300000	4.45755e+09	3.64477e+09	4.09975e+09
O75146	HIP1R	24115000	3.91714e+07	1.24369e+07	1.15822e+07
O75150-3	RNF40	97894000	1.69749e+08	9.43748e+07	1.21185e+08
O75152	ZC3H11A	474600000	5.80689e+08	5.5772e+08	4.33546e+08
O75165	DNAJC13	463160000	4.62083e+08	4.45041e+08	4.76906e+08
O75170-6	PPP6R2	15498000	3.29532e+06	1.00556e+07	1.64762e+07
O75190	DNAJB6	63089000	7.57027e+07	9.81256e+07	8.67223e+07
O75208	COQ9	383450000	4.49501e+08	3.71034e+08	4.18618e+08
O75223	GGCT	39916000	1.47887e+07	1.26765e+08	1.82012e+08
O75306-2	NDUFS2	2920100000	3.1472e+09	3.46613e+09	3.21552e+09
O75312	ZPR1	53118000	3.84231e+07	2.18921e+07	3.22499e+07
O75323	GBAS	627430000	5.35548e+08	5.23954e+08	5.56505e+08
O75340	PDCD6	3958700000	3.03933e+09	3.79718e+09	2.87608e+09
O75348	ATP6V1G1	341740000	4.382e+08	2.40389e+08	2.20886e+08
O75351	VPS4B	69886000	4.68889e+07	3.08344e+07	2.58238e+07
O75367-2	H2AFY	7149800000	6.67395e+09	8.31573e+09	7.54794e+09
O75368	SH3BGRL	58149000	5.71446e+07	5.19809e+07	8.57581e+07
O75369-8	FLNB	12229000000	1.40675e+10	1.51416e+10	1.44121e+10
O75376	NCOR1	185350000	1.33959e+08	8.03511e+07	6.18628e+07
O75379-2	VAMP4	11727000	1.84371e+07	2.03523e+07	3.03988e+07
O75380	NDUFS6	2105700000	1.36216e+09	7.33704e+08	6.90862e+08
O75381	PEX14	499670000	5.54097e+08	6.2108e+08	5.0952e+08
O75390	CS	11609000000	7.10469e+09	1.10396e+10	1.07987e+10
O75394	MRPL33	286130000	3.03202e+08	3.20687e+08	3.48087e+08
O75396	SEC22B	6295600000	7.48262e+09	6.35679e+09	5.79737e+09
O75400	PRPF40A	1213500000	1.47237e+09	1.31442e+09	1.43895e+09
O75410-2	TACC1	198250000	2.07767e+08	1.49215e+08	1.77552e+08
O75436	VPS26A	479450000	6.57773e+08	6.88438e+08	5.71051e+08
O75438	NDUFB1	413980000	4.17809e+08	3.45778e+08	3.5466e+08
O75439	PMPCB	3260500000	2.41824e+09	2.14106e+09	2.36466e+09
O75446	SAP30	98767000	8.79775e+07	3.34516e+07	8.30706e+07
O75475	PSIP1	1883600000	1.87937e+09	2.5487e+09	2.23903e+09
O75477	ERLIN1	331240000	3.85703e+08	3.87495e+08	3.20569e+08
O75489	NDUFS3	2544700000	2.59894e+09	2.25249e+09	2.15852e+09
O75506	HSBP1	18324000	1.15085e+08	1.18915e+08	1.36061e+08
O75531	BANF1	3817800000	3.4336e+09	2.84683e+09	3.44383e+09
O75533	SF3B1	8207400000	8.55079e+09	7.75935e+09	7.84025e+09
O75534	CSDE1	2288400000	2.4102e+09	2.66351e+09	2.92155e+09
O75554-2	WBP4	28989000	3.81803e+07	1.08142e+07	4.78776e+07
O75569-3	PRKRA	170550000	1.75868e+08	1.15641e+08	1.75474e+08
O75600	GCAT	247900000	2.84771e+08	2.06018e+08	1.80717e+08
O75607	NPM3	1890400000	1.80788e+09	1.8875e+09	2.1839e+09
O75608-2	LYPLA1	480030000	3.30047e+08	3.87092e+08	4.14079e+08
O75616	ERAL1	161460000	1.74171e+08	1.43126e+08	1.74257e+08
O75643	SNRNP200	13305000000	1.13876e+10	1.11478e+10	1.07361e+10
O75663	TIPRL	154410000	1.18317e+08	1.6132e+08	9.77096e+07
O75683	SURF6	306300000	2.41914e+08	2.3353e+08	1.69083e+08
O75691	UTP20	674770000	6.35253e+08	7.10081e+08	5.27604e+08
O75694	NUP155	4511700000	4.39906e+09	5.69183e+09	5.30882e+09
O75695	RP2	240930000	5.15519e+08	3.05134e+08	4.37355e+08
O75717	WDHD1	255380000	2.33601e+08	3.64413e+08	3.43575e+08
O75718	CRTAP	876790000	7.80242e+08	8.85157e+08	1.05909e+09
O75746	SLC25A12	615480000	5.89643e+08	5.43405e+08	5.73138e+08
O75781	PALM	174220000	2.20431e+08	1.81202e+08	1.91194e+08
O75787	ATP6AP2	592170000	4.10724e+08	6.47959e+08	4.72315e+08
O75794	CDC123	131760000	1.13605e+08	1.65777e+08	1.59545e+08
O75818-2	RPP40	159470000	1.43789e+08	1.63916e+08	1.93646e+08
O75821	EIF3G	1410100000	1.75959e+09	1.6365e+09	1.6451e+09
O75822	EIF3J	823150000	9.99572e+08	1.01134e+09	7.64645e+08
O75844	ZMPSTE24	2099500000	1.67122e+09	1.70647e+09	1.59128e+09
O75874	IDH1	2202500000	1.99535e+09	2.85224e+09	3.03458e+09
O75886	STAM2	20420000	1.51967e+07	2.10411e+07	8.75472e+06
O75907	DGAT1	80776000	1.45919e+08	8.00998e+07	6.62727e+07
O75911	DHRS3	302510000	3.23187e+08	2.41471e+08	2.31284e+08
O75915	ARL6IP5	1599200000	1.38797e+09	1.86063e+09	1.17985e+09
O75925-2	PIAS1	14880000	1.0596e+07	2.71056e+07	1.63128e+07
O75934	BCAS2	660850000	7.41366e+08	9.30175e+08	9.08322e+08
O75937	DNAJC8	609100000	5.62582e+08	9.09074e+08	8.90585e+08
O75940	SMNDC1	233200000	2.54858e+08	2.42645e+08	2.48569e+08
O75947	ATP5H	8634400000	9.62745e+09	6.88438e+09	7.36944e+09
O75955	FLOT1	2319500000	2.22309e+09	2.12942e+09	2.11869e+09
O75976	CPD	358350000	4.2114e+08	2.94147e+08	2.49726e+08
O76003	GLRX3	868570000	8.52371e+08	1.11478e+09	8.81978e+08
O76031	CLPX	1872500000	1.54007e+09	1.19053e+09	1.6005e+09
O76071	CIAO1	199410000	2.1553e+08	2.68048e+08	2.16234e+08
O76076-2	WISP2	27589000	1.06375e+07	6.32636e+06	1.81238e+07
O76094	SRP72	1849100000	1.85734e+09	1.68088e+09	1.96193e+09
O78179	HLA-C	1418200000	1.53736e+09	1.32543e+09	1.21794e+09
O94762-4	RECQL5	102300000	1.23308e+07	9.46407e+06	1.42122e+07
O94776	MTA2	973960000	1.1384e+09	1.3224e+09	9.75271e+08
O94806	PRKD3	324670000	2.95539e+08	2.24102e+08	2.30241e+08
O94822	LTN1	16640000	3.16643e+07	1.79102e+07	1.26489e+07
O94826	TOMM70A	5477400000	4.99154e+09	5.90789e+09	5.19423e+09
O94842-3	TOX4	227550000	2.65066e+08	2.06852e+08	1.68614e+08
O94855	SEC24D	115340000	1.15798e+08	1.85173e+08	6.45972e+07
O94864-2	SUPT7L	12978000	2.40045e+07	8.7595e+06	5.29371e+06
O94874	UFL1	1089200000	9.73576e+08	8.90907e+08	1.50129e+09
O94875-11	SORBS2	67613000	2.5622e+07	3.35323e+07	7.21337e+07
O94888	UBXN7	19180000	1.79289e+07	9.93361e+07	6.13828e+07
O94901-9	SUN1	182510000	2.98572e+08	4.11651e+08	2.05679e+08
O94903	PROSC	86016000	6.88968e+07	1.52572e+07	2.5722e+07
O94906	PRPF6	2288200000	2.55715e+09	1.95655e+09	1.78795e+09
O94913	PCF11	153420000	2.17317e+08	1.33542e+08	1.50825e+08
O94916-2	NFAT5	1.08077e+07	4.18459e+07	1.00015e+07	9.17951e+06
O94919	ENDOD1	25586000	2.37004e+07	3.21072e+07	2.20903e+07
O94925	GLS	67142000	1.06601e+08	9.62823e+07	9.40058e+07
O94925-3	GLS	3995200000	3.39551e+09	3.19633e+09	3.24769e+09
O94973	AP2A2	487380000	3.01343e+08	5.89423e+08	4.04454e+08
O94979-8	SEC31A	1958000000	2.18175e+09	2.89626e+09	2.71905e+09
O94992	HEXIM1	752510000	7.95533e+08	6.42585e+08	7.21389e+08
O95049-5	TJP3	6823100	1.03974e+07	1.70215e+07	1.35983e+07
O95071-2	UBR5	330750000	5.04678e+08	4.68132e+08	3.73015e+08
O95081	AGFG2	38236000	1.68981e+07	2.9113e+07	2.84573e+07
O95104	SCAF4	168480000	2.10899e+08	1.03197e+08	1.21333e+08
O95139	NDUFB6	393960000	3.82038e+08	3.84478e+08	3.69215e+08
O95140	MFN2	259800000	3.01451e+08	2.46845e+08	2.44552e+08
O95155-2	UBE4B	59140000	6.363e+07	8.11159e+07	6.9421e+07
O95159	ZFPL1	302830000	4.06337e+08	3.28711e+08	3.96638e+08
O95163	IKBKAP	151940000	1.35683e+08	2.06183e+08	1.94976e+08
O95167	NDUFA3	526740000	7.26021e+08	7.58061e+08	6.73178e+08
O95168-2	NDUFB4	367310000	4.03764e+08	5.05007e+08	4.49092e+08
O95169-3	NDUFB8	268280000	2.91206e+08	5.27338e+08	4.32181e+08
O95182	NDUFA7	237180000	2.76268e+08	2.96101e+08	2.79974e+08
O95197-3	RTN3	2602100000	2.95936e+09	2.67094e+09	2.57794e+09
O95202	LETM1	2810500000	2.42392e+09	2.31182e+09	1.93228e+09
O95210	STBD1	18572000	3.45662e+07	6.43452e+06	1.47244e+07
O95218-2	ZRANB2	588900000	6.89284e+08	6.60724e+08	8.00901e+08
O95219	SNX4	8639200	1.78468e+07	2.4403e+07	4.08802e+07
O95235-2	KIF20A	193130000	2.12028e+08	1.87374e+08	1.27532e+08
O95239	KIF4A	216420000	2.11179e+08	1.96086e+08	1.29184e+08
O95248	SBF1	14238000	1.01736e+07	4.42179e+07	7.7826e+07
O95251-2	KAT7	96939000	1.12043e+08	1.39522e+08	1.01883e+08
O95274	LYPD3	204870000	1.72348e+08	1.52278e+08	2.82887e+08
O95292	VAPB	1585100000	1.72357e+09	1.54378e+09	1.67536e+09
O95295	SNAPIN	60437000	3.91895e+07	7.33777e+07	7.41491e+07
O95297-2	MPZL1	352150000	4.84658e+08	4.31239e+08	4.13314e+08
O95298	NDUFC2	629980000	6.41075e+08	4.58375e+08	4.46188e+08
O95302	FKBP9	1097100000	1.2589e+09	9.08404e+08	1.23411e+09
O95336	PGLS	515560000	3.79691e+08	4.31615e+08	4.2733e+08
O95340	PAPSS2	18284000	1.91646e+07	2.14794e+07	2.44352e+07
O95347	SMC2	1061000000	1.05788e+09	1.46794e+09	1.25611e+09
O95365	ZBTB7A	41678000	1.81411e+07	2.69029e+07	2.58959e+07
O95372	LYPLA2	98987000	5.38355e+07	2.26606e+08	1.83516e+08
O95373	IPO7	3264700000	3.03067e+09	3.66384e+09	3.29064e+09
O95376	ARIH2	9.74185e+06	1.19237e+07	1.27059e+07	1.31375e+07
O95391	SLU7	105380000	2.12632e+08	8.89284e+07	8.089e+07
O95396	MOCS3	7.30651e+06	9.37562e+06	1.41741e+07	6.93533e+06
O95400	CD2BP2	767110000	6.7709e+08	5.91074e+08	6.92445e+08
O95415-2	BRI3	6.74337e+06	8.51351e+06	1.02216e+07	1.01005e+07
O95425-2	SVIL	176090000	2.50101e+08	2.24918e+08	1.6817e+08
O95429-2	BAG4	31893000	2.66529e+07	5.24788e+07	6.30418e+07
O95433	AHSA1	394270000	4.22413e+08	5.5662e+08	3.22569e+09
O95453	PARN	275340000	3.55013e+08	2.67699e+08	2.38518e+08
O95456	PSMG1	50370000	6.40416e+07	1.24106e+08	1.68423e+08
O95470	SGPL1	217690000	3.49146e+08	3.40734e+08	2.73914e+08
O95477	ABCA1	31992000	8.20175e+06	7.48955e+07	6.56327e+07
O95478	NSA2	471010000	4.43218e+08	3.71291e+08	4.01655e+08
O95486	SEC24A	357420000	3.19531e+08	3.35654e+08	3.40593e+08
O95487-2	SEC24B	417120000	3.34199e+08	2.77989e+08	3.32115e+08
O95571	ETHE1	1185000000	1.14679e+09	1.13376e+09	1.24776e+09
O95573	ACSL3	4177600000	4.90173e+09	4.42253e+09	3.95299e+09
O95602	POLR1A	1211000000	1.26133e+09	9.9923e+08	8.25611e+08
O95613	PCNT	34406000	3.95189e+07	7.06697e+07	8.18994e+07
O95633-2	FSTL3	104620000	7.92744e+07	9.84832e+07	6.91141e+07
O95639-3	CPSF4	87097000	2.4019e+08	2.0124e+08	2.03157e+08
O95674	CDS2	30992000	1.02448e+07	6.66117e+07	5.44367e+07
O95714	HERC2	96283000	1.27957e+08	5.82682e+07	7.61906e+07
O95716	RAB3D	41412000	4.72247e+07	9.92336e+06	1.40622e+07
O95721	SNAP29	168590000	2.61501e+08	1.13862e+08	2.09487e+08
O95747	OXSR1	47140000	7.03654e+07	5.81114e+07	6.91454e+07
O95757	HSPA4L	648460000	6.35325e+08	9.68142e+08	8.39035e+08
O95758-1	PTBP3	319290000	4.04378e+08	3.79141e+08	2.73505e+08
O95777	LSM8	562220000	2.88309e+08	4.07294e+08	4.85975e+08
O95782-2	AP2A1	2005100000	2.02559e+09	2.18728e+09	2.32649e+09
O95801	TTC4	52291000	4.70442e+07	6.70106e+07	7.59306e+07
O95816	BAG2	2020900000	1.74262e+09	2.44012e+09	2.74192e+09
O95817	BAG3	189450000	2.44216e+08	2.59547e+08	3.80779e+08
O95822-2	MLYCD	86843000	4.59132e+07	5.83416e+07	7.0353e+07
O95831-3	AIFM1	7869500000	8.23586e+09	6.48977e+09	7.04878e+09
O95857	TSPAN13	86574000	1.73549e+08	1.6243e+08	1.23428e+08
O95861-4	BPNT1	129090000	1.44421e+08	1.98727e+08	2.31232e+08
O95865	DDAH2	16797000	7.2454e+06	2.95835e+07	7.87894e+07
O95873	C6orf47	23539000	2.61699e+07	1.60935e+07	9.73507e+06
O95881	TXNDC12	1080800000	1.1124e+09	9.76304e+08	1.09465e+09
O95926-2	SYF2	24119000	2.77838e+07	1.455e+07	3.58599e+07
O95983-2	MBD3	288330000	2.51915e+08	2.72899e+08	2.06288e+08
O95985-3	TOP3B	36614000	5.25701e+07	2.26927e+07	4.14505e+07
O95994	AGR2	147430000	1.43978e+08	1.88135e+08	2.1799e+08
O96000	NDUFB10	2238300000	2.48169e+09	1.96783e+09	2.56177e+09
O96005	CLPTM1	1160400000	1.19409e+09	1.16173e+09	7.60071e+08
O96008	TOMM40	4305400000	4.36097e+09	4.2968e+09	5.08346e+09
O96011	PEX11B	11768000	8.97006e+07	1.17219e+08	9.64924e+07
O96019	ACTL6A	1019300000	1.38247e+09	1.1223e+09	1.15255e+09
O96028	WHSC1	137570000	1.25213e+08	7.3076e+07	1.04439e+08
P00167-2	CYB5A	940760000	1.72646e+09	1.22629e+09	1.29184e+09
P00338-3	LDHA	40559000000	3.32041e+10	4.58861e+10	4.27643e+10
P00367	GLUD1	3294100000	3.35986e+09	2.7996e+09	3.44583e+09
P00374-2	DHFR	83408000	4.76354e+07	5.09125e+07	2.52908e+07
P00387-2	CYB5R3	3311200000	3.35327e+09	3.28473e+09	3.44157e+09
P00390-2	GSR	430770000	5.80454e+08	6.21529e+08	5.6913e+08
P00395	MT-CO1	1782200000	4.0232e+08	9.73094e+08	9.51361e+08
P00403	MT-CO2	5781900000	4.34887e+09	4.3399e+09	4.64986e+09
P00414	MT-CO3	259930000	2.63559e+08	2.04862e+08	1.48886e+08
P00441	SOD1	841800000	6.13644e+08	1.61788e+09	2.61202e+09
P00491	PNP	1242700000	9.38825e+08	1.40686e+09	1.36261e+09
P00492	HPRT1	628760000	3.35047e+08	5.87103e+08	5.82093e+08
P00505	GOT2	12969000000	1.19923e+10	1.37147e+10	1.42869e+10
P00533	EGFR	2490900000	2.86829e+09	1.95499e+09	2.24677e+09
P00558	PGK1	17637000000	1.87494e+10	1.88823e+10	2.04818e+10
P00813	ADA	11891000	1.10374e+07	4.75561e+07	3.0924e+07
P00846	MT-ATP6	419380000	4.89821e+08	3.87596e+08	4.01507e+08
P00966	ASS1	1969500000	1.72926e+09	2.89406e+09	2.87425e+09
P01023	A2M	9324100	1.37001e+07	1.25463e+07	1.07726e+07
P01111	NRAS	775140000	7.98096e+08	6.03197e+08	6.80655e+08
P01112	HRAS	55263000	5.0197e+07	3.54114e+07	6.32713e+07
P02545	LMNA	73073000000	7.70891e+10	7.31787e+10	7.32457e+10
P02545-2	LMNA	4081500000	3.74989e+09	2.41811e+09	2.78e+09
P02786	TFRC	23782000000	2.46635e+10	2.05587e+10	2.08348e+10
P02792	FTL	73927000	8.62616e+07	3.73904e+07	8.65006e+07
P02794	FTH1	380090000	6.55264e+08	6.23675e+08	7.58724e+08
P03886	MT-ND1	16737000	1.32461e+08	8.82791e+07	8.74414e+07
P03897	MT-ND3	59333000	9.68341e+07	9.36595e+07	6.7516e+07
P03905	MT-ND4	48311000	3.5653e+07	1.53562e+08	1.20063e+08
P03915	MT-ND5	95945000	1.34636e+08	1.75581e+08	1.2255e+08
P03923	MT-ND6	24331000	3.91922e+07	4.18629e+07	2.69488e+07
P03928	MT-ATP8	499990000	4.74449e+08	3.69512e+08	1.48616e+08
P04040	CAT	3108400000	3.20379e+09	2.67589e+09	2.37953e+09
P04062-4	GBA	1863200000	1.66923e+09	1.58597e+09	1.717e+09
P04066	FUCA1	49552000	4.1558e+07	3.2729e+07	7.93703e+06
P04075	ALDOA	24220000000	1.97559e+10	2.59831e+10	2.49952e+10
P04080	CSTB	1743400000	9.68793e+08	1.09149e+09	7.98171e+08
P04083	ANXA1	23903000000	1.87494e+10	1.42786e+10	1.42843e+10
P04156	PRNP	153980000	1.36766e+08	9.9813e+07	1.50503e+08
P04179	SOD2	2171900000	2.45967e+09	2.28477e+09	2.58316e+09
P04181	OAT	2130000000	1.86339e+09	1.80441e+09	2.49717e+09
P04183	TK1	73180000	5.2079e+07	8.58911e+07	2.59194e+07
P04350	TUBB4A	396350000	2.06368e+08	3.86395e+08	3.35193e+08
P04406	GAPDH	70809000000	7.00405e+10	7.90379e+10	7.57602e+10
P04792	HSPB1	12574000000	1.06041e+10	1.1532e+10	1.05839e+10
P04818	TYMS	242590000	1.88361e+08	2.14491e+08	2.14434e+08
P04843	RPN1	16080000000	1.44276e+10	1.4872e+10	1.25663e+10
P04844	RPN2	11782000000	9.49837e+09	1.45914e+10	1.22637e+10
P04899	GNAI2	2866900000	2.6865e+09	2.38583e+09	2.61342e+09
P04920	SLC4A2	1048900000	9.00409e+08	1.27637e+09	1.06987e+09
P05023	ATP1A1	24000000000	2.57114e+10	2.01148e+10	2.07148e+10
P05026	ATP1B1	2170500000	2.4399e+09	1.71931e+09	2.7527e+09
P05091	ALDH2	3549300000	3.5032e+09	3.65541e+09	3.76249e+09
P05114	HMGN1	875780000	9.19599e+08	3.52179e+08	6.9321e+08
P05141	SLC25A5	49701000000	5.27343e+10	4.45224e+10	4.08176e+10
P05187	ALPP	65785000000	5.71211e+10	5.77831e+10	5.49958e+10
P05198	EIF2S1	4559500000	4.05913e+09	3.73583e+09	3.91065e+09
P05362	ICAM1	16824000	3.62965e+07	1.06443e+07	2.75601e+07
P05386	RPLP1	6647600000	7.20967e+09	6.5536e+09	8.03501e+09
P05387	RPLP2	16391000000	1.79677e+10	1.50187e+10	1.66779e+10
P05388	RPLP0	12952000000	1.50306e+10	1.52498e+10	1.53051e+10
P05423	POLR3D	13281000	4.24805e+07	3.09453e+07	2.35588e+07
P05455	SSB	2022400000	1.87278e+09	2.50523e+09	2.26702e+09
P05556	ITGB1	11534000000	1.2533e+10	9.23848e+09	8.97889e+09
P05783	KRT18	227290000000	2.16983e+11	2.07311e+11	2.1766e+11
P05976-2	MYL1	52443000	4.12285e+07	8.2099e+07	7.92485e+07
P06213-2	INSR	48437000	2.25531e+07	1.19181e+07	9.90312e+06
P06280	GLA	321290000	2.78317e+08	2.25001e+08	1.73465e+08
P06493	CDK1	1508000000	4.97015e+08	8.14378e+08	1.70431e+09
P06576	ATP5B	80306000000	7.07138e+10	7.32191e+10	8.23585e+10
P06730	EIF4E	980890000	1.14354e+09	1.13963e+09	9.20321e+08
P06733	ENO1	37890000000	3.02137e+10	3.66155e+10	4.04211e+10
P06733-2	ENO1	7.4354e+06	8.95481e+06	7.73899e+06	7.28979e+06
P06737	PYGL	1048600000	7.93682e+08	1.00042e+09	8.44756e+08
P06744	GPI	11195000000	5.19861e+09	6.65869e+09	6.76664e+09
P06748-2	NPM1	119530000000	1.20627e+11	1.27893e+11	1.14142e+11
P06753-2	TPM3	4521900000	4.93107e+09	5.92596e+09	5.47724e+09
P06756-3	ITGAV	871290000	7.09458e+08	6.00859e+08	6.68709e+08
P07099	EPHX1	6695000000	5.34971e+09	5.2565e+09	4.38867e+09
P07199	CENPB	159990000	1.24148e+08	1.79506e+08	1.64467e+08
P07237	P4HB	32915000000	3.33323e+10	2.48945e+10	3.28942e+10
P07305	H1F0	3286000000	3.35526e+09	2.58382e+09	2.05922e+09
P07355	ANXA2	145040000000	1.21566e+11	1.20236e+11	1.20724e+11
P07384	CAPN1	660490000	8.05498e+08	7.21269e+08	7.89415e+08
P07602	PSAP	4942600000	4.37351e+09	5.47761e+09	6.6324e+09
P07686	HEXB	402320000	3.26012e+08	3.80718e+08	3.27942e+08
P07711	CTSL	188600000	2.11631e+08	9.23114e+07	7.06252e+07
P07737	PFN1	8300700000	6.53017e+09	1.015e+10	9.47883e+09
P07741	APRT	373100000	1.66048e+08	5.06209e+08	2.75888e+08
P07814	EPRS	5722600000	5.96223e+09	6.44116e+09	6.43903e+09
P07858	CTSB	1176400000	1.07882e+09	1.15898e+09	1.37331e+09
P07900	HSP90AA1	19681000000	1.4285e+10	2.11832e+10	2.05566e+10
P07919	UQCRH	3645800000	3.28638e+09	1.97361e+09	2.66984e+09
P07942	LAMB1	1219600000	1.06339e+09	8.20293e+08	9.19973e+08
P07948-2	LYN	207280000	1.65958e+08	1.65071e+08	1.61615e+08
P07954-2	FH	10684000000	1.12278e+10	9.69792e+09	1.10239e+10
P08047	SP1	160550000	1.88568e+08	9.18345e+07	1.21446e+08
P08133	ANXA6	15061000000	1.38996e+10	1.1433e+10	1.22924e+10
P08195-2	SLC3A2	145360000	1.59431e+08	1.55167e+08	2.03957e+08
P08195-3	SLC3A2	22187000	2.4696e+07	1.95664e+07	2.00097e+07
P08236-3	GUSB	41793000	3.89079e+07	9.98955e+06	6.22297e+07
P08238	HSP90AB1	49653000000	3.98502e+10	5.34372e+10	5.01703e+10
P08240	SRPR	2048200000	2.17064e+09	2.12336e+09	1.84873e+09
P08243-2	ASNS	85507000	8.06852e+07	1.3722e+08	1.80795e+08
P08559	PDHA1	3686800000	4.17881e+09	3.26721e+09	5.39464e+09
P08572	COL4A2	115460000	1.18606e+08	5.55437e+07	9.9779e+07
P08574	CYC1	3872100000	3.06371e+09	2.7587e+09	3.15526e+09
P08579	SNRPB2	818940000	8.2022e+08	5.96759e+08	8.41913e+08
P08581	MET	206440000	2.06152e+08	1.19658e+08	1.05535e+08
P08621	SNRNP70	4514900000	4.71741e+09	4.2039e+09	3.68789e+09
P08648	ITGA5	169580000	1.50667e+08	1.4087e+08	1.42495e+08
P08651-4	NFIC	81719000	9.37652e+07	6.09057e+07	1.38983e+08
P08670	VIM	85637000000	9.86213e+10	9.48333e+10	9.98224e+10
P08754	GNAI3	1090800000	1.61038e+09	1.02958e+09	1.21324e+09
P08758	ANXA5	17724000000	1.54133e+10	1.43392e+10	1.14168e+10
P09012	SNRPA	3181200000	2.8302e+09	3.5703e+09	3.19613e+09
P09104	ENO2	78760000	2.23211e+07	4.74964e+07	2.3331e+07
P09110	ACAA1	1142800000	1.52969e+09	1.32038e+09	1.34218e+09
P09132	SRP19	138410000	2.20901e+08	1.97544e+08	2.58977e+08
P09234	SNRPC	2056400000	2.19917e+09	1.65896e+09	1.80178e+09
P09382	LGALS1	15374000000	1.68268e+10	1.59945e+10	2.18164e+10
P09417	QDPR	164460000	1.4878e+08	9.71168e+07	7.17911e+07
P09429	HMGB1	3551600000	3.07075e+09	4.77963e+09	3.46496e+09
P09493-4	TPM1	135310000	1.53005e+08	2.07173e+08	1.73778e+08
P09496-2	CLTA	2131200000	2.54009e+09	1.55066e+09	1.89829e+09
P09497-2	CLTB	676060000	9.63467e+08	7.66718e+08	7.2438e+08
P09525	ANXA4	6490300000	5.7057e+09	4.15988e+09	4.38772e+09
P09543-2	CNP	1402900000	1.35792e+09	1.0559e+09	8.64024e+08
P09601	HMOX1	122190000	1.46948e+08	1.16393e+08	1.14786e+08
P09622	DLD	6975400000	7.78969e+09	9.48975e+09	8.65067e+09
P09651-2	HNRNPA1	55093000000	5.50198e+10	5.72136e+10	5.94839e+10
P09661	SNRPA1	1288900000	1.48113e+09	1.11973e+09	1.72387e+09
P09669	COX6C	1220600000	1.24012e+09	9.29717e+08	1.01274e+09
P09874	PARP1	10238000000	9.69785e+09	8.46604e+09	7.44299e+09
P09884	POLA1	1.01966e+07	1.3571e+07	3.84487e+07	3.19352e+07
P09960	LTA4H	919950000	7.28052e+08	1.28141e+09	9.118e+08
P09972	ALDOC	1951800000	1.81185e+09	2.44764e+09	2.29102e+09
P0DMU9	CT45A10	9.13365e+06	4.93883e+07	8.46505e+06	1.28706e+07
P0DN76	U2AF1	3296700000	3.10757e+09	3.02465e+09	3.23343e+09
P0DN79	CBS	760820000	5.61327e+08	6.71894e+08	7.405e+08
P0DP25	CALM2	10674000000	1.15591e+10	1.29535e+10	1.20368e+10
P0DPB6	NA	211790000	2.18779e+08	1.70711e+08	2.01332e+08
P0DPI2	NA	53261000	1.37983e+07	5.81756e+07	5.15675e+07
P0DTW1	GAGE12F	174800000	1.47065e+08	2.21296e+08	9.14843e+07
P10109	FDX1	775900000	5.96358e+08	9.1807e+08	8.75196e+08
P10114	RAP2A	27935000	1.89218e+07	5.3771e+07	1.56954e+07
P10155	TROVE2	140050000	1.42552e+08	1.57203e+08	1.23141e+08
P10253	GAA	180920000	2.05809e+08	1.86411e+08	1.26419e+08
P10301	RRAS	316960000	2.43268e+08	1.18017e+08	1.64232e+08
P10412	HIST1H1E	20129000000	2.06034e+10	2.68892e+10	2.14556e+10
P10515	DLAT	3423000000	3.39317e+09	3.27794e+09	3.01215e+09
P10586-2	PTPRF	2119300000	2.47059e+09	2.25331e+09	2.79791e+09
P10589	NR2F1	184620000	2.1618e+08	9.13402e+07	1.28271e+08
P10599	TXN	3587700000	3.9945e+09	4.31991e+09	4.34398e+09
P10606	COX5B	2447600000	2.53458e+09	1.45189e+09	1.65397e+09
P10620	MGST1	1784900000	1.99526e+09	1.73948e+09	1.69257e+09
P10644	PRKAR1A	504340000	5.17044e+08	6.48674e+08	6.12402e+08
P10646-2	TFPI	75549000	9.06962e+07	6.7039e+07	6.30539e+07
P10696	ALPPL2	379580000	2.1618e+08	5.73723e+08	3.57608e+08
P10768	ESD	1042200000	8.9438e+08	1.1732e+09	1.07387e+09
P10809	HSPD1	95861000000	9.10663e+10	7.53604e+10	8.98584e+10
P10909-3	CLU	164460000	1.55983e+08	1.21621e+08	1.91463e+08
P11021	HSPA5	55863000000	5.64423e+10	5.1438e+10	5.37907e+10
P11047	LAMC1	533840000	5.87305e+08	3.01071e+08	3.123e+08
P11142	HSPA8	58071000000	7.0898e+10	6.60229e+10	6.9434e+10
P11166	SLC2A1	975670000	1.08767e+09	1.16925e+09	8.96411e+08
P11171	EPB41	75798000	5.44331e+07	4.89472e+07	1.1556e+09
P11172	UMPS	336460000	3.31473e+08	4.5953e+08	3.10327e+08
P11177-2	PDHB	4023900000	4.38588e+09	3.48291e+09	4.34007e+09
P11182	DBT	1163700000	8.52164e+08	6.8532e+08	1.08526e+09
P11216	PYGB	44580000	5.41163e+07	6.68235e+07	4.561e+07
P11233	RALA	404750000	4.179e+08	3.3757e+08	3.36228e+08
P11234	RALB	598540000	6.18861e+08	4.86574e+08	6.44581e+08
P11279	LAMP1	3515100000	2.21117e+09	3.10957e+09	3.08997e+09
P11387	TOP1	2869300000	2.57403e+09	3.12076e+09	1.79708e+09
P11388	TOP2A	6731800000	5.25854e+09	6.68125e+09	4.27556e+09
P11413	G6PD	4378200000	2.85574e+09	3.92686e+09	3.69528e+09
P11441	UBL4A	44944000	5.45279e+07	7.73853e+07	3.27073e+07
P11498	PC	4847700000	4.53987e+09	4.03819e+09	4.88453e+09
P11532	DMD	90078000	9.31965e+07	9.85199e+07	1.32888e+08
P11717	IGF2R	2097600000	2.29241e+09	1.90281e+09	2.4044e+09
P11766	ADH5	506910000	4.29408e+08	6.74774e+08	6.9181e+08
P11908	PRPS2	843490000	8.15661e+08	1.18154e+09	1.20663e+09
P11940	PABPC1	11052000000	1.22848e+10	1.07232e+10	1.15751e+10
P12004	PCNA	2499200000	2.3694e+09	3.43999e+09	3.06206e+09
P12036-2	NEFH	71742000	4.35871e+07	5.07639e+07	5.47263e+07
P12074	COX6A1	411590000	3.91651e+08	7.19205e+08	4.87635e+08
P12081-4	HARS	469990000	3.74781e+08	5.71302e+08	8.20855e+08
P12235	SLC25A4	449310000	5.29564e+08	5.29401e+08	4.45641e+08
P12236	SLC25A6	16575000000	1.51443e+10	1.4872e+10	1.92872e+10
P12268	IMPDH2	4437300000	4.69584e+09	5.27934e+09	5.97439e+09
P12270	TPR	6690200000	6.71259e+09	6.10048e+09	6.17289e+09
P12277	CKB	4711900000	3.26111e+09	4.40565e+09	4.63377e+09
P12429	ANXA3	5154000000	4.71128e+09	3.58543e+09	3.31168e+09
P12532	CKMT1A	4631100000	4.01399e+09	2.74357e+09	3.24873e+09
P12814	ACTN1	9284300000	9.07594e+09	1.18044e+10	1.27054e+10
P12931	SRC	44215000	6.56248e+07	1.09396e+07	1.79786e+07
P12955	PEPD	170970000	1.15934e+08	1.25564e+08	1.19324e+08
P12956	XRCC6	13813000000	1.10987e+10	1.31314e+10	1.39713e+10
P13010	XRCC5	20991000000	1.06077e+10	1.10267e+10	1.14551e+10
P13051-2	UNG	55634000	7.4354e+06	8.73959e+07	4.01481e+07
P13073	COX4I1	5218500000	5.94499e+09	4.29148e+09	4.22235e+09
P13196	ALAS1	23270000	2.24656e+07	1.74874e+07	9.81129e+06
P13284	IFI30	437870000	3.27871e+08	4.33091e+08	4.21157e+08
P13473-2	LAMP2	827890000	9.48664e+08	6.86888e+08	9.00758e+08
P13489	RNH1	1077700000	9.15086e+08	5.46165e+08	6.32548e+08
P13498	CYBA	35685000	3.3975e+07	1.37834e+08	9.9892e+07
P13639	EEF2	31443000000	2.41851e+10	3.20009e+10	3.26838e+10
P13667	PDIA4	13915000000	1.70732e+10	1.47702e+10	1.46756e+10
P13674	P4HA1	630920000	5.84678e+08	5.09006e+08	8.13569e+08
P13797	PLS3	3019500000	2.74111e+09	3.70575e+09	3.5946e+09
P13804	ETFA	8276800000	1.04759e+10	7.84207e+09	9.36493e+09
P13807	GYS1	285550000	2.88453e+08	5.34959e+08	6.87958e+08
P13861-2	PRKAR2A	926420000	9.72403e+08	9.98038e+08	1.11091e+09
P13984	GTF2F2	35540000	2.11829e+07	8.82892e+07	8.00179e+07
P13995	MTHFD2	1632300000	1.44231e+09	1.56157e+09	1.66632e+09
P14174	MIF	2664400000	2.63189e+09	2.61894e+09	2.61828e+09
P14209	CD99	1097900000	1.13063e+09	5.44569e+08	4.83418e+08
P14324-2	FDPS	721710000	5.44845e+08	8.76316e+08	7.40387e+08
P14373	TRIM27	70822000	1.3386e+08	3.77114e+07	1.06309e+08
P14384	CPM	1134500000	1.08054e+09	1.09543e+09	1.0943e+09
P14550	AKR1A1	108740000	1.94625e+08	1.31305e+08	2.1027e+08
P14618	PKM	37653000000	2.6568e+10	3.84881e+10	3.49348e+10
P14625	HSP90B1	40557000000	4.36259e+10	4.07194e+10	3.99951e+10
P14635-2	CCNB1	64980000	5.99491e+07	6.04802e+07	5.68269e+07
P14649	MYL6B	29791000	1.12793e+07	1.21676e+07	3.93108e+07
P14854	COX6B1	2554100000	2.51554e+09	2.04688e+09	2.68888e+09
P14859-6	POU2F1	52156000	1.16069e+08	6.87319e+07	7.1199e+07
P14866	HNRNPL	19701000000	2.06756e+10	1.86484e+10	2.10417e+10
P14868	DARS	3527300000	3.84403e+09	3.84817e+09	3.78049e+09
P14923	JUP	4557500000	3.98331e+09	3.98032e+09	3.33959e+09
P14927	UQCRB	1794800000	1.87855e+09	1.21887e+09	1.31862e+09
P15121	AKR1B1	2076400000	1.53483e+09	2.16546e+09	1.86646e+09
P15170-2	GSPT1	1296300000	1.35151e+09	1.16659e+09	1.2555e+09
P15291	B4GALT1	678920000	5.6149e+08	5.64882e+08	5.96135e+08
P15374	UCHL3	84524000	1.0039e+08	5.37756e+07	6.49772e+07
P15509-5	CSF2RA	83897000	9.69785e+07	1.1001e+07	6.4579e+07
P15529-15	CD46	159730000	1.58655e+08	5.1029e+07	6.44164e+07
P15529-7	CD46	881120000	1.17739e+09	1.13679e+09	1.29001e+09
P15531	NME1	862450000	8.916e+08	6.66373e+08	5.54123e+08
P15559-2	NQO1	1363800000	9.62023e+08	1.29388e+09	1.02413e+09
P15586	GNS	638310000	4.55638e+08	6.72793e+08	5.92431e+08
P15880	RPS2	11791000000	1.3071e+10	1.60046e+10	1.35348e+10
P15924	DSP	23539000000	1.67411e+10	1.46537e+10	1.56398e+10
P15927	RPA2	599250000	5.08289e+08	7.89232e+08	6.83576e+08
P16066	NPR1	76003000	9.87838e+07	7.4713e+07	6.60779e+07
P16070	CD44	1277200000	1.22595e+09	1.1101e+09	1.18907e+09
P16083	NQO2	78770000	9.64009e+07	1.16779e+08	6.97131e+07
P16104	H2AFX	38078000000	3.95271e+10	4.06671e+10	3.22482e+10
P16144-4	ITGB4	1860300000	1.8104e+09	1.45363e+09	1.27019e+09
P16152	CBR1	1245200000	1.13343e+09	1.32616e+09	1.24663e+09
P16219	ACADS	121230000	1.59919e+08	1.84274e+08	2.28754e+08
P16220-2	CREB1	108500000	1.73106e+08	1.58239e+08	1.58537e+08
P16278-3	GLB1	222080000	2.77604e+08	2.34383e+08	2.59055e+08
P16333	NCK1	27454000	1.3062e+07	7.07368e+06	1.31372e+07
P16401	HIST1H1B	12433000000	1.15383e+10	1.1908e+10	8.85456e+09
P16403	HIST1H1C	2901800000	2.47835e+09	2.59418e+09	2.03201e+09
P16422	EPCAM	809830000	7.65132e+08	7.52614e+08	9.05018e+08
P16435	POR	4429700000	4.6304e+09	4.38337e+09	3.91152e+09
P16615	ATP2A2	16445000000	1.57148e+10	1.53525e+10	1.15081e+10
P16930	FAH	18785000	1.99978e+07	3.03951e+07	2.89486e+07
P16949	STMN1	620740000	7.69456e+08	7.60592e+08	6.55336e+08
P16989	YBX3	1591700000	1.80896e+09	1.63741e+09	1.59919e+09
P17050	NAGA	93511000	1.21025e+08	8.54784e+07	9.38232e+07
P17066	HSPA6	4243400000	4.60161e+09	4.47425e+09	3.875e+09
P17096	HMGA1	2596400000	2.66222e+09	2.61197e+09	2.43996e+09
P17096-2	HMGA1	478070000	4.80723e+08	5.39315e+08	4.90844e+08
P17152	TMEM11	188410000	1.40639e+08	1.73187e+08	1.5938e+08
P17174	GOT1	762220000	6.20693e+08	7.70194e+08	8.42722e+08
P17252	PRKCA	101090000	5.0819e+07	7.00387e+07	6.30305e+07
P17275	JUNB	31897000	3.68011e+07	3.33168e+07	3.23864e+07
P17301	ITGA2	454440000	4.17647e+08	3.96143e+08	4.66203e+08
P17405-4	SMPD1	6952500	6.56853e+06	1.00281e+07	9.81705e+06
P17535	JUND	110470000	7.91543e+07	1.21969e+08	9.82139e+07
P17544-4	ATF7	14358000	1.23191e+07	4.77624e+07	2.25198e+07
P17568	NDUFB7	414610000	3.66612e+08	4.19335e+08	3.81275e+08
P17612-2	PRKACA	401830000	3.3734e+08	4.75744e+08	4.05437e+08
P17655	CAPN2	1061300000	8.13188e+08	1.11111e+09	9.58229e+08
P17676	CEBPB	482640000	4.55575e+08	3.50162e+08	2.53743e+08
P17706-2	PTPN2	44878000	4.18062e+07	4.51809e+07	3.03258e+07
P17844	DDX5	17330000000	1.93271e+10	1.59092e+10	1.55598e+10
P17858	PFKL	759410000	6.63081e+08	9.0635e+08	5.87579e+08
P17900	GM2A	317920000	1.85788e+08	1.75672e+08	1.09917e+08
P17931	LGALS3	4282600000	5.1959e+09	5.87616e+09	5.74146e+09
P17980	PSMC3	1.41591e+07	1.13274e+07	2.54173e+07	2.47665e+07
P17987	TCP1	5397600000	5.2135e+09	7.32053e+09	7.23667e+09
P18031	PTPN1	1195700000	1.18867e+09	1.14825e+09	1.1649e+09
P18084	ITGB5	188220000	1.94905e+08	1.60532e+08	1.85325e+08
P18085	ARF4	2141300000	2.23193e+09	3.05345e+09	3.00737e+09
P18124	RPL7	12748000000	8.90128e+09	1.45556e+10	1.15681e+10
P18206-2	VCL	1431800000	1.49512e+09	1.97333e+09	1.63006e+09
P18583-5	SON	2237400000	2.83597e+09	2.04028e+09	2.28893e+09
P18615	NELFE	65343000	1.03216e+08	9.82998e+07	6.82516e+07
P18669	PGAM1	3920700000	3.51421e+09	4.70884e+09	4.6063e+09
P18754	RCC1	3586000000	3.19414e+09	2.93386e+09	3.31342e+09
P18827	SDC1	148890000	1.66815e+08	1.54947e+08	1.55763e+08
P18846-2	ATF1	122320000	1.06285e+08	1.11799e+08	1.22515e+08
P18850	ATF6	23104000	3.18908e+07	8.67687e+06	7.74252e+06
P18858	LIG1	131410000	7.87129e+07	1.25032e+08	7.732e+07
P18859-2	ATP5J	2564000000	3.1991e+09	2.5243e+09	2.69949e+09
P18887	XRCC1	443600000	4.57272e+08	4.55422e+08	4.85592e+08
P19075	TSPAN8	209950000	2.16848e+08	1.84265e+08	2.22459e+08
P19338	NCL	36632000000	3.92662e+10	3.77123e+10	4.00037e+10
P19367-4	HK1	2273700000	2.35722e+09	2.61179e+09	2.30015e+09
P19387	POLR2C	432140000	4.22115e+08	2.36061e+08	4.0069e+08
P19447	ERCC3	190630000	2.32996e+08	1.65163e+08	8.10578e+07
P19525	EIF2AK2	917360000	9.48754e+08	1.04664e+09	9.93877e+08
P19623	SRM	519890000	4.83981e+08	5.77923e+08	5.39742e+08
P19784	CSNK2A2	407470000	5.58204e+08	6.85403e+08	6.13368e+08
P20020-6	ATP2B1	1935000000	2.06323e+09	1.73884e+09	2.2532e+09
P20042	EIF2S2	2660700000	3.46917e+09	2.83335e+09	2.84052e+09
P20073-2	ANXA7	3186200000	3.13844e+09	1.90795e+09	1.54224e+09
P20290-2	BTF3	3039500000	2.87289e+09	2.85591e+09	3.25525e+09
P20336	RAB3A	68256000	6.00682e+07	5.60508e+07	7.09504e+07
P20339	RAB5A	294110000	2.48025e+08	1.69611e+08	3.0591e+08
P20340	RAB6A	118810000	6.36733e+07	4.5887e+07	5.24979e+07
P20340-2	RAB6A	3138500000	4.20273e+09	3.28391e+09	3.93386e+09
P20618	PSMB1	1897700000	1.931e+09	2.44012e+09	2.1733e+09
P20645	M6PR	1195100000	1.40567e+09	1.26765e+09	1.0996e+09
P20674	COX5A	3274400000	3.48018e+09	3.93795e+09	4.95547e+09
P20700	LMNB1	18735000000	1.96891e+10	1.72774e+10	1.59659e+10
P20839	IMPDH1	356100000	4.67228e+08	4.70388e+08	5.39472e+08
P20851	C4BPB	63489000	8.39716e+07	1.67492e+07	2.78661e+07
P20933	AGA	17288000	1.99057e+07	5.01981e+07	2.36353e+07
P20962	PTMS	277830000	2.98518e+08	2.92662e+08	2.55473e+08
P21266	GSTM3	885240000	7.34271e+08	1.01968e+09	7.23606e+08
P21281	ATP6V1B2	1371200000	1.09119e+09	6.04664e+08	9.0867e+08
P21283	ATP6V1C1	294030000	2.03778e+08	2.70276e+08	2.49491e+08
P21291	CSRP1	950180000	1.71382e+09	2.44342e+09	2.23755e+09
P21333-2	FLNA	40099000000	4.26962e+10	4.85804e+10	4.75011e+10
P21359-2	NF1	15827000	7.26175e+06	1.67923e+07	9.38058e+06
P21399	ACO1	235560000	1.90699e+08	2.18297e+08	1.77169e+08
P21796	VDAC1	25729000000	2.71872e+10	2.80657e+10	2.77835e+10
P21912	SDHB	2127700000	2.06982e+09	2.0953e+09	1.46469e+09
P21953	BCKDHB	536480000	1.98236e+08	4.97066e+08	3.29281e+08
P21964-2	COMT	1836400000	1.50811e+09	2.03065e+09	2.13574e+09
P22033	MUT	715020000	7.17961e+08	6.14789e+08	6.49346e+08
P22059	OSBP	185470000	1.81663e+08	2.71597e+08	2.56603e+08
P22087	FBL	5085400000	4.99308e+09	6.49637e+09	6.75995e+09
P22102	GART	2034000000	1.98967e+09	2.25854e+09	2.23911e+09
P22234	PAICS	3741300000	2.51346e+09	2.82574e+09	3.06014e+09
P22307	SCP2	5712700000	6.38123e+09	4.98304e+09	5.0625e+09
P22314-2	UBA1	8512800000	6.96984e+09	9.45582e+09	8.54573e+09
P22413	ENPP1	64331000	5.00075e+07	6.42282e+07	6.67865e+07
P22570-7	FDXR	471900000	4.90769e+08	5.00991e+08	4.35772e+08
P22612	PRKACG	37860000	1.54503e+07	7.54604e+07	8.99106e+07
P22626	HNRNPA2B1	67123000000	7.63327e+10	7.3939e+10	7.89354e+10
P22670	RFX1	7305000	2.1154e+07	2.79264e+07	9.76227e+06
P22694-2	PRKACB	28869000	2.17498e+07	3.29913e+07	3.69624e+07
P22695	UQCRC2	7953200000	6.52764e+09	7.20242e+09	9.15191e+09
P23142-4	FBLN1	262320000	2.04482e+08	1.42108e+08	1.414e+08
P23229-4	ITGA6	888210000	1.07882e+09	7.68488e+08	1.53251e+09
P23246	SFPQ	23758000000	2.67151e+10	2.4348e+10	2.56473e+10
P23258	TUBG1	413940000	4.26881e+08	4.68279e+08	5.08441e+08
P23284	PPIB	13018000000	1.5333e+10	1.46601e+10	1.72544e+10
P23378	GLDC	723430000	7.18927e+08	9.40905e+08	7.16772e+08
P23381	WARS	758110000	5.84715e+08	5.8647e+08	8.07578e+08
P23396	RPS3	13236000000	1.50459e+10	1.65429e+10	1.57302e+10
P23497	SP100	67815000	8.86861e+07	4.22637e+07	3.12231e+07
P23511-2	NFYA	39265000	4.51477e+07	5.76877e+07	5.27291e+07
P23526	AHCY	2311300000	2.51816e+09	3.02502e+09	2.33023e+09
P23528	CFL1	13371000000	1.12034e+10	1.46702e+10	1.74039e+10
P23634	ATP2B4	467230000	5.40287e+08	3.65614e+08	4.22739e+08
P23919-2	DTYMK	252740000	3.37502e+08	4.87867e+08	4.29738e+08
P23921	RRM1	989000000	7.11706e+08	1.0338e+09	1.18038e+09
P24386	CHM	20833000	4.58139e+07	2.89525e+07	2.2026e+07
P24390	KDELR1	434740000	3.51033e+08	2.87746e+08	1.97506e+08
P24534	EEF1B2	2412000000	2.38303e+09	3.47016e+09	4.00159e+09
P24539	ATP5F1	4646300000	5.20799e+09	3.92181e+09	3.58712e+09
P24666	ACP1	367480000	5.63458e+08	1.09708e+09	9.83009e+08
P24666-2	ACP1	19103000	2.34476e+07	5.6798e+06	1.00756e+07
P24752	ACAT1	7353900000	7.85523e+09	5.71403e+09	6.18845e+09
P24928	POLR2A	1371900000	1.20943e+09	1.34405e+09	1.34157e+09
P25054-2	APC	10202000	1.36523e+07	1.16839e+07	1.82186e+07
P25205	MCM3	5777200000	5.62284e+09	5.63672e+09	5.7932e+09
P25325-2	MPST	1026500000	9.76736e+08	8.46741e+08	1.24785e+09
P25398	RPS12	9625600000	1.00896e+10	9.75111e+09	1.2548e+10
P25440-2	BRD2	200590000	2.41869e+08	2.00855e+08	2.0294e+08
P25445-6	FAS	41655000	4.31042e+07	1.1919e+07	5.19762e+07
P25490	YY1	272950000	2.54722e+08	2.99136e+08	1.69414e+08
P25685	DNAJB1	450160000	3.92599e+08	3.5504e+08	3.65563e+08
P25705	ATP5A1	61738000000	5.47553e+10	5.77941e+10	6.20236e+10
P25786	PSMA1	2112800000	1.80544e+09	2.17426e+09	1.86299e+09
P25788-2	PSMA3	1121600000	1.20871e+09	1.47913e+09	1.4766e+09
P25815	S100P	979840000	1.19427e+09	8.78279e+08	8.26124e+08
P26006	ITGA3	1022900000	1.21052e+09	7.60345e+08	8.84238e+08
P26038	MSN	6481400000	6.66583e+09	7.21232e+09	6.79751e+09
P26196	DDX6	1468100000	1.35647e+09	1.61605e+09	1.83316e+09
P26232-3	CTNNA2	34785000	1.20032e+07	5.49806e+07	1.75778e+07
P26358	DNMT1	403280000	4.92971e+08	4.96479e+08	1.18177e+08
P26368-2	U2AF2	6933400000	6.4483e+09	5.90881e+09	6.58188e+09
P26373	RPL13	9717300000	1.05337e+10	9.96112e+09	9.67619e+09
P26447	S100A4	8739800000	8.20102e+09	7.87462e+09	6.03856e+09
P26572	MGAT1	72160000	8.712e+07	5.41965e+07	5.08328e+07
P26583	HMGB2	574250000	6.04924e+08	8.29308e+08	7.16259e+08
P26639	TARS	4186800000	3.22573e+09	4.49736e+09	4.51718e+09
P26640	VARS	1849800000	1.84615e+09	2.06577e+09	1.95045e+09
P26641	EEF1G	9707700000	1.01076e+10	1.08736e+10	1.16446e+10
P27105	STOM	734180000	8.75506e+08	4.20234e+08	9.09192e+08
P27144	AK4	1591500000	1.41424e+09	1.41273e+09	1.60754e+09
P27338	MAOB	153170000	1.74036e+08	1.94124e+08	1.6398e+08
P27348	YWHAQ	4622400000	3.08925e+09	4.55284e+09	3.96186e+09
P27449	ATP6V0C	125530000	2.19014e+08	2.0124e+08	1.61997e+08
P27694	RPA1	960600000	1.11691e+09	1.2362e+09	1.30862e+09
P27695	APEX1	3095600000	2.90078e+09	2.63673e+09	2.36353e+09
P27708	CAD	2133600000	2.21334e+09	2.32393e+09	2.2845e+09
P27797	CALR	49923000000	5.4999e+10	5.65167e+10	5.36638e+10
P27824	CANX	20927000000	2.23599e+10	2.03909e+10	1.71787e+10
P28066	PSMA5	1973800000	2.46436e+09	3.50088e+09	2.85686e+09
P28070	PSMB4	1338800000	8.96709e+08	1.11927e+09	9.69358e+08
P28072	PSMB6	1504400000	7.7507e+08	1.44024e+09	9.2206e+08
P28074	PSMB5	1488300000	1.81149e+09	2.03459e+09	2.21451e+09
P28331	NDUFS1	6071900000	5.28751e+09	5.32868e+09	5.45724e+09
P28482-2	MAPK1	438020000	3.51962e+08	3.02337e+08	3.29594e+08
P28799	GRN	1752800000	2.33411e+09	1.64594e+09	1.81708e+09
P28838-2	LAP3	1796700000	1.64324e+09	1.93546e+09	1.48564e+09
P29317	EPHA2	216010000	2.20458e+08	1.68171e+08	1.87542e+08
P29320	EPHA3	929050000	1.46497e+08	2.09429e+08	6.2361e+08
P29353-2	SHC1	118630000	1.01501e+08	1.0781e+08	1.04683e+08
P29373	CRABP2	17833000	6.04807e+07	1.0195e+08	1.07517e+08
P29401	TKT	21099000000	1.68575e+10	3.07885e+10	2.43222e+10
P29692	EEF1D	4079100000	3.97843e+09	5.40626e+09	4.74706e+09
P29966	MARCKS	1648700000	1.90825e+09	1.35395e+09	1.60293e+09
P29992	GNA11	519640000	4.94488e+08	4.77074e+08	5.25257e+08
P30038-3	ALDH4A1	228780000	1.33535e+08	1.86191e+08	6.33582e+07
P30040	ERP29	10744000000	5.85247e+09	5.54024e+09	6.09803e+09
P30041	PRDX6	6223300000	4.80136e+09	6.10616e+09	6.71995e+09
P30043	BLVRB	970450000	8.94578e+08	1.19365e+09	1.11047e+09
P30044-2	PRDX5	6013800000	4.88169e+09	5.78721e+09	6.63927e+09
P30046	DDT	828010000	6.83932e+08	8.97262e+08	1.02692e+09
P30047	GCHFR	45680000	4.5358e+07	7.84418e+07	1.27523e+08
P30048-2	PRDX3	11050000000	1.0327e+10	1.04508e+10	1.24159e+10
P30049	ATP5D	7763500000	4.40664e+09	3.47511e+09	3.10805e+09
P30050	RPL12	8339900000	9.17794e+09	9.73461e+09	9.48752e+09
P30084	ECHS1	15494000000	1.44412e+10	1.21832e+10	1.45243e+10
P30085	CMPK1	418740000	3.17446e+08	4.61374e+08	4.8494e+08
P30086	PEBP1	1426500000	1.58457e+09	1.67813e+09	1.83847e+09
P30101	PDIA3	36548000000	3.1157e+10	2.74174e+10	3.13857e+10
P30153	PPP2R1A	3828900000	3.13086e+09	3.59259e+09	3.54843e+09
P30154-4	PPP2R1B	166970000	1.86258e+08	2.87792e+08	2.28702e+08
P30260	CDC27	340980000	2.29837e+08	1.52892e+08	1.89724e+08
P30405	PPIF	917250000	1.01167e+09	8.305e+08	9.92747e+08
P30414	NKTR	59420000	5.76501e+07	5.54896e+07	5.5214e+07
P30419	NMT1	1374200000	1.11926e+09	1.42851e+09	1.05283e+09
P30519	HMOX2	1918600000	1.82133e+09	1.53782e+09	1.67814e+09
P30520	ADSS	60360000	3.22753e+07	1.06819e+08	7.00026e+07
P30533	LRPAP1	1815100000	1.98642e+09	1.77415e+09	1.94219e+09
P30622-2	CLIP1	141390000	1.67862e+08	6.03766e+07	6.66431e+07
P30740	SERPINB1	146400000	5.65516e+07	1.23684e+08	1.57207e+08
P30825	SLC7A1	73927000	9.15989e+07	1.11175e+08	1.1602e+08
P30837	ALDH1B1	2062300000	1.86926e+09	1.52892e+09	2.04201e+09
P31040	SDHA	15278000000	1.39149e+10	1.36688e+10	1.47321e+10
P31150	GDI1	57618000	8.4191e+07	6.6641e+07	1.1329e+08
P31153	MAT2A	1010100000	1.04055e+09	1.45547e+09	1.34453e+09
[truncated: 3,022 more rows]

## Sheet: DIA_M1
Protein_ID	Genename	C2_1	C2_2	C2_3	M1_1	M1_2	M1_3
A0A024RBG1	NUDT4B	429004	342333	374597	466347	462890	434187
A0A096LP01	SMIM26	112570	120253	98899.4	82666.9	125282	96615.1
A0A0B4J2D5	GATD3B	1.09493e+06	1.08125e+06	993599	1.00203e+06	918063	1.01536e+06
A0A0B4J2F0	PIGBOS1	334448	273023	336291	297699	269428	276370
A0A0U1RQE8	GLYATL1B	26114.3	15380.7	30010.3	51294.4	42183.4	43816
A0A140G945	CRYAA2	82801.6	83266.4	85257.9	47083.6	43791.5	42730.5
A0AV96	RBM47	440423	387099	439373	269248	237707	256898
A0AVK6	E2F8	166225	18394.2	151275	286653	371628	287328
A0AVT1	UBA6	882875	877613	867240	915151	924958	905533
A0FGR8	ESYT2	749256	664261	797876	698855	604760	768990
A0JLT2	MED19	37609.1	35234.1	29724.6	43650	46710.2	41258.1
A0JNW5	UHRF1BP1L	104032	97014.6	101073	100181	101675	86724.4
A0MZ66	SHTN1	786760	838865	801538	832481	829970	787249
A0PJW6	TMEM223	168071	149403	144505	140054	131464	142218
A1KXE4	FAM168B	226177	256372	223139	153304	137640	154304
A1L0T0	ILVBL	553147	562636	588712	532177	504107	603390
A1L170	C1orf226	152243	111568	129753	142543	128739	115424
A1L188	NDUFAF8	151090	163176	123785	148844	153167	137413
A1L390	PLEKHG3	16812.5	16639.6	19715.5	29287.2	24639.7	12908.7
A1X283	SH3PXD2B	191223	204914	219057	131270	153961	148647
A2PYH4	HFM1	89507.2	145891	138763	184165	152463	208586
A2RRP1	NBAS	138545	138125	133149	128598	138632	124704
A2RTX5	TARS3	2.08053e+06	1.98721e+06	2.24489e+06	2.18752e+06	2.24336e+06	2.02216e+06
A2RU67	FAM234B	57764.4	56937.7	54698.7	40129.5	24726.9	41280.2
A2RUC4	TYW5	89072.5	89215.3	79238.9	91987.5	89487	86864.6
A2VDF0	FUOM	39530.2	41488.6	42760.7	38331.2	46009	46063.5
A2VDJ0	TMEM131L	7871.16	10639.1	10235.4	31498.5	3683.7	14619.7
A3KMH1	VWA8	351196	340041	333949	366788	358387	379679
A3KN83	SBNO1	226700	210709	232903	176179	178647	170103
A4D0S4	LAMB4	466104	426220	604804	487414	436970	400348
A4D1E9	GTPBP10	469677	468253	503448	510102	553539	590739
A4D1P6	WDR91	167177	185726	177383	150718	180762	147857
A5D8V6	VPS37C	111266	130386	130112	143166	137504	115035
A5PLL7	PEDS1	80346.9	72868.4	102678	88722.3	61864.3	87452.7
A5PLN9	TRAPPC13	104053	94915.5	90959.6	71537.1	81661.2	80663.6
A5YKK6	CNOT1	753053	769473	780075	732703	774529	730863
A6NCE7	MAP1LC3B2	152584	149537	157905	155340	158234	140183
A6NCS6	C2orf72	488001	515106	509793	612122	576322	582642
A6ND36	FAM83G	108626	103064	110322	112593	135646	112138
A6NDB9	PALM3	38071.2	34865.1	40047	44404.7	42006.4	43057.6
A6NDG6	PGP	1.1371e+06	1.20291e+06	1.13373e+06	1.15927e+06	1247813	1.19016e+06
A6NDU8	C5orf51	172727	185705	203124	237396	233572	226559
A6NED2	RCCD1	105781	86538.2	98186.6	100915	117829	93369.2
A6NH11	GLTPD2	265855	241688	282678	244702	245743	243172
A6NHL2	TUBAL3	876554	810340	790984	999755	873604	986585
A6NHQ2	FBLL1	538340	706603	725086	730058	639614	689870
A6NHR9	SMCHD1	364787	363609	359439	353021	366493	368290
A6NHX0	CASTOR2	75731.6	69229	70489.1	61998.9	59044.6	52813.2
A6NIH7	UNC119B	347223	346493	347786	259118	297346	258322
A6NJ78	METTL15	122692	123886	141595	112009	129837	112323
A6NKD9	CCDC85C	126862	96138.5	99366.2	97192.1	98978.6	86974.1
A6NKF1	SAC3D1	130820	147207	135821	152180	155228	149202
A6NKF7	TMEM88B	74652.1	76391	84937.3	55271	66090.6	55455.2
A6NNL5	C15orf61	66601.5	43725.2	34864.2	87340.3	9339.02	68746.5
A6NNY8	USP27X	88405.6	77730.7	80095.2	95914.4	93741	103321
A6QL63	BTBD11	148288	190134	206274	95250.3	136611	111684
A6ZKI3	RTL8C	202778	182631	217470	192359	218778	198691
A7E2V4	ZSWIM8	56423.1	58748.2	53363.7	52757.9	61342.1	56626.3
A7KAX9	ARHGAP32	10937.6	8927.53	10176.7	4422.37	8799.77	4729.39
A8CG34	POM121C	54192.8	41493.2	60169.8	52866.7	46585.6	77296.3
A8MQ03	CYSRT1	78653.6	107309	66123.3	15286.3	6724.04	15653.8
A8MT69	CENPX	26017.2	48149.8	41949.5	55651	75511	35661.5
A8MTT3	CEBPZOS	61002.1	64352.9	73077.3	37915.7	22412.8	20592.5
A8MWD9	SNRPGP15	4.22961e+06	3.94412e+06	3.87073e+06	4.43452e+06	4.29741e+06	4.50579e+06
A8MXV4	NUDT19	230887	203778	219623	183876	179430	178867
A9UHW6	MIF4GD	173379	158384	157139	123559	128136	129765
B0YJ81	HACD1	29047.3	39793.3	22478.7	25805.6	14384.3	7521.39
B1AK53	ESPN	683569	811066	766464	504604	495487	496416
B2RUZ4	SMIM1	280563	295993	297448	243497	265172	253050
B7ZAP0	RABGAP1L	60396.1	55411.7	70902.4	37950.3	12825.8	28124.5
B7ZAQ6	GPR89A	101934	125197	109793	113042	104505	142612
B7ZW38	HNRNPCL3	1.21635e+07	9.15672e+06	1.27043e+07	1.34638e+07	13757664	1.32211e+07
C4AMC7	WASH3P	285668	295764	288874	293678	302596	301474
C9J7I0	UMAD1	26780.5	24661.2	33044.1	29895.2	30388.1	31682
C9JLW8	MCRIP1	663595	583444	637852	598092	648777	547913
D6REC4	CFAP99	29156.6	26932	27913	37604.9	26460.3	37598.2
E9PAV3	NACA	6.14833e+06	6.43876e+06	6.22481e+06	7.48687e+06	7684674	7.49214e+06
E9PRG8	C11orf98	1.5156e+06	1.567e+06	1.41651e+06	1.65981e+06	1.53419e+06	1.67121e+06
H3BR10	SMLR1	824768	1.77208e+06	618249	620667	447945	660950
L0R819	ASDURF	78388.4	94836.5	78439.2	96751.2	102583	93379.2
L0R8F8	MIEF1	736076	753769	793837	653880	701896	699028
O00115	DNASE2	304412	269938	265598	100895	97826.6	88471.6
O00116	AGPS	189376	201393	197197	200919	207462	184226
O00124	UBXN8	45330.4	29768.1	31886.1	51449.5	53173.4	58866.2
O00139	KIF2A	693972	673356	722114	666878	719177	689776
O00142	TK2	31686.8	39395.1	37126.3	30464.4	34539.4	38882.2
O00148	DDX39A	1.08033e+06	1.01335e+06	993522	1.0846e+06	1092716	1.05604e+06
O00151	PDLIM1	4.52841e+06	4.49111e+06	4.2208e+06	5.33933e+06	5.44493e+06	5.26838e+06
O00154	ACOT7	3.40263e+06	3.60407e+06	3.33241e+06	3.66655e+06	3836074	3.5338e+06
O00159	MYO1C	1.35358e+06	1.36547e+06	1.34916e+06	1.08993e+06	1.14471e+06	1.10447e+06
O00161	SNAP23	923106	973810	831789	854585	892907	895285
O00165	HAX1	342800	299662	325577	330735	345277	333431
O00168	FXYD1	429067	437715	462345	191759	156912	148605
O00170	AIP	996281	951176	1.00609e+06	1.00162e+06	1.067e+06	921848
O00178	GTPBP1	325394	338102	312370	322512	344929	332803
O00186	STXBP3	504986	497167	491939	472468	481284	471573
O00189	AP4M1	106590	105639	101549	82703.5	79646.1	74135
O00192	ARVCF	81414	88829.9	72347.1	51525.4	54135.5	54667.5
O00193	SMAP	1.3218e+06	1.36515e+06	1.21632e+06	1.14233e+06	1.20577e+06	1.08027e+06
O00203	AP3B1	851184	814884	827383	861322	868486	838055
O00214	LGALS8	288883	281981	297083	408547	441688	432161
O00217	NDUFS8	1.30019e+06	1.19104e+06	1.1462e+06	1.16261e+06	1.23258e+06	1.30863e+06
O00220	TNFRSF10A	36730.5	30958.8	42199.5	48400.1	46413.6	44270.3
O00221	NFKBIE	53021.4	63594	63226.1	54552	61727.8	63644.4
O00231	PSMD11	2.78773e+06	2.80503e+06	2.73494e+06	2.98598e+06	3.1268e+06	2.97221e+06
O00232	PSMD12	919189	925621	894082	905367	959721	957729
O00233	PSMD9	1.3705e+06	1.38632e+06	1.30991e+06	1.40026e+06	1.4102e+06	1.3048e+06
O00244	ATOX1	1.00748e+06	945468	906164	1.14476e+06	1.09614e+06	986962
O00255	MEN1	194230	225524	189021	180722	204750	176620
O00257	CBX4	187683	153921	204541	184933	187785	194202
O00258	GET1	63513	60317.7	70881.2	63469.8	62447.2	74438.1
O00264	PGRMC1	3.5963e+06	3.14882e+06	3.83096e+06	3.19473e+06	2.90746e+06	4.27502e+06
O00267	SUPT5H	886370	884187	887845	846909	881853	849380
O00268	TAF4	198671	188912	194036	186843	214829	198093
O00273	DFFA	840646	850368	807242	719812	748496	696185
O00287	RFXAP	28370.8	27700.7	25829.1	26421	29424.9	23962.5
O00291	HIP1	113087	107363	96410	95608.2	92588.3	90904.7
O00299	CLIC1	9.59984e+06	9.18557e+06	8.8667e+06	9.46721e+06	9306661	9.53523e+06
O00303	EIF3F	1.91461e+06	1.79151e+06	1.95104e+06	2.40603e+06	2.43753e+06	2.54947e+06
O00308	WWP2	61945.1	74678.2	63205.3	81698.6	85864.1	79963.5
O00311	CDC7	36110	27744	29888.9	32815.7	33021.8	36356
O00329	PIK3CD	37794.4	37368.2	34608.2	2020.91	15809.4	8773.61
O00330	PDHX	742868	749007	793811	694301	699637	706389
O00399	DCTN6	473900	437917	449385	505373	491903	507468
O00400	SLC33A1	215055	206861	225471	171487	147983	187606
O00401	WASL	263106	262855	252634	248551	254896	249934
O00408	PDE2A	86665.7	27993.8	42086.1	21066.1	20588.7	13738.6
O00409	FOXN3	10049.4	40012	10156.4	5541.41	7636.15	4975.16
O00410	IPO5	2.6542e+06	2.64704e+06	2.50498e+06	3.221e+06	3.3251e+06	3.2022e+06
O00411	POLRMT	201711	192905	202865	223696	214055	225295
O00418	EEF2K	474109	468986	467272	437260	462246	394677
O00422	SAP18	1.55056e+06	1.50641e+06	1.54538e+06	1.42409e+06	1475174	1.43891e+06
O00423	EML1	82137	108545	90190.4	79245.7	88806.7	58241.3
O00425	IGF2BP3	3.10193e+06	3.10398e+06	2.96482e+06	2.64315e+06	2711314	2.64285e+06
O00429	DNM1L	1.13341e+06	1.16625e+06	1.15655e+06	1.40288e+06	1.43142e+06	1.34939e+06
O00442	RTCA	762689	777172	755123	742444	767342	780962
O00443	PIK3C2A	241777	230700	240751	200047	199314	195083
O00458	IFRD1	57825.5	56345.2	58484.2	43900.5	42947.6	36074.7
O00459	PIK3R2	44984.6	44926.1	44118.9	42117.3	50157.7	37289.9
O00461	GOLIM4	447275	446654	453271	405667	422500	418965
O00462	MANBA	398408	417666	414679	306137	290586	269605
O00468	AGRN	248041	262603	230566	279286	267797	250970
O00469	PLOD2	889185	925128	874745	527085	440809	495874
O00471	EXOC5	191750	194852	192547	182471	198285	189992
O00472	ELL2	48423.1	45369.3	46906.2	40284.5	42346.3	43414.3
O00479	HMGN4	226559	188467	234664	144776	148246	174800
O00483	NDUFA4	2.75203e+06	2.53092e+06	2.63965e+06	2.43508e+06	2.28292e+06	2.45261e+06
O00487	PSMD14	2.48928e+06	2.50349e+06	2.57548e+06	2.66656e+06	2679363	2.73668e+06
O00488	ZNF593	151443	161476	153469	214410	238810	215835
O00499	BIN1	70628.5	67260.5	67741.6	66765.7	73001.9	68196.1
O00505	KPNA3	875965	832435	833878	988377	938548	972516
O00506	STK25	500114	479610	523065	441277	458424	445940
O00507	USP9Y	55653.9	92837.6	55987.5	49206.8	68643.9	57599.5
O00515	LAD1	1.51167e+06	1.48983e+06	1.50425e+06	1.61407e+06	1.61635e+06	1.54008e+06
O00541	PES1	1.60802e+06	1.51743e+06	1.6055e+06	1.50266e+06	1.58555e+06	1.71311e+06
O00560	SDCBP	306063	305783	291873	300343	335535	299217
O00566	MPHOSPH10	779600	727822	802487	831511	786773	836042
O00567	NOP56	1.19945e+06	1.11152e+06	1.16969e+06	1.02533e+06	1.08893e+06	1.13054e+06
O00571	DDX3X	5.7377e+06	5.5472e+06	5.67098e+06	6.85188e+06	6.99855e+06	6.7404e+06
O00584	RNASET2	1.18542e+06	1.08517e+06	1.13303e+06	484011	457117	456557
O00622	CCN1	16892.2	21516.5	22198.9	8395.74	6731.03	18509.3
O00625	PIR	588704	554665	550900	659753	679740	639106
O00629	KPNA4	900639	937128	837792	1.01315e+06	1.05108e+06	1.01327e+06
O00635	TRIM38	119284	109969	103120	189454	215786	210892
O00743	PPP6C	500221	522170	447669	438990	468493	464649
O00748	CES2	1.06933e+06	991089	1.17662e+06	1.14084e+06	1.11374e+06	1.1614e+06
O00750	PIK3C2B	23912.5	13601.2	22604.5	7857.96	13787.9	23255.5
O00754	MAN2B1	524327	527337	549077	435727	426566	448497
O00762	UBE2C	1.18096e+06	1.20946e+06	1.03526e+06	1.60981e+06	1.79145e+06	1.4981e+06
O00763	ACACB	374539	344932	388760	457029	435203	458478
O00764	PDXK	1.26708e+06	1.18571e+06	1.1929e+06	1.20569e+06	1263246	1.19679e+06
O00767	SCD	496065	551137	582251	721448	555279	785440
O14493	CLDN4	135491	215350	128501	120109	137058	110597
O14495	PLPP3	119119	138489	115705	200638	211705	224320
O14497	ARID1A	207714	200110	201292	227530	240337	230077
O14519	CDK2AP1	465491	391839	358887	266947	327580	298663
O14521	SDHD	191054	267466	275165	235475	139222	178770
O14524	NEMP1	141275	123529	109044	76767.5	55685.8	116087
O14526	FCHO1	28019	27584.5	36533.5	20311.1	5141.12	24405.9
O14530	TXNDC9	375216	383049	392523	492951	564392	504993
O14545	TRAFD1	118503	132225	120618	164902	161367	159451
O14548	COX7A2L	429761	418025	438686	422257	376989	412046
O14561	NDUFAB1	1.89504e+06	1.79612e+06	1.8872e+06	2.05072e+06	2.09684e+06	2.05397e+06
O14562	UBFD1	1.50658e+06	1.47818e+06	1.48612e+06	1.6673e+06	1732142	1.47886e+06
O14569	CYB561D2	80754	76117	58988.4	62335.1	55517.3	72439.8
O14578	CIT	80538.3	89745.9	81425	94034.9	95446.1	89168.2
O14579	COPE	1.09457e+06	1.07824e+06	1.01025e+06	1.06305e+06	958012	975997
O14602	EIF1AY	1.39227e+06	1.35366e+06	1.29184e+06	1.27881e+06	1.28816e+06	1.2535e+06
O14613	CDC42EP2	66769.9	74005.7	82507.2	60019.8	58081.3	60290
O14617	AP3D1	392541	395940	375173	365668	390349	371577
O14618	CCS	826403	851396	791374	857558	907114	752149
O14638	ENPP3	29561.7	32837.8	29758.2	35407.9	36353.6	34258.1
O14639	ABLIM1	532926	518009	501181	465278	476913	473424
O14640	DVL1	124899	135449	125350	128344	149783	137000
O14641	DVL2	168588	177576	155256	154332	172121	155881
O14646	CHD1	196977	186773	184031	196970	204761	199493
O14647	CHD2	225877	195574	250253	181296	176005	206520
O14653	GOSR2	286357	254789	289752	303700	310398	336365
O14656	TOR1A	237707	212385	243043	250576	239567	259873
O14657	TOR1B	118515	111952	127448	129678	127334	136950
O14662	STX16	274097	292292	259074	235365	219393	246268
O14672	ADAM10	771233	754773	803639	715899	666332	773420
O14681	EI24	100061	98843.5	117579	86855.2	78584.2	98555.8
O14682	ENC1	76261.8	65718.4	70804	72044	73957.9	71302.1
O14686	KMT2D	59898.8	69802	69091.9	70905.4	76589.9	69367.3
O14715	RGPD8	1.72922e+06	1.63881e+06	1.65338e+06	1.62049e+06	1.63503e+06	1.65675e+06
O14727	APAF1	111764	127764	121265	77312.9	83581.3	74074.2
O14730	RIOK3	170351	210057	182914	343801	396979	333702
O14732	IMPA2	185238	194248	175544	201076	211741	181629
O14733	MAP2K7	738695	636274	848843	842565	868650	860038
O14734	ACOT8	380663	412197	423976	370037	366919	356164
O14735	CDIPT	432443	372005	536503	418283	407126	564156
O14737	PDCD5	1.48701e+06	1.44192e+06	1.44362e+06	1.87241e+06	1.89863e+06	1.70194e+06
O14744	PRMT5	4.75506e+06	4.58837e+06	4.62465e+06	5.50864e+06	5.6052e+06	5.64293e+06
O14745	SLC9A3R1	5.14223e+06	5.2521e+06	5.1173e+06	5.27198e+06	5335920	5.01626e+06
O14757	CHEK1	113124	115084	113061	170857	183093	174333
O14763	TNFRSF10B	148851	167059	144180	158881	149863	173906
O14772	FPGT	599994	685802	710926	645199	647519	504895
O14773	TPP1	1.23559e+06	1.27403e+06	1.31126e+06	854403	855482	832161
O14776	TCERG1	1.44129e+06	1.3627e+06	1.38077e+06	1.32061e+06	1.36757e+06	1.27471e+06
O14777	NDC80	348112	356542	320862	307761	343815	318179
O14787	TNPO2	573904	569907	518769	554020	537646	507149
O14791	APOL1	6811.28	13517.6	6266.88	50861.6	49188.6	46777.3
O14802	POLR3A	403210	390810	394074	377209	389057	395046
O14817	TSPAN4	125682	138831	120280	100757	93405.5	80517.3
O14818	PSMA7	3.40581e+06	3.4799e+06	3.37243e+06	3.78796e+06	3.9021e+06	3.76649e+06
O14827	RASGRF2	24605.1	19773	24069.6	23256	28622.1	21071.5
O14828	SCAMP3	578221	621707	581595	707242	704331	715929
O14832	PHYH	62411.4	72790.3	60033.9	59103.8	55899.2	63699.7
O14841	OPLAH	889323	876097	870475	844458	884933	811506
O14867	BACH1	36740	37945.1	32809.9	33744.7	28733.5	26381.1
O14874	BCKDK	299467	292568	276967	261517	279389	255810
O14879	IFIT3	70017	41732.8	37843.6	386856	385691	397521
O14880	MGST3	379451	384198	412516	333976	312610	317113
O14893	GEMIN2	433237	464257	372506	415767	368471	364758
O14894	TM4SF5	338751	396903	226451	305098	68797.3	69396.6
O14907	TAX1BP3	594882	636753	579586	724401	684678	647216
O14908	GIPC1	393360	415715	396702	347657	372950	343360
O14910	LIN7A	380342	371313	353563	301664	330453	286917
O14920	IKBKB	83123.8	87936.8	84654.7	78962.6	77678.5	65619.1
O14925	TIMM23	473585	536492	470096	474706	474231	486241
O14929	HAT1	1.22833e+06	1.13049e+06	1.13438e+06	1.16607e+06	1.15533e+06	1.18158e+06
O14933	UBE2L6	155542	236223	145347	791056	737925	703298
O14936	CASK	355418	328034	343005	298984	289371	293965
O14939	PLD2	150711	173079	192115	203732	175787	150095
O14949	UQCRQ	1.36945e+06	1.26333e+06	1.29529e+06	1.40588e+06	1.29342e+06	1.45856e+06
O14950	MYL12B	3.5595e+06	3.41703e+06	3.2665e+06	3.30434e+06	3.45966e+06	3.51854e+06
O14964	HGS	915214	890656	852375	978970	1.01777e+06	1.00008e+06
O14965	AURKA	1.10628e+06	1.1564e+06	991205	1.13767e+06	1.16685e+06	1.17424e+06
O14967	CLGN	127575	117874	165071	100859	92800.6	109657
O14974	PPP1R12A	530222	574620	522527	482538	489238	473175
O14975	SLC27A2	265847	254122	290935	230738	205954	277427
O14976	GAK	146259	162217	148870	152885	163843	147906
O14979	HNRNPDL	6.7649e+06	6.57652e+06	6.62979e+06	7.71173e+06	8330646	8.38156e+06
O14980	XPO1	1.09443e+06	1.07185e+06	1.08505e+06	1.09415e+06	1.17462e+06	1.13183e+06
O14981	BTAF1	340245	344645	352939	353520	358208	349374
O15014	ZNF609	56388.2	59888.1	43819.9	41041.2	40425.2	47399.8
O15020	SPTBN2	20379.1	15883.2	19293.9	16234.1	16787	12143.1
O15027	SEC16A	717428	731709	706800	594812	640917	580573
O15031	PLXNB2	692959	712280	683737	560717	537948	538006
O15037	KHNYN	268916	242820	280363	206746	233745	219331
O15040	TECPR2	27799	32980.1	29141.1	27431.5	39262.4	26177.6
O15042	U2SURP	1.22508e+06	1.24671e+06	1.17047e+06	1.19974e+06	1.29143e+06	1.25089e+06
O15047	SETD1A	239714	253838	232138	239894	240712	239341
O15050	TRANK1	316454	27588.4	67258.3	143063	203570	342550
O15056	SYNJ2	189720	198188	187733	167535	167176	169704
O15062	ZBTB5	11765.5	21358.7	9531.91	7667.24	18697.7	11787
O15066	KIF3B	139599	127995	142003	111734	118809	115428
O15067	PFAS	1.4492e+06	1.4273e+06	1.4308e+06	1.64846e+06	1738438	1.62889e+06
O15083	ERC2	128994	118916	133419	117261	136197	125223
O15084	ANKRD28	192851	197023	177603	186814	184366	176930
O15085	ARHGEF11	36663.7	35974.7	27191.7	28412.2	31596.4	27872
O15091	PRORP	464834	451832	449418	432824	457276	468107
O15111	CHUK	379031	436510	379344	363921	387546	348273
O15116	LSM1	526375	539757	491342	544520	531317	506498
O15118	NPC1	361030	325408	362428	261866	256244	289210
O15119	TBX3	125818	123577	116914	107219	115144	108621
O15120	AGPAT2	255097	263867	403078	197263	203103	253468
O15121	DEGS1	71270.1	62362.8	81255.2	76618.8	71510.2	76865.8
O15126	SCAMP1	255999	258119	240460	224265	243476	208209
O15127	SCAMP2	358186	405253	357591	419921	411464	394907
O15143	ARPC1B	1.57795e+06	1.48281e+06	1.51101e+06	1.58726e+06	1.61662e+06	1.62035e+06
O15144	ARPC2	1.65689e+06	1.59836e+06	1.67214e+06	1.83163e+06	2.00678e+06	1.83874e+06
O15145	ARPC3	1.99793e+06	1.97394e+06	1.92947e+06	1.96363e+06	2.32775e+06	1.98685e+06
O15155	BET1	151312	141702	159518	140324	149653	173984
O15160	POLR1C	1.18507e+06	1.13564e+06	1.19834e+06	1.33517e+06	1378884	1.28081e+06
O15162	PLSCR1	340312	943236	322422	1.82051e+06	1.79831e+06	1.60568e+06
O15164	TRIM24	521685	550405	488093	477242	503881	466603
O15169	AXIN1	80139.6	51595.2	64455.5	63026	55475.5	54702.2
O15173	PGRMC2	1.96544e+06	1.82798e+06	2.27041e+06	1.90581e+06	1619254	2.3804e+06
O15182	CETN3	130280	94443.3	122514	107643	120906	113057
O15194	CTDSPL	28164.3	42673.3	32654.5	32781.5	33590	12124.6
O15211	RGL2	24648.1	28323.4	24652.7	29127.5	32412.1	26887.3
O15212	PFDN6	980125	956470	1.00194e+06	1.17152e+06	1.1441e+06	1.16041e+06
O15213	WDR46	412533	411189	409187	459990	449195	511871
O15226	NKRF	217896	214854	232797	231403	225432	236475
O15228	GNPAT	73390.3	74880	69262.9	84858.4	81623.8	88898.6
O15230	LAMA5	542727	564006	508112	781215	704209	735790
O15231	ZNF185	15429.8	13870.1	14451.8	17028.4	18643	14727.4
O15234	CASC3	60486	66463.9	67002.5	82815.1	89187.1	80796
O15235	MRPS12	688502	608255	654476	576022	548661	691114
O15239	NDUFA1	187902	145268	192579	124837	146259	102566
O15243	LEPROT	67838.4	88062.5	70169.3	85556.7	60275.7	76788
O15254	ACOX3	380972	345063	373429	334432	379751	365431
O15258	RER1	802852	778678	886051	758333	714534	761374
O15260	SURF4	2.29562e+06	2.32031e+06	2.6552e+06	2.24479e+06	2.1513e+06	2.78124e+06
O15264	MAPK13	192392	190834	210661	245233	237847	215593
O15269	SPTLC1	598666	578682	599050	580443	538194	624408
O15270	SPTLC2	254521	269776	271374	303776	287479	316697
O15287	FANCG	22711.6	23580.3	22177.4	27078.9	25912.1	27030.3
O15294	OGT	221201	225507	235005	303202	303159	300956
O15304	SIVA1	55607.5	58952.4	44302.4	84161.2	60521.7	86953.8
O15305	PMM2	1.5582e+06	1.58778e+06	1.60999e+06	1.62452e+06	1.70291e+06	1.59364e+06
O15318	POLR3G	88766.3	77871.5	84878.7	102991	102106	93474.1
O15321	TM9SF1	693293	716822	774296	671331	718794	734815
O15347	HMGB3	1.80686e+06	1.58186e+06	1.71381e+06	1.42861e+06	1506193	1.58246e+06
O15355	PPM1G	1.83322e+06	1.88568e+06	1.86492e+06	1.83505e+06	1.74933e+06	1.86952e+06
O15357	INPPL1	105003	110118	89069.7	88033.1	93058.4	80325.8
O15371	EIF3D	1.95984e+06	1.8033e+06	1.80587e+06	1.84962e+06	1.9949e+06	1.96189e+06
O15372	EIF3H	2.03153e+06	1.96395e+06	2.04262e+06	2.21275e+06	2.27342e+06	2.17635e+06
O15379	HDAC3	145841	167323	135796	129894	126975	118316
O15381	NVL	171316	164046	171604	173567	191964	189866
O15392	BIRC5	84073.3	75674.7	81829.5	70149.9	81161	68959.1
O15397	IPO8	221429	229090	223115	220748	223257	230396
O15400	STX7	1.0838e+06	1.13211e+06	1.05684e+06	829531	969717	862635
O15417	TNRC18	189771	181207	187550	174020	168604	189349
O15427	SLC16A3	3.02011e+06	3.05738e+06	3.41027e+06	3.03649e+06	2.87602e+06	3.05099e+06
O15431	SLC31A1	69514.5	92481.3	70510.6	74627.9	62911.9	95164.7
O15438	ABCC3	209544	231245	216482	200073	233696	253158
O15439	ABCC4	100689	104301	107909	102670	93142.4	106987
O15440	ABCC5	95442.4	84392.1	122745	87088.9	88287.6	87212.9
O15446	POLR1G	476233	467322	511854	483258	514249	524401
O15460	P4HA2	892541	901497	867598	574768	529119	555896
O15498	YKT6	365616	387452	404430	418160	402992	417638
O15504	NUP42	91124.5	98227.6	92464.2	108826	125708	98210
O15511	ARPC5	2.02829e+06	2.01923e+06	1.99784e+06	2.26684e+06	2.19428e+06	2.26706e+06
O15514	POLR2D	117140	133785	117547	117224	152562	87452.3
O15523	DDX3Y	786260	663354	715366	714749	745644	691975
O15525	MAFG	67464.6	67466.1	76044.7	64031.1	66499.9	65394.6
O15530	PDPK1	106473	109260	116755	109327	116365	104421
O15533	TAPBP	594995	618852	527769	855357	745376	874802
O15541	RNF113A	179646	191724	185221	169803	178553	154662
O15550	KDM6A	52915.3	43815.9	47941	44870.8	40995.1	41662.2
O43143	DHX15	2.2995e+06	2.29124e+06	2.33111e+06	2.26612e+06	2296080	2.36216e+06
O43148	RNMT	657733	679935	649703	484630	511713	498824
O43149	ZZEF1	68385.4	65088.5	63686.5	78236.3	86892.1	77816
O43150	ASAP2	39634.7	41392.8	34775.7	33468.3	32442.2	34543.1
O43156	TTI1	285050	255647	271776	308090	329561	297163
O43157	PLXNB1	60428.2	68396.8	59118.7	47388.3	49136.4	50766.2
O43159	RRP8	184857	178687	179828	193876	192964	198426
O43164	PJA2	58614.2	70083	45330.2	31802	31794.2	27904.1
O43169	CYB5B	4.7152e+06	4.13542e+06	5.3186e+06	4.50646e+06	4214392	5.11072e+06
O43172	PRPF4	739447	661997	728609	743153	769167	727854
O43175	PHGDH	6.75539e+06	6.62342e+06	6.3584e+06	5.36519e+06	5.49416e+06	5.14378e+06
O43181	NDUFS4	483925	489856	528766	427511	514875	444737
O43187	IRAK2	11236.1	12579.5	10027	24438.9	28913.5	27486.8
O43237	DYNC1LI2	629230	646370	649847	656400	733875	675109
O43242	PSMD3	1.2667e+06	1.22374e+06	1.23384e+06	1.3108e+06	1.35891e+06	1.38116e+06
O43251	RBFOX2	232853	261972	267354	211073	253678	240655
O43252	PAPSS1	1.31712e+06	1.34644e+06	1.33613e+06	1.27965e+06	1.2591e+06	1.25468e+06
O43255	SIAH2	14044	8765.35	18413.3	13905.5	15750.1	12181.8
O43257	ZNHIT1	21931.5	12328.5	14511.4	10364.2	31821.9	22978.3
O43264	ZW10	610174	608800	595889	667660	693194	674573
O43278	SPINT1	73256.7	81885.6	70155.8	29438.4	36113.5	28839.2
O43286	B4GALT5	107062	121649	92811.7	180697	187617	150874
O43290	SART1	534002	508381	528197	476485	492640	540197
O43292	GPAA1	447948	369721	438144	298514	283785	378233
O43293	DAPK3	352110	337913	327490	282724	282432	279417
O43299	AP5Z1	48612.2	41439.2	53490.2	55339.7	65300.4	65907.5
O43301	HSPA12A	102739	95091.6	89332.7	85825.3	98845.6	86592.7
O43303	CCP110	6969.68	4606.6	6463.43	4271.36	4270.9	4724.45
O43306	ADCY6	17001	4663.6	21462.7	21599.4	20047.1	30281.4
O43310	CTIF	88641.4	92601.7	84317.4	71289.9	74379.4	65718
O43312	MTSS1	109160	131563	104617	110459	125026	125258
O43314	PPIP5K2	86583.3	83231.6	89821.5	77863.9	88825.3	79045.6
O43318	MAP3K7	76552.4	69162.1	72744	87262.3	94530.2	85554.5
O43324	EEF1E1	3.08528e+06	3.05284e+06	2.84637e+06	2.88995e+06	3046883	2.82734e+06
O43325	LYRM1	90374.5	177021	87417.4	53987	63689.3	38232.3
O43347	MSI1	751161	662663	761091	637424	646716	636906
O43353	RIPK2	84301.2	74293.2	90888	117144	121132	114848
O43379	WDR62	80928.1	83696	79992.8	79074.7	87962	78567.2
O43390	HNRNPR	5.53334e+06	4.97342e+06	5.96947e+06	5.57544e+06	5078173	6.17091e+06
O43395	PRPF3	462183	399367	542449	450178	389716	529562
O43396	TXNL1	2.08119e+06	2.1288e+06	1.98003e+06	2.35806e+06	2.44398e+06	2.34121e+06
O43399	TPD52L2	3.74003e+06	3.62332e+06	3.7384e+06	4.06243e+06	3.8872e+06	3.90497e+06
O43402	EMC8	419345	404438	435984	377037	382580	380356
O43414	ERI3	206061	202981	194776	199311	214513	183188
O43422	THAP12	67454.6	76343.1	67870.6	67341.6	67246.7	66672.6
O43427	FIBP	156726	144537	160876	151804	158832	149446
O43432	EIF4G3	942468	943825	924169	869007	916785	875458
O43447	PPIH	637824	566820	581409	687734	722358	690904
O43462	MBTPS2	46285.9	49345	51254.4	32875.4	24170	48713.7
O43464	HTRA2	1.10988e+06	1.08854e+06	1.05621e+06	883825	845176	958545
O43482	OIP5	99968.5	75551.2	80200.7	96358.4	100522	89288
O43488	AKR7A2	1.88501e+06	1.95794e+06	1.87021e+06	1.82093e+06	1.94862e+06	1.8431e+06
O43491	EPB41L2	1.27006e+06	1.2595e+06	1.23932e+06	1.14877e+06	1.20796e+06	1.17477e+06
O43493	TGOLN2	1.35993e+06	1.35009e+06	1.27697e+06	1.23356e+06	1.18433e+06	1.28982e+06
O43502	RAD51C	164445	166645	151811	195770	200912	214370
O43504	LAMTOR5	307072	347266	329476	375679	367498	368031
O43505	B4GAT1	476982	502084	524805	504327	481616	554651
O43542	XRCC3	53410.3	54683.9	51895.9	58889.8	44025.3	55912.4
O43567	RNF13	122414	152697	102988	95227.8	97997.7	79126.7
O43572	AKAP10	66175.1	85832.8	78043.1	83694.2	84833	77459.5
O43583	DENR	994266	1.04564e+06	970941	811065	888421	789734
O43592	XPOT	406249	421634	415745	430342	425796	411824
O43598	DNPH1	772680	773501	780818	807693	846350	752534
O43609	SPRY1	44079.6	38766.1	40995.2	32094	31223.2	35515.6
O43615	TIMM44	1.12524e+06	1.18714e+06	1.16754e+06	1.17783e+06	1.17462e+06	1.19413e+06
O43617	TRAPPC3	1.13247e+06	1.06472e+06	930785	1.09891e+06	1.1253e+06	1.07508e+06
O43633	CHMP2A	222082	217527	225367	236110	223891	190406
O43639	NCK2	66009.8	68595.3	81378.2	84092.8	86181.7	78928.3
O43657	TSPAN6	397586	389927	373367	526024	492076	490371
O43660	PLRG1	667899	650337	634153	591300	616295	609336
O43663	PRC1	434891	471630	403627	380736	384383	372651
O43665	RGS10	135482	134573	197366	243979	225332	215182
O43670	ZNF207	1.70567e+06	1.76838e+06	1.80754e+06	2.20182e+06	2.24582e+06	2.20724e+06
O43674	NDUFB5	631306	596704	619321	590072	558244	643618
O43676	NDUFB3	595839	564444	606188	602609	546843	552265
O43678	NDUFA2	856202	776650	832427	742304	739786	764906
O43681	GET3	1.48124e+06	1.45034e+06	1.42753e+06	1.58086e+06	1.73289e+06	1.69618e+06
O43683	BUB1	76484.2	86923.1	80435.4	108456	112268	112465
O43684	BUB3	3.61085e+06	3.65161e+06	3.57531e+06	4.11124e+06	4228207	4.18255e+06
O43707	ACTN4	4.02451e+06	3.83783e+06	3.95401e+06	4.00254e+06	4156026	4.11432e+06
O43708	GSTZ1	158308	133786	156432	153939	180355	154339
O43709	BUD23	257032	255627	245467	270001	286814	286850
O43715	TRIAP1	428791	449092	412401	353573	344791	343902
O43716	GATC	238255	240350	211517	226601	259831	235724
O43719	HTATSF1	553148	541327	550278	568069	573675	580344
O43731	KDELR3	91959	113967	95924.5	5448.42	58153.6	80968.1
O43741	PRKAB2	109865	101024	110155	119681	111773	113190
O43747	AP1G1	896553	914192	919272	928274	963549	878631
O43752	STX6	244939	247393	269928	233149	248407	226272
O43760	SYNGR2	1.06276e+06	1.3066e+06	996666	1.04304e+06	1.05427e+06	999939
O43761	SYNGR3	105237	8144.21	111714	72741.7	8489.96	18019.1
O43765	SGTA	1.39556e+06	1.47812e+06	1.38685e+06	1.5484e+06	1.63049e+06	1.56173e+06
O43766	LIAS	92045.1	104710	81888.7	74776	79750.6	78348.4
O43768	ENSA	617282	587200	637248	636028	675929	602389
O43772	SLC25A20	396925	371216	405822	374867	326141	379941
O43776	NARS1	3.06779e+06	3.14897e+06	3.00085e+06	2.7315e+06	2771213	2.64392e+06
O43795	MYO1B	644017	631195	616488	689944	698661	703198
O43805	SSNA1	36009.8	47073.5	38328.1	74307.7	95955.1	75066
O43808	SLC25A17	49639.1	52929	63707.5	54283.7	54674.1	52042.7
O43809	NUDT21	1.91969e+06	1.86832e+06	1.99233e+06	1.96564e+06	2.01886e+06	2.04218e+06
O43813	LANCL1	1.05383e+06	1.07381e+06	998833	1.07033e+06	1.10738e+06	971971
O43815	STRN	199079	189701	195357	220093	223991	202611
O43818	RRP9	1.42776e+06	1.20895e+06	1.43245e+06	1.32842e+06	1.35159e+06	1.46578e+06
O43819	SCO2	453340	492657	496831	542024	547563	562748
O43823	AKAP8	328485	322242	328210	336011	344030	337583
O43824	GTPBP6	86567	96062.4	103479	95836.2	91673.4	108875
O43826	SLC37A4	154067	163119	189561	157806	136340	164324
O43837	IDH3B	951508	916773	923754	819896	852654	876512
O43847	NRDC	610732	611652	620712	722124	747043	721022
O43852	CALU	2.3782e+06	2.18142e+06	2.35898e+06	2.2061e+06	2099017	2.13794e+06
O43861	ATP9B	31061.9	34956.8	34875	30700.9	40007.7	28936.5
O43865	AHCYL1	611202	617126	575238	624895	637267	630676
O43896	KIF1C	284218	285401	292560	281473	301305	267575
O43903	GAS2	178147	153933	159577	189631	164716	164283
O43913	ORC5	263861	241758	250000	288863	289649	295858
O43920	NDUFS5	1.07231e+06	1.00253e+06	1.10549e+06	987237	949701	1.00138e+06
O43924	PDE6D	143032	157281	147865	115626	129548	131850
O43929	ORC4	231977	219652	216964	235269	243112	218732
O43933	PEX1	92223.7	91125.6	101097	96051	99588.9	95074.4
O60216	RAD21	655207	625688	643719	567262	618726	589064
O60218	AKR1B10	6.4067e+06	6.34881e+06	6.58547e+06	7.45441e+06	7.5571e+06	6.95247e+06
O60220	TIMM8A	1.15051e+06	1.26117e+06	1.18676e+06	1.15625e+06	1.16844e+06	1.10222e+06
O60229	KALRN	23912	26155.5	20642.5	20845.6	23209.3	26100
O60231	DHX16	274319	263962	280493	297066	312344	285167
O60232	ZNRD2	514999	520119	484368	571864	568435	570078
O60234	GMFG	452369	458418	453503	444856	406667	391704
O60238	BNIP3L	36155.1	30093.4	37556.8	8759.53	12006.2	9986.88
O60243	HS6ST1	49068.8	33607.1	47060	31149.2	24165.7	27594.8
O60244	MED14	196149	200990	196147	200975	201595	189908
O60256	PRPSAP2	390577	388066	368252	387057	395628	384129
O60262	GNG7	52044.3	45133.9	41748.1	17324.9	20231.6	17142.6
O60264	SMARCA5	1.22498e+06	1.15488e+06	1.30527e+06	1.3665e+06	1.33082e+06	1.52826e+06
O60271	SPAG9	710790	745751	710872	691248	692164	655209
O60287	URB1	366876	376416	390151	423601	409881	433962
O60291	MGRN1	124992	139147	127241	123912	116056	130413
O60293	ZFC3H1	78492.1	66867.5	77039.9	55250.8	61006.1	61828.3
O60294	LCMT2	62880.4	74464.4	76457.1	77088.3	85124.4	86051.9
O60299	LZTS3	25044.9	28463	21675.7	9053.47	20550.2	8884.93
O60306	AQR	759704	751910	769126	713889	739496	737193
O60313	OPA1	432914	421186	420853	386071	381970	385245
O60318	MCM3AP	123597	104485	115551	120155	112020	107249
O60333	KIF1B	205274	213538	213355	226954	220747	208510
O60336	MAPKBP1	117615	73347.5	110342	96032.8	96829.4	94514.8
O60337	MARCHF6	61655.2	40624.4	51041.9	36600.9	49783.4	44502.7
O60341	KDM1A	648861	688405	626865	613797	638312	589499
O60343	TBC1D4	394411	399877	380843	347426	368737	347257
O60346	PHLPP1	73300.6	79534.6	76100.4	103561	107622	78780.6
O60353	FZD6	31847.2	18197.7	20628.5	12868.9	27208.5	11376.9
O60361	NME2P1	286573	192055	356720	446870	431545	360015
O60427	FADS1	235207	245982	283743	287521	242587	342699
O60437	PPL	1.07488e+06	985126	908434	580605	641290	528035
O60443	GSDME	485236	479986	467516	402778	418422	385222
O60447	EVI5	57759.7	39296.6	21097.3	23857.7	8284.09	26567.9
O60476	MAN1A2	65426.2	60039.1	58544.4	59311.5	60476.4	58547.9
O60487	MPZL2	127284	111799	119190	144709	154557	111244
O60488	ACSL4	2.09785e+06	1.96298e+06	1.87528e+06	1.53373e+06	1506180	1.62802e+06
O60493	SNX3	1.0198e+06	1.02109e+06	1.02842e+06	1.26408e+06	1.29833e+06	1.23815e+06
O60499	STX10	157613	141551	160967	138821	147217	116858
O60502	OGA	906659	828371	910840	940515	935150	939458
O60503	ADCY9	71503.4	72995.3	76161.6	64157	55258.1	73857.9
O60504	SORBS3	325931	332783	326421	343929	368102	354713
O60506	SYNCRIP	2.97052e+06	2.73434e+06	3.02785e+06	3.1214e+06	3.05965e+06	3.30725e+06
O60507	TPST1	29401.5	27112.1	30791.4	27063.9	25718.5	26311
O60508	CDC40	368853	371799	339679	365084	377307	373609
O60512	B4GALT3	18177.8	14792.5	14475.2	11910.5	946.982	5656.77
O60513	B4GALT4	85030.2	65917.2	79197.6	85096.6	86261.6	60065.3
O60518	RANBP6	256132	250973	256047	292091	291033	305193
O60524	NEMF	320047	328433	357861	348684	386811	413988
O60547	GMDS	1.52465e+06	1.52338e+06	1.4501e+06	1.67352e+06	1.61956e+06	1.63503e+06
O60551	NMT2	79142.9	89722.9	76681	83249.1	80515.3	78753.8
O60563	CCNT1	264292	266575	264940	271778	286671	253348
O60566	BUB1B	513477	515828	512014	525962	549767	481622
O60568	PLOD3	954264	962152	927297	1.07525e+06	1071711	1.06704e+06
O60573	EIF4E2	388132	367069	409254	407207	427640	402169
O60583	CCNT2	77342	77904.9	74860.4	63045.7	76032.3	70524.1
O60610	DIAPH1	282604	293300	278807	380180	394636	358359
O60613	SELENOF	322247	285031	263667	229776	227044	249181
O60637	TSPAN3	211974	268721	187881	257646	283193	303546
O60645	EXOC3	191598	211223	183610	180215	198865	195572
O60658	PDE8A	23497.2	22022.2	20787.2	14209.2	18951.9	19964.9
O60664	PLIN3	2.75025e+06	2.78436e+06	2.72834e+06	2.57802e+06	2.6591e+06	2.38162e+06
O60671	RAD1	133739	131765	123280	163462	157867	173002
O60675	MAFK	84194	98969	74649.8	64001.7	76615.3	66240.8
O60678	PRMT3	234266	239250	227843	262984	289649	260212
O60683	PEX10	18900.9	16994.9	20469.6	18350.7	11454.6	14780.3
O60684	KPNA6	1.65824e+06	1.66719e+06	1.61302e+06	1.5826e+06	1.57637e+06	1.63454e+06
O60701	UGDH	1.91108e+07	1.87009e+07	1.80043e+07	1.99736e+07	19774018	1.99154e+07
O60716	CTNND1	1.11965e+06	1.11883e+06	1.09554e+06	1.09834e+06	1.10859e+06	1.08042e+06
O60725	ICMT	241912	204446	288192	218708	201638	311005
O60739	EIF1B	1.51589e+06	1.41048e+06	1.40293e+06	1.88444e+06	1.98174e+06	1.81017e+06
O60749	SNX2	1.07345e+06	1.08922e+06	1.04338e+06	1.00956e+06	1.1153e+06	995665
O60762	DPM1	1.21435e+06	1.11071e+06	1.21721e+06	1.27918e+06	1.1853e+06	1.32985e+06
O60763	USO1	1.7377e+06	1.75718e+06	1.67245e+06	1.59176e+06	1.61993e+06	1.55138e+06
O60779	SLC19A2	49059.3	35907.7	44759.8	69295.2	60006.8	60445.9
O60783	MRPS14	315800	248467	318451	235196	254510	236078
O60784	TOM1	383800	399827	367074	404563	451440	411637
O60825	PFKFB2	339758	316595	284885	332457	340654	282000
O60826	CCDC22	315559	339854	329534	379771	407454	356231
O60828	PQBP1	1.11229e+06	1.14176e+06	1.11107e+06	1.11835e+06	1.17788e+06	1.10257e+06
O60830	TIMM17B	654907	430282	784122	451769	198390	436130
O60832	DKC1	1.22376e+06	1.15563e+06	1.16709e+06	1.10439e+06	1.17125e+06	1.18769e+06
O60841	EIF5B	1.38899e+06	1.34302e+06	1.3467e+06	1.5116e+06	1568343	1.55397e+06
O60869	EDF1	2.0169e+06	2.03116e+06	2.09825e+06	2.32874e+06	2119701	2.10051e+06
O60870	KIN	575170	587874	613683	594535	594706	614372
O60879	DIAPH2	137342	88610.6	115039	124366	178164	146807
O60884	DNAJA2	2.70151e+06	2.69918e+06	2.80185e+06	3.01608e+06	3.08613e+06	2.9994e+06
O60885	BRD4	687919	678625	644929	553088	559260	531255
O60888	CUTA	1.29076e+06	1.3399e+06	1.08672e+06	1.25712e+06	1297770	1.29681e+06
O60907	TBL1X	718120	788093	730663	809587	794117	788383
O60921	HUS1	68345.7	75912.5	69633.1	73542.7	75022.2	76814.8
O60925	PFDN1	1.34319e+06	1.30057e+06	1.3695e+06	1.61022e+06	1571436	1.61154e+06
O60927	PPP1R11	116294	148922	112289	119990	132572	103978
O60930	RNASEH1	180299	182369	175567	146020	175096	168033
O60934	NBN	1.05038e+06	1.10497e+06	1.06831e+06	1.36487e+06	1.45122e+06	1.36572e+06
O60936	NOL3	53492.8	83111.8	38483.1	54159.7	33840.6	41411.8
O60941	DTNB	118481	141869	120527	108252	111986	114686
O60942	RNGTT	266638	262243	274235	257127	276682	251137
O75027	ABCB7	271072	250391	292170	286743	238728	294018
O75044	SRGAP2	81357.8	88463.7	80480.4	81303.2	81520	81016
O75051	PLXNA2	11450.3	15678.5	12352.6	11614.7	10584.3	13511.9
O75052	NOS1AP	90724	80055.7	89710.2	66783.5	65107.2	66083
O75063	FAM20B	67977.6	80328.7	69503.4	57935.2	61581.9	68239.8
O75083	WDR1	3.89868e+06	3.91237e+06	3.80543e+06	3.96404e+06	4054954	3.73775e+06
O75110	ATP9A	39814.3	44641	49786.5	55573.4	52691.4	55453.9
O75113	N4BP1	112827	128106	116389	140804	146655	136882
O75116	ROCK2	1.60367e+06	1.62873e+06	1.55284e+06	1.6532e+06	1.69465e+06	1.63523e+06
O75122	CLASP2	233893	249453	247384	243022	264928	242533
O75127	PTCD1	269976	259863	275304	332578	324297	353632
O75131	CPNE3	2.19137e+06	2.21526e+06	2.24886e+06	2.69772e+06	2626170	2.50578e+06
O75143	ATG13	105131	100521	93040	85535.6	77400.8	82775.4
O75145	PPFIA3	60554.5	128784	136480	134448	156921	131585
O75146	HIP1R	458929	477202	441222	438821	467622	433887
O75147	OBSL1	206683	207053	205795	247788	227908	237932
O75150	RNF40	294713	311697	291379	354550	387909	349464
O75152	ZC3H11A	390874	368936	422309	415071	361770	441856
O75153	CLUH	1.34474e+06	1.26929e+06	1.34526e+06	1.67354e+06	1.71937e+06	1.65874e+06
O75154	RAB11FIP3	88786.3	71434.6	93706.4	76478.7	83042.2	70796.5
O75157	TSC22D2	94422.7	95643.5	86567.4	81626.5	97239.8	75632.1
O75161	NPHP4	24118.9	31552.9	17940.1	8097.5	25740.3	19025.1
O75164	KDM4A	93995	95205.5	97337.6	162353	160057	154287
O75165	DNAJC13	218207	208554	207243	236507	242135	234234
O75167	PHACTR2	28643.6	24368.8	29486.3	29854.4	32755.7	32361.2
O75170	PPP6R2	2.89239e+06	2.79518e+06	2.68358e+06	2.46969e+06	2480513	2.40414e+06
O75175	CNOT3	340973	374534	326892	304737	321077	288478
O75177	SS18L1	34030.5	36255.6	30088.8	19759.9	20594.7	19615.6
O75179	ANKRD17	369102	391230	377527	408518	441440	403474
O75190	DNAJB6	152289	129633	175590	164361	173447	170858
O75191	XYLB	364285	383519	373324	375679	428704	376166
O75197	LRP5	61968.1	37018.9	41057.7	70323.7	57485.2	49438.1
O75204	TMEM127	25649.8	28340.9	20521.2	44554.1	33166.5	34672.6
O75208	COQ9	497980	506139	482179	391645	432226	386871
O75223	GGCT	1.14977e+06	1.26152e+06	1.07559e+06	983637	1019294	1.02417e+06
O75251	NDUFS7	1.28628e+06	1.27744e+06	1.09807e+06	959615	958001	929590
O75264	SMIM24	27119.7	27115.9	27859.3	37172.1	43747.3	34250.7
O75306	NDUFS2	1.92547e+06	1.98591e+06	1.94508e+06	1.91886e+06	1.81149e+06	1.89219e+06
O75312	ZPR1	527395	540021	567045	658427	673217	627342
O75317	USP12	21189.9	16218.6	16781.2	12623	12924.1	11196
O75319	DUSP11	112121	108213	105754	145340	134927	137895
O75323	NIPSNAP2	462098	489232	478483	457544	395511	469177
O75326	SEMA7A	67764	72523.1	65602	108921	97943.5	96765.7
O75330	HMMR	248541	291916	232259	251144	255359	257867
O75340	PDCD6	1.28077e+06	1.3804e+06	1.23685e+06	1.26144e+06	1.33583e+06	1.15605e+06
O75343	GUCY1B2	73001.3	26631.6	76929.7	71532	75303.8	80826
O75347	TBCA	3.084e+06	2.87406e+06	3.10374e+06	3.24561e+06	3.33543e+06	3.02688e+06
O75348	ATP6V1G1	1.54383e+06	1.46215e+06	1.56453e+06	1.60635e+06	1.6646e+06	1.68214e+06
O75351	VPS4B	679091	721742	668660	761856	814606	750320
O75352	MPDU1	719149	724799	816378	790516	732823	1.01391e+06
O75354	ENTPD6	170315	185928	174114	221184	213354	226677
O75356	ENTPD5	272170	283745	258717	338968	381637	367665
O75362	ZNF217	87863.2	70985.1	81083.5	87286.5	84290.3	79393.7
O75363	BCAS1	42203.1	41060.8	37458.5	28056.8	30167	25747.8
O75367	MACROH2A1	2.53672e+06	2.49488e+06	2.47273e+06	2.56076e+06	2.37927e+06	2.68012e+06
O75368	SH3BGRL	550178	582613	561114	593890	592499	564545
O75369	FLNB	4.09911e+06	3.99669e+06	3.94836e+06	3.91574e+06	4.01095e+06	3.84988e+06
O75376	NCOR1	166911	162928	163234	181192	179045	176496
O75380	NDUFS6	634311	672383	622865	647068	642716	636053
O75381	PEX14	550534	564670	542588	448254	431495	436368
O75382	TRIM3	24029.2	33682.5	26299.2	21147.2	26731.7	26529.4
O75387	SLC43A1	148359	140822	149781	140049	121512	130944
O75390	CS	6.14268e+06	6.23383e+06	6.09384e+06	6.32192e+06	6.41429e+06	6.88794e+06
O75391	SPAG7	366494	360911	363671	420355	501108	447861
O75394	MRPL33	263485	251548	233403	186783	215443	195640
O75396	SEC22B	1.22991e+06	1.17911e+06	1.33337e+06	1.02891e+06	953677	1.19384e+06
O75400	PRPF40A	932558	906576	879617	861797	913008	865994
O75410	TACC1	545162	515403	516026	493187	511845	498722
O75414	NME6	272807	296813	268217	228404	289749	242940
O75419	CDC45	106929	120330	101377	118446	119812	120262
O75420	GIGYF1	26194.2	70392.8	32608.5	25276.3	157864	168482
O75427	LRCH4	151134	169078	137822	122925	138706	153305
O75431	MTX2	457228	462489	421259	411072	454990	451722
O75436	VPS26A	2.46554e+06	2.41465e+06	2.48961e+06	2.52268e+06	2.64115e+06	2.55825e+06
O75438	NDUFB1	801545	856567	804910	766741	721356	830381
O75439	PMPCB	1.62102e+06	1.59074e+06	1.60821e+06	1.68013e+06	1.64093e+06	1.70084e+06
O75443	TECTA	154280	148750	131237	152190	163755	125920
O75446	SAP30	27684.8	27728.9	25603.8	35919.7	34702.3	31983.4
O75448	MED24	108063	94337.6	103997	92284.5	98442.5	93217.8
O75449	KATNA1	254556	257045	248270	236894	255938	238801
O75461	E2F6	50424.4	68554.6	36155	30526.2	32844.6	41155.1
O75462	CRLF1	128895	132005	103754	91516	82161.1	95131
O75473	LGR5	37902.6	18443.8	45059.5	30259	35056.6	30463.7
O75475	PSIP1	591743	536397	683578	521589	521331	595813
O75477	ERLIN1	957476	904373	1.10299e+06	1.03045e+06	890257	1.2196e+06
O75489	NDUFS3	2.10595e+06	2.14719e+06	2.12197e+06	1.96116e+06	2.06169e+06	2.02977e+06
O75494	SRSF10	2.21769e+06	2.21422e+06	2.35855e+06	2.44629e+06	2.65102e+06	2.37381e+06
O75496	GMNN	357584	363045	343338	411003	422313	379473
O75503	CLN5	161248	165861	162744	82115.9	104642	98530.3
O75506	HSBP1	607652	649588	601908	603571	613885	579655
O75509	TNFRSF21	201952	263937	208155	277210	277516	307659
O75521	ECI2	1.41149e+06	1.36837e+06	1.29832e+06	1.32919e+06	1.27454e+06	1.33122e+06
O75525	KHDRBS3	194928	155004	182291	196618	199698	209386
O75528	TADA3	64405.7	54068.4	67255.4	66475.5	61857.7	54144.1
O75529	TAF5L	140253	163541	148378	137714	148853	137778
O75530	EED	537085	538097	521591	542483	607170	545065
O75531	BANF1	2.9799e+06	2.76063e+06	2.70896e+06	3.21549e+06	3.41746e+06	3.34738e+06
O75533	SF3B1	2.66572e+06	2.61019e+06	2.56502e+06	2.52369e+06	2580210	2.51023e+06
O75534	CSDE1	1.07397e+06	1.02937e+06	1.07116e+06	1.45538e+06	1.49444e+06	1.49931e+06
O75554	WBP4	244245	275334	245196	248728	255162	236833
O75569	PRKRA	678242	688689	693590	720626	679682	684034
O75570	MTRF1	80105.9	87284.3	78146	66525.2	58114.2	79308.5
O75575	CRCP	127014	118111	127724	124152	139026	117565
O75586	MED6	99243.7	101350	107916	128710	113412	129764
O75592	MYCBP2	63291.5	60723	56816	60561.6	59898.3	60915.8
O75600	GCAT	138591	135333	127838	158319	146207	146589
O75607	NPM3	1.49335e+06	1.16755e+06	1.27915e+06	1.45078e+06	1.5478e+06	1.30795e+06
O75608	LYPLA1	2.03535e+06	1.65986e+06	1.72971e+06	1.61794e+06	1.62799e+06	1.63145e+06
O75616	ERAL1	366017	377789	383822	441166	476729	496548
O75629	CREG1	142558	143096	135991	119442	93989.7	105558
O75635	SERPINB7	283595	314678	282768	208109	295227	204379
O75643	SNRNP200	2.08129e+06	1.98442e+06	2.04297e+06	2.03673e+06	2.06696e+06	2.10724e+06
O75648	TRMU	120170	108100	125748	112975	124199	128042
O75663	TIPRL	246130	236048	236233	243385	253730	223295
O75665	OFD1	68608.7	65120.3	74414.7	95720.4	96119.8	92977.7
O75674	TOM1L1	181773	171537	170920	152356	165063	148792
O75676	RPS6KA4	64546.3	58245.5	71456.9	66875.7	71684.6	62710.7
O75683	SURF6	360447	394001	375464	432821	441831	431559
O75688	PPM1B	287130	287557	283734	271141	276053	265306
O75689	ADAP1	76881.6	78196.7	65955.1	56781.4	58881.3	49098.5
O75691	UTP20	321517	289779	368173	358001	359705	434232
O75694	NUP155	589629	581466	565019	510090	552174	548932
O75695	RP2	296951	308757	297722	281383	273656	275338
O75716	STK16	34401	36281.6	26761.3	15979.4	19762.5	19958.9
O75717	WDHD1	293935	301943	274495	320814	334599	305996
O75718	CRTAP	402233	423535	407943	447157	486093	465501
O75746	SLC25A12	113676	110280	125277	116035	95146	128068
O75764	TCEA3	722850	681112	680427	836815	834127	845827
O75771	RAD51D	5064.71	15849	51208.9	8948.55	20346.8	7183.51
O75781	PALM	121092	126213	104634	51700.5	53397.5	62871.8
O75787	ATP6AP2	234185	203934	274008	202929	183296	238330
O75792	RNASEH2A	323040	315345	310096	319048	312787	324883
O75794	CDC123	558650	560159	544342	712083	725095	691044
O75795	UGT2B17	63879.5	147665	226919	160726	149310	210320
O75808	CAPN15	59482.1	90313.8	68225.3	74642.7	75299.2	63375.9
O75817	POP7	334599	261848	304531	325678	328566	337994
O75818	RPP40	198693	219103	185077	252356	255093	240769
O75820	ZNF189	29022.2	21867.8	41765.9	50262.5	35379.1	51275.4
O75821	EIF3G	3.05875e+06	3.15579e+06	2.97654e+06	3.24907e+06	3148250	3.30294e+06
O75822	EIF3J	2.19429e+06	2.30944e+06	2.18417e+06	2.51655e+06	2.60908e+06	2.34255e+06
O75832	PSMD10	425449	369947	422047	410752	427705	384460
O75843	AP1G2	673864	667576	677066	771960	811420	769336
O75844	ZMPSTE24	876250	819961	999366	863498	795947	1.02743e+06
O75864	PPP1R37	5706.72	15545.2	9074.24	13011.2	26700.8	39427.2
O75865	TRAPPC6A	96743.4	101092	87407.1	63925.7	56380.6	50391.5
O75874	IDH1	8.77661e+06	8.79347e+06	8.80212e+06	9.96674e+06	10408601	9.60855e+06
O75879	GATB	338965	343791	337515	327538	350079	321785
O75880	SCO1	875594	683927	885613	893907	737494	930527
O75882	ATRN	336898	312078	327481	279563	268064	278141
O75884	RBBP9	1.7098e+06	1.5977e+06	1.58938e+06	1.51707e+06	1.66084e+06	1.58204e+06
O75886	STAM2	162367	151774	155503	168465	164709	154783
O75896	TUSC2	107602	102272	104106	141196	125319	135177
O75901	RASSF9	105727	7206.48	232925	203174	190123	188163
O75907	DGAT1	133782	114337	165754	120089	108250	158138
O75909	CCNK	562381	554583	511455	555394	528163	533170
O75911	DHRS3	83728.3	94035.7	86102.7	56636.8	61285.5	63714.7
O75915	ARL6IP5	961070	882721	1.1666e+06	866436	701183	951557
O75925	PIAS1	241549	238454	193729	221373	228935	224596
O75928	PIAS2	22142.3	60003.8	43573.8	46403.4	44257.4	34998.6
O75934	BCAS2	555273	530626	552142	567160	596396	547686
O75935	DCTN3	528587	512870	510575	514118	552097	493206
O75937	DNAJC8	1.31099e+06	1.25163e+06	1.2826e+06	1.32889e+06	1.34403e+06	1.33318e+06
O75940	SMNDC1	485449	515019	521030	514373	531070	549085
O75943	RAD17	72152.2	66372.7	59298.4	38234	43091.8	43955.2
O75947	ATP5PD	3.1279e+06	3.04206e+06	3.02801e+06	3.09824e+06	2719397	2.8842e+06
O75954	TSPAN9	199195	203077	195395	154843	141135	152157
O75955	FLOT1	954938	998423	914555	917696	913692	926519
O75962	TRIO	61488.8	57036.9	55140.9	57714.9	59985.2	58300.9
O75964	ATP5MG	2.54042e+06	2.4305e+06	2.62938e+06	2.79646e+06	2.34821e+06	2.90785e+06
O75971	SNAPC5	6695.82	8739.31	5623.17	35255.2	14304.1	13961.5
O75976	CPD	645410	640362	631727	680211	654845	662208
O76003	GLRX3	2.9591e+06	2.84436e+06	2.87275e+06	3.09756e+06	3.13696e+06	3.01358e+06
O76021	RSL1D1	3.97842e+06	3.86146e+06	3.51448e+06	4.62086e+06	5.07316e+06	4.87307e+06
O76024	WFS1	564726	538979	604734	496794	438508	598075
O76031	CLPX	1.17852e+06	1.18291e+06	1.22282e+06	1.27987e+06	1.29617e+06	1.28454e+06
O76054	SEC14L2	186166	194659	179417	124531	132519	119444
O76061	STC2	12751.7	8128.51	10272.1	26932.1	28833.9	30138.1
O76062	TM7SF2	164186	144065	181435	141553	122162	203199
O76064	RNF8	33403.5	27883.8	35272.4	25872	28111.6	31761.3
O76070	SNCG	183433	172978	185275	66099.3	75557.9	62708.9
O76071	CIAO1	891197	915211	855014	893583	871051	832245
O76075	DFFB	144270	131736	133239	120025	133887	121170
O76080	ZFAND5	31520.3	32539.1	31256.6	36077.1	40268.8	36563.4
O76094	SRP72	1.21734e+06	1.26831e+06	1.15457e+06	1.32682e+06	1374359	1.33002e+06
O76095	JTB	574925	643581	525886	623008	601069	572359
O77932	DXO	65069.1	57999.9	63958.5	49387.6	45515.6	42104.3
O94760	DDAH1	1.22876e+06	1.1627e+06	1.2494e+06	1.27012e+06	1.26273e+06	1.17368e+06
O94762	RECQL5	1.01247e+06	1.06976e+06	998058	1.05915e+06	1.06555e+06	1.07882e+06
O94763	URI1	1.14946e+06	1.22012e+06	1.23759e+06	909717	1.18535e+06	915186
O94766	B3GAT3	248804	283095	240639	227106	221175	225554
O94776	MTA2	951678	871284	986406	1.01198e+06	952613	1.05682e+06
O94782	USP1	37321.5	32606.7	24045.8	37569.6	39443.1	46194.6
O94788	ALDH1A2	2.63096e+06	2.33156e+06	2.47403e+06	2.44161e+06	2615471	2.17931e+06
O94804	STK10	142803	135241	142183	122178	133486	125005
O94808	GFPT2	545744	526558	733031	419748	365702	365806
O94817	ATG12	120966	103093	116562	89296.5	100314	86045
O94822	LTN1	235133	223448	218709	208093	212156	219535
O94826	TOMM70	1.08021e+06	1.04015e+06	1.12818e+06	1.05639e+06	956555	1.11205e+06
O94829	IPO13	81516.4	88424.1	83790.7	84468.4	81735.8	68331.5
O94830	DDHD2	103068	87967.2	99427.6	97331.8	95486.6	95361.1
O94832	MYO1D	200529	214531	198830	179113	204536	198091
O94842	TOX4	550724	539501	550375	599712	669277	599778
O94854	KIAA0754	34796.2	34630.3	37547.9	41801.6	39345.9	29843.7
O94855	SEC24D	835411	835115	805017	773862	801313	753072
O94864	SUPT7L	125088	112769	128385	130831	129456	93805.9
O94868	FCHSD2	93175.9	80838.8	81668.6	102424	102429	99271
O94874	UFL1	795096	786319	812993	782171	834536	834217
O94875	SORBS2	280761	294574	285162	231839	222971	222675
O94876	TMCC1	313369	331476	338120	153958	104761	111679
O94880	PHF14	191711	198733	196608	220790	219350	219747
O94885	SASH1	37338.5	47798.1	36214	44102.6	43328.7	38185.5
O94886	TMEM63A	76733.2	88744.3	77262.5	64677.5	62956.9	74502.8
O94887	FARP2	150921	138230	150990	114778	123605	119213
O94888	UBXN7	364866	330987	355306	273354	294590	283175
O94889	KLHL18	77840.7	70667.8	18136.5	76828.2	96642.5	56087.7
O94901	SUN1	199124	154055	238121	116176	106328	165908
O94903	PLPBP	1.17264e+06	1.05584e+06	1.16245e+06	1.25439e+06	1.30413e+06	1.18185e+06
O94905	ERLIN2	1.73291e+06	1.68127e+06	1.85848e+06	2.08871e+06	1.93926e+06	2.28983e+06
O94906	PRPF6	1.44743e+06	1.43061e+06	1.41086e+06	1.48224e+06	1.51776e+06	1.52982e+06
O94907	DKK1	586196	533988	494406	248319	214246	236852
O94913	PCF11	94978.8	84913	93245.1	97248.5	107696	102680
O94915	FRYL	68092.8	70520.4	69786.2	73195.3	77033.7	72305.9
O94916	NFAT5	129770	113486	124898	104875	100051	101647
O94919	ENDOD1	88480.9	91995.2	95799.4	82869.1	97592.5	131117
O94925	GLS	1.5962e+06	1.46865e+06	1.5215e+06	1.46403e+06	1.3957e+06	1.54136e+06
O94927	HAUS5	117747	113225	117937	119324	119048	119853
O94941	UBOX5	33154.8	35364.3	27991.9	36271.1	17768.8	21598.5
O94952	FBXO21	67623.4	59610.7	62750.2	66592.7	65078.7	65858.5
O94953	KDM4B	122900	104622	116564	133194	107424	128489
O94964	SOGA1	51950.9	57101.7	52693.6	49634.8	50917.7	46215.1
O94966	USP19	230680	226205	230595	255667	251509	241607
O94967	WDR47	67433.2	67062.8	53217.7	51427.8	59662.7	58745.5
O94973	AP2A2	473884	489220	454948	438713	449498	415828
O94979	SEC31A	3.36004e+06	3.44609e+06	3.39726e+06	3.71917e+06	3761887	3.50192e+06
O94985	CLSTN1	12228.7	14217.9	8564.88	74446	62862.7	18965.5
O94992	HEXIM1	711911	694118	696503	912847	922513	795764
O95049	TJP3	984334	985343	927579	879506	827348	847031
O95059	RPP14	146882	143742	192615	149330	177610	170252
O95067	CCNB2	162175	184115	160993	149432	169905	153815
O95070	YIF1A	359607	337446	345709	303863	268922	304505
O95071	UBR5	386465	392394	370827	322238	307984	314582
O95081	AGFG2	668405	691096	679759	617934	675468	588898
O95104	SCAF4	492736	575687	495893	496413	513352	499893
O95139	NDUFB6	358075	337262	357764	402313	359950	417495
O95140	MFN2	360430	394470	359329	398030	406727	417980
O95149	SNUPN	141072	77849.3	93754.9	145838	159424	156675
O95155	UBE4B	347731	339761	326618	345700	395368	318772
O95159	ZFPL1	591691	559976	518835	554920	493586	539010
O95163	ELP1	807830	823078	779943	872723	923142	857485
O95166	GABARAP	231869	240177	218472	296880	238413	255504
O95167	NDUFA3	389596	407392	436485	380785	321556	381409
O95168	NDUFB4	1.17621e+06	1.1961e+06	1.24038e+06	1.24797e+06	1.13375e+06	1.25786e+06
O95169	NDUFB8	864426	770872	782849	629817	598624	674429
O95182	NDUFA7	477205	386777	448253	408250	440586	396959
O95183	VAMP5	125132	128998	131728	178630	173008	183688
O95197	RTN3	459303	434661	496797	397389	349471	434139
O95202	LETM1	874727	879782	924746	888175	798872	932475
O95208	EPN2	187372	188484	155690	87048.9	94502.3	84056.5
O95210	STBD1	223322	233225	225131	174028	165472	177903
O95214	LEPROTL1	108156	139381	112852	99683.3	94040.5	91119
O95218	ZRANB2	932442	980647	922667	602107	603616	577703
O95219	SNX4	319345	320125	331504	313476	325487	313033
O95229	ZWINT	96627.4	116731	112406	145646	157368	137072
O95232	LUC7L3	1.1161e+06	1.13103e+06	1.13928e+06	1.29552e+06	1.34407e+06	1.36607e+06
O95235	KIF20A	181520	186856	158860	190071	204423	205749
O95238	SPDEF	19990.8	21701	26227.6	22655.7	12942.9	5769.21
O95239	KIF4A	337044	309277	352227	445018	380574	453832
O95243	MBD4	28630.4	25015.1	24602.3	31397.9	29208.1	31644.1
O95248	SBF1	154437	164025	156027	148144	151723	147542
O95249	GOSR1	369589	397609	367277	425590	407699	411653
O95251	KAT7	164777	163805	153098	164600	187208	180591
O95255	ABCC6	102741	101850	128264	152224	146608	142112
O95260	ATE1	405751	395627	373457	364875	379758	356506
O95273	CCNDBP1	49364.6	48179.7	53853.5	54442.3	54396.7	51994.1
O95292	VAPB	993972	949349	1.09304e+06	976981	878386	1.12128e+06
O95295	SNAPIN	232421	219050	232096	245084	226162	256260
O95297	MPZL1	316851	302731	300841	279058	276899	282301
O95298	NDUFC2	1.14895e+06	1.08692e+06	1.16417e+06	1.08145e+06	1.15798e+06	1.21525e+06
O95299	NDUFA10	1.14811e+06	1.12283e+06	1.14062e+06	1.06803e+06	1.14452e+06	1.0596e+06
O95302	FKBP9	623016	684244	647409	673288	674699	704918
O95336	PGLS	1.42444e+06	1.47583e+06	1.46478e+06	1.55766e+06	1.59722e+06	1.54766e+06
O95342	ABCB11	95258	124836	98566.9	84523.9	73029	97330.7
O95347	SMC2	846270	854510	820695	938406	955375	942869
O95352	ATG7	172184	166962	175144	180420	194767	169768
O95359	TACC2	101877	105661	93053.7	104319	119297	120401
O95363	FARS2	152173	140631	163170	145801	153551	141066
O95365	ZBTB7A	63509.8	66580	82702	78698	74591.1	81315.3
O95372	LYPLA2	1.31262e+06	1.39832e+06	1.27007e+06	1.23734e+06	1.32237e+06	1.35697e+06
O95373	IPO7	2.49744e+06	2.47564e+06	2.49179e+06	3.09589e+06	3.32055e+06	3.08749e+06
O95376	ARIH2	191902	200016	188895	166886	188836	169086
O95391	SLU7	178563	197635	165076	161863	166168	170732
O95394	PGM3	1.4884e+06	1.52259e+06	1.52496e+06	1.42748e+06	1.51847e+06	1.42545e+06
O95396	MOCS3	576204	585815	577365	560380	580999	571493
O95400	CD2BP2	1.13794e+06	1.132e+06	1.0563e+06	1.2823e+06	1.21553e+06	1.17329e+06
O95425	SVIL	321230	322596	311105	273960	280767	268068
O95429	BAG4	220785	214815	233218	194564	219400	177230
O95433	AHSA1	2.49365e+06	2.5733e+06	2.49884e+06	2.80082e+06	3.05077e+06	2.79104e+06
O95445	APOM	180349	182720	156938	182482	161319	161750
O95453	PARN	625624	645173	619661	707978	718612	733375
O95456	PSMG1	819080	876946	811662	969350	1.04022e+06	989866
O95470	SGPL1	632001	621224	729885	603931	554318	744575
O95476	CTDNEP1	118430	132166	116799	157457	152220	181717
O95477	ABCA1	39749.1	35744.3	42756.6	38914.3	45323.6	44125.3
O95478	NSA2	974357	924459	1.05654e+06	1.15017e+06	1.16112e+06	1.20073e+06
O95479	H6PD	307311	296271	304888	258334	265000	267193
O95486	SEC24A	1.17667e+06	1.12328e+06	1.15019e+06	1.10233e+06	1.17706e+06	1.0569e+06
O95487	SEC24B	562964	541466	541241	526352	570247	548620
O95490	ADGRL2	59860.1	53255.6	58172.7	36484.1	55051	20508.3
O95497	VNN1	9191.6	5317.92	8577.51	22717.7	6499.11	9851.25
O95528	SLC2A10	41329.9	27606.5	33137.3	47597.2	8371.01	6288.23
O95544	NADK	238834	289796	232500	265150	284214	270219
O95551	TDP2	156921	159133	161355	150999	160944	150731
O95562	SFT2D2	293622	288810	265827	177982	254031	168092
O95563	MPC2	508310	472510	566032	592513	494539	595116
O95571	ETHE1	1.60206e+06	1.38797e+06	1.44219e+06	1.3672e+06	1.35746e+06	1.37567e+06
O95573	ACSL3	2.22239e+06	2.06863e+06	2.30062e+06	2.15423e+06	1.93143e+06	2.38629e+06
O95602	POLR1A	347614	345996	348657	416480	415320	434861
O95613	PCNT	42861.1	35062.5	35879.2	45362.8	49937.8	44510.7
O95619	YEATS4	133985	133170	134224	155397	165130	159586
O95625	ZBTB11	25521.8	28093.9	29314.8	32346.8	36609.1	40138.4
O95628	CNOT4	55338	57440.5	46702.3	68963.3	56766.9	59446.8
O95630	STAMBP	362008	376694	342763	355454	355599	340990
O95633	FSTL3	27768.4	27656.8	24508.2	18622.5	11970.7	7652.22
O95639	CPSF4	488388	464842	466538	532794	483961	530258
O95671	ASMTL	250725	266333	254652	202766	204801	217889
O95674	CDS2	261537	315784	288057	196924	163522	216277
O95684	CEP43	619721	702647	685777	745044	754852	702560
O95685	PPP1R3D	63761	60988.4	59475.1	65014.1	62706.9	59255.2
O95696	BRD1	171381	160014	186167	228029	201960	239730
O95707	POP4	166818	175894	166258	165648	183089	171771
O95714	HERC2	35151.6	26611.9	18625.4	27947.7	29302.8	28890.9
O95716	RAB3D	197521	162912	179712	80644.3	107746	116925
O95721	SNAP29	424458	467756	422607	395105	436284	412139
O95747	OXSR1	1.10335e+06	1.10247e+06	1.07193e+06	977332	979965	951797
O95749	GGPS1	74266.2	87581.4	80437.8	85885.4	77417.4	78197.3
O95757	HSPA4L	1.4529e+06	1.47145e+06	1.46083e+06	1.5158e+06	1.47103e+06	1.39981e+06
O95758	PTBP3	1.68072e+06	1.59489e+06	1.66713e+06	1.40893e+06	1491438	1.42026e+06
O95759	TBC1D8	36280.9	48377.1	36563.5	34437.7	44548	37542
O95777	LSM8	1.17234e+06	1.30558e+06	1.121e+06	1.12852e+06	1.17352e+06	1.093e+06
O95782	AP2A1	1.50197e+06	1.47808e+06	1.4424e+06	1.56065e+06	1.56342e+06	1.58326e+06
O95785	WIZ	99142.7	99239.9	109998	117866	115284	117931
O95786	DDX58	80067.3	159784	90103.8	648640	692194	631985
O95793	STAU1	2.62441e+06	2.56986e+06	2.68099e+06	3.12502e+06	3.03883e+06	3.27419e+06
O95801	TTC4	142843	173633	142324	220853	218928	215409
O95807	TMEM50A	129408	108690	126188	115721	137356	142804
O95810	CAVIN2	1.01217e+06	937000	1.02036e+06	825307	759275	767808
O95816	BAG2	1.40834e+06	1.40468e+06	1.3134e+06	1.68503e+06	1714300	1.7203e+06
O95817	BAG3	192860	198290	200120	245805	253396	214455
O95819	MAP4K4	1.09476e+06	1.03715e+06	1.05433e+06	1.11885e+06	1177131	1.12546e+06
O95822	MLYCD	104294	107270	109994	109337	109646	94819.6
O95825	CRYZL1	268026	223182	235974	257860	249456	277548
O95831	AIFM1	1.4181e+06	1.32367e+06	1.43584e+06	1.36017e+06	1.29319e+06	1.448e+06
O95832	CLDN1	127759	131038	138409	85262.3	107639	93159.4
O95833	CLIC3	197598	197340	189192	86894.3	99737.3	91686.1
O95834	EML2	325932	299449	299356	199803	215434	179624
O95837	GNA14	42516	26285.7	32652.6	31189.1	26382.5	26854
O95848	NUDT14	77641.7	84219.6	74285.4	59871.7	56410.8	50296.2
O95857	TSPAN13	70074.2	93545.5	64795	53799.2	41456.5	39494.3
O95861	BPNT1	1.62193e+06	1.57203e+06	1.64537e+06	1.51745e+06	1.43725e+06	1.41879e+06
O95864	FADS2	12976.5	17170.8	9465.32	31229.8	22799	41917.2
O95865	DDAH2	624004	649803	682736	558250	550036	519796
O95870	ABHD16A	125649	112731	123376	163992	126542	175335
O95873	C6orf47	42223.4	34389.9	44454.5	43903.1	56108.2	54817.9
O95881	TXNDC12	2.1306e+06	2.02739e+06	2.06864e+06	2.15185e+06	2.33113e+06	2.39835e+06
O95900	TRUB2	107495	109662	107942	152460	142560	144599
O95905	ECD	228393	259961	218636	329278	326375	333684
O95926	SYF2	162146	142381	165981	148546	171491	164651
O95954	FTCD	1.00996e+06	1.02385e+06	964510	987778	1008955	1.00604e+06
O95983	MBD3	452900	473311	448214	523411	535868	521918
O95985	TOP3B	115046	96304.6	99664.3	89767.6	103954	100231
O95989	NUDT3	323928	317928	300806	304560	310966	294582
O95994	AGR2	219096	227178	193481	232377	262940	252790
O95997	PTTG1	159233	135916	141505	71865.4	92593.4	77655.5
O95999	BCL10	295939	340895	302418	253950	276025	258324
O96000	NDUFB10	1.5613e+06	1.69436e+06	1.59858e+06	1.55343e+06	1.48092e+06	1.52298e+06
O96005	CLPTM1	1.57216e+06	1.58139e+06	1.69685e+06	1.83699e+06	1.66047e+06	2.19691e+06
O96006	ZBED1	189678	194037	187115	217161	219458	216719
O96007	MOCS2	136351	119759	136559	155533	162554	144682
O96008	TOMM40	2.69102e+06	2.41127e+06	2.68794e+06	2.48352e+06	2.32673e+06	2.66428e+06
O96011	PEX11B	302825	329819	309071	283106	292355	257849
O96013	PAK4	198641	186243	182708	193584	196263	192974
O96017	CHEK2	445790	457535	438802	384204	353310	370088
O96019	ACTL6A	764923	714130	736679	763921	775907	774782
O96028	NSD2	290349	313704	305549	367410	382773	370952
O96033	MOCS2	334406	320098	325224	336286	350073	320709
P00156	MT-CYB	242971	179082	245393	264188	209285	255201
P00167	CYB5A	2.6341e+06	2.60794e+06	2.67139e+06	3.00986e+06	2.71298e+06	3.17702e+06
P00338	LDHA	2.9073e+07	2.70771e+07	2.96839e+07	2.81566e+07	28197464	2.9455e+07
P00352	ALDH1A1	1.16194e+07	1.13117e+07	1.14623e+07	1.29604e+07	12969409	1.28421e+07
P00367	GLUD1	1.04366e+07	1.00973e+07	9.91273e+06	1.06584e+07	10852250	1.10346e+07
P00374	DHFR	330025	308001	345418	428294	447721	437962
P00387	CYB5R3	4.8098e+06	4.64923e+06	5.00763e+06	4.11702e+06	3.90513e+06	4.90607e+06
P00390	GSR	3.8698e+06	3.73447e+06	3.79956e+06	3.96471e+06	4023784	3.8603e+06
P00395	MT-CO1	118079	116591	121659	110131	110502	112840
P00403	MT-CO2	2.94571e+06	2.73076e+06	3.13515e+06	2.82149e+06	2482399	3.20307e+06
P00414	MT-CO3	262155	253806	280595	134225	126530	136020
P00439	PAH	557922	536277	582570	703029	724509	689974
P00441	SOD1	8.08165e+06	7.34761e+06	7.31762e+06	8.4291e+06	8420862	8.07662e+06
P00450	CP	103027	99966.4	102926	47478.1	49229.1	38506.6
P00491	PNP	1.6881e+06	1.57876e+06	1.58448e+06	1.63946e+06	1774723	1.62312e+06
P00492	HPRT1	1.00223e+06	1.04222e+06	1.04125e+06	997540	977803	943409
P00505	GOT2	6.42309e+06	6.12223e+06	6.13648e+06	6.08804e+06	6.21334e+06	6.39359e+06
P00519	ABL1	43385.1	40472.4	46490.9	41308.3	44943.1	34061.2
P00533	EGFR	84353.7	63169.2	70780.6	62010.7	61995	60671.7
P00558	PGK1	1.55573e+07	1.46891e+07	1.52691e+07	1.29664e+07	12952397	1.28405e+07
P00568	AK1	1.4455e+06	1.50322e+06	1.47177e+06	1.33718e+06	1.38054e+06	1.27402e+06
P00734	F2	633757	637517	582286	346240	290918	310748
P00742	F10	84488.8	81422.8	78682.8	29949.9	28586	29676.7
P00747	PLG	35083.7	50927.9	12379.1	56691.7	28991.2	31222.9
P00751	CFB	42076.7	42900.5	36072.3	84102	66552.4	67935.7
P00813	ADA	198476	183397	191602	137685	146603	127628
P00846	MT-ATP6	1.58249e+06	1.36518e+06	1.5809e+06	1.22818e+06	1.18303e+06	1.18862e+06
P00966	ASS1	1.75284e+06	1.77435e+06	1.68527e+06	1.34775e+06	1.37224e+06	1.25913e+06
P00973	OAS1	55443.5	113445	55432.2	612474	527866	579233
P01008	SERPINC1	47481.2	55713.2	52686.1	52373	39556.8	45217.4
P01009	SERPINA1	570888	578833	563421	887677	825639	841029
P01011	SERPINA3	391102	359921	393748	235424	238057	261699
P01019	AGT	679351	702210	647368	831532	761554	821367
P01023	A2M	2.25294e+06	2.08121e+06	2.20931e+06	1.5672e+06	1.47063e+06	1.53581e+06
P01024	C3	761488	796062	735458	731637	618377	659486
P01031	C5	46998.8	51447.5	49363.8	37811.5	35515.5	35032
P01033	TIMP1	51340.9	82136.4	65382.7	77455.6	71122.7	59084.9
P01034	CST3	505337	509190	436354	534362	562608	532010
P01111	NRAS	1.36922e+06	1.37131e+06	1.3161e+06	1.15833e+06	1.08271e+06	1.20748e+06
P01112	HRAS	204815	216102	138797	93080.9	101756	109394
P01116	KRAS	101845	78618.9	92891	82242.7	74124.5	98359.5
P01130	LDLR	131963	134145	130886	237755	224287	222922
P01135	TGFA	37273.2	10421.8	5193.73	9096.18	10154.5	9715.14
P01137	TGFB1	90410.2	98186.6	92936.8	88156.3	98893.6	83505.4
P01344	IGF2	150603	165490	146334	103682	103613	90106.7
P01889	HLA-B	162705	308672	176805	685383	746763	668506
P01893	HLA-H	202535	229770	166802	906167	823329	870330
P02042	HBD	1.46852e+06	1.4952e+06	1.78978e+06	1.29321e+06	1.23075e+06	1.02017e+06
P02462	COL4A1	33279.9	53219.6	17878.1	58034.9	49642.3	53885.6
P02533	KRT14	44934.6	23532.2	40699	18219.7	12463.3	24857.8
P02545	LMNA	1.21618e+07	1.20313e+07	1.14834e+07	1.01485e+07	10667768	1.0778e+07
P02647	APOA1	1.14081e+06	1.04653e+06	1.12261e+06	1.37856e+06	1.31247e+06	1.32036e+06
P02649	APOE	1.48395e+06	1.57342e+06	1.5103e+06	1.6182e+06	1.67725e+06	1.63001e+06
P02652	APOA2	468424	519225	473154	582182	637392	628828
P02654	APOC1	153773	160167	138564	233874	230874	225099
P02655	APOC2	422453	467386	303507	538471	515400	532434
P02656	APOC3	227814	217835	196848	183378	187221	183163
P02671	FGA	466401	458822	418331	466320	428941	484631
P02675	FGB	990143	1.02634e+06	929008	990146	945558	1.02025e+06
P02679	FGG	559868	538365	508540	623084	621929	671783
P02686	MBP	31787.6	37171.1	33802.2	34668.9	34565.3	36244
P02748	C9	222343	244414	378420	352403	261983	257606
P02749	APOH	474350	508676	456179	725116	619069	615087
P02751	FN1	1.38292e+06	1.40436e+06	1.34539e+06	909315	832727	835127
P02753	RBP4	1.88368e+06	2.03854e+06	1.78681e+06	1.53936e+06	1.50658e+06	1.59514e+06
P02760	AMBP	621121	601905	617910	872798	832552	808362
P02763	ORM1	206825	216691	217977	382547	350737	380260
P02765	AHSG	1.55128e+06	1.47595e+06	1.57729e+06	1.81036e+06	1.52779e+06	1.55367e+06
P02768	ALB	6.68454e+06	6.96298e+06	6.58024e+06	7.00064e+06	6174847	6.2634e+06
P02771	AFP	2.58048e+06	2.50437e+06	2.39908e+06	2.63641e+06	2388343	2.48364e+06
P02774	GC	69969.6	92505.6	65517.3	158558	76654.8	79966.4
P02786	TFRC	1.18714e+06	1.17478e+06	1.23804e+06	1.50288e+06	1.40707e+06	1.3978e+06
P02787	TF	2.93027e+06	2.90713e+06	2.82256e+06	2.54729e+06	2.07596e+06	2.12969e+06
P02788	LTF	328122	227079	208394	1.34364e+06	630034	644689
P02792	FTL	795931	860265	835524	1.08673e+06	1.21523e+06	1.31795e+06
P02794	FTH1	523984	636287	584355	752736	788985	778565
P02795	MT2A	523680	464521	814056	5.98036e+06	7.60263e+06	5.00982e+06
P03886	MT-ND1	325000	363212	382002	276663	242348	315980
P03891	MT-ND2	257880	272065	288405	220035	199737	240703
P03897	MT-ND3	397180	403422	379656	384672	297402	384253
P03905	MT-ND4	399640	402613	445640	319582	267676	331027
P03915	MT-ND5	341519	310508	391276	280748	266951	274469
P03923	MT-ND6	163175	157754	203726	148093	141144	182189
P03928	MT-ATP8	1.00035e+06	1.06267e+06	1.04623e+06	714593	730764	682481
P03951	F11	4335.86	2042.17	3152.15	7456.8	5062.87	6265.53
P04003	C4BPA	662769	640109	612533	630142	525002	596046
P04004	VTN	310019	217861	314676	290327	276432	259331
P04035	HMGCR	51775.2	2412.73	16716.5	61209.5	58587.6	70649.3
P04040	CAT	2.21582e+06	2.12506e+06	2.16002e+06	2.21322e+06	2.30946e+06	2.24932e+06
P04049	RAF1	148339	133498	144601	162502	160713	150975
P04062	GBA	638910	576220	611405	456927	486223	489474
P04066	FUCA1	891270	855754	831717	572917	610336	611863
P04070	PROC	91767.4	85425.3	77616.9	57536.8	67029.3	44900
P04075	ALDOA	5.08416e+07	5.08184e+07	5.03693e+07	4.85755e+07	48661688	4.80253e+07
P04080	CSTB	3.46899e+06	3.47078e+06	3.10479e+06	3.12168e+06	3.30846e+06	2.95096e+06
P04114	APOB	1.03452e+06	1.06166e+06	940958	1.27448e+06	1.138e+06	1.26495e+06
P04150	NR3C1	77567.5	76855.9	82379.1	93114.1	90958.7	89206.4
P04156	PRNP	351784	350578	344555	375684	364733	349686
P04179	SOD2	5.98491e+06	5.34195e+06	5.7998e+06	5.18402e+06	5.2858e+06	5.64807e+06
P04181	OAT	2.50536e+06	2.30508e+06	2.32598e+06	1.92242e+06	1901911	2.02825e+06
P04183	TK1	1.28901e+06	1.43913e+06	1.15687e+06	1.1948e+06	1.13053e+06	1.18777e+06
P04217	A1BG	13861.5	35718.7	7401.55	69763.5	7083.7	11376.9
P04233	CD74	279726	300987	262417	237324	236408	311235
P04259	KRT6B	2.90817e+07	2.68319e+07	2.89803e+07	2.40845e+07	21631994	2.31884e+07
P04264	KRT1	2.2531e+06	1.40728e+06	2.20944e+06	1.43399e+06	987041	2.02192e+06
P04350	TUBB4A	47271.9	32746.6	34651.8	32976	33664.6	60770.2
P04406	GAPDH	6.70808e+07	6.36336e+07	6.11985e+07	7.00521e+07	73543584	7.51125e+07
P04424	ASL	602866	624718	606432	620927	605007	615614
P04439	HLA-A	4.07527e+06	4.17585e+06	3.90087e+06	6.35851e+06	5.91362e+06	5.98525e+06
P04626	ERBB2	170419	151800	162127	133019	134758	136351
P04632	CAPNS1	1.13513e+06	1.27132e+06	1.19319e+06	1.25477e+06	1.38694e+06	1.31032e+06
P04637	TP53	57873.3	64835.2	60048.2	28202.5	27488.8	30022.8
P04731	MT1A	43857.4	24169.7	45526.5	109306	119001	92596
P04732	MT1E	150455	199490	143315	341596	552932	329341
P04733	MT1F	353599	421805	302545	794685	767430	711818
P04792	HSPB1	4.4625e+06	4.41939e+06	4.39164e+06	5.22355e+06	5.42084e+06	4.88133e+06
P04798	CYP1A1	102953	97495	126545	379109	321861	467321
P04818	TYMS	390981	396566	386868	1.17135e+06	1.27428e+06	1.31352e+06
P04843	RPN1	6.28996e+06	5.80997e+06	7.23097e+06	6.05856e+06	5519900	7.30442e+06
P04844	RPN2	3.59695e+06	3.30031e+06	4.08879e+06	3.27111e+06	2.91835e+06	4.21922e+06
P04899	GNAI2	1.53081e+06	1.56998e+06	1.48597e+06	1.49368e+06	1.47247e+06	1.53669e+06
P04920	SLC4A2	132675	141485	133239	255991	247796	268496
P05023	ATP1A1	7.62654e+06	7.85106e+06	7.64877e+06	6.94974e+06	6.59405e+06	7.20846e+06
P05026	ATP1B1	4.09831e+06	4.0585e+06	3.93728e+06	3.4721e+06	3.46015e+06	3.69486e+06
P05067	APP	212365	213795	212057	160379	147987	152006
P05091	ALDH2	1.06642e+07	1.05962e+07	1.0459e+07	1.03195e+07	10236814	1.0319e+07
P05107	ITGB2	36617.5	37076.9	19344.6	8961.01	7261.99	12503.6
P05114	HMGN1	1.37059e+06	1.24579e+06	1.33069e+06	1.04897e+06	1.12906e+06	1.26611e+06
P05121	SERPINE1	154708	157703	136427	168858	161413	158191
P05141	SLC25A5	1.59933e+07	1.54882e+07	1.60232e+07	1.65966e+07	16438499	1.78592e+07
P05154	SERPINA5	67628.7	57930.9	61845.7	77486.7	68659.7	78810.3
P05156	CFI	176141	197750	173852	195255	194415	187566
P05161	ISG15	1.15857e+06	4.70787e+06	1.27457e+06	1.29218e+07	12860820	1.15955e+07
P05162	LGALS2	35598.6	36102.6	33414.4	50186.7	46759.2	51904.8
P05165	PCCA	340074	323200	332273	260681	287057	292397
P05166	PCCB	414049	413162	420826	378817	384947	381854
P05198	EIF2S1	4.90461e+06	4.89344e+06	4.76626e+06	5.06211e+06	5048335	5.3584e+06
P05204	HMGN2	2.71353e+06	2.29086e+06	2.96336e+06	2.89201e+06	2.60496e+06	3.3661e+06
P05362	ICAM1	2.40269e+06	2.42886e+06	2.40476e+06	1.88569e+06	1.76975e+06	1.81408e+06
P05386	RPLP1	6.9149e+06	6.66148e+06	6.56385e+06	8.45117e+06	7.18172e+06	7.78031e+06
P05387	RPLP2	1.28583e+07	1.23627e+07	1.20712e+07	1.43299e+07	14974767	1.44693e+07
P05388	RPLP0	8.06373e+06	7.89871e+06	7.59671e+06	9.18081e+06	9615968	9.75742e+06
P05412	JUN	79325.3	84157.4	65143.4	115770	115215	115033
P05423	POLR3D	342774	326996	331501	351721	361395	360882
P05455	SSB	5.29635e+06	4.98995e+06	5.27868e+06	4.81106e+06	4.84078e+06	5.18864e+06
P05496	ATP5MC1	801717	1.54322e+06	754671	995605	1.60111e+06	1.15494e+06
P05543	SERPINA7	113786	97480.7	103470	87862.6	77691	90279.5
P05546	SERPIND1	200222	171198	203855	148656	143957	157322
P05556	ITGB1	1.09212e+06	1.10603e+06	1.08125e+06	1.04784e+06	988461	1.18537e+06
P05783	KRT18	3.18352e+07	3.1523e+07	3.23386e+07	2.79621e+07	27785682	3.20269e+07
P05787	KRT8	4.37739e+07	4.29481e+07	4.08182e+07	3.85286e+07	38430464	4.47278e+07
P05981	HPN	198631	180155	193515	145445	127038	138707
P06132	UROD	2.37241e+06	2.36636e+06	2.21454e+06	2.48782e+06	2.63857e+06	2.39645e+06
P06213	INSR	244175	220608	215206	178481	174287	180149
P06280	GLA	331043	290260	281732	207483	210934	171529
P06396	GSN	1.22682e+06	1.23856e+06	1.16553e+06	875424	869378	831199
P06400	RB1	318477	337593	314526	303904	309189	308011
P06454	PTMA	1.48574e+07	1.47309e+07	1.43203e+07	1.30293e+07	13303508	1.17766e+07
P06493	CDK1	2.9731e+06	3.14167e+06	3.05286e+06	3.51525e+06	3.57109e+06	3.50776e+06
P06576	ATP5F1B	1.39913e+07	1.3389e+07	1.32038e+07	1.37877e+07	14221022	1.48328e+07
P06681	C2	97004.6	98327.9	96242	120147	125137	139156
P06703	S100A6	6.3057e+06	5.96465e+06	6.42492e+06	6.73632e+06	6401799	6.40271e+06
P06730	EIF4E	2.371e+06	2.28798e+06	2.31892e+06	2.30357e+06	2.49401e+06	2.21636e+06
P06733	ENO1	5.63503e+07	5.31019e+07	5.08683e+07	5.03244e+07	53617572	5.1736e+07
P06737	PYGL	506460	511905	524143	516776	535996	514944
P06744	GPI	5.49721e+06	5.522e+06	5.51211e+06	5.81557e+06	5749470	5.74224e+06
P06746	POLB	254856	246561	256534	235220	223491	211383
P06748	NPM1	3.03385e+07	2.94407e+07	2.63526e+07	2.6931e+07	29340550	2.95829e+07
P06753	TPM3	6.77224e+06	6.41766e+06	5.83555e+06	6.26536e+06	6.89157e+06	6.18765e+06
P06756	ITGAV	272536	257303	264639	234222	217440	248672
P06865	HEXA	1.62188e+06	1.52188e+06	1.62232e+06	1.11848e+06	1.16099e+06	1.07573e+06
P06899	H2BC11	7.1956e+06	6.42218e+06	6.96538e+06	8.28179e+06	9882239	9.24532e+06
P07099	EPHX1	1.29738e+06	1.18123e+06	1.40003e+06	1.2717e+06	1.1313e+06	1.49019e+06
P07108	DBI	3.80252e+06	3.22368e+06	3.65918e+06	4.20054e+06	4.57102e+06	4.24885e+06
P07148	FABP1	3.8309e+06	4.09398e+06	3.69059e+06	3.74863e+06	3.75601e+06	3.49651e+06
P07199	CENPB	491133	452216	436454	356314	376386	402830
P07203	GPX1	400171	382628	407874	342491	310399	324902
P07205	PGK2	84399.1	41269.3	39690.3	34407.4	38292.7	25766.2
P07225	PROS1	82806.2	78853.3	81932.3	66846.4	59580.8	69638.1
P07237	P4HB	2.52356e+07	2.40135e+07	2.42959e+07	2.61041e+07	25194424	2.62001e+07
P07305	H1-0	5.58744e+06	5.39352e+06	6.1849e+06	3.11935e+06	3.44863e+06	4.10857e+06
P07306	ASGR1	3.25305e+06	3.01269e+06	3.30045e+06	3.4133e+06	3.2473e+06	3.11991e+06
P07307	ASGR2	831211	888871	858757	1.00667e+06	936785	864014
P07311	ACYP1	469099	507280	470009	390883	396085	332676
P07332	FES	152077	166819	121421	118148	72604.1	105525
P07339	CTSD	6.4464e+06	6.43411e+06	6.20733e+06	5.18325e+06	5173301	5.32271e+06
P07355	ANXA2	554370	529740	517904	418464	475761	410553
P07384	CAPN1	1.76667e+06	1.74852e+06	1.75307e+06	1.89893e+06	1.96871e+06	1.87349e+06
P07437	TUBB	4.37958e+07	4.4773e+07	4.61183e+07	4.72109e+07	50979060	5.07287e+07
P07477	PRSS1	1.10377e+06	1.03605e+06	853730	844538	740447	802658
P07602	PSAP	6.82686e+06	6.53526e+06	6.10528e+06	6.15394e+06	5.72535e+06	6.02326e+06
P07686	HEXB	1.72363e+06	1.73617e+06	1.66007e+06	1.04105e+06	1031054	1.06945e+06
P07711	CTSL	612297	563338	582257	396618	378230	367050
P07737	PFN1	3.55393e+07	3.36156e+07	3.54695e+07	3.63054e+07	37876304	3.6126e+07
P07738	BPGM	21898.4	27124.1	31837	22859.6	14923.5	10135
P07741	APRT	2.93837e+06	2.81248e+06	2.9633e+06	3.10253e+06	3.18789e+06	2.96665e+06
P07814	EPRS1	2.45975e+06	2.38307e+06	2.32787e+06	2.28108e+06	2.41975e+06	2.32456e+06
P07858	CTSB	9.19178e+06	8.60591e+06	8.50835e+06	7.07768e+06	7018864	7.39173e+06
P07900	HSP90AA1	1.93124e+07	1.87328e+07	1.77847e+07	2.3458e+07	24060616	2.26404e+07
P07902	GALT	195543	180242	173064	200894	193048	184113
P07910	HNRNPC	2.04051e+07	1.90637e+07	2.06043e+07	2.15609e+07	20738786	2.33727e+07
P07919	UQCRH	1.27677e+06	1.39173e+06	1.23076e+06	1.33762e+06	1225357	1.35052e+06
P07942	LAMB1	735844	732415	750428	877173	781389	853176
P07947	YES1	1.32845e+06	1.33518e+06	1.26694e+06	1.23162e+06	1.209e+06	1.18266e+06
P07948	LYN	146545	180283	157320	150120	153670	138818
P07951	TPM2	186600	181839	223981	224655	229228	193515
P07954	FH	3.41452e+06	3.46699e+06	3.32621e+06	3.58018e+06	3.51384e+06	3.70569e+06
P07992	ERCC1	194947	159379	191759	167537	163280	144357
P07996	THBS1	121047	119750	121765	211752	197505	214742
P08034	GJB1	37504.5	49770.1	31634.6	54829	53614.2	58387.1
P08047	SP1	134264	139750	134183	123753	109755	121224
P08048	ZFY	72237.8	41528.6	52361	33585.6	16637.8	48092.7
P08069	IGF1R	219653	229106	212258	160164	146463	159144
P08133	ANXA6	1.32166e+06	1.31576e+06	1.30689e+06	1.27236e+06	1327558	1.23169e+06
P08134	RHOC	3.12853e+06	2.92701e+06	2.94737e+06	3.6544e+06	3049000	3.51044e+06
P08183	ABCB1	696759	697028	689751	757767	727800	761041
P08195	SLC3A2	4.99298e+06	4.88532e+06	4.93751e+06	5.58896e+06	5546847	5.80254e+06
P08236	GUSB	85733.1	67778	80364.8	59173.9	60278.9	66881.9
P08237	PFKM	992711	864028	917903	838845	900648	743847
P08238	HSP90AB1	3.8361e+07	3.79821e+07	3.60026e+07	4.85609e+07	50675560	4.85159e+07
P08240	SRPRA	474787	467154	524369	405190	351814	456036
P08243	ASNS	2.08681e+06	2.03838e+06	2.19225e+06	1.58766e+06	1.70685e+06	1.69954e+06
P08319	ADH4	568646	536465	552782	602596	599168	604586
P08397	HMBS	386995	353170	335950	352151	340432	330379
P08559	PDHA1	2.87955e+06	2.92307e+06	2.79446e+06	2.64474e+06	2.62835e+06	2.89946e+06
P08574	CYC1	2.11762e+06	1.76956e+06	2.37947e+06	1.78819e+06	1.55689e+06	1.86469e+06
P08579	SNRPB2	1.28399e+06	1.21428e+06	1.26472e+06	1.04882e+06	1061101	1.10453e+06
P08581	MET	211265	221799	220805	182253	197099	186760
P08582	MELTF	60747.7	54993.4	55048.8	22013.5	17784	24179
P08621	SNRNP70	2.62959e+06	2.11692e+06	2.69747e+06	2.65958e+06	2.67687e+06	2.81391e+06
P08651	NFIC	73131.8	69524.5	77815	80361.7	73671	78285.9
P08697	SERPINF2	128109	120929	126380	122839	150346	125948
P08708	RPS17	4.46573e+06	4.13997e+06	4.40029e+06	4.79945e+06	5.24895e+06	5.57103e+06
P08727	KRT19	2.15917e+07	2.07628e+07	2.07549e+07	1.58709e+07	16589315	1.85258e+07
P08754	GNAI3	1.3611e+06	1.6031e+06	1.29474e+06	1.20933e+06	1.22231e+06	1.30876e+06
P08758	ANXA5	1.51918e+07	1.48306e+07	1.53553e+07	1.51449e+07	16700175	1.55498e+07
P08833	IGFBP1	1.48583e+06	1.50738e+06	1.37932e+06	555771	481408	468455
P08865	RPSA	1.63217e+07	1.46295e+07	1.57346e+07	1.93211e+07	19858728	2.11695e+07
P08910	ABHD2	5488.47	6008.59	6815.44	14135.6	13910.9	11704.7
P08962	CD63	163685	195207	161076	164661	139171	146597
P09001	MRPL3	429860	404123	415752	428814	418013	451194
P09012	SNRPA	2.04757e+06	2.03535e+06	2.10307e+06	1.9023e+06	2.00599e+06	1.99529e+06
P09016	HOXD4	91296.6	76741.4	88107.7	35475.1	26449.4	38976.7
P09104	ENO2	700044	752577	724379	453236	480344	449124
P09110	ACAA1	789531	803048	770202	979324	983025	944583
P09132	SRP19	615853	538056	536507	652705	694358	687954
P09210	GSTA2	444626	452258	475156	460492	489549	446110
P09234	SNRPC	2.32678e+06	2.16692e+06	2.02461e+06	2.21247e+06	2.35505e+06	2.23571e+06
P09327	VIL1	5.66872e+06	5.61426e+06	5.56029e+06	5.73902e+06	5.91039e+06	5.73494e+06
P09382	LGALS1	7.70147e+06	7.70612e+06	7.06534e+06	6.71699e+06	6322866	6.37099e+06
P09417	QDPR	1.50091e+06	1.51551e+06	1.54419e+06	1.54705e+06	1.59726e+06	1.49213e+06
P09429	HMGB1	1.06889e+07	9.80069e+06	1.08163e+07	1.01257e+07	10333832	1.03154e+07
P09455	RBP1	1.10809e+06	1.13795e+06	1.09154e+06	983413	1.04703e+06	978920
P09493	TPM1	921859	864581	980316	911211	908519	952574
P09496	CLTA	2.96118e+06	3.06328e+06	2.82141e+06	2.98881e+06	3218650	2.82956e+06
P09497	CLTB	640335	698088	611824	645726	655718	560309
P09525	ANXA4	5.46335e+06	5.52899e+06	5.69625e+06	4.85865e+06	5.03303e+06	4.85592e+06
P09543	CNP	2.37752e+06	2.3393e+06	2.34377e+06	3.05488e+06	2.85893e+06	2.97645e+06
P09564	CD7	142755	140353	113757	110349	96237.4	97448.2
P09601	HMOX1	453570	436005	501816	931331	902491	1.10181e+06
P09622	DLD	1.77368e+06	1.65437e+06	1.64117e+06	1.7217e+06	1788620	1.86742e+06
P09651	HNRNPA1	2.90481e+07	2.70465e+07	2.85215e+07	2.95591e+07	31334910	3.1546e+07
P09661	SNRPA1	3.57559e+06	3.3059e+06	3.4786e+06	3.31689e+06	3.28302e+06	3.57453e+06
P09668	CTSH	584858	622045	563853	310923	294635	308165
P09669	COX6C	1.65037e+06	1.57276e+06	1.62355e+06	1.38335e+06	1.29417e+06	1.42735e+06
P09874	PARP1	2.09323e+06	1.97028e+06	2.10404e+06	2.09023e+06	2099963	2.10779e+06
P09884	POLA1	6.83059e+06	6.50301e+06	6.30829e+06	8.07241e+06	7867089	7.86402e+06
P09913	IFIT2	6350.19	8633.59	5199.61	25436.1	24290.7	25271
P09914	IFIT1	97153.3	78510.2	27965.7	1.08639e+06	1.18807e+06	1.13261e+06
P09936	UCHL1	13071.9	12677.3	8955.74	11911.4	9634.06	6398.76
P09960	LTA4H	1.81857e+06	1.79655e+06	1.79277e+06	1.68539e+06	1800470	1.64283e+06
P09972	ALDOC	1.58846e+07	1.66089e+07	1.59645e+07	1.40242e+07	14484944	1.40228e+07
P0C0L4	C4A	712547	723393	669857	947352	847172	918447
P0C0L5	C4B	92515.3	70830.5	88572.2	104943	97306.4	93467.2
P0C0S5	H2AZ1	5.1517e+06	5.269e+06	4.02486e+06	3.51285e+06	3703417	4.05439e+06
P0C1Z6	TFPT	63533.1	52698.7	55053.7	43366	51246.8	42562.5
P0C2W1	FBXO45	46643.7	51964.1	43431.3	17392.6	31494	46927.1
P0C7P0	CISD3	100996	77098.1	102375	101419	92560	105499
P0C7T5	ATXN1L	62441.2	60151.4	72275.2	71545.6	78475.5	55032.8
P0C870	JMJD7	34224.4	31440	31930.1	20214.1	20108.9	19013.8
P0CAP2	POLR2M	107005	126638	103977	105779	123152	91166.8
P0CG12	DERPC	83592.3	98018.6	103428	62478.1	72641.5	83104.4
P0CG13	CHTF8	103706	108649	94131.1	84371.2	96394.1	84415.3
P0CG38	POTEI	2.28376e+06	2.36526e+06	4.34113e+06	3.92878e+06	4293877	3.27412e+06
P0CG41	CTAGE8	11929.5	3108.17	23.4039	12314.8	11921.5	2258.26
P0CJ79	ZNF888	124646	123477	102973	117789	102174	130051
P0DI81	TRAPPC2	78104.7	101342	77560.8	69094.9	76819.9	56066.5
P0DJ07	PET100	288270	341640	264102	508004	516076	552035
P0DJD0	RGPD1	33927.7	30628.1	34759.3	24152.9	23276.4	21779.2
P0DMM9	SULT1A3	3.17443e+06	3.09846e+06	3.1598e+06	3.79633e+06	3.89313e+06	3.48986e+06
P0DMV8	HSPA1A	3.30512e+07	3.24161e+07	3.10018e+07	4.50304e+07	43080012	3.92971e+07
P0DMW3	SMIM10L1	55073.4	51394.8	86365.3	83547.9	95821.8	81713.9
P0DN76	U2AF1L5	3.25703e+06	2.89584e+06	2.67619e+06	3.14211e+06	2.95086e+06	3.42739e+06
P0DN79	CBSL	488856	489944	478193	420797	418082	396743
P0DP23	CALM1	1.3208e+07	1.24606e+07	1.23818e+07	1.33483e+07	14262029	1.41648e+07
P0DP91	ERCC6	49662.6	34244.2	41548.9	38137.6	31320.1	41688
P0DPB6	POLR1D	556279	532590	501090	581669	589641	552311
P0DPD7	EEF1AKMT4	89544.4	81127.9	82636.3	88892.9	90421.1	83492.3
P10109	FDX1	822536	829703	785290	813997	773807	750291
P10114	RAP2A	85445.4	62070.4	55133.4	57102.8	51638.7	42323.7
P10155	RO60	776138	744623	789937	639930	653904	675980
P10176	COX8A	625110	583143	577846	442315	427116	520951
P10253	GAA	1.39197e+06	1.26995e+06	1.31839e+06	932481	978752	904206
P10301	RRAS	213767	207208	206254	81687.7	95606.1	69165.7
P10321	HLA-C	2.86795e+06	3.04489e+06	2.64855e+06	5.76621e+06	5172286	4.70139e+06
P10398	ARAF	79990.4	85667.4	86321.1	75466.8	83734.1	74132.6
P10412	H1-4	7.13806e+06	6.48278e+06	7.69184e+06	7.06331e+06	5316716	7.98287e+06
P10451	SPP1	239446	241992	227369	442409	480531	427899
P10515	DLAT	2.36334e+06	2.15606e+06	2.19126e+06	2.39442e+06	2.31703e+06	2.48927e+06
P10586	PTPRF	317032	313333	314225	237152	255018	256400
P10588	NR2F6	82382	115769	74062.5	103986	110374	103063
P10589	NR2F1	15425.6	10455.6	22719.2	4808.92	9714.55	18248.2
P10599	TXN	2.12946e+07	1.96255e+07	1.97863e+07	2.07946e+07	21760252	1.92586e+07
P10606	COX5B	5.21129e+06	5.16137e+06	4.61691e+06	4.59237e+06	4.56933e+06	4.68609e+06
P10619	CTSA	4.11269e+06	3.7015e+06	3.94985e+06	2.97879e+06	3.03728e+06	2.96425e+06
P10620	MGST1	1.83268e+06	1.71346e+06	1.84989e+06	2.35951e+06	1.95702e+06	2.57815e+06
P10644	PRKAR1A	689768	664887	677220	621142	651244	613304
P10646	TFPI	705203	745827	685535	483656	444462	462932
P10746	UROS	129916	125056	112762	115265	99919.8	91599.7
P10768	ESD	2.14125e+06	2.07226e+06	2.0453e+06	2.47446e+06	2.44537e+06	2.21561e+06
P10809	HSPD1	4.15865e+07	4.01267e+07	3.92116e+07	4.72052e+07	47063012	4.73641e+07
P10909	CLU	221867	258156	201216	231061	212076	223113
P11021	HSPA5	2.10713e+07	1.96899e+07	2.01608e+07	2.51183e+07	23604742	2.55906e+07
P11047	LAMC1	915384	939679	877222	896510	881510	910154
P11117	ACP2	653124	702672	681736	573909	631062	631442
P11142	HSPA8	2.46201e+07	2.35924e+07	2.30883e+07	3.75483e+07	37304820	3.5815e+07
P11166	SLC2A1	9.34078e+06	8.87854e+06	8.91819e+06	9.14323e+06	9189121	1.01199e+07
P11168	SLC2A2	92256.5	83740.7	87872	135560	145694	134311
P11169	SLC2A3	4.28943e+06	4.33748e+06	4.48257e+06	2.70453e+06	2568510	2.66496e+06
P11171	EPB41	447862	456980	443747	427397	418203	409098
P11172	UMPS	2.17344e+06	2.29113e+06	2.23342e+06	2.36029e+06	2.54656e+06	2.44838e+06
P11177	PDHB	2.08475e+06	1.8978e+06	1.83368e+06	1.85593e+06	1.84766e+06	1.94741e+06
P11182	DBT	302600	295301	292158	301309	314818	327948
P11216	PYGB	1.37908e+06	1.33467e+06	1.32537e+06	1.45483e+06	1504217	1.43683e+06
P11217	PYGM	2.61395e+06	2.49762e+06	2.58602e+06	2.62737e+06	2.61227e+06	2.53066e+06
P11226	MBL2	34236.3	4377.95	46751.4	34981.9	38630.1	37871.5
P11233	RALA	554076	619848	603557	554330	592070	582832
P11234	RALB	865303	866628	844007	727775	777740	819741
P11274	BCR	159625	163696	158621	165016	175064	159090
P11277	SPTB	303982	364984	348676	186841	193945	179632
P11279	LAMP1	2.5176e+06	2.60348e+06	2.5127e+06	2.69075e+06	2527711	2.76153e+06
P11310	ACADM	3.12588e+06	3.0794e+06	3.02965e+06	2.95538e+06	2.94885e+06	3.04423e+06
P11362	FGFR1	18641.6	21857.9	8942.01	24173.5	17066.5	18271.9
P11387	TOP1	2.09549e+06	1.69724e+06	2.42583e+06	1.55694e+06	1699600	2.46409e+06
P11388	TOP2A	2.41478e+06	2.18961e+06	2.6351e+06	2.23947e+06	1.99737e+06	2.71096e+06
P11413	G6PD	6.15725e+06	6.17194e+06	6.02196e+06	6.45289e+06	6.61915e+06	6.33772e+06
P11441	UBL4A	548344	519087	548301	591585	601852	592131
P11474	ESRRA	26165.4	32539.5	71354.9	14497.8	22072.4	27624.5
P11498	PC	1.30534e+06	1.29326e+06	1.21773e+06	1.39939e+06	1.35847e+06	1.41739e+06
P11532	DMD	320005	344731	337898	382331	384022	382454
P11586	MTHFD1	3.68736e+06	3.7039e+06	3.54493e+06	4.28692e+06	4.31321e+06	4.1648e+06
P11717	IGF2R	2.61182e+06	2.56894e+06	2.37699e+06	2.18842e+06	2.14515e+06	2.2134e+06
P11766	ADH5	2.73379e+06	2.75794e+06	2.7274e+06	2.98394e+06	2.86374e+06	2.83203e+06
P11802	CDK4	114290	131825	129561	168972	181859	162748
P11908	PRPS2	1.77811e+06	1.87479e+06	1.73531e+06	2.22893e+06	2.22973e+06	2.20799e+06
P11940	PABPC1	1.13105e+07	1.11537e+07	1.12861e+07	1.45334e+07	15468255	1.5194e+07
P12004	PCNA	1.05164e+07	1.11895e+07	9.82929e+06	1.28517e+07	13620093	1.38466e+07
P12074	COX6A1	243810	67965.8	178825	160082	220518	151015
P12081	HARS1	2.66893e+06	2.63286e+06	2.57177e+06	3.07633e+06	3.1456e+06	3.07658e+06
P12235	SLC25A4	1.38626e+06	1.32408e+06	1.3198e+06	1.42775e+06	1.3997e+06	1.37582e+06
P12236	SLC25A6	2.50698e+06	2.52733e+06	2.45372e+06	2.97165e+06	2829025	3.12553e+06
P12259	F5	88118.8	113849	81835.4	98816	82652.2	82279.1
P12268	IMPDH2	3.30012e+06	3.18758e+06	3.13916e+06	3.65464e+06	3617150	3.53602e+06
P12270	TPR	1.3638e+06	1.34336e+06	1.34877e+06	1.30998e+06	1348075	1.29705e+06
P12277	CKB	6.95995e+06	6.32704e+06	6.62324e+06	6.09551e+06	6226082	5.85087e+06
P12429	ANXA3	910220	933752	910751	952310	1.01604e+06	970167
P12532	CKMT1A	260649	301200	273230	173098	192883	147453
P12694	BCKDHA	222677	188152	218433	165766	163914	182977
P12755	SKI	68897.6	60303.4	72227.2	88353.1	26062.6	56047.1
P12757	SKIL	13723	14176.8	12133.2	4994.61	13879.5	11398.1
P12814	ACTN1	5.62775e+06	5.62187e+06	5.36073e+06	5.43185e+06	5.75442e+06	5.49294e+06
P12830	CDH1	297918	323323	327191	261336	253178	251820
P12931	SRC	995528	1.00678e+06	980646	926501	898716	895593
P12955	PEPD	2.4514e+06	2.31736e+06	2.36655e+06	2.46499e+06	2.44384e+06	2.30112e+06
P12956	XRCC6	6.79555e+06	5.90506e+06	6.22407e+06	6.43095e+06	6373128	6.67468e+06
P13010	XRCC5	6.51015e+06	6.13945e+06	6.07684e+06	5.52897e+06	5873240	5.80567e+06
P13051	UNG	174068	146751	174900	268408	283638	282947
P13056	NR2C1	26509.8	24647.2	25975.1	26561.8	19597.7	23208
P13073	COX4I1	3.83884e+06	3.15638e+06	3.68412e+06	3.38066e+06	2.952e+06	3.76428e+06
P13196	ALAS1	347394	328065	349308	280411	318128	289333
P13284	IFI30	267311	236832	268817	230685	187607	192636
P13473	LAMP2	5.18872e+06	5.1622e+06	4.34012e+06	3.94348e+06	3.5062e+06	4.03597e+06
P13489	RNH1	2.1262e+06	2.34855e+06	2.05805e+06	2.44866e+06	2.39866e+06	2.26614e+06
P13498	CYBA	279934	303894	297566	152768	151128	173250
P13639	EEF2	1.16996e+07	1.14648e+07	1.13107e+07	1.5679e+07	15837620	1.55629e+07
P13640	MT1G	278619	179562	203987	614551	761795	573552
P13645	KRT10	741017	389884	778507	552616	313911	532763
P13647	KRT5	81026.3	39455.8	69491.8	42696.5	23998.2	46646.9
P13667	PDIA4	6.60683e+06	6.38128e+06	6.402e+06	7.20081e+06	7094482	7.41191e+06
P13671	C6	22513.8	18511.9	29244.2	39224.2	19855.9	33617.9
P13674	P4HA1	2.18956e+06	2.20876e+06	2.11415e+06	1.51948e+06	1.4031e+06	1.41999e+06
P13688	CEACAM1	769422	859573	718670	896000	882204	845790
P13693	TPT1	2.37928e+06	2.36022e+06	2.13973e+06	3.52109e+06	3.87313e+06	3.65465e+06
P13716	ALAD	388119	382728	374378	379664	397921	362045
P13747	HLA-E	26306.7	36878	19950.6	41738.4	34969.5	42797.4
P13797	PLS3	771314	788670	789527	828326	853036	819801
P13798	APEH	3.0436e+06	3.23482e+06	3.13796e+06	3.19246e+06	3.40409e+06	3.0643e+06
P13804	ETFA	3.88508e+06	3.93547e+06	3.77021e+06	3.32085e+06	3.20727e+06	3.29338e+06
P13807	GYS1	221262	218956	212946	193848	187730	187286
P13861	PRKAR2A	1.23189e+06	1.16559e+06	1.15041e+06	1.07491e+06	1.16136e+06	1.10246e+06
P13929	ENO3	2.73301e+07	3.09635e+07	3.01162e+07	2.50413e+07	25563270	2.31647e+07
P13984	GTF2F2	565423	557144	564394	573078	597268	576258
P13987	CD59	1.64517e+06	1.70118e+06	1.65453e+06	1.51698e+06	1.45419e+06	1.63184e+06
P13994	CCDC130	111923	47990.2	35637	14944.8	62554.6	13186.5
P13995	MTHFD2	2.15461e+06	2.02735e+06	2.16655e+06	2.08812e+06	2.08586e+06	2.22536e+06
P14174	MIF	2.84192e+07	3.29601e+07	2.97637e+07	3.18429e+07	29641260	3.16289e+07
P14209	CD99	1.05085e+06	935926	1.03258e+06	731163	698354	782579
P14314	PRKCSH	4.18078e+06	4.30037e+06	4.18806e+06	4.60807e+06	4517426	4.68989e+06
P14316	IRF2	100022	67818.8	109298	101528	110112	78100.3
P14324	FDPS	1.79236e+06	1.78564e+06	1.72126e+06	1.93309e+06	2.08185e+06	1.89316e+06
P14373	TRIM27	632908	629930	637359	625003	635972	602110
P14406	COX7A2	3.14611e+06	2.72434e+06	2.99901e+06	2.51011e+06	2.52351e+06	2.64826e+06
P14543	NID1	104036	116068	108591	168902	150802	170243
P14550	AKR1A1	4.96484e+06	4.54786e+06	4.84715e+06	4.96347e+06	5147528	4.832e+06
P14555	PLA2G2A	544613	605906	475217	276710	326806	286472
P14618	PKM	2.237e+07	2.17656e+07	2.2035e+07	2.35859e+07	23526190	2.34875e+07
P14621	ACYP2	141041	156602	145755	195571	217633	185213
P14625	HSP90B1	1.21211e+07	1.14244e+07	1.15221e+07	1.39159e+07	13198375	1.42235e+07
P14635	CCNB1	384440	388252	337844	392149	417355	390790
P14649	MYL6B	4.65466e+06	4.31684e+06	4.12201e+06	3.7776e+06	4.05466e+06	3.67369e+06
P14672	SLC2A4	72282	47642.2	62399.9	44868.9	43351.1	49421
P14678	SNRPB	6.33987e+06	5.77184e+06	6.17051e+06	6.14205e+06	6.00899e+06	6.43777e+06
P14735	IDE	1.47185e+06	1.46035e+06	1.51894e+06	1.84674e+06	1.92609e+06	1.79733e+06
P14854	COX6B1	4.03952e+06	4.0975e+06	3.93124e+06	3.58436e+06	3.50976e+06	3.28898e+06
P14859	POU2F1	192426	209237	198098	164818	162742	147284
P14866	HNRNPL	4.05805e+06	3.9642e+06	3.84774e+06	3.60666e+06	3.73564e+06	3.7997e+06
P14868	DARS1	3.17512e+06	3.08059e+06	3.1544e+06	3.14795e+06	3.4023e+06	3.30969e+06
P14923	JUP	692709	681780	650802	489431	503910	511841
P14927	UQCRB	2.05083e+06	1.88016e+06	1.90462e+06	1.6528e+06	1.66363e+06	1.59253e+06
P15056	BRAF	23233	25965.9	29390.5	6000.23	23152.1	23208.4
P15104	GLUL	334833	347012	335206	446609	458807	458941
P15121	AKR1B1	3.00064e+06	2.93525e+06	3.03986e+06	3.33173e+06	3240645	3.31783e+06
P15144	ANPEP	1.31138e+06	1.40992e+06	1.26579e+06	1.5709e+06	1.69125e+06	1.64737e+06
P15151	PVR	398263	415425	399054	419023	426304	431310
P15170	GSPT1	2.55911e+06	2.52855e+06	2.41386e+06	3.0305e+06	3.04179e+06	2.93912e+06
P15260	IFNGR1	134317	138545	126460	226148	221764	256354
P15289	ARSA	579210	523867	531502	385548	387128	360851
P15291	B4GALT1	222174	196648	225277	209920	222576	225655
P15311	EZR	2.62241e+06	2.65688e+06	2.59051e+06	2.76942e+06	2.80913e+06	2.70552e+06
P15336	ATF2	122576	126440	111351	108977	114715	99773.2
P15374	UCHL3	748092	741043	734049	668361	731908	658989
P15391	CD19	44208.4	43738.9	39878.4	6398.47	13942.4	48501.2
P15407	FOSL1	44570.5	35745.5	34656.6	35954.5	40150.6	45291.6
P15529	CD46	436522	447729	448856	545952	482120	542048
P15531	NME1	1.00994e+07	9.51521e+06	1.00571e+07	1.13472e+07	12130677	1.09751e+07
P15559	NQO1	1.93646e+07	1.94039e+07	1.80878e+07	2.07483e+07	22894898	2.27965e+07
P15586	GNS	1.53215e+06	1.44107e+06	1.51388e+06	1.22303e+06	1.17887e+06	1.2268e+06
P15735	PHKG2	180938	172802	177102	205357	204983	209593
P15822	HIVEP1	26995.5	22508.7	37703.4	45625.4	39259.5	47850.8
P15848	ARSB	686541	636711	674073	519100	517474	525559
P15880	RPS2	1.04069e+07	1.0177e+07	9.71125e+06	1.25729e+07	12602947	1.33234e+07
P15882	CHN1	128548	101230	141809	115309	109505	105463
P15907	ST6GAL1	366464	385553	386621	532603	514472	539443
P15923	TCF3	65011.7	74344.5	75670.5	74682.3	67419.8	67449.1
P15924	DSP	2.59246e+06	2.55988e+06	2.42962e+06	2.11755e+06	2.11035e+06	2.05994e+06
P15927	RPA2	535165	565136	513261	608704	534805	554503
P15954	COX7C	535584	480298	524410	408866	399120	316605
P16083	NQO2	339080	330819	312859	322129	336478	285092
P16104	H2AX	1.61086e+06	1.60271e+06	1.82374e+06	1.82569e+06	1.39886e+06	1.91225e+06
P16144	ITGB4	318592	327834	326906	264180	267601	267393
P16152	CBR1	4.29601e+06	4.39544e+06	4.29666e+06	4.52209e+06	4.6838e+06	4.47581e+06
P16157	ANK1	47749.2	37947.2	44524	50466.1	40887.9	49988.8
P16219	ACADS	893181	852118	822712	792876	813862	837236
P16220	CREB1	210366	191527	202783	198937	196161	191693
P16260	SLC25A16	94832.3	84004.7	91564.4	94785	95313.2	110703
P16278	GLB1	667147	660115	648184	451122	465317	468103
P16298	PPP3CB	687863	694383	732575	648688	690828	679440
P16333	NCK1	220697	245845	227045	283007	290171	266307
P16383	GCFC2	281081	252508	302920	303369	298939	290512
P16401	H1-5	6.97289e+06	5.54033e+06	7.26869e+06	4.59074e+06	5.43659e+06	7.4092e+06
P16402	H1-3	2.01127e+06	42883.7	263521	75281.6	199789	100183
P16403	H1-2	2.73969e+07	2.21325e+07	2.86243e+07	2.40205e+07	25498396	3.2692e+07
P16422	EPCAM	1.42894e+06	1.38046e+06	1.38206e+06	1.55165e+06	1.44462e+06	1.49309e+06
P16435	POR	2.22767e+06	2.10736e+06	2.36232e+06	2.2428e+06	1.85707e+06	2.58251e+06
P16444	DPEP1	567979	566461	560360	515376	499516	495972
P16455	MGMT	348284	324312	314245	360432	358586	338488
P16591	FER	154168	161251	154840	141009	156277	135325
P16615	ATP2A2	7.48963e+06	7.2776e+06	8.15436e+06	7.5508e+06	6.43005e+06	9.11972e+06
P16662	UGT2B7	255433	232442	288781	260644	226291	325270
P16870	CPE	241765	255366	229587	195807	170394	189911
P16930	FAH	1.89256e+06	1.71e+06	1.79042e+06	1.95585e+06	1.99451e+06	1.96209e+06
P16949	STMN1	5.33255e+06	5.08842e+06	5.17669e+06	5.48429e+06	5959328	5.40516e+06
P16989	YBX3	971946	900635	970682	923377	988727	950587
P17028	ZNF24	137408	135914	145757	152663	157965	161789
P17029	ZKSCAN1	99877.3	92463	100844	76270.9	65928	88635.5
P17036	ZNF3	11916.9	11370.2	10146.6	17618.2	16956.8	19839.3
P17039	ZNF30	13752.2	6399.47	12424.9	19094.2	15820.3	17798.9
P17050	NAGA	335156	325648	319634	201289	202918	205634
P17096	HMGA1	1.16709e+07	1.11809e+07	1.2124e+07	1.00135e+07	9796445	1.15789e+07
P17152	TMEM11	323794	333567	319284	311040	312211	328122
P17174	GOT1	6.51584e+06	6.20808e+06	6.66436e+06	6.09237e+06	6390510	5.87115e+06
P17252	PRKCA	406633	393257	379825	406516	387934	367323
P17275	JUNB	51104.7	32401.2	51115.9	89733.5	28809.5	92717
P17301	ITGA2	1.46215e+06	1.46085e+06	1.41082e+06	1.20104e+06	1.0898e+06	1.19336e+06
P17480	UBTF	686053	703207	722291	936529	958299	976206
P17516	AKR1C4	69055.4	85262.1	55294.6	50484.9	50628.6	47128.9
P17535	JUND	52293	55050.3	47001.7	49042.1	52306.3	48988.1
P17544	ATF7	48128.4	37313.2	42364.5	56455.2	55345.2	54931.9
P17568	NDUFB7	493406	434876	437207	433023	403780	471479
P17612	PRKACA	459107	448600	482751	431441	396968	447652
P17655	CAPN2	267497	289783	266356	285696	284014	281175
P17676	CEBPB	233134	213968	239564	167661	197839	169329
P17706	PTPN2	301245	289965	325982	338270	351587	362519
P17707	AMD1	72438.7	74065.2	100098	89504.7	98445.7	88487
P17812	CTPS1	1.51405e+06	1.50575e+06	1.48324e+06	1.91143e+06	1.96202e+06	1.88695e+06
P17813	ENG	122427	135157	119234	161106	136287	145054
P17844	DDX5	7.70865e+06	7.60418e+06	7.34133e+06	1.04713e+07	11006733	1.12553e+07
P17858	PFKL	1.11778e+06	1.06946e+06	1.09614e+06	1.07237e+06	1.06763e+06	1.02372e+06
P17900	GM2A	184564	169465	161713	177526	171652	165045
P17931	LGALS3	2.23287e+06	2.18179e+06	2.30472e+06	2.73558e+06	2.81025e+06	2.70825e+06
P17980	PSMC3	2.34488e+06	2.28062e+06	2.24909e+06	2.54261e+06	2.67311e+06	2.55358e+06
P17987	TCP1	4.47336e+06	4.53199e+06	4.32092e+06	5.12804e+06	5.33657e+06	5.16701e+06
P18031	PTPN1	763503	713112	841408	731670	670910	805579
P18074	ERCC2	354418	357802	350678	311246	328135	310386
P18077	RPL35A	6.68681e+06	6.45333e+06	6.32964e+06	7.56217e+06	8376964	8.70895e+06
P18084	ITGB5	739077	791720	669668	777635	741538	859351
P18085	ARF4	4.81888e+06	4.97303e+06	5.02831e+06	5.23115e+06	5574191	5.30281e+06
P18124	RPL7	6.33091e+06	7.25116e+06	4.93358e+06	9.77277e+06	10745110	8.10952e+06
P18206	VCL	1.21725e+06	1.27649e+06	1.19178e+06	1.44042e+06	1.50274e+06	1.44028e+06
P18283	GPX2	472329	448867	501769	442714	482638	374608
P18433	PTPRA	192254	192086	197201	184086	186416	193336
P18440	NAT1	49088.9	50565.4	62744.2	67592.6	67824	61628.3
P18510	IL1RN	63678	42512.4	48636.4	56200.7	82789	55626.5
P18583	SON	895921	895390	885855	1.00734e+06	1031101	1.01278e+06
P18615	NELFE	285450	277386	256528	260926	279967	249957
P18621	RPL17	8.70175e+06	7.89699e+06	8.28029e+06	9.45081e+06	10311734	1.06204e+07
P18669	PGAM1	1.0364e+07	1.05728e+07	9.64937e+06	1.02656e+07	10817504	9.49662e+06
P18754	RCC1	3.15567e+06	3.10268e+06	3.07325e+06	2.92062e+06	2908342	3.06341e+06
P18827	SDC1	152623	166995	146034	143297	151706	154515
P18846	ATF1	102294	145463	126730	140744	113172	80603.1
P18850	ATF6	16917.4	34343	16658.4	15746.1	13320.9	18632.7
P18858	LIG1	982717	941076	962532	1.29005e+06	1.33089e+06	1.26794e+06
P18859	ATP5PF	1.34725e+06	1.39213e+06	1.3197e+06	1.19632e+06	1.18374e+06	1.21829e+06
P18887	XRCC1	1.02369e+06	969180	976392	911022	931467	935769
P19022	CDH2	148644	148042	135224	154125	149009	145043
P19086	GNAZ	18320.8	50705.2	19363.5	14201.3	27566.4	5939.17
P19099	CYP11B2	1.03946e+06	843439	1.0227e+06	906969	1036448	920225
P19174	PLCG1	301620	316013	301938	312726	318832	304391
P19224	UGT1A6	18328	22083.3	20842.8	9206.77	10050.8	17642.5
P19256	CD58	132724	138836	120088	118842	116752	104774
P19338	NCL	3.22294e+07	3.04585e+07	3.1609e+07	3.2104e+07	32312878	3.21764e+07
P19367	HK1	192872	99958.4	122559	12241.7	15810.3	13760.4
P19387	POLR2C	1.04338e+06	1.10257e+06	1.01517e+06	925227	934746	978891
P19388	POLR2E	838512	812347	810564	860941	866534	877108
P19404	NDUFV2	1.15814e+06	1.14227e+06	1.08924e+06	1.01077e+06	1.05681e+06	1.12687e+06
P19438	TNFRSF1A	30860.7	30829.7	31787.9	31579.2	35536.6	36109.4
P19440	GGT1	1.05383e+06	1.20135e+06	1.03051e+06	903268	958347	891520
P19447	ERCC3	175454	173279	166963	150255	154127	155316
P19474	TRIM21	86085.2	116740	88745.6	439728	463982	441798
P19525	EIF2AK2	631333	944293	641149	1.61099e+06	1.61301e+06	1.53161e+06
P19532	TFE3	53043	17546.4	13773.3	11353.2	12974.5	5265.63
P19623	SRM	2.59203e+06	2.63791e+06	2.61416e+06	3.51644e+06	3.55402e+06	3.42919e+06
P19634	SLC9A1	30033.7	32814.9	32444.5	30278.5	24148.3	21440.5
P19652	ORM2	592013	641142	552690	950361	956978	909808
P19784	CSNK2A2	866487	879438	875466	1.01113e+06	1.0829e+06	1.03358e+06
P19793	RXRA	103573	107807	90259.1	100556	99156.6	99160
P19823	ITIH2	828644	757722	814754	1.09582e+06	1.03335e+06	1.08523e+06
P19838	NFKB1	260726	240070	263268	302962	318215	298726
P19883	FST	22009.4	19263	20830.1	14320.6	12577	11308.3
P19971	TYMP	522508	622236	505901	658799	737884	561050
P20020	ATP2B1	652208	666619	633625	559777	587617	587724
P20042	EIF2S2	3.98091e+06	4.01834e+06	3.81132e+06	4.51139e+06	4.76801e+06	4.63388e+06
P20073	ANXA7	2.90798e+06	2.88915e+06	2.81713e+06	2.87627e+06	3.14779e+06	2.92062e+06
P20142	PGC	247922	206220	247460	185589	195142	183414
P20226	TBP	93030.3	107549	82294	93698.9	96809.3	101317
P20248	CCNA2	386070	461618	436408	484930	593524	515120
P20290	BTF3	1.53791e+06	1.68392e+06	1.52896e+06	1.93429e+06	1.80234e+06	1.87526e+06
P20336	RAB3A	54391.2	52021.6	57839.4	29380.4	33399.2	30023.9
P20337	RAB3B	164032	160177	149855	93648.8	81057.3	120617
P20338	RAB4A	256948	248301	272371	345230	349701	380325
P20339	RAB5A	363847	375940	296959	266042	271158	253132
P20340	RAB6A	1.47618e+06	1.51498e+06	1.51313e+06	1.32124e+06	1.24386e+06	1.3697e+06
P20585	MSH3	114459	104700	109533	112690	113669	120510
P20591	MX1	70489.9	212269	110003	877516	991135	867491
P20592	MX2	15006.8	49825.2	10426.1	456903	502965	457573
P20618	PSMB1	4.85969e+06	4.60552e+06	4.57305e+06	5.11626e+06	5.40124e+06	5.58846e+06
P20645	M6PR	980245	1.15963e+06	920360	984581	963777	1.01737e+06
P20674	COX5A	3.61481e+06	3.55475e+06	3.67003e+06	3.51954e+06	3.44123e+06	3.54658e+06
P20700	LMNB1	4.60244e+06	4.40868e+06	4.42984e+06	4.32965e+06	4.30719e+06	4.55373e+06
P20711	DDC	65794.7	65429.1	64609.2	79301.7	69090	70192.8
P20742	PZP	11608.4	10114.1	9753.45	71302.2	24782.4	18290.8
P20783	NTF3	1.23324e+06	1.28439e+06	1.25892e+06	1.2261e+06	1.12909e+06	1.18241e+06
P20810	CAST	581873	567892	549408	574450	595029	529258
P20823	HNF1A	182653	181661	171078	204009	230693	217286
P20839	IMPDH1	445980	456260	436850	458797	452347	447351
P20851	C4BPB	37240.2	18211.1	35739.9	34578.2	23291.2	33035
P20933	AGA	291564	307019	266936	151789	122542	136999
P20936	RASA1	85765.4	89571.7	91144.5	97583.7	97517.3	93550.4
P20962	PTMS	1.63487e+06	1.88665e+06	1.77859e+06	1.15935e+06	1.22324e+06	1.07984e+06
P21127	CDK11B	989461	961082	967006	907274	975672	932471
P21266	GSTM3	1.09898e+06	1.15306e+06	1.04491e+06	930442	1.02312e+06	918331
P21281	ATP6V1B2	1.47665e+06	1.49521e+06	1.48254e+06	1.45035e+06	1.50377e+06	1.46846e+06
P21283	ATP6V1C1	737250	766667	726696	742927	734542	724654
P21291	CSRP1	710037	720922	710301	827492	870596	782844
P21333	FLNA	8.64093e+06	8.62077e+06	8.13447e+06	8.46543e+06	8845380	8.49911e+06
P21397	MAOA	236122	189935	226373	203643	200482	212748
P21399	ACO1	636546	588664	637714	577484	573244	547086
P21439	ABCB4	600870	540006	620171	654677	620912	641874
P21549	AGXT	73960.5	78915.5	76638.5	98021.3	85328.4	100542
P21580	TNFAIP3	99785.2	100965	102485	78923.7	82028.3	83814
P21589	NT5E	370310	337741	358348	307952	311493	310744
P21675	TAF1	126922	112302	125797	148750	137872	153933
P21695	GPD1	1.26009e+06	1.19296e+06	1.23189e+06	1.25697e+06	1.3203e+06	1.19602e+06
P21741	MDK	84703	87195.9	76118.8	56481.8	68915.2	59714.8
P21796	VDAC1	1.28157e+07	1.19177e+07	1.25846e+07	1.16119e+07	10227632	1.27379e+07
P21817	RYR1	293665	253407	207660	262130	337380	362635
P21860	ERBB3	118935	128798	115784	119686	102829	121197
P21912	SDHB	2.04116e+06	1.92703e+06	2.05736e+06	1.60519e+06	1.58625e+06	1.58887e+06
P21926	CD9	201976	194386	185301	120260	116543	128334
P21953	BCKDHB	271843	271671	311515	245550	268806	263412
P21964	COMT	4.04557e+06	3.60956e+06	3.95409e+06	3.8376e+06	3.70442e+06	3.97175e+06
P21980	TGM2	1.1994e+06	1.22697e+06	1.12701e+06	1.22031e+06	1.24114e+06	1.20226e+06
P22033	MMUT	365357	351235	361741	391036	408407	420506
P22059	OSBP	688905	670664	663583	645368	652529	651936
P22061	PCMT1	2.62926e+06	2.57738e+06	2.71401e+06	2.4842e+06	2.65104e+06	2.45163e+06
P22087	FBL	7.4818e+06	6.85731e+06	7.4157e+06	7.31395e+06	7077777	7.77926e+06
P22090	RPS4Y1	2.08225e+06	2.09322e+06	1.98488e+06	2.41994e+06	2.49219e+06	2.7416e+06
P22102	GART	2.31386e+06	2.41768e+06	2.38071e+06	2.46574e+06	2513605	2.46277e+06
P22234	PAICS	7.18271e+06	6.7669e+06	6.90541e+06	7.42469e+06	7666156	7.06047e+06
P22307	SCP2	3.64691e+06	3.66703e+06	3.63453e+06	3.1654e+06	3.13186e+06	3.1926e+06
P22309	UGT1A1	75581.7	67757.2	83277.4	96646.9	71612.3	109119
P22314	UBA1	5.51165e+06	5.46312e+06	5.46966e+06	5.41666e+06	5497697	5.28772e+06
P22392	NME2	2.8158e+07	2.68239e+07	2.80277e+07	3.52012e+07	36522148	3.26875e+07
P22413	ENPP1	336221	325640	344654	291875	286726	309800
P22415	USF1	91953.3	75391.8	81133.8	111533	96376.2	105048
P22455	FGFR4	206333	174620	212119	304933	299801	290036
P22570	FDXR	6.46382e+06	6.17985e+06	6.16238e+06	5.80632e+06	5.84495e+06	5.74702e+06
P22626	HNRNPA2B1	3.29713e+07	3.10129e+07	2.88215e+07	2.98573e+07	31609520	3.1834e+07
P22670	RFX1	89405.9	83654	102289	106507	108455	100450
P22681	CBL	183006	214925	173737	155936	156668	148412
P22692	IGFBP4	17960	14615.8	16605	5362.23	10124.6	8484.58
P22694	PRKACB	70794.9	21968.5	74960.8	46735.2	60273.4	49365
P22695	UQCRC2	3.00594e+06	2.88406e+06	2.92335e+06	2.93351e+06	2883262	3.02889e+06
P22792	CPN2	42136.7	32600.4	35038.9	67418.5	71264.2	73735.7
P22830	FECH	408714	384933	383053	317941	326231	326200
P23141	CES1	3.17527e+06	3.10104e+06	3.02614e+06	3.2002e+06	3087335	3.22235e+06
P23142	FBLN1	130918	119897	104763	90251.5	92378.4	84009.1
P23193	TCEA1	2.3157e+06	2.33177e+06	2.21467e+06	2.08695e+06	2.11402e+06	2.01075e+06
P23229	ITGA6	387911	369711	371079	416584	421905	433481
P23246	SFPQ	8.48895e+06	7.83747e+06	8.23039e+06	9.35911e+06	9687544	9.86833e+06
P23258	TUBG1	996368	1.01841e+06	986042	1.10757e+06	1.16096e+06	1.07832e+06
P23284	PPIB	1.67615e+07	1.56835e+07	1.56325e+07	1.90064e+07	18578316	1.9591e+07
P23297	S100A1	1.82375e+06	2.4345e+06	1.76883e+06	1.5888e+06	1.98295e+06	1.58075e+06
P23368	ME2	772788	820317	746227	723960	769349	719479
P23378	GLDC	789776	765853	737819	868961	846355	856001
P23381	WARS1	1.64845e+06	1.62655e+06	1.56201e+06	1.8318e+06	1.97494e+06	1.82278e+06
P23396	RPS3	1.84261e+07	1.667e+07	1.67658e+07	2.14226e+07	22559388	2.29798e+07
P23434	GCSH	638321	522889	611235	574991	624853	560680
P23443	RPS6KB1	253940	186596	246519	148495	103005	174744
P23458	JAK1	219363	215903	214163	244129	234813	234079
P23468	PTPRD	175547	186898	205096	154281	183477	173390
P23470	PTPRG	65227.6	66768.8	69821.2	65151.5	65288.8	55883.9
P23497	SP100	95792.4	174586	90183.8	278744	327376	273160
P23511	NFYA	101053	86449.6	97008.3	121153	127777	98261.8
P23526	AHCY	9.27317e+06	9.01081e+06	9.16781e+06	1.04531e+07	10737414	1.05253e+07
P23528	CFL1	3.25168e+07	3.06204e+07	3.08618e+07	3.30901e+07	32770206	3.4014e+07
P23588	EIF4B	3.23646e+06	3.17672e+06	3.19888e+06	3.69201e+06	3.95679e+06	3.54813e+06
P23610	F8A1	119404	95005.1	108252	93493.8	90269.7	88339.6
P23634	ATP2B4	5.15849e+07	5.58751e+07	5.27687e+07	4.73263e+07	47001948	4.713e+07
P23677	ITPKA	213625	227539	211257	289425	317764	280789
P23743	DGKA	20531.6	22479.5	19851	14163.4	16311.2	9970.95
P23786	CPT2	435966	444271	412069	381200	384334	404662
P23919	DTYMK	1.2642e+06	1.25017e+06	1.27565e+06	1.39515e+06	1.42019e+06	1.39255e+06
P23921	RRM1	573067	576505	560579	755486	773667	725289
P24001	IL32	30898.7	34366.3	42082.3	71480.5	78806.9	68850.6
P24043	LAMA2	5.93868e+06	7.4561e+06	7.40941e+06	6.03859e+06	4.9299e+06	5.0928e+06
P24311	COX7B	291884	369657	383449	409163	314478	408458
P24385	CCND1	88171.2	113682	91499.3	117624	91673.5	102460
P24386	CHM	136895	164525	119028	128548	167817	144193
P24390	KDELR1	278513	265772	268770	200627	200919	255193
P24534	EEF1B2	8.03064e+06	8.10199e+06	7.48722e+06	9.59402e+06	10631979	9.47914e+06
P24539	ATP5PB	2.54065e+06	2.25466e+06	2.6027e+06	2.48018e+06	2.26567e+06	2.83903e+06
P24666	ACP1	3.67162e+06	3.56063e+06	3.49917e+06	3.67946e+06	3.85778e+06	3.42898e+06
P24752	ACAT1	4.49166e+06	4.51371e+06	4.29961e+06	4.25589e+06	4.10587e+06	4.30847e+06
P24844	MYL9	53883	53449.2	45621.1	83309.1	75936.9	72684
P24863	CCNC	68093.2	97368.4	57239.4	40815.8	10916.2	26056.5
P24864	CCNE1	12637.8	30195.2	23454.6	49517.9	18702.4	23406
P24928	POLR2A	559988	561552	557034	588700	606558	602143
P24941	CDK2	697689	681188	684409	786919	846098	735582
P25054	APC	64881.2	69690.6	74650.1	67188	72172.6	64452.3
P25098	GRK2	165402	161700	165045	181535	193468	178907
P25205	MCM3	3.19481e+06	3.21039e+06	3.00379e+06	3.77964e+06	3748889	3.80754e+06
P25208	NFYB	249889	256313	226093	223918	227920	250848
P25311	AZGP1	146534	97123.9	150158	63437.5	61492.1	75677.7
P25325	MPST	1.26238e+06	1.1976e+06	1.208e+06	1.20926e+06	1.22909e+06	1.17041e+06
P25398	RPS12	8.77203e+06	8.81648e+06	8.25436e+06	1.12869e+07	10851904	1.10907e+07
P25440	BRD2	408846	418877	441169	374391	385224	372694
P25445	FAS	187969	198888	185907	217080	214777	242002
P25490	YY1	515673	453440	565792	610103	534134	610124
P25685	DNAJB1	2.3922e+06	2.32738e+06	2.36571e+06	3.00068e+06	3.03356e+06	2.74947e+06
P25686	DNAJB2	110462	130633	93938.6	109314	109780	87388.5
P25705	ATP5F1A	1.96459e+07	1.90814e+07	1.92353e+07	1.90745e+07	19056544	2.0029e+07
P25786	PSMA1	5.24232e+06	5.20317e+06	4.94374e+06	5.34431e+06	5500380	5.33619e+06
P25787	PSMA2	3.68744e+06	3.66686e+06	3.59625e+06	4.00714e+06	3.98809e+06	4.22592e+06
P25788	PSMA3	3.64976e+06	3.51429e+06	3.65205e+06	4.10025e+06	4.12135e+06	4.18422e+06
P25789	PSMA4	4.02933e+06	3.75529e+06	3.76285e+06	4.24776e+06	4206310	4.1272e+06
P25815	S100P	1.22568e+07	1.40227e+07	1.10987e+07	8.57362e+06	8860584	8.40045e+06
P25942	CD40	97313.9	178782	92015.1	133061	108823	112489
P25963	NFKBIA	147702	139964	158461	169068	176100	129834
P26045	PTPN3	50204.6	57396	60625.1	45221.7	38695.3	39658.3
P26196	DDX6	1.67674e+06	1.66743e+06	1.74106e+06	1.87641e+06	1.98589e+06	1.98502e+06
P26358	DNMT1	629199	547864	660063	714059	640124	819829
P26368	U2AF2	3.30795e+06	3.08511e+06	3.03198e+06	3.28275e+06	3.43866e+06	3.26917e+06
P26373	RPL13	1.35949e+07	1.31229e+07	1.28174e+07	1.5588e+07	15506600	1.63291e+07
P26374	CHML	23906.6	29611.1	16041.1	16873.1	22717.7	18556.4
P26440	IVD	1.56667e+06	1.59839e+06	1.5625e+06	1.59175e+06	1564581	1.57709e+06
P26447	S100A4	318704	340626	245431	141521	168382	135548
P26572	MGAT1	391234	404230	397307	418615	429614	423087
P26583	HMGB2	3.81594e+06	3.30485e+06	3.79816e+06	3.41887e+06	3384768	3.51046e+06
P26599	PTBP1	3.73438e+06	3.5875e+06	3.60675e+06	3.71163e+06	3.74873e+06	4.02319e+06
P26639	TARS1	1.76426e+06	1.70426e+06	1.74225e+06	1.85659e+06	1.96757e+06	1.81691e+06
P26640	VARS1	2.81497e+06	2.83397e+06	2.84543e+06	2.9246e+06	3.1095e+06	2.936e+06
P26641	EEF1G	8.15207e+06	7.74441e+06	7.68007e+06	9.5262e+06	10252762	9.78998e+06
P26885	FKBP2	1.63602e+06	1.66687e+06	1.50293e+06	1.65688e+06	1.73443e+06	1.65758e+06
P26927	MST1	54843.7	51632.6	47972	55736.2	47050	48486.5
P27105	STOM	3.72232e+06	3.87299e+06	3.65893e+06	2.77596e+06	2.9175e+06	3.09305e+06
P27144	AK4	2.85274e+06	2.76898e+06	2.83117e+06	2.98009e+06	3.02632e+06	3.01533e+06
P27338	MAOB	715457	701815	730460	810509	788460	812996
P27348	YWHAQ	8.21938e+06	8.21614e+06	7.49668e+06	8.21332e+06	9090096	8.77772e+06
P27361	MAPK3	688392	676159	655282	550230	575098	577967
P27448	MARK3	4.15093e+06	3.61136e+06	3.71654e+06	3.92319e+06	3.74624e+06	3.91399e+06
P27449	ATP6V0C	189133	252408	215613	151593	199686	160783
P27540	ARNT	49336.8	48000.6	34793.9	31966.3	36697.8	33488.6
P27635	RPL10	8.75952e+06	8.28489e+06	7.87799e+06	1.04203e+07	10641120	1.07019e+07
P27694	RPA1	717357	731507	715038	687813	756359	687463
P27695	APEX1	7.97873e+06	7.82049e+06	7.28126e+06	6.9488e+06	6593342	6.41084e+06
P27707	DCK	486779	499580	511359	470220	517877	444382
P27708	CAD	1.36501e+06	1.36199e+06	1.33765e+06	1.416e+06	1.46724e+06	1.37268e+06
P27797	CALR	1.65833e+07	1.72095e+07	1.61467e+07	1.86739e+07	18565268	1.84255e+07
P27816	MAP4	1.99735e+06	1.80761e+06	2.04815e+06	1.95706e+06	1.85254e+06	2.07195e+06
P27824	CANX	7.54978e+06	6.78435e+06	8.41748e+06	7.1293e+06	6143417	8.44906e+06
P27986	PIK3R1	122003	107441	119584	134167	130788	125075
P28062	PSMB8	203677	255755	198028	437499	457932	417667
P28065	PSMB9	130524	193228	141849	497570	464618	447215
P28066	PSMA5	4.18531e+06	4.31062e+06	4.02671e+06	4.48536e+06	4437736	4.26297e+06
P28070	PSMB4	2.28791e+06	2.53236e+06	2.2047e+06	2.50245e+06	2.74601e+06	2.54924e+06
P28072	PSMB6	3.37785e+06	3.391e+06	3.16851e+06	3.33778e+06	3.67143e+06	3.29589e+06
P28074	PSMB5	3.57981e+06	3.49552e+06	3.52832e+06	3.45727e+06	3.67478e+06	3.51519e+06
P28161	GSTM2	612155	645729	631085	619702	633108	592276
P28288	ABCD3	1.30729e+06	1.29483e+06	1.32138e+06	1.42508e+06	1.30208e+06	1.49312e+06
P28290	ITPRID2	167229	193447	170491	156155	182268	157379
P28300	LOX	147563	154965	149228	75795.2	65936.3	66572.8
P28331	NDUFS1	2.08962e+06	2.063e+06	2.02347e+06	1.79182e+06	1.77429e+06	1.86851e+06
P28332	ADH6	931525	926713	961699	1.10021e+06	1.11034e+06	1.09034e+06
P28340	POLD1	538522	566569	549389	589308	609156	591431
P28347	TEAD1	36215.1	32493.6	24710.1	18108.7	20422	17992.5
P28370	SMARCA1	582565	569106	601787	512383	512561	538709
P28482	MAPK1	2.48612e+06	2.54434e+06	2.55512e+06	2.68011e+06	2.7273e+06	2.6711e+06
P28676	GCA	539591	555069	544819	508732	505785	469997
P28702	RXRB	72440.7	75675.9	87601.8	90562.5	84566.2	77797
P28715	ERCC5	77582.6	97092.1	82101.3	65264.9	77075.1	65000.2
P28749	RBL1	65678.9	79201.6	70208.3	73385.7	84468	77933.7
P28799	GRN	904958	914544	760907	1.01189e+06	921854	948618
P28827	PTPRM	152509	109207	134874	56431.9	56660.8	41439.4
P28838	LAP3	2.59831e+06	3.11608e+06	2.4573e+06	2.61349e+06	3.3022e+06	3.51379e+06
P29083	GTF2E1	302342	286884	271331	262246	271921	282195
P29084	GTF2E2	229796	226336	268564	237979	223774	243829
P29144	TPP2	569642	557106	543591	674104	681111	647875
P29218	IMPA1	919275	932160	934808	976660	936898	937425
P29279	CCN2	219197	213839	203667	115341	113581	121551
P29317	EPHA2	814296	852903	844615	928446	904632	918711
P29350	PTPN6	213249	211542	195969	177031	200475	190009
P29353	SHC1	148409	144309	153861	147184	166849	139418
P29372	MPG	535909	476629	503106	470251	450044	459517
P29373	CRABP2	82541.9	94280.7	74052.3	8479.9	3480.39	20970
P29374	ARID4A	221932	240101	211565	201473	202515	179394
P29375	KDM5A	19606.7	9462.58	14050.4	5331.89	5608.7	8423.71
P29401	TKT	1.33637e+07	1.26112e+07	1.2318e+07	1.31469e+07	14033443	1.35946e+07
P29474	NOS3	222226	224477	190148	204560	184677	216025
P29558	RBMS1	307717	315281	317835	303083	285770	314601
P29590	PML	331357	465720	303590	969256	997983	947626
P29692	EEF1D	8.48657e+06	8.7086e+06	8.39092e+06	1.00643e+07	10543633	1.0699e+07
P29728	OAS2	177739	135920	122525	663118	644780	681417
P29966	MARCKS	3.61204e+06	3.71087e+06	3.44365e+06	2.47367e+06	2.70415e+06	2.76963e+06
P29992	GNA11	503945	553731	510163	465832	470696	433901
P30038	ALDH4A1	4.53738e+06	4.61804e+06	4.46938e+06	4.83427e+06	4.65707e+06	4.84952e+06
P30039	PBLD	47504.7	49300.8	54211	45057.5	40106.4	49790.7
P30040	ERP29	7.2176e+06	6.69934e+06	7.07715e+06	7.29834e+06	7464590	7.39376e+06
P30041	PRDX6	9.29597e+06	9.25217e+06	9.3927e+06	1.02786e+07	10281397	1.00494e+07
P30043	BLVRB	1.52992e+06	1.53518e+06	1.45422e+06	1.28792e+06	1.3163e+06	1.25663e+06
P30044	PRDX5	3.95609e+06	3.74689e+06	4.01364e+06	3.46943e+06	3597452	3.51927e+06
P30046	DDT	5.20497e+06	4.77138e+06	5.2531e+06	5.28773e+06	5386523	5.34731e+06
P30047	GCHFR	1.20849e+06	1.19844e+06	1.19402e+06	1.14053e+06	1.14876e+06	1.10215e+06
P30048	PRDX3	1.59116e+07	1.54762e+07	1.51245e+07	1.47327e+07	14031923	1.66106e+07
P30049	ATP5F1D	3.18835e+06	3.53018e+06	3.68932e+06	3.108e+06	3.3437e+06	3.25664e+06
P30050	RPL12	1.17693e+07	1.16239e+07	1.13882e+07	1.39104e+07	14097721	1.45308e+07
P30084	ECHS1	3.94576e+06	3.71229e+06	3.68796e+06	3.89811e+06	3881802	4.08284e+06
P30085	CMPK1	2.9352e+06	2.75618e+06	2.96958e+06	3.16666e+06	3.31415e+06	3.01802e+06
P30086	PEBP1	1.7502e+07	1.59881e+07	1.84289e+07	1.90065e+07	19812762	1.92025e+07
P30101	PDIA3	1.57087e+07	1.55132e+07	1.49642e+07	1.6367e+07	16435305	1.64747e+07
P30153	PPP2R1A	2.38921e+06	2.41356e+06	2.35056e+06	2.55555e+06	2.58462e+06	2.49648e+06
P30154	PPP2R1B	399837	408905	414392	424586	458089	419402
P30260	CDC27	538152	588474	541097	664275	632488	679249
P30291	WEE1	54294.5	65552	43208.2	31311.1	35320.4	33889.6
P30307	CDC25C	83547.1	107312	79110.4	91561.2	91111.5	85685.5
P30405	PPIF	2.23255e+06	2.16948e+06	2.07924e+06	2.06604e+06	2.02764e+06	2.09108e+06
P30408	TM4SF1	255950	340673	362102	343492	267631	336425
P30414	NKTR	102002	103198	103376	112357	116251	108386
P30419	NMT1	2.91354e+06	2.81153e+06	2.64919e+06	3.10399e+06	3.18991e+06	3.22007e+06
P30519	HMOX2	611566	572999	673630	564761	504066	678826
P30520	ADSS2	1.22605e+06	1.21283e+06	1.26336e+06	1.67719e+06	1.72973e+06	1.61068e+06
P30533	LRPAP1	1.03677e+06	1.01567e+06	1.03157e+06	1.28849e+06	1.30734e+06	1.23662e+06
P30536	TSPO	485047	490620	469801	489773	409049	467936
P30566	ADSL	903493	949855	889837	1.10105e+06	1.1233e+06	1.1219e+06
P30613	PKLR	8.33991e+06	8.57855e+06	8.60817e+06	8.87323e+06	9062900	8.60329e+06
P30622	CLIP1	211142	225872	217956	217427	225078	205098
P30711	GSTT1	645016	610786	641589	679254	672497	650417
P30740	SERPINB1	1.18268e+06	1.22752e+06	1.2676e+06	1.29498e+06	1.32109e+06	1.29743e+06
P30793	GCH1	68698.5	134126	92979.8	124444	107617	108569
P30825	SLC7A1	983959	1.02689e+06	1.05476e+06	943552	929049	920822
P30837	ALDH1B1	2.96953e+06	2.83706e+06	2.92103e+06	3.13789e+06	3.19912e+06	3.25934e+06
P30838	ALDH3A1	233110	261352	248975	300344	334005	315704
P30876	POLR2B	672928	653562	655772	663770	644834	651678
P31040	SDHA	2.35731e+06	2.1281e+06	2.24563e+06	2.07565e+06	1.97159e+06	2.12901e+06
P31146	CORO1A	945287	1.01491e+06	914250	510792	503891	480109
P31150	GDI1	1.27827e+06	1.31244e+06	1.17245e+06	910107	949593	929974
P31153	MAT2A	2.12112e+06	2.06915e+06	2.14511e+06	2.69857e+06	2.89654e+06	2.90315e+06
P31321	PRKAR1B	485155	642617	593744	821702	870356	737136
P31327	CPS1	342438	325806	333198	346540	352186	353962
P31350	RRM2	1.05701e+06	1.10817e+06	1.01045e+06	1.58996e+06	1.72664e+06	1.57844e+06
P31431	SDC4	286165	325621	296882	276336	292394	280141
P31483	TIA1	1.49479e+06	1.39714e+06	1.34204e+06	1.48447e+06	1.56279e+06	1.52537e+06
P31641	SLC6A6	268318	291052	239084	199143	191203	210720
P31689	DNAJA1	1.83009e+06	1.93553e+06	1.79195e+06	3.12241e+06	3.3338e+06	3.20571e+06
P31749	AKT1	139279	152183	148390	157339	155468	147395
P31751	AKT2	96421.7	95747.1	93071	109595	112873	107457
P31930	UQCRC1	5.41244e+06	4.95342e+06	4.96908e+06	4.96063e+06	4693470	5.1141e+06
P31937	HIBADH	1.80888e+06	1.75918e+06	1.89497e+06	1.8221e+06	1.78259e+06	1.9553e+06
P31939	ATIC	4.84067e+06	4.78081e+06	4.81068e+06	5.53925e+06	5.64018e+06	5.45528e+06
P31942	HNRNPH3	2.12688e+06	1.82008e+06	2.05583e+06	1.86367e+06	2.08762e+06	2.17038e+06
P31943	HNRNPH1	1.18375e+07	1.20048e+07	1.06277e+07	1.22094e+07	12569261	1.24575e+07
P31946	YWHAB	2.78403e+07	2.58564e+07	2.74981e+07	2.8648e+07	31301294	2.89963e+07
P31947	SFN	3.09863e+06	3.19394e+06	2.96906e+06	3.66599e+06	3.89199e+06	3.49881e+06
P31948	STIP1	6.17344e+06	5.99436e+06	5.82626e+06	6.6656e+06	7072074	6.50404e+06
P31949	S100A11	2.38873e+06	2.42974e+06	2.11004e+06	2.4684e+06	2492639	2.21006e+06
P32004	L1CAM	168805	172823	169684	71611.6	64581.5	69979.9
P32019	INPP5B	40463.1	41161.6	45534.2	41384.4	40996.5	37737.7
P32119	PRDX2	7.53824e+06	7.34606e+06	7.80985e+06	8.21787e+06	7.94247e+06	7.64072e+06
P32121	ARRB2	274636	306104	297539	254277	271113	258399
P32189	GK	840582	792282	812142	738660	636545	776772
P32320	CDA	125924	131722	124947	71665.3	75061.8	80556.6
P32321	DCTD	358884	367894	361890	360026	363530	339742
P32322	PYCR1	5.33691e+06	5.03881e+06	4.83594e+06	4.24998e+06	4.29748e+06	4.46704e+06
P32455	GBP1	122677	185631	150633	605698	705411	564289
P32456	GBP2	113695	90712.2	104664	110561	101924	106694
P32519	ELF1	140942	140033	145097	212077	201015	207340
P32754	HPD	3.29182e+06	3.2442e+06	3.34321e+06	4.26661e+06	4319480	4.06952e+06
P32780	GTF2H1	408445	381678	367571	344576	351609	364792
P32856	STX2	24996.3	21497.6	26099.8	14965.5	13362.3	12956.1
P32926	DSG3	101894	149396	134939	83256.4	96343.7	63212.8
P32929	CTH	180456	165568	161465	107274	103889	95741.7
P32969	RPL9	5.78155e+06	5.13392e+06	5.85915e+06	6.78432e+06	6832782	7.47719e+06
P33121	ACSL1	580481	643563	614998	500626	489818	519458
P33176	KIF5B	1.31721e+06	1.33789e+06	1.34548e+06	1.3976e+06	1.41879e+06	1.34105e+06
P33240	CSTF2	1.04464e+06	1.03165e+06	1.09261e+06	1.18934e+06	1.23206e+06	1.13143e+06
P33316	DUT	2.95747e+06	3.05531e+06	2.85411e+06	3.25461e+06	3.32271e+06	3.23591e+06
P33527	ABCC1	638479	613095	645977	571379	527979	583626
P33552	CKS2	352039	340686	358737	430480	505031	424622
P33764	S100A3	114424	83064.4	110235	62413.9	46841.4	52058.5
P33897	ABCD1	423255	453725	429657	408293	406264	419304
P33908	MAN1A1	1.4257e+06	1.2548e+06	1.3884e+06	1.23436e+06	1.19509e+06	1.25199e+06
P33947	KDELR2	23672.6	10091.6	14296.8	9777.54	15254.3	5943.62
P33981	TTK	60682.1	56160.8	50663.3	70069.4	59933.1	55221.9
P33991	MCM4	1.90626e+06	1.94484e+06	1.88851e+06	2.15318e+06	2.21372e+06	2.11873e+06
P33992	MCM5	1.11127e+06	1.12639e+06	1.10177e+06	1.32966e+06	1.3511e+06	1.39375e+06
P33993	MCM7	1.58953e+06	1.5292e+06	1.55546e+06	1.83995e+06	1928650	1.80979e+06
P34059	GALNS	60897.4	59925.5	65229.7	50376.6	48491	53233.1
P34096	RNASE4	52490.3	48202.4	41963.3	38679.2	30338.4	45208.2
P34741	SDC2	66871.4	63312.6	63511	60186	56204.7	44568.7
P34896	SHMT1	912865	936558	938084	1.01535e+06	1.00223e+06	972295
P34897	SHMT2	5.34192e+06	5.07966e+06	5.17118e+06	5.01822e+06	5131755	5.25284e+06
P34913	EPHX2	257936	250150	251907	283194	273854	277611
P34931	HSPA1L	157941	221185	210208	206407	193859	176531
P34932	HSPA4	6.29823e+06	6.5404e+06	6.03421e+06	6.29422e+06	6580808	6.19824e+06
P34949	MPI	529750	523577	524493	463240	475826	452366
P35080	PFN2	3.05358e+06	2.86382e+06	2.68771e+06	2.69351e+06	2.78892e+06	3.22904e+06
P35218	CA5A	197528	205816	209916	159204	149266	160520
P35221	CTNNA1	716382	685012	684052	610326	605235	574690
P35222	CTNNB1	4.31925e+06	4.23407e+06	4.19991e+06	4.24744e+06	4.28023e+06	4.12502e+06
P35226	BMI1	281665	269721	277749	246811	253748	298580
P35227	PCGF2	55575.4	52293.1	52433.8	48660.3	48778.4	51406.3
P35232	PHB	7.11591e+06	6.72257e+06	7.23335e+06	7.97833e+06	7600640	8.17191e+06
P35237	SERPINB6	1.48616e+06	1.45728e+06	1.44524e+06	1.51933e+06	1624973	1.43239e+06
P35240	NF2	282576	360223	241292	223863	234308	151210
P35241	RDX	6.45359e+06	6.06637e+06	6.39324e+06	6.4569e+06	6641512	6.17032e+06
P35244	RPA3	730221	698679	763501	710395	790777	709458
P35249	RFC4	810779	867508	821890	769912	799776	801032
P35250	RFC2	1.25505e+06	1.27743e+06	1.19278e+06	1.25971e+06	1295485	1.31912e+06
P35251	RFC1	326270	280672	354972	261890	265233	343101
P35268	RPL22	8.67466e+06	5.64737e+06	7.11836e+06	6.65275e+06	7763085	7.83874e+06
P35269	GTF2F1	682188	635304	650767	637266	650838	609873
P35270	SPR	1.39194e+06	1.34006e+06	1.39519e+06	1.66126e+06	1.78374e+06	1.66677e+06
P35503	UGT1A3	167019	170259	171578	131657	131009	160840
P35527	KRT9	367360	243759	346147	164767	116170	266013
P35542	SAA4	89393.1	119847	113129	169666	239069	169302
P35544	FAU	29001.8	22280.4	22933.2	37740	36276.4	27892.6
P35558	PCK1	5174.4	7107.69	11256.4	13433.4	26174.6	10728.6
P35568	IRS1	179533	161207	147587	173195	185923	167809
P35573	AGL	368080	350552	362844	383888	387411	387908
P35579	MYH9	2.07023e+06	2.12191e+06	1.96251e+06	2.1488e+06	2239644	2.24887e+06
P35580	MYH10	3.63462e+06	3.62067e+06	3.47651e+06	3.44617e+06	3.48987e+06	3.4544e+06
P35606	COPB2	2.37723e+06	2.41774e+06	2.28759e+06	2.1611e+06	2.16631e+06	2.10341e+06
P35609	ACTN2	101691	75065.2	85853.2	66428.3	87726.6	98083.6
P35610	SOAT1	293480	245053	353314	319794	247533	388218
P35611	ADD1	503098	508677	473216	429843	465573	426989
P35613	BSG	8.71522e+06	8.09861e+06	8.24208e+06	7.84027e+06	7508164	8.09575e+06
P35625	TIMP3	23891.8	29999	11160.3	34963.6	20487.4	33765.9
P35637	FUS	7.67326e+06	7.17379e+06	7.36671e+06	9.18342e+06	10356930	9.25433e+06
P35658	NUP214	624580	601663	598393	615376	629792	611386
P35659	DEK	3.39597e+06	3.06102e+06	3.4428e+06	3.26506e+06	3.1687e+06	3.51911e+06
P35670	ATP7B	188703	189008	176927	179439	168853	172748
P35680	HNF1B	46565.6	40104.7	37815.8	25733.8	13479.5	25130.2
P35711	SOX5	72320.4	57554.4	72047	85166.5	101079	81612.6
P35749	MYH11	941469	961616	900684	883268	888061	881946
P35754	GLRX	4.00256e+06	4.10685e+06	3.6704e+06	3.35206e+06	3.44758e+06	2.92802e+06
P35790	CHKA	205480	226498	231621	302211	316467	291559
P35813	PPM1A	444568	452266	432248	421014	421250	425745
P35869	AHR	154292	137691	152882	88173.9	99314.7	106133
P35908	KRT2	1.23171e+06	652592	1.23865e+06	1.13269e+06	616852	809244
P35914	HMGCL	1.18177e+06	1.08317e+06	1.02888e+06	900407	888140	884839
P35998	PSMC2	2.11299e+06	2.05114e+06	1.98367e+06	2.28682e+06	2.38192e+06	2.34033e+06
P36404	ARL2	652160	585960	538781	603089	649717	614896
P36405	ARL3	901864	874508	896597	793298	861772	791509
P36507	MAP2K2	593125	596746	588971	627548	623198	596195
P36537	UGT2B10	90072.8	84157.8	80833.3	67604.2	63269.7	84685.7
P36542	ATP5F1C	3.40866e+06	3.02827e+06	3.37862e+06	3.33791e+06	3140433	3.64373e+06
P36543	ATP6V1E1	730045	815574	733721	802230	802265	802950
P36551	CPOX	1.4688e+06	1.45111e+06	1.43396e+06	1.48287e+06	1399360	1.42604e+06
P36578	RPL4	1.25299e+07	1.17965e+07	1.13753e+07	1.37787e+07	14852098	1.42946e+07
P36639	NUDT1	388937	349407	385080	405810	425185	418793
P36776	LONP1	1.60785e+06	1.54815e+06	1.50987e+06	1.4535e+06	1465004	1.52529e+06
P36871	PGM1	986380	1.02176e+06	1.03288e+06	1.05154e+06	1.08349e+06	1.02809e+06
P36873	PPP1CC	2.9255e+06	2.87465e+06	2.61737e+06	2.87106e+06	2.82287e+06	2.90544e+06
P36888	FLT3	102739	142815	101676	73945.8	85684.5	86869.4
P36894	BMPR1A	68570.6	76740.2	27220.2	55437.3	53276.4	39126.1
P36897	TGFBR1	41797.4	29434.4	34015.3	27861.9	26765.9	32453.4
P36915	GNL1	495636	465132	487445	473207	483114	467064
P36954	POLR2I	384272	409783	358293	347388	392028	360167
P36955	SERPINF1	259116	247411	182051	305258	266850	247215
P36957	DLST	2.67569e+06	2.81863e+06	2.57354e+06	2.31121e+06	2.41736e+06	2.45206e+06
P36969	GPX4	416598	403663	414411	354107	387233	372243
P37059	HSD17B2	465123	416908	510369	433504	382959	520859
P37108	SRP14	3.1698e+06	2.84514e+06	2.85083e+06	3.08929e+06	2.94869e+06	3.32507e+06
P37173	TGFBR2	146157	149226	156829	197898	209815	203604
P37198	NUP62	673718	701067	619857	648895	705470	646575
P37235	HPCAL1	778661	840749	796325	866759	787891	807080
P37268	FDFT1	467053	547984	482556	1.15589e+06	1.10031e+06	1.3784e+06
P37275	ZEB1	11050.4	11490.4	11983.7	14200	11744.8	13540
P37802	TAGLN2	2.47307e+06	2.62599e+06	2.57668e+06	2.36613e+06	2538533	2.44233e+06
P37837	TALDO1	6.58594e+06	6.39197e+06	6.44172e+06	6.90709e+06	7.1965e+06	6.81063e+06
P38117	ETFB	4.77017e+06	4.50335e+06	4.59299e+06	4.20766e+06	4.18108e+06	4.4531e+06
P38159	RBMX	7.07943e+06	6.28002e+06	7.81694e+06	6.94153e+06	6778329	8.06726e+06
P38398	BRCA1	208238	214903	196244	197414	204534	182329
P38432	COIL	313571	303158	333163	400121	387939	373775
P38435	GGCX	574708	553328	672107	531854	472078	610142
P38570	ITGAE	1.67742e+06	1.56934e+06	1.45665e+06	1.9317e+06	1.53336e+06	1.9266e+06
P38571	LIPA	552666	646336	554190	429714	434480	383733
P38606	ATP6V1A	1.42959e+06	1.43244e+06	1.40402e+06	1.45609e+06	1.51758e+06	1.42853e+06
P38646	HSPA9	1.4754e+07	1.42902e+07	1.39259e+07	1.48447e+07	14937250	1.54603e+07
P38919	EIF4A3	5.24913e+06	5.07783e+06	5.06808e+06	5.17689e+06	5798415	5.54766e+06
P38935	IGHMBP2	87556.4	155124	94796.7	102622	142862	152986
P38936	CDKN1A	270172	273939	282427	221326	247887	247630
P39019	RPS19	7.07308e+06	6.63956e+06	7.1488e+06	8.45958e+06	8.37991e+06	8.80717e+06
P39023	RPL3	7.7217e+06	7.50197e+06	7.27565e+06	9.11097e+06	9380374	9.68394e+06
P39060	COL18A1	181083	185480	179958	243459	208073	234610
P39210	MPV17	127096	91547.2	44140.7	149830	90323	102276
P39656	DDOST	4.98169e+06	4.32108e+06	5.39043e+06	4.33489e+06	4.0724e+06	5.46463e+06
P39687	ANP32A	5.6557e+06	5.64162e+06	5.7979e+06	5.20146e+06	4.9282e+06	5.03691e+06
P39748	FEN1	2.57107e+06	2.4111e+06	2.63017e+06	2.58966e+06	2.45067e+06	2.60382e+06
P39880	CUX1	38800	38140.5	37699.7	26796.8	30684	25295.6
P40121	CAPG	234979	250735	219582	205286	208728	203493
P40123	CAP2	418577	429264	428431	456024	463852	434386
P40189	IL6ST	109434	112193	92217.4	201585	199964	199398
P40222	TXLNA	777324	767248	782547	973624	1.00043e+06	953265
P40227	CCT6A	3.5552e+06	3.34708e+06	3.5459e+06	4.15567e+06	4.31673e+06	4.11811e+06
P40306	PSMB10	34079.8	29955.7	29542.4	77301.3	89252.5	82532.4
P40337	VHL	115215	105200	114375	91444.6	101367	93302.7
P40425	PBX2	131800	153733	126935	144620	137908	126583
P40429	RPL13A	7.7971e+06	6.92982e+06	7.65542e+06	9.38154e+06	9582593	9.63236e+06
P40616	ARL1	1.05742e+06	1.03115e+06	1.04379e+06	986996	969805	1.02812e+06
P40692	MLH1	244904	248754	245073	226547	236885	229234
P40763	STAT3	2.284e+06	2.42353e+06	2.17486e+06	2.57405e+06	2.68768e+06	2.45055e+06
P40818	USP8	594950	603428	639183	681838	713124	664197
P40855	PEX19	228988	222457	213913	230730	256985	229625
P40925	MDH1	1.27249e+07	1.25759e+07	1.30587e+07	1.25316e+07	12504109	1.26861e+07
P40926	MDH2	1.29679e+07	1.15055e+07	1.21171e+07	1.26662e+07	11878329	1.33154e+07
P40937	RFC5	840568	903907	863000	860230	922054	862794
P40938	RFC3	518597	504857	492421	518777	512682	526207
P40939	HADHA	2.54879e+06	2.52691e+06	2.51282e+06	2.42858e+06	2380452	2.48819e+06
P41091	EIF2S3	3.53344e+06	3.4894e+06	3.37279e+06	3.89196e+06	3.89008e+06	4.02991e+06
P41134	ID1	117184	109044	108879	136441	157027	132425
P41208	CETN2	247405	228232	236130	247111	242324	232138
P41212	ETV6	18915.9	66137.2	102715	14709.3	1860.81	26132.8
P41214	EIF2D	416272	405409	421655	500426	527178	482953
P41223	BUD31	651274	608041	599683	686595	711763	668730
P41226	UBA7	42049.2	62022	44564.7	101146	115576	92904.1
P41227	NAA10	523688	536050	495159	479296	517429	475673
P41229	KDM5C	134860	129427	137662	160342	158556	155799
P41235	HNF4A	375078	405375	364498	463774	463643	465924
P41236	PPP1R2	410914	396517	428497	389026	434417	377092
P41240	CSK	876140	841333	837729	975933	962666	900479
P41250	GARS1	1.90487e+06	1.79793e+06	1.99766e+06	1.59426e+06	1.66745e+06	1.56743e+06
P41252	IARS1	2.27318e+06	2.19042e+06	2.26357e+06	2.02943e+06	2.14139e+06	2.02875e+06
P41440	SLC19A1	95890.1	131244	109409	198687	187887	210401
P41567	EIF1	402858	393261	437231	685942	650975	597188
P41743	PRKCI	438269	433606	416690	379853	369914	373240
P42025	ACTR1B	297688	333246	265685	275570	299229	276290
P42126	ECI1	2.34477e+06	2.38667e+06	2.34548e+06	1.95201e+06	2.06967e+06	2.04339e+06
P42166	TMPO	1.07807e+06	1.11726e+06	1.06385e+06	1.28776e+06	1.31224e+06	1.21771e+06
P42167	TMPO	3.91817e+06	3.27709e+06	4.47414e+06	3.5957e+06	3.00474e+06	4.49821e+06
P42224	STAT1	640600	1.43656e+06	655620	3.28098e+06	3423852	3.13678e+06
P42226	STAT6	131463	126866	125325	181588	180065	162376
P42285	MTREX	1.45317e+06	1.40958e+06	1.42099e+06	1.44321e+06	1.49318e+06	1.49162e+06
P42330	AKR1C3	5.86339e+06	5.80115e+06	6.14022e+06	5.97748e+06	5938085	5.84264e+06
P42336	PIK3CA	38376.8	31105.5	36310.7	46963.2	40169	42597.9
P42338	PIK3CB	69203.3	55783.4	63340	66791.9	71798.9	66959.5
P42345	MTOR	337675	342326	335515	327892	334070	318741
P42356	PI4KA	121692	124439	116745	107701	115573	102750
P42566	EPS15	340375	349788	353680	349527	380371	336455
P42574	CASP3	840701	900428	831186	968312	1.01403e+06	926305
P42575	CASP2	24054.5	25963.5	21488.8	46723.7	40257.7	40796.7
P42677	RPS27	1.11337e+06	1.04063e+06	980723	1.54396e+06	1.66009e+06	1.4555e+06
P42684	ABL2	463613	479739	494215	337556	528861	433271
P42685	FRK	23049.2	26237.1	21711.9	21552.6	21441.8	16442.7
P42694	HELZ	130669	141317	128465	114761	105219	106055
P42695	NCAPD3	189982	193950	190290	194229	218173	215723
P42696	RBM34	297553	285142	297333	249034	289688	301270
P42704	LRPPRC	5.43016e+06	5.15969e+06	5.27983e+06	5.77127e+06	5666706	6.22388e+06
P42765	ACAA2	2.53859e+06	2.59733e+06	2.37906e+06	2.16269e+06	2.25574e+06	2.27204e+06
P42766	RPL35	6.7238e+06	5.4697e+06	7.0741e+06	8.58879e+06	9060732	9.08591e+06
P42771	CDKN2A	186240	173648	207303	192699	188987	188361
P42785	PRCP	1.08877e+06	994672	1.11549e+06	812736	801475	785592
P42858	HTT	212485	225566	207569	203692	210197	206920
P42892	ECE1	165588	185908	168677	286874	279995	299947
P42898	MTHFR	90115.5	70875.9	88202.3	91504	95826.5	81438.1
P43007	SLC1A4	455070	439541	476234	485701	510730	519116
P43034	PAFAH1B1	1.08139e+06	1.04742e+06	1.03327e+06	1.02586e+06	1.0189e+06	988510
P43121	MCAM	96380.7	127765	101083	39810.8	44346.3	34989.2
P43155	CRAT	348015	360297	350049	277328	265091	269472
P43243	MATR3	3.30908e+06	3.18257e+06	3.20114e+06	3.32457e+06	3.50303e+06	3.3606e+06
P43246	MSH2	1.05475e+06	1.03809e+06	1.01311e+06	1.05527e+06	1.07453e+06	1.05068e+06
P43307	SSR1	2.69456e+06	2.58693e+06	3.32599e+06	2.61105e+06	2.30535e+06	3.38521e+06
P43378	PTPN9	52391.8	64131.3	56150.7	73898.3	79443.3	76198.3
P43487	RANBP1	6.64107e+06	6.36024e+06	6.04319e+06	7.27327e+06	6.85813e+06	7.07032e+06
P43490	NAMPT	1.10468e+06	1.1602e+06	1.15295e+06	1.47335e+06	1.51527e+06	1.41458e+06
P43686	PSMC4	2.01056e+06	1.83608e+06	2.02691e+06	2.2528e+06	2329458	2.29115e+06
P43694	GATA4	123278	124633	125704	107033	113976	100488
P43897	TSFM	1.69579e+06	1.63342e+06	1.61332e+06	1.68314e+06	1.60165e+06	1.65517e+06
P45877	PPIC	182967	113058	147748	131309	157934	144381
P45880	VDAC2	7.72e+06	7.24295e+06	7.61871e+06	6.91949e+06	5980851	7.24073e+06
P45954	ACADSB	2.90496e+06	2.94296e+06	2.76453e+06	2.79858e+06	2.77909e+06	2.86772e+06
P45973	CBX5	702977	685846	673388	556305	560269	524341
P45974	USP5	1.01748e+06	1.04865e+06	1.05497e+06	1.10528e+06	1.14646e+06	1.03032e+06
P45983	MAPK8	177121	181066	183401	164818	133256	154570
[truncated: 5,674 more rows]

## Sheet: DDA_M1
Protein_ID	Genename	C2_1	C2_2	C2_3	M1_1	M1_2	M1_3
A0A024QZX5	SERPINB6	3.05539e+09	2.61365e+09	2.81663e+09	2.94405e+09	3055300000	2.99654e+09
A0A024R4E5	HDLBP	1.57704e+10	1.49698e+10	1.66792e+10	1.47272e+10	16274000000	1.4963e+10
A0A024RA52	PSMA2	1.16328e+10	1.34076e+10	1.14495e+10	1.30768e+10	13625000000	1.16755e+10
A0A024RAC6	TCEB3	4.44673e+07	4.70002e+07	1.36819e+08	6.8912e+07	44654000	5.66997e+07
A0A075B6F3	DNAH8	3.68153e+07	1.73209e+09	2.47656e+08	1.99954e+08	546490000	6.49047e+08
A0A075B7D9	TAF15	3.2903e+08	4.70109e+08	7.48178e+08	6.66415e+08	595310000	5.17239e+08
A0A087WT20	DCAF13	5.94169e+08	6.07081e+08	5.61125e+08	5.08173e+08	773610000	7.90423e+08
A0A087WT99	C11orf54	5.38453e+08	5.28268e+08	8.41022e+08	5.54571e+08	534920000	5.08272e+08
A0A087WTA5	EIF2B4	7.63292e+08	6.27618e+08	6.24542e+08	8.87298e+08	1245900000	6.40972e+08
A0A087WTF3	ANK3	2.20068e+08	3.02946e+08	2.29006e+07	6.32405e+07	244440000	2.92114e+08
A0A087WTL4	BCL2L13	2.36735e+08	2.68025e+08	9.13094e+07	3.17739e+08	133310000	1.69527e+08
A0A087WTS0	GPX2	4.65678e+08	3.77927e+08	4.94519e+08	2.70004e+08	511140000	4.78778e+08
A0A087WTU5	NOL4L	6.99736e+07	5.07595e+07	7.53516e+07	8.64233e+07	52918000	5.07032e+07
A0A087WTV1	OSBPL2	1.00662e+08	8.37075e+07	7.23048e+07	8.0107e+07	71794000	5.64274e+07
A0A087WU02	ERGIC2	1.4922e+08	1.24256e+08	3.05087e+07	4.26632e+07	61473000	2.60366e+07
A0A087WU53	MAGT1	3.85696e+08	4.20873e+08	5.40864e+08	3.11977e+08	333330000	4.50486e+08
A0A087WU65	VPS45	2.45894e+08	1.88968e+08	1.10709e+08	9.15905e+07	198520000	1.84993e+08
A0A087WUA0	FGA	3.7018e+08	5.00037e+08	2.81722e+08	4.0166e+08	280000000	3.09495e+08
A0A087WUB9	CTNNBL1	1.87609e+09	2.13874e+09	1.56491e+09	1.70133e+09	1713700000	1.17187e+09
A0A087WUC6	SPCS2	1.23026e+09	1.12856e+09	9.02009e+08	8.34486e+08	874210000	9.76937e+08
A0A087WUD3	OSTC	9.41717e+08	1.36933e+09	1.21163e+09	8.42636e+08	935300000	1.22249e+09
A0A087WUL4	PEG10	2.53736e+09	2.86134e+09	3.10348e+09	3.54349e+09	3786100000	3.76981e+09
A0A087WUQ6	GPX1	2.67825e+08	3.33088e+08	3.20837e+08	2.11967e+08	269080000	2.6401e+08
A0A087WUT6	EIF5B	7.74487e+09	8.27157e+09	7.24208e+09	8.66271e+09	8365000000	6.9795e+09
A0A087WV25	FGFR1OP	3.66869e+08	5.46709e+08	5.71017e+08	5.50268e+08	473410000	4.67735e+08
A0A087WV34	GLMP	1.67614e+08	2.82037e+07	1.28522e+08	1.84167e+08	191770000	1.7887e+08
A0A087WVC1	DDX50	3.64625e+08	5.40867e+08	3.73219e+08	4.98393e+08	586770000	6.49075e+08
A0A087WVD4	AS3MT	1.6698e+08	2.90074e+08	3.00533e+08	2.65855e+08	206290000	1.38155e+08
A0A087WVI0	COG1	1.52457e+08	4.29708e+07	1.46941e+08	1.68552e+08	61554000	1.41705e+08
A0A087WVM4	MTHFD1L	2.78019e+09	2.56577e+09	3.46546e+09	2.68341e+09	2977200000	2.68498e+09
A0A087WVQ6	CLTC	7.20048e+10	7.40289e+10	7.61165e+10	7.35902e+10	77757000000	7.22045e+10
A0A087WVR3	UHRF1	1.00036e+09	9.1384e+08	8.49106e+08	1.01623e+09	593560000	9.65481e+08
A0A087WVZ9	POLR2E	9.13105e+08	1.0091e+09	1.26373e+09	1.21428e+09	946340000	9.36353e+08
A0A087WW18	ZBTB8OS	5.062e+07	7.30811e+07	8.31617e+07	5.2559e+07	71777000	6.89124e+07
A0A087WW77	LLGL1	2.34858e+08	1.06362e+08	3.79043e+08	3.39654e+08	173540000	8.37035e+07
A0A087WWF6	POLD2	2.92417e+08	3.48096e+08	1.19586e+08	1.50581e+08	277160000	3.65835e+08
A0A087WWG3	CBWD3	4.46417e+07	7.59949e+07	4.15932e+07	4.99501e+07	62939000	6.15553e+07
A0A087WWM0	TRAPPC3	2.45269e+08	2.67655e+08	3.05351e+08	3.1844e+08	257210000	3.68423e+07
A0A087WWP5	TAF10	1.00695e+08	1.14426e+08	8.61334e+07	1.02683e+08	88815000	8.78051e+07
A0A087WWS1	THOC1	3.20629e+08	3.16111e+08	1.76027e+08	2.39033e+08	228580000	3.75309e+08
A0A087WWT4	TSPAN10	2.55371e+08	1.85799e+08	2.41533e+08	1.7389e+08	185050000	1.6995e+08
A0A087WWW9	BCL10	4.37085e+07	5.61119e+07	4.93589e+07	4.29721e+07	5.2877e+07	3.90923e+07
A0A087WXA6	GRIPAP1	3.005e+07	9.5431e+07	4.3702e+07	4.32695e+07	5.57937e+07	1.6718e+08
A0A087WXC5	NDUFA10	2.0119e+09	1.74926e+09	9.19831e+08	2.05162e+09	1990500000	1.98411e+09
A0A087WXE2	RPUSD2	6.12137e+07	4.7991e+07	3.64666e+07	5.1039e+07	54433000	5.65006e+07
A0A087WXI5	CDH1	1.78675e+08	1.1035e+08	1.09242e+08	6.27906e+07	66486000	6.86889e+07
A0A087WXM6	RPL17	1.26872e+10	1.3785e+10	1.02557e+10	1.03424e+10	16099000000	1.64898e+10
A0A087WXN9	MTSS1L	9.20779e+07	7.54566e+07	6.29198e+07	9.38725e+07	69013000	9.91491e+07
A0A087WXU0	RMND1	2.09382e+08	2.13601e+08	1.33587e+08	1.08999e+08	181580000	1.49977e+08
A0A087WXV4	HNF4A	7.71668e+08	8.29508e+08	6.37989e+08	1.03913e+09	1137800000	1.31601e+09
A0A087WY55	VTA1	2.09565e+09	2.53885e+09	2.20258e+09	2.74543e+09	2712500000	2.22694e+09
A0A087WY71	AP2M1	2.00231e+09	2.34216e+09	1.94011e+09	2.01747e+09	2302900000	2.0689e+09
A0A087WYE6	ZMIZ1	3.40992e+07	5.14733e+07	4.50511e+07	5.64114e+07	40965000	3.38981e+07
A0A087WYJ2	POLD1	2.39204e+08	4.37285e+08	4.54015e+08	5.41825e+08	481330000	5.10648e+08
A0A087WYN9	DHX29	4.26463e+07	5.05703e+07	4.81515e+07	5.06755e+07	103330000	3.42127e+07
A0A087WYR0	SRP19	4.06885e+08	3.97918e+08	5.91021e+08	4.71702e+08	418000000	4.56664e+08
A0A087WYR3	TPD52L2	7.66863e+09	8.51673e+09	8.21205e+09	7.0437e+09	9586500000	8.39514e+09
A0A087WYT3	PTGES3	1.057e+10	1.25563e+10	1.228e+10	1.21102e+10	12829000000	1.16662e+10
A0A087WYV6	TSPAN6	2.01532e+08	3.99361e+08	4.66976e+08	5.00056e+08	494110000	5.50104e+08
A0A087WZ13	RAVER1	2.29653e+09	2.10256e+09	2.43e+09	2.80085e+09	2943000000	2.5662e+09
A0A087WZ85	ROBO1	9.70247e+07	6.82452e+07	4.2281e+07	4.35092e+07	62615000	6.55338e+07
A0A087WZN1	IDH3B	1.41579e+09	1.2762e+09	1.81417e+09	1.5446e+09	1204300000	1.33667e+09
A0A087WZR3	BRCC3	2.90073e+08	4.1862e+08	3.73253e+08	3.85311e+08	517730000	4.5026e+08
A0A087WZT2	METTL7B	4.33312e+07	1.17937e+08	6.8888e+07	5.6753e+07	100890000	1.37817e+08
A0A087X0G7	IKBKG	1.48895e+08	1.2253e+08	1.70638e+08	2.16018e+08	251060000	1.03328e+08
A0A087X0J3	CAP2	8.89414e+08	7.84006e+08	5.74044e+08	1.0256e+09	903040000	8.40678e+08
A0A087X0K9	TJP1	2.59066e+08	2.61999e+08	2.49123e+08	3.31569e+08	457280000	4.17555e+08
A0A087X0L7	OXA1L	4.67021e+07	3.16715e+08	4.44814e+07	4.78947e+08	700750000	7.35661e+08
A0A087X0M4	SLC4A1AP	5.06395e+08	5.38615e+08	4.18883e+08	6.50033e+08	742170000	6.6054e+08
A0A087X0Q1	YTHDF3	6.69713e+08	6.59897e+08	6.9183e+08	6.79887e+08	822920000	5.82143e+08
A0A087X0R6	SNX12	2.89864e+08	3.35907e+08	2.59458e+08	3.7311e+08	530460000	2.42957e+08
A0A087X0V5	OAS2	5.26833e+07	6.24986e+07	5.01196e+07	9.93004e+08	790840000	6.79987e+08
A0A087X142	SEPT8	3.72966e+08	2.87158e+08	2.76657e+08	1.51143e+08	331410000	3.71065e+08
A0A087X163	RAB18	6.09543e+08	6.99518e+08	5.78179e+08	7.6107e+08	711990000	1.01807e+09
A0A087X1E4	ARFIP2	4.20332e+08	2.97183e+08	1.51588e+08	1.75308e+08	257040000	2.59315e+08
A0A087X1F5	SYNJ2BP-COX16	3.17735e+08	2.57571e+08	2.67985e+08	1.45405e+08	210730000	2.24703e+08
A0A087X1W8	CADM1	2.51467e+08	5.04806e+08	4.12001e+08	2.07501e+08	402160000	5.62133e+08
A0A087X1X9	SMAP1	4.80632e+07	6.72837e+07	7.18614e+07	8.6676e+07	75721000	7.61971e+07
A0A087X1Z3	PSME2	1.77374e+10	2.53251e+10	2.34055e+10	2.91096e+10	29023000000	2.52695e+10
A0A087X2D5	MRPL45	1.01613e+09	1.07386e+09	1.01738e+09	1.01346e+09	1629600000	1.28568e+09
A0A087X2H1	HECTD1	2.98432e+08	3.37808e+08	3.09299e+08	3.69524e+08	499490000	4.55894e+08
A0A087X2I1	PSMC6	9.07599e+09	9.27766e+09	7.47206e+09	9.79964e+09	10549000000	8.67787e+09
A0A096LP25	AAK1	1.10906e+08	8.57583e+07	1.10334e+08	6.237e+07	91653000	9.6088e+07
A0A096LPI6	C21orf33	2.16439e+09	2.56557e+09	2.40749e+09	2.71096e+09	2269400000	2.2582e+09
A0A0A0MQU4	SCLY	2.47771e+08	3.94485e+08	1.88162e+08	1.48625e+08	292330000	1.90044e+08
A0A0A0MR02	VDAC2	2.04619e+10	2.12645e+10	2.03169e+10	2.07362e+10	17919000000	2.18468e+10
A0A0A0MR04	SEC11C	3.17801e+08	4.33872e+08	2.91716e+08	2.97592e+08	210620000	4.38091e+08
A0A0A0MRA5	HNRNPUL1	4.15569e+09	3.98756e+09	5.08009e+09	4.93707e+09	4684400000	4.64965e+09
A0A0A0MRE1	EXOC7	8.84242e+07	1.06245e+08	6.86671e+07	7.03595e+07	127560000	9.80223e+07
A0A0A0MRH6	MIA3	6.06406e+07	1.21048e+08	1.24983e+08	9.56329e+07	53143000	7.60337e+07
A0A0A0MRH8	CHD1L	1.75997e+08	1.80738e+08	1.77434e+08	1.16733e+08	181170000	1.3762e+08
A0A0A0MRJ6	PCMT1	6.56399e+09	8.07206e+09	8.88962e+09	7.36294e+09	7091500000	6.35892e+09
A0A0A0MRK1	GPATCH4	1.16895e+08	1.71308e+08	6.62096e+07	6.19715e+07	171620000	1.367e+08
A0A0A0MRM9	NOLC1	4.63017e+07	4.60367e+07	4.53648e+08	4.66616e+08	4.2534e+07	4.6725e+07
A0A0A0MSA9	PVR	3.11395e+08	2.97202e+08	3.3419e+08	3.57348e+08	433560000	2.75127e+08
A0A0A0MSK6	ARHGAP5	1.5244e+08	8.29439e+07	1.28633e+08	1.40507e+08	127540000	1.39263e+08
A0A0A0MSS8	AKR1C3	2.46136e+10	2.43831e+10	2.86557e+10	2.82718e+10	23138000000	2.24825e+10
A0A0A0MSW4	PITPNB	1.78467e+09	1.7789e+09	2.06768e+09	2.22415e+09	1903900000	1.44212e+09
A0A0A0MT32	LIPA	1.40319e+09	1.47114e+09	1.42336e+09	1.08249e+09	814890000	6.46324e+08
A0A0A0MT33	SCAF8	3.77796e+07	4.67671e+07	3.13e+08	3.17282e+08	600850000	3.34688e+08
A0A0A0MT83	IVD	3.99661e+09	4.17762e+09	3.27283e+09	2.88977e+09	3101500000	3.26763e+09
A0A0A0MTB8	WDR36	1.32111e+09	1.24607e+09	1.23159e+09	1.37019e+09	1238400000	1.42775e+09
A0A0A0MTG2	DYNC1I1	1.35956e+08	1.31375e+08	1.40486e+08	1.31664e+08	127550000	7.99794e+07
A0A0A0MTH3	ILK	1.75864e+08	2.02289e+08	3.36339e+08	3.05065e+08	374860000	3.27871e+08
A0A0A0MTH9	BTAF1	2.16155e+08	1.35022e+08	1.27439e+08	9.05147e+07	165090000	1.57959e+08
A0A0A0MTI1	DHCR24	2.45828e+09	2.41832e+09	2.67942e+09	2.52041e+09	2224300000	3.28754e+09
A0A0A0MTI6	ELOVL5	1.83363e+08	2.3759e+08	1.99128e+08	1.89701e+08	216320000	2.57887e+08
A0A0A0MTJ9	NCEH1	6.11503e+08	6.1733e+08	5.56938e+08	3.52988e+08	458730000	6.33084e+08
A0A0A0MTQ5	C14orf2	4.17179e+08	4.52215e+08	5.35748e+07	3.98025e+08	407280000	4.57158e+07
A0A0A0MTR7	RNF213	6.20454e+08	1.77559e+09	5.50014e+08	4.63193e+09	4596400000	5.07061e+09
A0A0A6YYA0	TMED7-TICAM2	1.26989e+09	1.5513e+09	1.09515e+09	1.62724e+09	2317800000	2.34027e+09
A0A0A6YYI3	PPAN-P2RY11	4.00737e+08	1.8299e+08	3.18688e+08	3.06524e+08	366000000	4.39349e+08
A0A0B4J1R2	ACSS3	2.92567e+09	3.48779e+09	2.74849e+09	2.40272e+09	2306400000	2.63972e+09
A0A0B4J1V9	HELLS	2.8682e+08	3.83865e+08	3.5168e+08	4.00992e+08	321650000	4.40711e+08
A0A0B4J1Z1	SRSF7	4.29024e+09	4.6263e+09	4.51397e+09	4.78466e+09	5740200000	5.30423e+09
A0A0B4J287	COMMD4	8.44201e+07	8.76442e+07	5.87832e+07	8.47444e+07	131960000	1.21159e+08
A0A0B4J297	NAA38	1.38484e+08	9.18677e+07	3.19742e+07	5.41782e+07	49527000	5.01286e+07
A0A0B4J2A0	TRPV1	7.36874e+08	9.34865e+08	4.12427e+08	6.05314e+08	700570000	9.99097e+08
A0A0B4J2F8	POLR2J3	9.2103e+07	6.03298e+07	7.77674e+07	8.71405e+07	172270000	2.13059e+08
A0A0C4DFL7	CYP51A1	1.19473e+08	4.38374e+07	1.53891e+08	3.28684e+08	198570000	3.17054e+08
A0A0C4DFM1	TM9SF4	3.63565e+09	4.4612e+09	1.66613e+09	2.00883e+09	4789200000	4.91454e+09
A0A0C4DFS6	SPRY4	1.91447e+08	2.36079e+08	2.35488e+08	2.33907e+08	224020000	2.41342e+08
A0A0C4DFX9	NELFA	3.98234e+08	3.58599e+08	2.33637e+08	2.15724e+08	256610000	3.17091e+08
A0A0C4DFZ2	ARSA	2.67842e+08	2.1678e+08	2.78081e+08	1.47524e+08	162680000	6.2992e+07
A0A0C4DG44	HTRA2	5.39037e+08	5.34353e+08	4.50126e+08	2.29343e+08	398490000	4.55453e+08
A0A0C4DG67	PDZK1	5.43033e+07	6.32405e+07	5.38374e+07	4.28487e+07	73118000	9.5102e+07
A0A0C4DG68	PUM2	1.38284e+08	1.09238e+08	1.2338e+08	1.08404e+08	161460000	1.06708e+08
A0A0C4DG89	DDX46	4.00753e+09	3.92661e+09	3.74686e+09	3.24748e+09	3375500000	2.96706e+09
A0A0C4DGA2	ECI2	3.83069e+09	4.11745e+09	3.38147e+09	3.19874e+09	3574300000	3.54323e+09
A0A0C4DGB0	SCOC	4.36053e+07	4.95166e+07	5.23861e+08	4.65622e+08	698520000	1.0144e+09
A0A0C4DGD2	SLU7	4.55126e+07	6.05453e+07	4.74318e+07	7.22487e+07	58491000	5.93627e+07
A0A0C4DGQ5	CAPNS1	1.78825e+09	2.10987e+09	2.01072e+09	2.24779e+09	2210800000	2.14787e+09
A0A0C4DGQ6	RPRD1A	2.31838e+08	4.03242e+08	5.21465e+08	2.63361e+08	261220000	3.75957e+08
A0A0C4DGS1	DDOST	1.37483e+10	9.95062e+09	1.61224e+10	9.59019e+09	11291000000	1.52447e+10
A0A0C4DGS9	CEPT1	6.82885e+07	9.46567e+07	8.23977e+07	7.37166e+07	49036000	8.21204e+07
A0A0C4DGW6	C5orf51	7.98337e+07	9.11354e+07	3.70299e+07	1.1261e+08	188760000	6.98946e+07
A0A0D9SFB3	DDX3X	1.53191e+10	1.53179e+10	1.4544e+10	1.80174e+10	19687000000	1.83716e+10
A0A0D9SFB5	ADH4	3.0211e+08	3.80091e+08	2.81202e+08	3.24348e+08	321840000	3.13918e+08
A0A0D9SFD6	PNKP	1.63993e+08	1.87398e+08	1.23065e+08	1.1133e+08	187640000	1.5071e+08
A0A0D9SFJ1	COQ6	3.69346e+07	5.02943e+07	6.15153e+07	5.93219e+07	39859000	3.59027e+07
A0A0D9SFK2	MYO18A	5.84901e+08	4.57832e+08	5.77523e+08	6.14874e+08	466780000	4.52401e+08
A0A0D9SFR5	TBC1D24	4.36493e+07	8.75653e+07	1.12031e+08	6.50889e+07	69679000	6.27826e+07
A0A0D9SG71	UBE2A	1.87134e+08	2.18096e+08	1.58538e+08	1.29619e+08	95483000	1.46362e+08
A0A0G2JIW1	HSPA1B	3.62047e+10	3.71149e+10	3.67642e+10	4.65206e+10	49380000000	4.06963e+10
A0A0G2JJL1	WDR46	3.72725e+08	3.35234e+08	4.04369e+08	4.02654e+08	320750000	3.46604e+08
A0A0G2JKZ1	TAPBP	1.79026e+08	1.95141e+08	2.59807e+08	3.52996e+08	259890000	4.83971e+08
A0A0G2JLK6	PPT2	5.14086e+07	4.5925e+07	5.8258e+07	3.10865e+07	5.27679e+07	5.90998e+07
A0A0G2JLV0	TAP2	2.44743e+08	2.43178e+08	5.38869e+07	2.05219e+08	118830000	4.83276e+08
A0A0G2JN29	NOMO1	1.05141e+08	7.78848e+07	1.5274e+08	8.60973e+07	97766000	7.81775e+07
A0A0G2JNZ2	SCRIB	7.868e+08	6.87962e+08	5.96129e+08	5.61287e+08	734560000	5.54424e+08
A0A0G2JNZ5	GBA	6.43728e+07	6.36414e+07	4.15248e+07	4.16887e+07	219260000	5.69741e+07
A0A0J9YWJ4	CTDP1	1.07335e+08	5.38742e+07	4.03465e+07	4.65222e+07	42986000	4.25133e+07
A0A0J9YX88	PHRF1	5.3082e+07	3.80569e+07	3.96753e+07	1.04783e+08	40705000	2.70667e+07
A0A0J9YXF2	PON2	2.29986e+09	2.79854e+09	3.60437e+09	3.00901e+09	2453800000	2.94846e+09
A0A0J9YYJ0	CNPY4	3.44496e+07	5.37562e+07	3.49948e+07	2.74894e+07	4.33983e+07	4.21771e+07
A0A0U1RQI5	SORBS1	2.68251e+08	3.2792e+08	2.33066e+08	1.9931e+08	145570000	2.11003e+08
A0A0U1RRL8	SPATA20	1.89378e+08	1.0604e+08	1.24574e+08	1.28445e+08	133990000	4.03639e+07
A0A0U1RRM4	PTBP1	3.44779e+10	3.37116e+10	3.64999e+10	2.70493e+10	31714000000	3.27298e+10
A0A0U1RRM8	FERMT2	4.01279e+08	3.41153e+08	3.17613e+08	4.97505e+08	511340000	4.55068e+08
A0A140T930	HLA-C	3.43711e+08	1.82708e+08	2.48313e+08	1.86099e+09	527060000	7.57652e+08
A0A140TA73	SNTB2	1.27731e+08	5.10988e+07	5.52388e+07	4.61818e+07	46190000	5.73824e+07
A0A140TA86	QIL1	3.33526e+08	3.2948e+08	3.82889e+08	3.07404e+08	270530000	2.8678e+08
A0A182DWF2	TXNRD2	5.22695e+08	5.75593e+08	5.61244e+08	5.03356e+08	558860000	5.55983e+08
A0A1B0GTB8	CPT2	3.68312e+08	3.76279e+08	3.75632e+08	3.19532e+08	393330000	3.94803e+08
A0A1B0GU95	TTC33	6.97817e+07	1.24158e+08	1.57694e+08	6.7672e+07	83538000	4.84846e+07
A0A1B0GUA3	KIAA1279	4.35497e+08	4.81236e+08	6.07419e+08	6.5516e+08	604190000	5.37184e+08
A0A1B0GUC3	FTO	9.34543e+08	1.16776e+09	1.13224e+09	1.04663e+09	899220000	9.39659e+08
A0A1B0GV54	ATG5	1.1823e+08	1.31209e+08	1.73435e+08	1.30311e+08	158150000	1.2838e+08
A0A1B0GVD5	CTSD	1.87167e+10	2.37239e+10	1.59433e+10	1.06823e+10	14926000000	1.5301e+10
A0A1B0GWI2	CLN5	1.618e+08	1.90938e+08	1.5013e+08	3.91203e+07	131200000	6.8594e+07
A0A1C7CYW7	NA	2.17832e+08	2.35045e+08	2.10239e+08	1.94876e+08	245710000	2.29229e+08
A0A1C7CYX9	DPYSL2	1.22609e+10	1.12408e+10	1.23235e+10	1.14378e+10	10813000000	1.11797e+10
A0A1W2PNR9	IER3IP1	3.7984e+08	3.96299e+08	3.25092e+08	2.9597e+08	399560000	4.19217e+08
A0A1W2PNV4	NA	5.13836e+08	5.06561e+08	2.01643e+08	4.13877e+08	554440000	5.05342e+08
A0A1W2PNX8	UNC45A	4.43397e+08	5.83541e+08	5.69584e+08	7.94346e+08	729040000	4.92788e+08
A0A1W2PPH1	ME2	4.57762e+08	4.66677e+08	7.86158e+08	8.74665e+08	603780000	6.33065e+08
A0A1W2PPX5	SCARB2	1.28966e+09	1.44442e+09	1.02207e+09	1.23539e+09	1065400000	1.05882e+09
A0A1W2PPZ5	TCEA1	2.85168e+09	3.64459e+09	3.19856e+09	2.65203e+09	2195100000	2.45042e+09
A0A1W2PQ90	RAD50	9.95606e+08	9.01387e+08	7.30996e+08	7.88478e+08	968740000	8.11147e+08
A0A1W2PQS6	RPS10	1.48136e+10	1.2802e+10	1.20063e+10	1.28624e+10	14352000000	1.4978e+10
A0A1W2PQV2	GCSH	1.36707e+09	1.90265e+09	1.2431e+09	1.28388e+09	1613500000	1.45827e+09
A0A1W2PRV5	SMN1	1.11423e+09	1.28254e+09	1.13122e+09	1.18249e+09	813840000	6.47244e+08
A0A1W2PS02	POMP	3.62848e+07	4.7479e+07	5.60905e+07	1.39586e+07	71674000	5.87261e+07
A0A1X7SBZ2	DDX17	9.53396e+09	9.95257e+09	9.30064e+09	8.87135e+09	9845000000	8.79196e+09
A0A286YF22	PHGDH	1.42263e+10	1.32477e+10	1.31242e+10	9.86566e+09	10828000000	8.19955e+09
A0A286YFD6	RRM2	1.40761e+09	1.7241e+09	1.42115e+09	2.33915e+09	2704400000	2.45906e+09
A0A286YFF8	MON2	3.33659e+08	1.99529e+08	2.72598e+08	3.53297e+08	278580000	2.75184e+08
A0A2C9F2P4	PPT1	3.27536e+09	3.3892e+09	3.03577e+09	1.47378e+09	1916100000	2.0151e+09
A0A2R8Y473	ABCB7	4.67781e+07	4.04292e+07	1.1632e+08	5.45859e+07	43059000	6.56756e+07
A0A2R8Y4W2	EPS8	3.16976e+08	4.63897e+08	3.11278e+08	3.48073e+08	391500000	2.95466e+08
A0A2R8Y543	CTNNB1	2.02283e+10	1.97442e+10	2.00262e+10	1.67354e+10	20205000000	1.66673e+10
A0A2R8Y595	CTCF	8.01699e+07	7.72285e+07	1.48791e+08	1.16318e+08	6.90609e+07	3.62885e+07
A0A2R8Y5E4	BCAR1	8.13728e+07	3.25492e+07	6.93732e+07	4.33641e+07	35902000	4.91116e+06
A0A2R8Y5S7	RDX	3.75761e+09	3.70281e+09	3.43263e+09	2.9641e+09	3468900000	3.41177e+09
A0A2R8Y619	NA	4.26645e+07	3.19742e+07	8.25853e+07	3.0205e+07	3.99268e+07	5.1122e+07
A0A2R8Y653	UCK2	2.7942e+08	2.55338e+08	3.55431e+08	3.85205e+08	282750000	3.21843e+08
A0A2R8Y6I1	HARS2	1.10814e+08	1.1427e+08	1.26314e+08	1.54713e+08	73781000	1.17572e+08
A0A2R8Y6W8	ERCC3	2.63354e+07	6.28662e+07	8.10546e+07	1.15152e+08	24356000	1.03084e+08
A0A2R8Y6X0	ADNP	2.82565e+08	2.66387e+08	4.13928e+08	3.98962e+08	304200000	5.10507e+08
A0A2R8Y7F8	INTS2	8.63888e+07	1.02471e+08	1.02028e+08	6.34524e+07	70009000	6.72672e+07
A0A2R8Y7W8	MEA1	4.59806e+07	4.41137e+07	7.08364e+07	8.11755e+07	58346000	8.46491e+07
A0A2R8Y840	CHD8	1.6104e+08	1.76369e+08	1.21607e+08	1.05152e+08	151330000	1.67856e+08
A0A2R8Y851	RPS29	3.93988e+09	3.57351e+09	2.63576e+09	3.55962e+09	4441500000	3.67168e+09
A0A2R8Y880	RBBP6	1.49754e+08	1.99949e+08	1.72327e+08	2.10476e+08	164570000	2.07022e+08
A0A2R8Y891	PFKM	7.39193e+08	8.5337e+08	8.87683e+08	9.34894e+08	836930000	4.55598e+07
A0A2R8YD50	HSD17B4	9.22114e+09	1.01213e+10	9.13862e+09	1.00295e+10	10788000000	1.053e+10
A0A2R8YDE6	HDAC6	1.1727e+08	4.61391e+07	1.15152e+08	1.75316e+08	215160000	2.0351e+08
A0A2R8YDJ1	ATP5S	2.02842e+08	1.22257e+08	3.33397e+07	6.17237e+07	172630000	1.21563e+08
A0A2R8YDQ9	SUCLA2	1.49203e+09	1.29268e+09	1.57174e+09	1.57663e+09	1384500000	1.57517e+09
A0A2R8YEU9	RNASEH2B	9.12688e+07	6.08515e+07	8.09233e+07	9.29352e+07	90817000	7.56544e+07
A0A2R8YEX5	SLC33A1	1.29291e+08	7.50851e+07	1.48237e+08	6.04955e+07	3.15095e+07	4.00381e+07
A0A2R8YF63	ANAPC1	3.48975e+07	3.2478e+07	5.30522e+07	7.58668e+07	3.47461e+07	3.62527e+07
A0A2R8YFA1	COL4A3BP	5.66351e+07	7.88892e+07	6.50959e+07	7.45112e+07	61626000	4.61876e+07
A0A2R8YFH5	SEC23B	7.61816e+08	8.33613e+08	6.43686e+08	8.38398e+08	914500000	6.45507e+08
A0A2R8YFK9	CHD4	8.84659e+09	5.47684e+09	6.48682e+09	6.21484e+09	6134400000	6.0974e+09
A0A2R8YFL3	IFNGR1	8.94836e+07	8.14987e+07	9.67924e+07	1.9517e+08	218130000	2.25755e+08
A0A2R8YGD1	TPP1	4.67213e+09	3.4324e+09	4.37054e+09	2.56752e+09	2456200000	1.30324e+09
A0A2R8YGH5	AP1S1	2.95095e+08	2.36547e+08	2.02718e+08	1.7054e+08	181080000	1.96345e+08
A0A2U3TZH3	EEF1A2	6.55115e+08	6.81302e+08	6.29394e+08	1.3208e+08	156020000	1.3223e+08
A0A2U3TZL8	KIF23	5.13202e+07	4.91904e+07	8.08363e+07	5.93765e+07	49439000	5.93853e+07
A0A2U3TZV8	PLCH1	1.71059e+08	2.36615e+08	2.39649e+08	2.5786e+08	287500000	2.53812e+08
A0A3B3IRE4	FAM45A	1.06459e+08	1.27396e+08	1.57609e+08	1.54925e+08	132610000	5.69129e+07
A0A3B3IRI2	CTPS1	6.3305e+09	5.69654e+09	5.39662e+09	6.06047e+09	6707400000	5.98369e+09
A0A3B3IRL2	CREG1	3.8497e+08	3.5503e+08	2.07552e+08	4.72822e+07	274390000	2.29623e+08
A0A3B3IRL5	IMPDH1	1.89728e+08	1.67602e+08	2.59296e+08	2.5773e+08	244290000	1.27282e+08
A0A3B3IRR6	C8orf33	1.0077e+08	1.15548e+08	9.2273e+07	6.60319e+07	118700000	1.29066e+08
A0A3B3IRT8	SSR1	3.01885e+09	2.83716e+09	3.306e+09	2.20957e+09	2126200000	2.96011e+09
A0A3B3IRU2	NA	1.66371e+08	2.75475e+08	3.08157e+08	5.66351e+07	222400000	3.23448e+08
A0A3B3IRX2	PLA2G2A	3.55857e+08	3.76727e+08	3.0385e+08	2.25716e+08	218370000	2.3753e+08
A0A3B3IS32	MALT1	2.32814e+08	1.76964e+08	4.0054e+07	8.94959e+07	146900000	1.38475e+08
A0A3B3IS55	ABLIM1	1.15635e+08	1.11296e+08	2.02129e+08	1.95121e+08	176250000	1.70945e+08
A0A3B3ISD4	ABCB11	7.78833e+07	1.00589e+08	8.82141e+07	1.26505e+08	7.58668e+07	1.03807e+08
A0A3B3ISG5	IDE	4.40436e+09	3.42528e+09	3.22764e+09	3.72784e+09	5591700000	4.05742e+09
A0A3B3ISR7	DDX10	1.19698e+08	1.07288e+08	1.09566e+08	1.24183e+08	115700000	1.4639e+08
A0A3B3ISU2	ALG11	5.85516e+07	3.62264e+07	4.66456e+07	3.76166e+07	3.43305e+07	3.61471e+07
A0A3B3ISV4	VKORC1L1	5.33148e+07	7.03955e+07	6.78357e+07	6.29854e+07	6.91211e+07	2.94053e+07
A0A3B3IT57	NDUFB9	9.56316e+08	9.49834e+08	1.16158e+09	1.02373e+09	989190000	8.19504e+08
A0A3B3ITT5	RPL29	3.47691e+09	3.31674e+09	3.35307e+09	3.40037e+09	3577000000	3.41646e+09
A0A3B3ITW3	ABCD3	4.53182e+09	4.09776e+09	3.78566e+09	4.4651e+09	4119800000	3.95911e+09
A0A3B3ITZ9	THRAP3	6.50101e+09	6.48234e+09	6.42117e+09	6.62258e+09	6581200000	6.46944e+09
A0A3B3IU42	GEMIN2	5.55095e+08	6.1576e+08	6.32131e+08	7.17304e+08	594300000	3.50933e+08
A0A3B3IU45	MCM4	6.43011e+09	6.44079e+09	6.49697e+09	7.12911e+09	7087500000	6.42577e+09
A0A3B3IU55	STON2	9.50476e+08	8.99739e+08	7.94771e+08	5.41116e+08	450170000	5.04995e+08
A0A3B3IUA2	NHP2L1	6.5011e+09	7.00893e+09	7.37459e+09	5.53047e+09	5876700000	6.91894e+09
A0A3B3IUB5	HM13	2.50983e+09	2.06804e+09	2.69128e+09	1.58397e+09	1802600000	2.50911e+09
A0A3B3IUB9	BIRC6	2.87929e+07	2.16136e+07	3.3645e+07	7.58486e+07	26510000	1.87847e+07
A0A3B3IUC4	GLA	1.07936e+08	2.19218e+08	4.48864e+07	1.04427e+08	92905000	5.568e+07
A0A494BZT8	TACC3	2.58432e+08	3.5149e+08	2.09812e+08	2.32269e+08	273190000	2.30731e+08
A0A494BZW2	LRBA	1.99563e+08	1.69182e+08	3.41532e+08	2.71047e+08	240690000	2.34544e+08
A0A494BZZ6	NTHL1	7.51631e+07	9.00071e+07	1.75806e+08	1.45577e+08	3.90923e+07	4.50476e+07
A0A494C001	RBM15	7.06776e+08	6.48204e+08	8.0566e+08	6.59381e+08	696320000	6.12116e+08
A0A494C017	MYADM	3.93771e+08	2.62818e+08	4.74574e+08	2.28724e+08	162580000	1.68964e+08
A0A494C039	HYOU1	2.03743e+10	2.1794e+10	2.0728e+10	2.45276e+10	22834000000	2.2859e+10
A0A494C050	NKAP	8.07913e+07	8.54111e+07	2.66268e+07	6.76749e+07	76823000	8.43899e+07
A0A494C079	TBK1	5.05811e+07	5.43247e+07	7.12168e+07	7.68886e+07	99197000	6.27779e+07
A0A494C0M9	PPOX	9.00258e+07	1.31336e+08	7.53806e+07	6.91819e+07	117380000	1.04699e+08
A0A494C0R8	CLUH	2.87871e+09	3.04701e+09	2.71404e+09	3.84936e+09	4188100000	3.69215e+09
A0A494C108	KRI1	4.92715e+09	2.84437e+09	3.22303e+08	2.34885e+09	4672400000	4.29311e+09
A0A494C1E9	NFKB1	1.38843e+08	1.92557e+08	8.91606e+07	4.84846e+07	196920000	2.01613e+08
A0A494C1F2	NUP214	6.49868e+08	8.99076e+08	1.04245e+09	9.89826e+08	834410000	9.575e+08
A0A494C1L1	LBR	1.18113e+09	6.94886e+08	1.74185e+09	7.17035e+08	488420000	1.45686e+09
A0A494C1N0	FKBP2	9.16191e+08	8.78578e+08	1.00237e+09	1.04036e+09	1054800000	8.90633e+08
A0A494C1S7	GTF3C3	2.35876e+08	1.78329e+08	2.11322e+08	2.13882e+08	186440000	2.81221e+08
A0A499FI31	SART3	2.72405e+09	2.50082e+09	2.42616e+09	2.16009e+09	2563400000	2.46554e+09
A0A499FIX8	ESYT2	4.13725e+08	7.08392e+08	5.62754e+08	3.63607e+08	353040000	3.70474e+08
A0A499FIZ0	WDR26	3.49217e+08	7.05456e+08	4.85889e+08	4.2915e+08	512690000	5.59645e+08
A0A499FJN5	FECH	4.04249e+08	4.67896e+08	5.31945e+08	4.46094e+08	360430000	5.46489e+08
A0A590UJ73	TSEN34	1.05984e+08	1.08117e+08	1.49073e+08	5.76145e+07	147510000	5.93139e+07
A0A590UJK4	SRSF6	4.84206e+09	5.14138e+09	4.41676e+09	6.27156e+09	6327900000	5.62556e+09
A0A590UJR3	CUL1	7.96093e+08	1.02276e+09	7.62461e+08	8.33589e+08	1015600000	1.11628e+09
A0A590UK44	ITCH	3.7823e+07	2.52822e+07	1.1904e+08	1.34566e+08	60674000	4.04691e+07
A0A5F9UN28	KCNAB2	2.32772e+08	2.37005e+08	2.25272e+08	2.02766e+08	222910000	1.93829e+08
A0A5F9UP49	SDF4	2.55646e+09	2.56294e+09	3.25484e+09	3.1791e+09	3372300000	3.21054e+09
A0A5F9UY30	TGOLN2	4.14075e+08	5.03265e+08	4.58662e+08	3.79858e+08	433630000	3.85037e+08
A0A5F9W493	CSNK1A1	3.51036e+08	3.84109e+08	2.50965e+08	2.29001e+08	321060000	2.87672e+08
A0A5F9YFS9	SPCS1	1.15027e+09	8.08327e+08	1.06232e+09	6.72169e+08	750460000	8.71149e+08
A0A5F9ZH75	OSBPL10	4.89887e+07	6.17867e+07	5.04419e+07	5.29151e+07	66662000	6.86551e+07
A0A5F9ZH82	ACP2	1.47752e+08	1.84775e+08	1.93551e+08	1.34941e+08	150410000	1.39094e+08
A0A5F9ZHB6	PRIM1	7.50121e+07	8.9109e+07	1.39573e+08	1.43661e+08	150490000	1.32437e+08
A0A5F9ZHN7	SACM1L	3.23416e+08	2.52822e+08	3.84936e+08	4.11603e+08	370060000	4.31358e+08
A0A5F9ZHY7	BRI3BP	9.78839e+07	5.66583e+07	1.41765e+08	1.35935e+08	4.34789e+07	1.94862e+08
A0A5F9ZI63	EED	1.08853e+08	4.13335e+07	3.97275e+07	4.67847e+07	148600000	1.10934e+08
A0A5H1ZRP4	NELFB	3.73042e+08	2.61833e+08	2.29689e+08	9.67332e+07	246340000	2.04862e+08
A0A5H1ZRS1	PCM1	4.56577e+08	6.01562e+08	5.65713e+08	4.94049e+08	572200000	6.2591e+08
A0A5K1VW81	CEP290	3.7612e+08	4.07865e+07	6.06669e+08	3.36541e+08	24283000	4.39603e+07
A0A669KAX3	WFS1	1.84339e+08	1.57334e+08	3.72963e+08	1.81983e+08	188130000	2.80555e+08
A0A669KAX4	CUL4B	1.34663e+08	5.91762e+07	1.17514e+08	1.056e+09	222740000	1.84448e+08
A0A669KB10	GBF1	1.71885e+09	1.79402e+09	2.01993e+09	1.69839e+09	1422500000	1.47724e+09
A0A669KBH4	CUL7	6.15366e+07	6.33908e+07	4.37745e+07	6.94997e+07	53355000	4.52204e+07
A0A6I8PIX7	SVIL	7.42596e+07	5.71556e+07	4.78334e+07	1.4684e+08	62643000	8.09504e+07
A0A6I8PRU6	KRTCAP2	5.81297e+07	6.78571e+07	8.36051e+07	4.92069e+07	53470000	7.59802e+07
A0AVT1	UBA6	2.63854e+09	2.42056e+09	2.38796e+09	2.50199e+09	2650300000	2.16872e+09
A0MZ66	KIAA1598	1.46392e+09	1.5867e+09	1.97746e+09	1.68592e+09	1871900000	1.57273e+09
A1L0T0	ILVBL	1.28674e+09	1.0995e+09	1.16354e+09	1.21012e+09	1173900000	1.5887e+09
A2A2Q9	AAR2	1.33537e+08	1.88412e+08	2.16438e+08	2.53117e+08	143190000	1.17601e+08
A2A3R5	RPS6	9.6032e+07	2.88348e+07	2.6642e+07	4.44014e+07	4.8352e+07	2.76921e+07
A2IDA3	MPG	1.98796e+08	1.09687e+08	1.12721e+08	8.39457e+07	95280000	1.07948e+08
A2IDC6	MRPL28	2.88305e+08	4.09805e+08	2.73766e+08	1.91005e+08	398400000	4.21612e+08
A3KMH1-2	VWA8	1.79851e+08	1.46139e+08	1.4996e+08	1.6283e+08	175070000	2.14064e+08
A4D1E9-2	GTPBP10	1.84673e+08	1.87223e+08	2.06188e+08	2.0028e+08	68053000	2.01876e+08
A5YKK6-2	CNOT1	9.87765e+08	1.11832e+09	9.28273e+08	7.94575e+08	1065300000	1.02595e+09
A6NCS6	C2orf72	2.9532e+08	2.29204e+08	1.92408e+08	2.65774e+08	381840000	3.56041e+08
A6ND22	MRPS16	6.25067e+08	5.87003e+08	5.90928e+08	5.67473e+08	577030000	4.96769e+08
A6NDG6	PGP	7.38667e+08	9.87163e+08	6.50132e+08	8.21608e+08	721910000	6.88466e+08
A6NEM5	PIGK	1.12958e+08	2.08345e+08	2.32017e+08	3.71736e+07	139180000	1.52945e+08
A6NEP9	TSPAN14	2.60301e+08	9.88918e+07	1.15092e+08	1.04614e+08	4.96173e+07	6.57432e+07
A6NFX8	NUDT5	5.45877e+09	5.31779e+09	5.59164e+09	4.95426e+09	6923600000	5.32263e+09
A6NHL2-2	TUBAL3	8.02825e+08	7.27193e+08	8.84187e+08	1.02609e+09	849750000	8.64736e+08
A6NHQ2	FBLL1	8.32655e+08	7.44356e+08	8.21811e+08	7.80255e+08	667870000	7.74535e+08
A6NHR9	SMCHD1	8.3052e+08	6.53441e+08	8.75575e+08	5.37986e+08	705910000	8.12461e+08
A6NIH7	UNC119B	1.15494e+08	1.72254e+08	6.04484e+07	9.58204e+07	61445000	6.04961e+07
A6NJX6	CHCHD1	1.055e+08	9.36113e+07	1.01968e+08	1.11077e+08	78116000	8.90248e+07
A6NLH6	CNIH4	1.88227e+08	1.98642e+08	3.00491e+08	1.686e+08	131820000	1.38794e+08
A6NMA8	CRYZL1	9.79423e+07	1.26304e+08	1.0051e+08	9.3359e+07	64815000	8.2064e+07
A6NMQ3	ENSA	3.15324e+08	4.11658e+08	4.00711e+08	4.34505e+08	91093000	2.96734e+08
A6NNI4	CD9	8.00639e+07	8.06143e+07	2.18621e+08	1.37663e+08	83702000	8.90492e+07
A6NNK5	TP53BP1	1.50938e+08	1.69045e+08	1.5384e+08	7.63164e+07	153200000	1.39921e+08
A6NNY8	USP27X	1.7337e+08	1.2212e+08	3.03282e+07	3.85309e+07	84559000	3.10865e+07
A8CG34-2	POM121C	1.00445e+08	6.86567e+07	1.93926e+08	3.18986e+08	85890000	3.17298e+08
A8K7Q2	HSPA8	2.25457e+08	3.38169e+08	1.70127e+08	4.03282e+08	276890000	3.90709e+08
A8MTF7	RBM33	9.85179e+07	6.3501e+07	8.91606e+07	7.65487e+07	74547000	6.64212e+07
A8MUM1	TSSC1	2.32964e+08	3.39193e+08	2.705e+08	1.56685e+08	269950000	2.70329e+08
A8MX49	PPM1F	1.55001e+08	8.52093e+07	6.32847e+07	4.31909e+07	93695000	3.66408e+07
A8MX75	ERCC2	4.12223e+08	3.1576e+08	2.8648e+08	2.62856e+08	212030000	3.24847e+08
A8MZH8	PTTG1IP	2.8113e+08	4.77959e+08	4.32381e+08	5.41531e+08	501720000	5.16028e+08
A9Z1X7	SRRM1	2.21736e+09	2.35806e+09	1.96049e+09	2.13442e+09	2457100000	2.02458e+09
B0QY91	MICALL1	1.01463e+08	8.59904e+07	4.04819e+07	1.07459e+08	104840000	5.86289e+07
B0QYK0	EWSR1	3.33918e+09	2.89069e+09	3.06127e+09	3.15294e+09	2956100000	3.00687e+09
B1AJY5	PSMD10	9.83594e+08	8.19785e+08	9.91289e+08	7.28608e+08	1052400000	7.59755e+08
B1AK53	ESPN	5.21336e+08	5.16459e+08	4.63881e+08	1.7499e+08	159080000	1.92786e+08
B1AK63	MEAF6	1.68673e+08	1.33169e+08	1.56909e+08	1.54566e+08	133000000	1.21845e+08
B1AKI6	MBNL3	1.05508e+09	3.80267e+08	8.19269e+08	5.98623e+08	375350000	3.54116e+08
B1AKM8	PISD	3.24717e+08	8.07537e+07	1.40349e+08	7.79049e+07	204670000	2.25557e+08
B1AL79	PKN2	1.22326e+08	8.50123e+07	1.36018e+08	1.88022e+08	122760000	1.52851e+08
B1ALA9	PRPS1	2.95487e+09	2.8824e+09	2.58929e+09	3.29059e+09	4058300000	2.73005e+09
B1ALK7	ARHGEF7	4.75363e+08	2.80722e+08	3.37081e+08	2.87461e+08	340920000	2.41783e+08
B1AMS2	SEPT6	1.44023e+08	1.06576e+08	1.10248e+08	9.43452e+07	73507000	1.0639e+08
B1ANH0	GUK1	3.43086e+08	2.14927e+08	2.12191e+08	2.01388e+08	369780000	2.48554e+08
B2WTI3	JMJD6	5.29878e+08	6.07198e+08	6.32037e+08	6.71191e+08	634850000	5.0645e+08
B3KPJ4	PHC2	2.90932e+08	1.88919e+08	1.85075e+08	2.86956e+08	274470000	3.11194e+08
B3KS98	EIF3H	3.47182e+09	3.88614e+09	4.65313e+09	4.81791e+09	5126600000	4.65059e+09
B3KTM8	MORF4L1	8.69727e+08	6.64109e+08	9.33901e+08	9.91782e+08	884660000	1.04839e+09
B3KVN2	FNTA	2.86895e+08	2.87411e+08	1.20157e+08	1.29154e+08	257220000	1.19347e+08
B3KY94	CDIPT	2.61752e+08	2.9453e+08	3.42837e+08	2.26629e+08	130880000	2.32872e+08
B4DDF4	CNN2	2.30036e+09	3.13751e+09	2.21537e+09	2.20606e+09	2504200000	2.42075e+09
B4DEE8	MGMT	8.07229e+08	1.03095e+09	5.68919e+08	9.50298e+08	932710000	8.75299e+08
B4DER1	LARS	4.27764e+09	3.96552e+09	4.38069e+09	3.78709e+09	4210100000	3.64117e+09
B4DGG1	ITFG3	5.1493e+07	4.35079e+07	6.13508e+07	3.80127e+07	3.95963e+07	3.23584e+07
B4DHE8	MSI2	8.84659e+08	8.79134e+08	8.30031e+08	6.36015e+08	796920000	6.00886e+08
B4DKB2	ECE1	4.45916e+08	4.39606e+08	3.81474e+08	6.32877e+08	660770000	8.84858e+08
B4DLN1	NA	7.55301e+09	9.55558e+09	6.54626e+09	8.65211e+09	8992400000	1.01168e+10
B4DR61	SEC61A1	2.81931e+09	3.24507e+09	3.20743e+09	2.87779e+09	2107900000	3.48191e+09
B4DR80	STK24	8.37777e+08	1.11686e+09	1.00783e+09	9.30819e+08	963060000	9.91491e+08
B4DUC8	MTAP	3.48091e+09	2.86485e+09	2.99305e+09	3.36736e+09	2974300000	2.3075e+09
B4DXZ6	FXR1	2.72889e+09	2.62311e+09	2.83411e+09	2.69881e+09	2500000000	2.36844e+09
B4DY08	HNRNPC	3.33393e+10	3.39398e+10	3.73381e+10	3.7232e+10	37338000000	3.63074e+10
B4DY09	ILF2	1.43673e+10	1.4375e+10	1.16345e+10	1.31762e+10	13017000000	1.45996e+10
B4E0K5	MAPK14	2.24748e+08	1.05143e+08	1.84179e+08	1.87199e+08	162090000	1.44071e+08
B4E1G1	DERL1	4.35638e+07	3.85165e+07	2.44023e+08	2.15903e+08	55286000	5.9373e+07
B4E3T4	RBPMS	1.6743e+08	1.99168e+08	1.42891e+08	1.41322e+08	166430000	1.4101e+08
B5MC22	MTFP1	1.28474e+08	5.26064e+07	6.3075e+07	4.90104e+07	37993000	6.59226e+07
B5MCF9	PES1	2.78795e+09	2.74373e+09	2.74551e+09	2.79792e+09	2869500000	2.92048e+09
B5MCK8	GGT2	4.82646e+08	7.31688e+08	6.80446e+08	7.00604e+08	844560000	8.80849e+08
B5MCN0	ATL2	7.11781e+08	7.08011e+08	8.33433e+08	8.32367e+08	620250000	8.93676e+08
B5MD17	CBX1	1.17045e+08	4.09912e+08	1.45355e+08	2.97657e+08	371960000	5.7203e+08
B5MD87	PYCRL	3.2606e+07	4.88823e+07	3.83195e+07	7.3415e+07	41146000	7.29219e+07
B5MDF5	RAN	3.44854e+10	3.4363e+10	3.78387e+10	3.84504e+10	39375000000	3.56417e+10
B7WP74	CWC22	5.25131e+07	4.4024e+07	4.10799e+07	6.35648e+07	2.31591e+07	5.95008e+07
B7WPG3	HNRNPLL	2.58115e+09	2.09983e+09	2.54162e+09	2.3235e+09	2108900000	2.12834e+09
B7Z2Y2	COG2	1.84523e+08	1.23798e+08	1.3618e+08	1.47035e+08	104620000	9.98158e+07
B7Z3Z9	ACSL1	2.68851e+08	1.66959e+08	2.79215e+08	1.05674e+08	184150000	2.05885e+08
B7Z6D5	DDX27	2.98006e+09	2.58624e+09	3.24537e+09	2.55684e+09	2731200000	2.76996e+09
B7Z6J7	CNOT3	1.10138e+08	1.04148e+08	9.02606e+07	1.47084e+08	167750000	1.43442e+08
B7Z7F3	RANBP3	2.22629e+09	2.27117e+09	1.66187e+09	2.27607e+09	1362400000	1.88129e+09
B7Z7P8	ETF1	5.0501e+09	4.64239e+09	5.57049e+09	5.58867e+09	5567800000	5.63373e+09
B7Z8V7	NADK2	6.67319e+08	7.50626e+08	7.91198e+08	5.29689e+08	578820000	6.36493e+08
B7ZBQ1	MED20	5.9748e+07	6.78142e+07	8.44186e+07	7.6455e+07	44727000	5.26019e+07
B7ZC39	SH3GLB2	9.38047e+07	7.58506e+07	4.54144e+07	3.95683e+07	44091000	1.36249e+08
B7ZCJ6	VARS2	1.44265e+08	1.41516e+08	3.43004e+07	4.55279e+07	145740000	1.31272e+08
B7ZKQ9	SCARB1	7.32494e+08	7.63235e+08	7.92775e+08	1.21143e+09	941770000	9.67735e+08
B7ZLQ5	SMARCA1	1.07244e+09	9.92429e+08	9.39614e+08	7.6781e+08	885470000	9.29001e+08
B8ZZ77	PPIL3	6.06265e+08	5.51536e+08	7.95027e+08	8.22423e+08	548280000	7.32778e+08
B8ZZF0	PPM1B	1.17713e+08	6.0634e+07	4.15742e+07	5.18399e+07	3.43004e+07	4.39847e+07
B8ZZF8	LSM5	8.46453e+08	8.22457e+08	7.22332e+08	1.0353e+09	1079800000	2.80529e+07
B8ZZN6	SUMO1	1.04499e+09	1.13373e+09	1.05703e+09	7.84607e+08	991940000	8.53496e+08
B8ZZQ6	PTMA	1.02555e+10	1.36358e+10	1.356e+10	1.41591e+10	13156000000	1.23807e+10
B8ZZS4	ANKZF1	1.0253e+08	1.80338e+08	1.51205e+08	1.48592e+08	136810000	1.34127e+08
B8ZZU8	TCEB2	3.11779e+09	3.2556e+09	2.64412e+09	2.73035e+09	3046100000	2.99879e+09
B9A061	CAPS2	1.72352e+08	1.78846e+08	1.07068e+08	8.65293e+07	133040000	1.21873e+08
B9ZVN9	POLR1A	1.96894e+08	1.69933e+08	9.45583e+07	1.4468e+08	202380000	2.80686e+08
B9ZVT1	RBM12B	2.48897e+08	2.44202e+08	1.49559e+08	1.10931e+08	249190000	1.09093e+08
C9IY88	HAAO	7.58496e+07	1.19653e+08	1.22945e+08	1.34607e+08	51975000	4.26776e+07
C9J0I9	ZC3HC1	1.30592e+08	1.19263e+08	6.80011e+07	7.11884e+07	50974000	6.95246e+07
C9J0J7	PFN2	1.15452e+09	1.16055e+09	1.20421e+09	1.40646e+09	1063000000	8.79365e+08
C9J128	INPP1	5.08331e+07	9.77997e+07	8.89474e+07	1.02487e+08	76097000	9.48861e+07
C9J1Z8	ARF5	5.32906e+08	8.70552e+08	7.81494e+08	6.60685e+08	967620000	8.06151e+08
C9J2G0	BRE	8.93585e+07	8.87735e+07	5.6202e+07	7.03196e+07	65333000	9.96844e+07
C9J2P0	UBE2E1	1.23752e+08	1.98252e+08	1.56321e+08	7.34884e+07	125480000	7.87531e+07
C9J2Q2	ATPAF2	4.86525e+07	5.67285e+07	5.4529e+07	4.14341e+07	4.78429e+07	3.95057e+07
C9J2Y9	POLR2B	2.29953e+09	2.42944e+09	2.33552e+09	2.4394e+09	2277500000	2.17895e+09
C9J4K0	C2orf49	1.06935e+08	8.60967e+07	4.09612e+07	1.12854e+08	102730000	7.78094e+07
C9J4Z3	RPL37A	4.19297e+09	4.06216e+09	3.61349e+09	3.48644e+09	4150400000	4.31527e+09
C9J5N1	PTGES3L-AARSD1	7.461e+07	8.1331e+07	1.5395e+08	1.48861e+08	181670000	1.28934e+08
C9J660	SUMF2	4.93449e+08	6.76406e+08	6.00077e+08	4.64766e+08	641990000	5.72115e+08
C9J6N5	FAM107B	9.27286e+07	4.3513e+08	4.24997e+08	4.43307e+08	410500000	3.72502e+08
C9J712	PFN2	2.19817e+08	1.62346e+08	2.36707e+08	2.46637e+08	101830000	1.25779e+08
C9J7E5	TNPO3	3.58869e+08	4.0332e+08	4.69517e+08	5.16649e+08	362260000	5.34996e+08
C9J7K9	PLSCR1	3.33659e+07	4.51649e+08	1.261e+08	9.16964e+08	900190000	9.26128e+08
C9J880	GLT8D1	5.99516e+07	5.53779e+07	5.04828e+07	6.0383e+07	70506000	5.88707e+07
C9J8E6	SNX8	3.85845e+07	5.43637e+07	4.03491e+07	5.44694e+07	6.90609e+07	4.15742e+07
C9J8T4	RNF13	8.7273e+07	7.88473e+07	6.68176e+07	4.84139e+07	55701000	6.38746e+07
C9J979	CPSF3L	3.82943e+07	4.34837e+07	3.86778e+07	4.41432e+07	61944000	4.82938e+07
C9J9K3	RPSA	4.05825e+10	3.87932e+10	3.70311e+10	4.19663e+10	43885000000	4.18569e+10
C9JA08	NMD3	6.36846e+08	6.86577e+08	6.12996e+08	8.25847e+08	960380000	6.82447e+08
C9JA28	SSR3	5.73314e+08	4.44609e+08	5.93716e+08	5.31686e+08	436740000	5.82181e+08
C9JA93	TBC1D15	3.54598e+07	4.54965e+07	3.77841e+07	4.01538e+07	36452000	3.78878e+07
C9JAG1	EPT1	4.54121e+07	1.72936e+08	1.97507e+08	2.10785e+08	221380000	2.57906e+08
C9JAW5	HIGD1A	9.75669e+08	6.64977e+08	7.80053e+08	5.56739e+08	734860000	6.3776e+08
C9JAX1	FXN	8.23429e+08	8.15095e+08	4.82606e+08	6.12013e+08	365240000	6.10013e+08
C9JE27	RFFL	4.97811e+07	3.65152e+07	3.40463e+07	6.80319e+07	56740000	4.44767e+07
C9JEH7	RPS4Y1	2.18166e+09	2.36478e+09	1.25725e+09	2.04917e+09	2430000000	2.32825e+09
C9JES6	CAMK1	5.27926e+07	5.1722e+07	3.32928e+07	4.04586e+07	56818000	4.01677e+07
C9JEU5	FGG	2.2066e+09	2.38097e+09	2.42395e+09	3.09939e+09	2943400000	2.99081e+09
C9JEV9	CPSF4	1.22851e+08	1.70752e+08	1.51034e+08	1.08013e+08	148760000	1.20821e+08
C9JFE4	GPS1	1.137e+09	9.79947e+08	6.65413e+08	1.16073e+09	1242200000	1.23723e+09
C9JG87	MRPL39	1.38359e+09	1.16416e+09	1.37655e+09	1.36758e+09	1212400000	1.11873e+09
C9JG97	AAMP	1.18497e+09	1.31453e+09	1.11152e+09	9.36035e+08	1126600000	1.25159e+09
C9JGI3	TYMP	5.2544e+07	2.55367e+07	1.32018e+08	9.24218e+07	120360000	6.08689e+07
C9JIF9	APEH	4.20841e+09	3.58131e+09	3.16454e+09	3.03639e+09	4170200000	3.67816e+09
C9JJ19	MRPS34	3.21547e+08	5.667e+08	5.89163e+08	4.63519e+08	306400000	3.02865e+08
C9JJM7	HACL1	1.60573e+08	1.54623e+08	1.2749e+08	8.52823e+07	117830000	1.12333e+08
C9JJU1	SLC38A5	4.90496e+07	4.37968e+07	6.31133e+07	7.92529e+07	68139000	6.41169e+07
C9JK83	STAMBP	3.40775e+08	4.20385e+08	3.6401e+08	3.53729e+08	329400000	2.26966e+08
C9JKQ2	NDUFB3	2.08523e+08	2.49809e+08	2.06981e+08	1.77183e+08	222060000	2.29849e+08
C9JLU1	POLR2H	6.57284e+08	9.19213e+08	1.25316e+09	6.70914e+08	942450000	7.64676e+08
C9JMC5	ALDH3A1	1.18789e+08	1.33081e+08	1.10888e+08	1.76204e+08	231870000	1.83866e+08
C9JME2	FARP1	8.42616e+08	7.50256e+08	6.8616e+08	8.08088e+08	607020000	6.92936e+08
C9JN15	PPIG	1.20691e+09	1.18737e+09	7.36325e+08	1.12406e+09	757790000	8.31457e+08
C9JNK6	MTX2	1.00086e+09	6.35205e+08	7.18759e+08	8.06213e+08	903740000	8.01644e+08
C9JP00	MBNL1	2.94795e+08	2.09281e+08	1.98659e+08	1.48136e+08	94777000	1.01797e+08
C9JP16	CRTAP	3.05572e+08	2.79093e+08	1.55229e+08	2.81186e+08	266130000	3.25251e+08
C9JQV0	C7orf50	4.84247e+08	8.21833e+08	8.97234e+08	8.0138e+08	678750000	8.46256e+08
C9JRZ6	CHCHD3	1.22184e+09	1.25982e+09	1.38985e+09	1.33001e+09	1074400000	1.2069e+09
C9JS65	ATG9A	1.5722e+08	1.37694e+08	1.10393e+08	9.57063e+07	3.52694e+07	4.96173e+07
C9JTN7	TIA1	4.56319e+08	4.43897e+08	3.46572e+08	3.94651e+08	473310000	4.53077e+08
C9JTY5	PCBP4	1.2532e+08	1.17069e+08	5.42519e+07	1.08494e+08	69105000	4.71923e+07
C9JU35	TIMMDC1	2.16364e+08	1.05747e+08	3.58169e+07	4.20478e+07	226510000	1.09441e+08
C9JUM0	LDAH	2.06579e+08	1.82581e+08	2.11185e+08	1.88055e+08	181440000	1.5424e+08
C9JVE2	DCUN1D1	1.99647e+08	2.36605e+08	2.28205e+08	1.5816e+08	218170000	2.4968e+08
C9JW33	UXS1	3.64308e+08	3.72514e+08	3.11269e+08	1.8521e+08	350010000	3.25552e+08
C9JX57	C21orf59	1.67247e+08	1.50186e+08	1.45039e+08	4.84916e+07	141560000	3.7931e+08
C9JXB8	RPL24	6.52604e+09	5.33739e+09	6.67945e+09	6.68933e+09	7183300000	7.21068e+09
C9JXC3	OARD1	1.60607e+08	1.68938e+08	1.78185e+08	1.94664e+08	288040000	1.88627e+08
C9JY28	LYRM4	7.36465e+07	1.73736e+08	2.00202e+08	7.74917e+07	147180000	1.62795e+08
C9JYJ6	FILIP1L	4.85891e+07	4.39401e+07	4.73806e+07	1.97696e+07	22028000	5.04485e+07
C9JYM0	POP7	9.30206e+07	7.49183e+07	1.67304e+08	1.30776e+08	116070000	1.33798e+08
C9JYN0	SYPL1	2.6594e+08	3.37399e+08	3.09436e+08	2.72106e+08	330030000	3.2019e+08
C9JZ99	PON3	4.79791e+07	5.72161e+07	5.01682e+07	4.09394e+07	6.16226e+07	5.53812e+07
C9K0C3	LCLAT1	1.30834e+08	2.0303e+08	1.36845e+08	1.42178e+08	109360000	2.23924e+08
D3YTB1	RPL32	1.40778e+10	1.2136e+10	1.22894e+10	1.4142e+10	15477000000	1.35197e+10
D6R938	CAMK2D	9.72583e+08	6.33723e+08	1.06607e+09	1.45389e+09	1201900000	1.34108e+09
D6R9C5	SPP1	5.95078e+07	5.28229e+07	2.66317e+07	1.21534e+08	97064000	1.26624e+08
D6R9Z7	COX7C	2.96997e+08	2.89176e+07	2.86165e+08	2.03646e+08	260360000	5.02184e+07
D6RAN8	MRPL27	4.27498e+08	4.38172e+08	5.16946e+08	4.98475e+08	198240000	5.31212e+08
D6RAX1	DTNBP1	3.73525e+07	6.99839e+07	3.16249e+07	3.07323e+07	48544000	3.9746e+07
D6RB01	FAM169A	2.22829e+09	2.12148e+09	2.64335e+09	2.19139e+09	2021400000	1.96092e+09
D6RB92	PSMG4	2.97873e+08	5.00856e+08	2.97728e+08	3.17404e+08	414700000	2.78564e+08
D6RBL4	METTL14	5.82465e+07	8.60518e+07	5.72969e+07	6.33439e+07	4.50003e+07	5.54336e+07
D6RBN9	RELL1	6.70314e+07	6.79927e+07	9.70653e+07	5.99641e+07	51560000	7.67108e+07
D6RBR7	ZNF330	1.49637e+08	1.5552e+08	1.80027e+08	1.46962e+08	203550000	4.04292e+07
D6RBS9	RBM47	4.80685e+07	5.84877e+07	4.23905e+07	3.55514e+07	48621000	3.14544e+07
D6RC04	COMMD10	2.43367e+07	2.60077e+07	2.42523e+07	3.54984e+07	29445000	2.9232e+07
D6REA1	SIL1	1.00086e+08	1.07093e+08	3.5127e+07	3.85784e+07	47925000	4.50702e+07
D6REC6	CDK7	9.3446e+07	6.81633e+07	3.06905e+07	5.9424e+07	95827000	8.34725e+07
D6RFW1	SGTB	9.52896e+07	1.28205e+08	1.77886e+08	1.32862e+08	120510000	1.30953e+08
D6RGI3	SEPT11	2.54245e+09	2.73613e+09	2.92458e+09	2.57518e+09	2458400000	2.4307e+09
D6RGY8	YIPF3	3.47707e+08	3.02244e+08	3.29193e+08	2.74771e+08	320070000	2.88752e+08
D6RHI7	CCNH	4.97161e+07	3.92983e+07	4.44737e+07	4.13249e+07	78906000	5.09352e+07
D6RHI9	RNASET2	1.60974e+09	1.56281e+09	1.99e+09	7.62537e+08	631400000	5.20404e+08
D6RIE3	COX7A2	1.08812e+09	9.39507e+08	1.03768e+09	6.88705e+08	1033600000	8.87262e+08
D6RIY6	EXOSC9	4.66362e+08	3.18412e+08	5.28381e+08	3.96591e+08	298930000	3.653e+08
D6RJE7	CALCOCO2	2.01307e+08	1.04889e+08	6.57824e+07	1.62732e+08	132780000	1.58513e+08
E2QRP0	NBN	8.08556e+07	7.63177e+07	4.59004e+07	6.86692e+07	74754000	8.24396e+07
E3W994	CLASP2	9.16998e+07	3.13893e+07	3.28562e+07	3.75205e+07	38553000	2.89043e+07
E5RFF9	GINS4	3.57659e+08	1.92713e+08	3.3859e+08	3.02425e+08	288630000	3.1803e+08
E5RFP0	NUDCD2	773845000	4.89895e+08	7.20217e+08	6.15754e+08	472900000	6.3591e+08
E5RG62	TATDN1	9.97191e+07	1.2488e+08	1.16217e+08	8.2226e+07	99853000	1.16502e+08
E5RGS2	REEP4	5.71457e+07	4.10732e+07	130005960	6.44597e+07	86608000	1.14417e+08
E5RGX5	STMN2	6.08191e+08	6.97694e+08	5.2468e+08	4.88295e+08	675890000	7.37247e+08
E5RH53	RMDN1	2.05294e+08	1.80845e+08	3.01045e+08	2.74176e+08	97926000	2.48554e+08
E5RHG8	TCEB1	1.97069e+09	1.96321e+09	2.63099e+09	2.46613e+09	2553700000	2.23191e+09
E5RHW4	ERLIN2	1.85883e+09	1.38191e+09	1.55596e+09	1.72015e+09	1786600000	1.63771e+09
E5RIA4	DNPEP	1.83005e+09	1.98105e+09	1.88724e+09	2.10027e+09	2193300000	1.97679e+09
E5RIS5	TVP23C	4.64496e+07	1.04168e+08	8.64404e+07	4.0943e+07	3.40247e+07	7.01763e+07
E5RIW3	TBCA	6.46481e+09	5.91762e+09	7.4788e+09	7.07418e+09	6035200000	5.67119e+09
E5RJR5	SKP1	7.70233e+09	6.81458e+09	6.52938e+09	6.59267e+09	5602300000	5.16122e+09
E5RJZ1	COX7A2L	5.12827e+08	4.32712e+08	6.65524e+08	5.77359e+08	508940000	5.79974e+08
E7EMB1	SWAP70	7.18572e+07	6.08008e+07	6.05654e+07	4.19028e+07	78729000	8.31035e+07
E7EMW7	UBR5	3.56718e+07	4.33493e+07	1.22962e+08	9.5201e+07	4.99552e+07	3.17327e+07
E7ENN3	SYNE1	1.4751e+09	1.54281e+09	1.74254e+09	1.57125e+09	1507300000	1.38822e+09
E7ENQ1	MAP4K4	1.34547e+09	1.52575e+09	1.34235e+09	1.20491e+09	1436600000	1.20079e+09
E7EPB3	RPL14	6.7149e+09	6.61554e+09	4.66115e+09	5.85827e+09	7970800000	7.49285e+09
E7EPF2	RBMS1	9.41134e+07	8.59036e+07	9.79351e+07	8.0856e+07	92796000	9.1239e+07
E7EPN9	PRRC2C	7.22984e+08	6.51588e+08	8.50189e+08	8.05642e+08	714220000	6.73254e+08
E7EPT4	NDUFV2	1.32653e+09	1.13656e+09	1.37808e+09	1.17271e+09	1117500000	1.17178e+09
E7EQ69	NAA50	1.63693e+09	1.62288e+09	1.36845e+09	1.93442e+09	1971100000	1.95763e+09
E7EQI7	KIAA0196	9.19194e+07	1.87934e+08	8.34388e+07	2.56846e+07	257750000	1.49874e+08
E7EQR4	EZR	1.39402e+10	1.40424e+10	1.51426e+10	1.54468e+10	16416000000	1.41752e+10
E7ES33	SEPT7	4.24928e+09	3.54152e+09	3.47706e+09	4.08547e+09	4186800000	3.16058e+09
E7ESL0	MRPL22	6.05981e+08	6.29042e+08	6.8535e+08	4.87162e+08	712310000	6.91847e+08
E7ESP4	ITGA2	2.27717e+08	3.1693e+08	2.75966e+08	2.05096e+08	297390000	3.33524e+08
E7ESY4	MTA1	4.8851e+07	5.0109e+07	7.03103e+07	5.35631e+07	53176000	5.93561e+07
E7ETK0	RPS24	7.56511e+09	8.64555e+09	8.11979e+09	1.02495e+10	8797400000	8.31335e+09
E7ETZ4	BZW2	8.14604e+08	7.04598e+08	8.15364e+08	1.28567e+09	1204700000	9.07122e+08
E7EV99	ADD1	9.2445e+08	1.09268e+09	7.52544e+08	7.65944e+08	1022200000	9.90646e+08
E7EVA0	MAP4	9.00342e+09	8.01472e+09	7.88827e+09	7.23783e+09	6798700000	7.00692e+09
E7EVC7	ATG16L1	1.00754e+08	1.18532e+08	8.17513e+07	6.39445e+07	95882000	9.39001e+07
E7EVK2	MTG1	1.21099e+08	1.48128e+08	8.13795e+07	6.25216e+07	121580000	1.20286e+08
E7EVQ6	SQLE	3.42986e+07	5.75223e+07	1.22562e+08	4.09737e+08	322740000	3.00631e+08
E7EW05	SDAD1	1.136e+08	8.70455e+07	3.6957e+07	3.28741e+07	120780000	9.64918e+07
E7EW69	SEPT10	1.91972e+08	1.15187e+08	1.21735e+08	9.50869e+07	154040000	1.13356e+08
E7EWK3	DHX36	1.5938e+08	1.1858e+08	5.73575e+07	5.86618e+07	87328000	3.47139e+07
E7EWP0	NDUFB5	1.75764e+08	1.34573e+08	1.6976e+08	1.03685e+08	101440000	1.10577e+08
E7EWR4	CSTF2	1.10755e+09	8.49664e+08	1.03444e+09	1.13848e+09	864690000	1.04943e+09
E7EX17	EIF4B	3.159e+09	3.07968e+09	2.96116e+09	3.46957e+09	4359400000	3.12396e+09
E7EX90	DCTN1	3.89383e+09	3.99205e+09	3.56745e+09	3.81056e+09	4062900000	3.40867e+09
E9PB61	ALYREF	5.97881e+07	5.68543e+07	9.7125e+07	8.20793e+07	66639000	3.08877e+07
E9PB93	POLR2D	4.21302e+07	9.73735e+07	4.9845e+07	7.16489e+07	75257000	6.95668e+07
E9PBP6	MTTP	2.33949e+09	2.55601e+09	2.55049e+09	3.38717e+09	2420900000	2.54498e+09
E9PC15	AGK	2.07104e+09	2.05809e+09	1.68609e+09	2.45969e+09	1786400000	2.54122e+09
E9PCH5	CAST	1.66955e+09	2.37883e+09	2.15756e+09	2.21307e+09	2442500000	2.23877e+09
E9PCS8	MTA3	2.13227e+08	2.62194e+08	2.49566e+08	2.01991e+08	221360000	1.01947e+08
E9PCW1	GOSR1	2.88613e+08	1.13519e+08	2.33313e+08	2.29164e+08	293980000	2.48497e+08
E9PD53	SMC4	4.23952e+09	3.97557e+09	3.81636e+09	4.79958e+09	1560300000	1.81669e+09
E9PDF2	OGDH	2.32647e+09	2.44426e+09	2.46053e+09	2.48846e+09	1985000000	2.58113e+09
E9PDF6	MYO1B	3.25985e+09	3.21845e+09	3.09802e+09	2.97583e+09	3550100000	3.3944e+09
E9PE17	MRPS17	3.95757e+08	8.26416e+08	7.00784e+08	7.76596e+08	312860000	4.90487e+08
E9PE82	ACADS	2.36184e+09	2.26951e+09	2.33816e+09	2.02741e+09	1903900000	2.11125e+09
E9PEQ6	PPIE	2.05928e+08	2.36664e+08	1.69862e+08	1.68731e+08	222010000	1.82298e+08
E9PER6	PDPK1	1.4786e+08	2.33426e+08	1.55144e+08	1.45161e+08	155490000	1.35207e+08
E9PES6	HMGB3	1.78709e+09	2.10822e+09	2.04901e+09	1.4719e+09	1350700000	2.22478e+09
E9PF10	NUP155	2.58924e+09	2.92804e+09	2.99979e+09	2.52236e+09	2633300000	2.44619e+09
E9PF18	HADH	5.69485e+09	5.08716e+09	5.18591e+09	5.54506e+09	6432100000	6.18041e+09
E9PF19	TBL2	1.36398e+09	1.55725e+09	1.10172e+09	8.33019e+08	1005700000	1.41113e+09
E9PFH2	KDM5D	1.35222e+08	1.00306e+08	1.63049e+08	2.3288e+08	101640000	2.33454e+08
E9PFK5	NOP14	5.74215e+08	4.28986e+08	4.03781e+08	4.88727e+08	464990000	5.45071e+08
E9PFW2	MANBA	1.27423e+08	9.07687e+07	8.53486e+07	4.35092e+07	46339000	5.21155e+07
E9PGM1	EIF4G1	1.24011e+10	1.3118e+10	1.26271e+10	1.60874e+10	15519000000	1.50043e+10
E9PGM4	GBE1	9.94855e+08	1.18366e+09	1.06727e+09	9.54862e+08	946710000	9.49049e+08
E9PGT1	TSN	6.60679e+09	6.40315e+09	6.5142e+09	6.41419e+09	4551000000	6.19215e+09
E9PGT3	RPS6KA1	8.19584e+08	6.70487e+08	5.76815e+08	6.74655e+08	556680000	3.90634e+08
E9PGT6	COPS8	8.35025e+08	7.33678e+08	6.27936e+08	8.10769e+08	792280000	8.23542e+08
E9PHA2	NCAPH	7.79517e+08	8.02066e+08	7.80326e+08	1.00115e+09	1269400000	1.07112e+09
E9PHH9	POLR3C	5.75441e+07	5.06678e+07	4.08411e+07	1.32618e+08	138350000	5.76828e+07
E9PHY5	EPB41L2	5.43767e+09	5.31379e+09	4.94954e+09	4.98784e+09	5063500000	4.58956e+09
E9PI26	GTF2H1	7.23819e+07	5.41102e+07	5.58052e+07	5.31327e+07	75646000	5.78575e+07
E9PIB2	GSDMD	6.07074e+07	8.99417e+07	4.12189e+07	8.40598e+07	159100000	1.34352e+08
E9PIC2	STX17	6.67469e+07	2.41495e+07	1.09123e+08	6.62935e+07	74836000	5.20317e+07
E9PIN3	NXF1	7.40636e+08	6.29959e+08	8.84187e+08	1.02324e+09	789570000	1.0452e+09
E9PIZ0	YIF1A	2.47137e+08	2.0697e+08	1.25802e+08	8.35545e+07	211610000	2.61549e+08
E9PJ81	UBXN1	1.08929e+09	6.67854e+08	1.26442e+09	1.17394e+09	1181800000	1.08924e+09
E9PJD9	RPL27A	7.0751e+09	7.37422e+09	7.6982e+09	8.04885e+09	8572800000	7.76451e+09
E9PK67	PARP10	5.50098e+07	4.43867e+07	5.07497e+07	4.37504e+08	352770000	2.78189e+08
E9PK91	BCLAF1	8.67641e+07	7.44814e+07	8.44195e+07	7.78462e+07	141410000	8.91272e+07
E9PKB0	SORL1	1.04382e+08	1.00891e+08	1.03248e+08	5.17456e+07	17858000	7.75981e+07
E9PKB5	PPM1A	1.25696e+08	1.32906e+08	1.02369e+08	6.39047e+07	148740000	1.65518e+08
E9PKM6	ASCC1	1.3996e+08	1.63477e+08	1.44963e+08	1.77484e+08	161410000	1.06689e+08
E9PKP7	UBTF	1.18664e+09	1.2487e+09	1.49695e+09	1.85113e+09	1967900000	1.79931e+09
E9PLK3	NPEPPS	9.98859e+09	1.09619e+10	1.03375e+10	1.14712e+10	12226000000	1.06154e+10
E9PLV6	GPAA1	5.00122e+07	7.15442e+07	7.1719e+07	4.69697e+07	4.53174e+07	4.41481e+07
E9PLV7	STX16	6.1625e+07	7.1632e+07	6.93246e+07	6.13513e+07	36317000	8.72548e+07
E9PM92	C11orf58	1.49153e+09	1.30721e+09	1.53029e+09	1.5252e+09	1533300000	1.41479e+09
E9PMG1	REPS1	9.48725e+07	8.16626e+07	9.48994e+07	9.05636e+07	61514000	1.11553e+08
E9PN17	ATP5L	2.30303e+09	1.93854e+09	2.7479e+09	2.07713e+09	2003100000	1.98402e+09
E9PN81	RNASEH2C	7.62266e+07	1.41692e+08	1.74458e+08	7.51078e+07	156040000	1.48015e+08
E9PNC7	DRAP1	2.69252e+08	2.17862e+08	2.21639e+08	1.75186e+08	185210000	1.75481e+08
E9PNW4	CD59	1.8821e+09	1.82357e+09	1.73461e+09	1.58894e+09	1090200000	1.91951e+09
E9PPF2	TYK2	1.36457e+08	1.21213e+08	1.19117e+08	1.66587e+08	119570000	1.6763e+08
E9PPW7	NDUFS8	1.058e+09	8.49762e+08	1.235e+09	1.29325e+09	1417000000	1.19112e+09
E9PQ57	RAE1	9.88265e+08	1.56485e+09	1.31217e+09	1.25666e+09	1653300000	1.34465e+09
E9PQ68	NDUFB8	2.48021e+08	3.53742e+08	4.00515e+08	3.66509e+08	268700000	3.0003e+08
E9PQD0	EIF1AD	1.03314e+08	1.681e+08	1.78867e+08	2.02888e+08	146420000	1.25141e+08
E9PR04	VPS28	3.53129e+08	2.6429e+08	3.51287e+08	3.17347e+08	166880000	1.27103e+08
E9PR30	FAU	2.19567e+09	1.84053e+09	2.61683e+09	2.93052e+09	2934900000	3.0464e+09
E9PRG8	C11orf98	3.30089e+08	4.88881e+08	4.3777e+08	4.44513e+08	633940000	7.45708e+08
E9PS17	SCYL1	9.57317e+08	8.47382e+08	8.98513e+08	1.02259e+09	854540000	8.49186e+08
E9PS63	RABGAP1L	4.79718e+08	1.26577e+08	1.42601e+08	1.1904e+08	109550000	1.12765e+08
E9PSD3	FIBP	4.84306e+07	4.6725e+07	4.83323e+07	3.64227e+07	29173000	4.44168e+07
E9PSI1	CHMP4A	1.91747e+09	2.90132e+09	2.12515e+09	2.27297e+09	3211800000	2.66085e+09
F1T0I1	SEC16A	1.14201e+09	1.27845e+09	1.21095e+09	1.2208e+09	1286300000	8.32631e+08
F2Z2B9	TUBGCP2	1.77724e+08	1.97686e+08	2.68957e+08	2.41935e+08	109540000	1.17779e+08
F2Z3J9	PTGR1	3.0548e+09	3.68243e+09	3.21416e+09	3.10656e+09	4075800000	3.3835e+09
F5GWE5	PITPNA	3.84178e+08	3.75177e+08	2.05105e+08	1.93923e+08	233490000	2.9725e+08
F5GWH5	TMEM258	1.21984e+08	1.4414e+08	1.55289e+08	1.26277e+08	110190000	1.09488e+08
F5GXE4	ATE1	6.3466e+08	2.17131e+08	3.01829e+08	1.57345e+08	240910000	2.02721e+08
F5GXX5	DAD1	1.08662e+09	1.22891e+09	1.68728e+09	1.11126e+09	1138900000	1.53545e+09
F5GY68	ANAPC5	5.21561e+07	3.95948e+07	5.5218e+07	5.57913e+07	56188000	6.09637e+07
F5GYK2	STRN4	4.0912e+08	8.99856e+08	4.18874e+08	7.50719e+08	633970000	1.01065e+09
F5GYQ1	ATP6V0D1	9.35628e+08	8.76257e+08	6.58924e+08	8.13092e+08	647710000	1.00886e+09
F5GYV5	ARL6IP4	1.18939e+08	1.7161e+08	2.06691e+08	1.33237e+08	156950000	1.51414e+08
F5GZ28	LIG1	1.02347e+09	1.24285e+09	1.42712e+09	1.6768e+09	1833900000	1.7318e+09
F5GZS6	SLC3A2	1.57145e+10	1.49864e+10	1.63313e+10	1.77313e+10	18438000000	1.75753e+10
F5H008	VPS33B	1.01921e+08	1.67768e+08	8.3148e+07	6.04385e+07	158940000	6.59705e+07
F5H0P4	HMBS	2.46753e+09	2.21129e+09	2.22629e+09	1.85137e+09	1607100000	1.31338e+09
F5H0R1	TUT1	4.5541e+07	6.0715e+07	4.22675e+07	3.57145e+07	5.99942e+07	8.56689e+07
F5H1Z6	STARD10	1.52557e+09	1.13227e+09	1.074e+09	7.51974e+08	1193400000	1.19882e+09
F5H2I2	DDX55	4.84197e+08	5.44359e+08	5.29191e+08	8.56689e+07	570290000	3.89013e+07
F5H2U8	HMGA2	8.028e+08	9.59351e+08	1.04962e+09	9.265e+08	921390000	8.5328e+08
F5H365	SEC23A	1.41437e+10	1.37879e+10	1.42959e+10	1.39774e+10	13373000000	1.30117e+10
F5H3Y4	DHX37	1.09829e+08	9.53257e+07	1.08551e+08	9.11096e+07	120950000	1.43207e+08
F5H442	TSG101	3.23482e+08	3.49695e+08	5.13893e+08	5.11816e+08	239350000	1.92749e+08
F5H4I5	ITM2C	6.62506e+07	7.04686e+07	4.28757e+07	6.71119e+07	4.64496e+07	5.3384e+07
F5H5N1	NDUFS7	4.65779e+08	4.68754e+08	3.48507e+08	3.36549e+08	353950000	3.49121e+08
F5H619	HEATR5A	1.92648e+08	2.16088e+08	2.10673e+08	1.75406e+08	177080000	1.95791e+08
F5H625	DHX40	8.68893e+07	1.18259e+08	4.15127e+07	4.4415e+07	123800000	7.81566e+07
F5H658	DHX8	3.35353e+07	5.52882e+07	4.6328e+07	5.85516e+07	4.33983e+07	4.97295e+07
F5H6E2	MYO1C	4.69683e+09	4.12428e+09	3.78003e+09	2.88113e+09	3330600000	3.32237e+09
F5H6X0	GTF2H3	4.21199e+07	6.14746e+07	8.27311e+07	4.83095e+07	4.06625e+07	4.95166e+07
F5H702	MRPL48	2.40547e+08	2.75709e+08	3.1271e+08	2.26955e+08	200130000	2.08552e+08
F5H8F7	ASH2L	4.40544e+08	3.6442e+08	1.70988e+08	4.00242e+08	442140000	4.5458e+08
F5H8H2	MVK	2.58098e+08	3.07753e+08	3.42973e+08	4.40479e+08	361780000	4.01132e+08
F6U1T9	PPP3R1	2.36802e+08	1.66637e+08	1.51929e+08	1.31045e+08	223290000	1.94016e+08
F6V2D4	LGALS8	1.50872e+08	1.61478e+08	1.30893e+08	3.24756e+08	266140000	2.67794e+08
F6VZ39	RBM38	3.52332e+07	1.02198e+08	1.64234e+08	1.85634e+08	172490000	1.42606e+08
F6XEV2	MICU1	1.82913e+08	1.75677e+08	2.01669e+08	1.98291e+08	168170000	1.28568e+08
F8VNT9	CD63	6.05497e+07	1.33364e+08	2.3634e+08	2.48023e+08	103390000	1.06098e+08
F8VSC5	SCYL2	1.8157e+08	2.04561e+08	1.93551e+08	2.15366e+08	217670000	2.05782e+08
F8VUA2	CHMP1A	3.16609e+08	5.06337e+08	4.86827e+08	4.53731e+08	555830000	5.00253e+08
F8VVA7	COPZ1	2.15079e+09	2.80478e+09	2.06725e+09	2.06523e+09	2360300000	1.92242e+09
F8VX04	SLC38A1	1.17804e+08	9.5978e+07	1.09677e+08	1.09553e+08	80119000	7.45088e+07
F8VXC8	SMARCC2	1.27089e+08	2.15405e+08	9.32451e+08	4.30177e+07	183230000	2.51014e+08
F8VYE8	PPP1CC	7.78308e+08	8.04865e+08	6.49723e+08	7.52072e+08	1113700000	9.95529e+08
F8VYN9	ARL1	2.67466e+08	2.60331e+08	3.41652e+08	3.06801e+08	242560000	4.69388e+08
F8VZJ2	NACA	8.03826e+09	7.30323e+09	7.79456e+09	1.008e+10	9972500000	9.69049e+09
F8W038	C17orf49	2.12702e+08	1.5236e+08	9.84297e+07	3.69141e+08	332080000	2.81475e+08
F8W1A4	AK2	9.8301e+09	8.82011e+09	8.96125e+09	8.87461e+09	7719100000	6.56033e+09
F8W1B9	YEATS4	5.78319e+07	4.87204e+07	6.33419e+07	7.59415e+07	70386000	5.41682e+07
F8W726	UBAP2L	2.55062e+09	2.47039e+09	2.63653e+09	3.12123e+09	2800700000	2.71644e+09
F8W7C6	RPL10	5.26249e+08	4.98389e+08	5.09356e+08	6.46692e+08	456590000	6.94391e+08
[truncated: 3,375 more rows]

## Sheet: DIA_M2
Protein_ID	Genename	C3_1	C3_2	C3_3	M2_1	M2_2	M2_3
[truncated: 7,649 more rows]

[truncated: 1 more sheets: DDA_M2]
