# Supplementary figures and images for: In-Depth Analysis of Data Characteristics and Comparative Evaluation of DDA and DIA Accuracy in Label-Free Quantitative Proteomics of Biological Samples
Source: Research Square preprint supplement (doi:10.21203/rs.3.rs-7430109/v1), 2025-09-11

Supplementary Figure 2

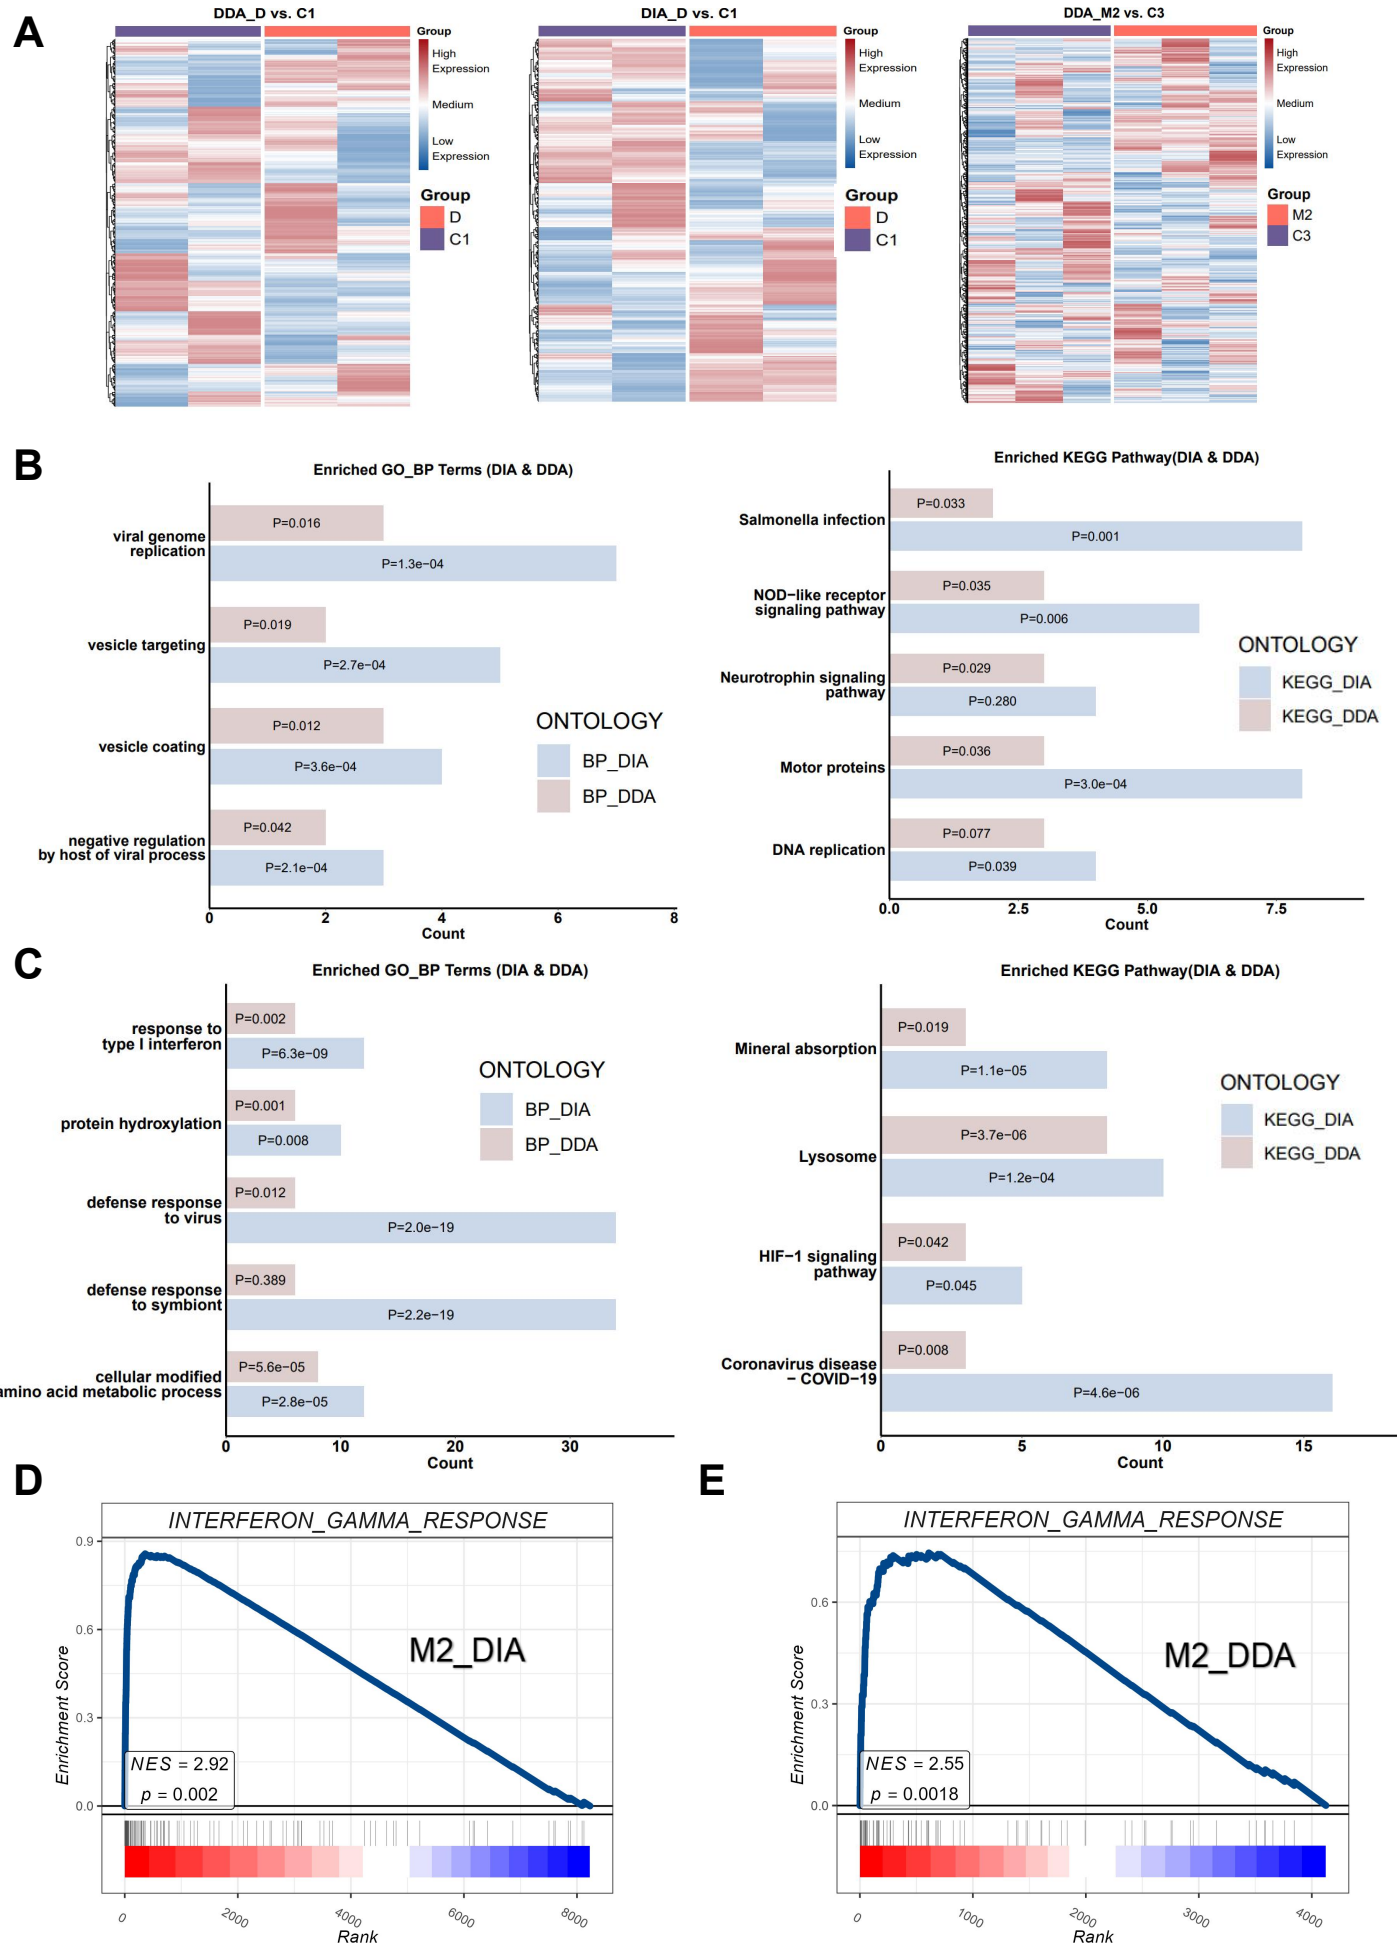

Supplement: Supplementary file 1 [file 076943f095acbbf230e6daca.pdf]
